# Supplementary material
Source: MDPI journal article supplement (https://www.mdpi.com/2072-4292/14/15/3582)
Supplement: s1 [file s1]

## SUPPLEMENTARY MATERIAL

Table S1. Specifications of the devices used on the UAV for this work.

|                                                                                                                                                                                                                                                                        | Sensor name              | Specifications |                                                                                                                                                                                                                                                                                                                                                                                                                                                                                                                                  |
|------------------------------------------------------------------------------------------------------------------------------------------------------------------------------------------------------------------------------------------------------------------------|--------------------------|----------------|----------------------------------------------------------------------------------------------------------------------------------------------------------------------------------------------------------------------------------------------------------------------------------------------------------------------------------------------------------------------------------------------------------------------------------------------------------------------------------------------------------------------------------|
| <br><br><br><br> | DJI Zenmuse L1           | LiDAR          | <ul style="list-style-type: none"> <li>Ranging Accuracy: 3 cm @ 100 m</li> <li>Maximum Returns Supported: 3</li> <li>Scan Modes: Non-repetitive scanning pattern, Repetitive scanning pattern</li> <li>FOV: Non-repetitive scanning pattern: 70.4° (horizontal) × 77.2° (vertical); Repetitive scanning pattern: 70.4° (horizontal) × 4.5° (vertical)</li> </ul>                                                                                                                                                                 |
|                                                                                                                                                                                                                                                                        |                          | RGB camera     | <ul style="list-style-type: none"> <li>Sensor Size: 1 inch</li> <li>Effective Pixels: 20 MP</li> <li>Photo Size: 5472×3078 (16:9); 4864×3648 (4:3); 5472×3648 (3:2)</li> <li>Focal Length: 24 mm</li> <li>Shutter Speed: Mechanical Shutter Speed: 1/2000 – 8 s; Electronic Shutter Speed: 1/8000 - 8 s</li> <li>Aperture Range: f/2.8 - f/11</li> </ul>                                                                                                                                                                         |
|                                                                                                                                                                                                                                                                        | DJI Zenmuse P1           |                | <ul style="list-style-type: none"> <li>Sensor: Sensor size (Still): 35.9×24 mm (Full-frame)</li> <li>Effective Pixels: 45MP</li> <li>Pixel size: 4.4 μm</li> <li>Lens: 35mm</li> <li>FOV: 63.5°</li> <li>Photo Size: 3:2 (8192×5460)</li> <li>Minimum photo interval: 0.7 s</li> <li>Shutter Speed: Mechanical Shutter Speed: 1/2000-1 s; Electronic Shutter Speed: 1/8000-1 s.</li> <li>Aperture Range: f/2.8-f/16</li> </ul>                                                                                                   |
|                                                                                                                                                                                                                                                                        | Micasense RedEdge MxDual |                | <ul style="list-style-type: none"> <li>Spectral bands: Coastal blue 444(28), blue 475(32), green 531(14), green 560(27), red 650(16), red 668(14), red edge 705(10), red edge 717(12), red edge 740(18), NIR 842(57)</li> <li>RGB output: 3.6 MP (global shutter, aligned with all bands)</li> <li>Sensor resolution: 1280 x 960 (1.2 MP per EO band)</li> <li>Ground sample distance: 8 cm per pixel (per band) at 120 m AGL</li> <li>Capture rate: 1 capture per second (all bands), 12-bit RAW</li> <li>FOV: 47.2°</li> </ul> |

Table S2. Errors in the three coordinates for deliverables from the photogrammetric processing of images from the photogrammetric (P1) and LiDAR (L1) sensors.

| mission | product     | Mean RMSE (m) | Error X (m) | Error Y (m) | Error Z (m) |
|---------|-------------|---------------|-------------|-------------|-------------|
| P1      | Orthomosaic | 0.044         | 0.012       | 0.009       | 0.111       |
| 100m-L1 | Orthomosaic | 0.006         | 0.004       | 0.005       | 0.011       |
| 60m-L1  | Orthomosaic | 0.010         | 0.007       | 0.009       | 0.014       |

Table S3. Coordinates values for ground control points (GCPs) collected on the field (northing, easting, elevation), elevation values of the corresponding point picked from the DEM generated from P1 survey (DEM\_P1\_elev column), and root mean square error (RMSE) for the measurements at each point. Elevation values are expressed in ellipsoidal height.

| Point Id | Northing   | Easting    | Elevation (m) | DEM_P1_elev (m) | RMSE (m) |
|----------|------------|------------|---------------|-----------------|----------|
| FIJO1    | 4044956.27 | 753409.887 | 47.457        | 47.313          | 0.144    |
| FIJO2    | 4044977.14 | 753406.24  | 47.431        | 46.073          | 1.357    |
| FIJO3    | 4044998.51 | 753402.33  | 47.413        | 46.014          | 1.400    |
| FIJO4    | 4045015.14 | 753397.715 | 47.505        | 47.341          | 0.165    |
| FIJO5    | 4044917.42 | 753417.253 | 47.242        | 46.015          | 1.227    |
| FIJO6    | 4044893.1  | 753420.756 | 47.371        | 46.545          | 0.825    |

|                                  |            |            |        |        |       |
|----------------------------------|------------|------------|--------|--------|-------|
| P1                               | 4044900.66 | 753413.59  | 46.239 | 46.165 | 0.075 |
| P10                              | 4044893.73 | 753395.959 | 46.087 | 46.093 | 0.006 |
| P11                              | 4044892.84 | 753393.566 | 46.213 | 46.273 | 0.060 |
| P12                              | 4044891.74 | 753390.925 | 46.194 | 46.246 | 0.052 |
| P13                              | 4044890.49 | 753387.564 | 46.184 | 46.221 | 0.037 |
| P14                              | 4044889.1  | 753384.177 | 46.127 | 46.108 | 0.019 |
| P15                              | 4044888.81 | 753383.532 | 45.774 | 45.671 | 0.103 |
| P16                              | 4044888.03 | 753381.221 | 45.759 | 45.661 | 0.099 |
| P17                              | 4044887.89 | 753380.349 | 46.019 | 46.063 | 0.043 |
| P18                              | 4044887.01 | 753378.683 | 46.096 | 46.148 | 0.053 |
| P19                              | 4044885.69 | 753375.17  | 46.078 | 46.076 | 0.001 |
| P2                               | 4044899.99 | 753411.886 | 46.069 | 46.047 | 0.023 |
| P20                              | 4044884.55 | 753372.071 | 46.090 | 46.087 | 0.003 |
| P21                              | 4044883.27 | 753368.996 | 46.089 | 46.034 | 0.055 |
| P22                              | 4044882.41 | 753366.848 | 45.952 | 45.945 | 0.006 |
| P23                              | 4044881.82 | 753365.448 | 45.735 | 45.735 | 0.000 |
| P24                              | 4044881.51 | 753364.637 | 46.039 | 46.011 | 0.028 |
| P25                              | 4044880.8  | 753362.708 | 45.970 | 45.924 | 0.047 |
| P26                              | 4044879.92 | 753360.621 | 45.950 | 45.902 | 0.048 |
| P27                              | 4044879.53 | 753359.506 | 45.681 | 45.679 | 0.002 |
| P28                              | 4044879.16 | 753358.179 | 45.863 | 45.779 | 0.085 |
| P29                              | 4044878.18 | 753356.207 | 45.723 | 45.737 | 0.014 |
| P3                               | 4044899.12 | 753409.33  | 45.960 | 45.929 | 0.030 |
| P30                              | 4044877.59 | 753354.545 | 45.513 | 45.543 | 0.030 |
| P31                              | 4044876.49 | 753351.732 | 45.768 | 45.648 | 0.120 |
| P32                              | 4044875.71 | 753349.429 | 45.712 | 45.625 | 0.087 |
| P33                              | 4044874.59 | 753346.784 | 45.687 | 45.611 | 0.077 |
| P34                              | 4044873.95 | 753345.122 | 45.663 | 45.593 | 0.070 |
| P35                              | 4044873.25 | 753343.332 | 45.583 | 45.603 | 0.021 |
| P4                               | 4044898.36 | 753407.472 | 45.686 | 45.756 | 0.070 |
| P5                               | 4044898.01 | 753406.763 | 45.717 | 45.673 | 0.044 |
| P6                               | 4044897.38 | 753405.045 | 45.917 | 45.868 | 0.048 |
| P7                               | 4044896.59 | 753403.175 | 46.017 | 45.953 | 0.064 |
| P8                               | 4044895.76 | 753401.04  | 46.135 | 46.143 | 0.008 |
| P9                               | 4044894.81 | 753398.4   | 46.147 | 46.166 | 0.018 |
| T10                              | 4044911.8  | 753378.145 | 46.175 | 46.275 | 0.100 |
| T14                              | 4044888.31 | 753353.756 | 45.990 | 45.976 | 0.014 |
| T15                              | 4044889.69 | 753350.151 | 45.944 | 45.852 | 0.092 |
| T17                              | 4044914.63 | 753378.203 | 46.181 | 46.236 | 0.055 |
| T20                              | 4044881.88 | 753351.38  | 45.951 | 45.886 | 0.065 |
| T21                              | 4044875.79 | 753336.584 | 45.612 | 45.487 | 0.125 |
| T22                              | 4044876.39 | 753335.734 | 45.697 | 45.525 | 0.172 |
| T23                              | 4044877.88 | 753334.523 | 45.691 | 45.563 | 0.128 |
| T24                              | 4044878.61 | 753333.455 | 45.731 | 45.590 | 0.141 |
| T25                              | 4044878.85 | 753332.58  | 45.689 | 45.576 | 0.113 |
| T30                              | 4044888.44 | 753347.223 | 45.966 | 45.875 | 0.091 |
| T35                              | 4044886.2  | 753344.858 | 45.878 | 45.770 | 0.107 |
| T46                              | 4044912.31 | 753369.553 | 46.119 | 46.141 | 0.022 |
| T56                              | 4044910.58 | 753380.401 | 46.164 | 46.159 | 0.006 |
| T68                              | 4044912.79 | 753372.335 | 46.159 | 46.203 | 0.044 |
| average RMSE                     |            |            |        |        | 0.335 |
| average RMSE, just marsh surface |            |            |        |        | 0.070 |

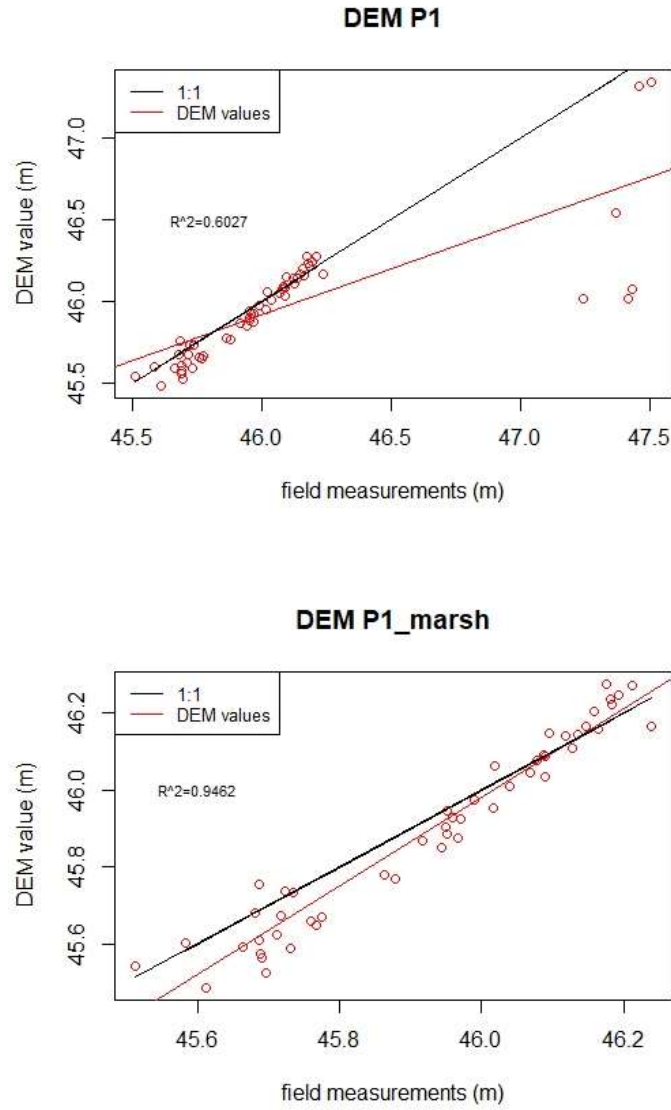

Figure S1. Linear regression and  $R^2$  value for DEM generated from data collected through P1 sensor by using all points (DEM P1) and focusing on marsh surface points (DEM P1 marsh). The red line is the regression line for the compared datasets (DEM extracted values vs. GCPs values), the black line represents the 1:1 pattern for reference.

Table S4. Statistics for classification of 100 m-L1 data by setting 0.03 m (ng\_003) as threshold for non-ground points in the auto- classification algorithm.

| Classification (ng_003)       | Point Count | %     | Z Min | Z Max |
|-------------------------------|-------------|-------|-------|-------|
| 0 - Created, never classified | 78,632,212  | 88.64 | 43.61 | 47.49 |
| 2 - Ground                    | 9,949,536   | 11.22 | 43.55 | 47.49 |
| 7 - Low Point (Noise)         | 89,669      | 0.10  | 43.54 | 47.44 |
| 18 - High Point (Noise)       | 36,054      | 0.04  | 43.87 | 47.49 |

Table S5. Statistics for classification of 100 m-L1 data by setting 0.10 m (ng\_010) as threshold for non-ground points in the auto- classification algorithm.

| Classification (ng_010)       | Point Count | %     | Z Min | Z Max |
|-------------------------------|-------------|-------|-------|-------|
| 0 - Created, never classified | 19,091,871  | 21.52 | 43.62 | 47.49 |
| 2 - Ground                    | 69,489,877  | 78.34 | 43.55 | 47.49 |
| 7 - Low Point (Noise)         | 89,669      | 0.10  | 43.54 | 47.44 |
| 18 - High Point (Noise)       | 36,054      | 0.04  | 43.87 | 47.49 |

Table S6. Resolutions and minimum and maximum elevation values for the four DEMs generated for the 100m L1 mission. Ng-threshold: value used for the classification. grid ps: value of grid point spacing for the generation of the DEM.

| DEM file        | ng-threshold | Grid ps | Resolution (m/pixel) | Min elevation (m) | Max elevation (m) |
|-----------------|--------------|---------|----------------------|-------------------|-------------------|
| DEM_5ps-ng_003  | 0.03         | 5       | 0.27                 | 43.68             | 47.49             |
| DEM_5ps-ng_010  | 0.10         | 5       | 0.27                 | 43.76             | 47.49             |
| DEM_10ps-ng_003 | 0.03         | 10      | 0.55                 | 43.68             | 47.49             |
| DEM_10ps-ng_010 | 0.10         | 10      | 0.55                 | 43.72             | 47.49             |

Table S7. Elevation values for GCPs, elevation values of the corresponding point from the LiDAR point cloud of 100 m- L1 survey, and RMSE value at each point. Elevation values are expressed in ellipsoidal height.

| Point ID | Point elevation (m) | LIDAR elevation (m) | RMSE (m) |
|----------|---------------------|---------------------|----------|
| P11      | 46.213              | 46.438              | 0.225    |
| P12      | 46.194              | 46.394              | 0.2      |
| P27      | 45.681              | 45.876              | 0.195    |
| T17      | 46.181              | 46.372              | 0.191    |
| T10      | 46.175              | 46.361              | 0.186    |
| P18      | 46.096              | 46.272              | 0.176    |
| T56      | 46.164              | 46.335              | 0.171    |
| P13      | 46.184              | 46.353              | 0.169    |
| P22      | 45.951              | 46.107              | 0.156    |
| P35      | 45.583              | 45.737              | 0.154    |
| P23      | 45.735              | 45.889              | 0.154    |
| P10      | 46.087              | 46.239              | 0.152    |
| P29      | 45.723              | 45.872              | 0.149    |
| P14      | 46.127              | 46.275              | 0.148    |
| P9       | 46.147              | 46.295              | 0.148    |
| P4       | 45.686              | 45.83               | 0.144    |
| P8       | 46.135              | 46.277              | 0.142    |
| T46      | 46.119              | 46.258              | 0.139    |
| T14      | 45.99               | 46.127              | 0.137    |
| P20      | 46.09               | 46.225              | 0.135    |
| T68      | 46.159              | 46.29               | 0.131    |
| P19      | 46.078              | 46.207              | 0.129    |
| P17      | 46.019              | 46.148              | 0.129    |
| P33      | 45.687              | 45.799              | 0.112    |
| P25      | 45.97               | 46.08               | 0.11     |
| P21      | 46.089              | 46.194              | 0.105    |
| P28      | 45.863              | 45.968              | 0.105    |
| P26      | 45.95               | 46.048              | 0.098    |
| P24      | 46.039              | 46.133              | 0.094    |
| T20      | 45.951              | 45.857              | 0.094    |
| P6       | 45.917              | 46.008              | 0.091    |
| P7       | 46.017              | 46.104              | 0.087    |
| P15      | 45.774              | 45.859              | 0.085    |
| P16      | 45.759              | 45.84               | 0.081    |
| P1       | 46.239              | 46.311              | 0.072    |
| P2       | 46.069              | 46.121              | 0.052    |
| T35      | 45.878              | 45.926              | 0.048    |
| P32      | 45.712              | 45.757              | 0.045    |
| P30      | 45.513              | 45.557              | 0.044    |
| T25      | 45.689              | 45.732              | 0.043    |
| T30      | 45.966              | 45.999              | 0.033    |
| P3       | 45.96               | 45.993              | 0.033    |
| T22      | 45.697              | 45.72               | 0.023    |
| T24      | 45.731              | 45.709              | 0.022    |
| FIJO4    | 47.505              | 47.485              | 0.02     |
| P34      | 45.663              | 45.682              | 0.019    |
| T23      | 45.691              | 45.708              | 0.017    |
| FIJO6    | 47.371              | 47.355              | 0.016    |

|                     |        |        |              |
|---------------------|--------|--------|--------------|
| P5                  | 45.717 | 45.703 | 0.014        |
| FIJO3               | 47.413 | 47.4   | 0.013        |
| T21                 | 45.612 | 45.62  | 0.008026     |
| P31                 | 45.768 | 45.776 | 0.007607     |
| T15                 | 45.944 | 45.937 | 0.006802     |
| FIJO2               | 47.431 | 47.427 | 0.003841     |
| FIJO5               | 47.242 | 47.245 | 0.002522     |
| <b>Average RMSE</b> |        |        | <b>0.115</b> |

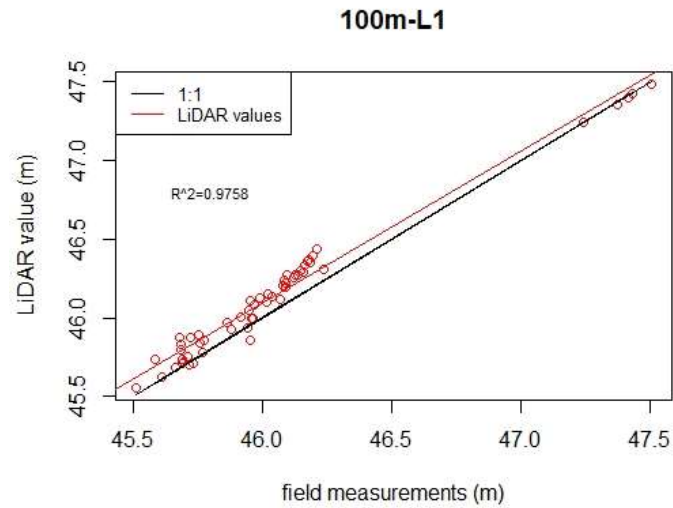

Figure S2. Linear regression and  $R^2$  value for point cloud values obtained from the L1 flight operated at 100m compared to GCPs. The red line is the regression line for the compared datasets, the black line represents the 1:1 pattern.

Table S8. Elevation values for GCPs, and the corresponding point from DEMs derived from the 100 m- L1 survey. 'Elevation' column represents the GCP elevation value, the following columns show the corresponding values of elevation sampled from each DEM. DEMs are identified by point spacing (10 or 05) and non-ground threshold (0.03 and 0.10) used for their generation. In the last four columns, the RMSE value associated to each point. Elevation values are expressed in ellipsoidal height.

| Point Id | Elevation (m) | DEM-10_003 | DEM-10_010 | DEM-05_003 | DEM-05_010 | RMSE_ DEM-10-003 | RMSE_ DEM-10-010 | RMSE_ DEM-5-003 | RMSE_ DEM-05-010 |
|----------|---------------|------------|------------|------------|------------|------------------|------------------|-----------------|------------------|
| FIJO1    | 47.457        | 47.441     | 47.456     | 47.437     | 47.455     | 0.016            | 0.001            | 0.020           | 0.002            |
| FIJO2    | 47.431        | 47.389     | 47.418     | 47.395     | 47.430     | 0.042            | 0.013            | 0.036           | 0.001            |
| FIJO3    | 47.413        | 47.375     | 47.421     | 47.364     | 47.405     | 0.038            | 0.008            | 0.049           | 0.008            |
| FIJO4    | 47.505        | 47.468     | 47.474     | 47.476     | 47.479     | 0.037            | 0.031            | 0.029           | 0.026            |
| FIJO5    | 47.242        | 47.226     | 47.243     | 47.229     | 47.248     | 0.016            | 0.001            | 0.013           | 0.006            |
| FIJO6    | 47.371        | 47.334     | 47.360     | 47.320     | 47.357     | 0.037            | 0.011            | 0.051           | 0.014            |
| P1       | 46.239        | 46.251     | 46.311     | 46.266     | 46.305     | 0.012            | 0.072            | 0.027           | 0.066            |
| P10      | 46.087        | 46.221     | 46.244     | 46.224     | 46.247     | 0.134            | 0.157            | 0.137           | 0.160            |
| P11      | 46.213        | 46.317     | 46.405     | 46.311     | 46.418     | 0.105            | 0.193            | 0.099           | 0.206            |
| P12      | 46.194        | 46.291     | 46.347     | 46.297     | 46.364     | 0.097            | 0.153            | 0.103           | 0.170            |
| P13      | 46.184        | 46.294     | 46.333     | 46.288     | 46.348     | 0.110            | 0.149            | 0.104           | 0.164            |
| P14      | 46.127        | 46.151     | 46.275     | 45.966     | 46.137     | 0.024            | 0.148            | 0.161           | 0.010            |
| P15      | 45.774        | 45.807     | 45.829     | 45.813     | 45.852     | 0.033            | 0.055            | 0.039           | 0.078            |
| P16      | 45.759        | 45.835     | 45.874     | 45.827     | 45.837     | 0.076            | 0.115            | 0.068           | 0.078            |
| P17      | 46.019        | 45.842     | 45.979     | 45.935     | 46.153     | 0.177            | 0.040            | 0.084           | 0.134            |
| P18      | 46.096        | 46.218     | 46.275     | 46.209     | 46.281     | 0.123            | 0.179            | 0.114           | 0.185            |
| P19      | 46.078        | 46.180     | 46.219     | 46.182     | 46.227     | 0.102            | 0.141            | 0.104           | 0.149            |
| P2       | 46.069        | 46.119     | 46.149     | 46.116     | 46.142     | 0.050            | 0.080            | 0.047           | 0.073            |
| P20      | 46.090        | 46.186     | 46.223     | 46.180     | 46.216     | 0.096            | 0.133            | 0.090           | 0.126            |
| P21      | 46.089        | 46.152     | 46.194     | 46.157     | 46.190     | 0.063            | 0.105            | 0.068           | 0.101            |
| P22      | 45.952        | 45.807     | 46.042     | 45.805     | 46.028     | 0.145            | 0.090            | 0.147           | 0.076            |
| P23      | 45.735        | 45.723     | 45.915     | 45.708     | 45.837     | 0.012            | 0.180            | 0.027           | 0.102            |
| P24      | 46.039        | 45.800     | 46.145     | 45.729     | 46.149     | 0.239            | 0.106            | 0.310           | 0.110            |
| P25      | 45.970        | 45.987     | 46.078     | 46.026     | 46.094     | 0.017            | 0.108            | 0.056           | 0.124            |
| P26      | 45.950        | 45.941     | 46.052     | 45.983     | 46.031     | 0.009            | 0.102            | 0.033           | 0.081            |
| P27      | 45.681        | 45.823     | 45.936     | 45.773     | 45.822     | 0.142            | 0.255            | 0.092           | 0.141            |
| P28      | 45.863        | 45.816     | 45.978     | 45.779     | 45.927     | 0.047            | 0.115            | 0.084           | 0.064            |
| P29      | 45.723        | 45.795     | 45.925     | 45.784     | 45.868     | 0.072            | 0.202            | 0.061           | 0.145            |
| P3       | 45.960        | 45.986     | 46.023     | 45.987     | 46.026     | 0.026            | 0.063            | 0.027           | 0.066            |
| P30      | 45.513        | 45.651     | 45.726     | 45.616     | 45.730     | 0.138            | 0.213            | 0.103           | 0.217            |
| P31      | 45.768        | 45.742     | 45.838     | 45.716     | 45.844     | 0.026            | 0.070            | 0.052           | 0.076            |
| P32      | 45.712        | 45.763     | 45.812     | 45.763     | 45.811     | 0.051            | 0.100            | 0.051           | 0.099            |
| P33      | 45.687        | 45.705     | 45.775     | 45.729     | 45.799     | 0.018            | 0.088            | 0.042           | 0.112            |
| P34      | 45.663        | 45.706     | 45.775     | 45.704     | 45.771     | 0.043            | 0.112            | 0.041           | 0.108            |
| P35      | 45.583        | 45.712     | 45.769     | 45.705     | 45.764     | 0.129            | 0.186            | 0.122           | 0.181            |
| P4       | 45.686        | 45.753     | 45.876     | 45.769     | 45.851     | 0.067            | 0.190            | 0.083           | 0.165            |
| P5       | 45.717        | 45.692     | 45.736     | 45.696     | 45.719     | 0.025            | 0.019            | 0.021           | 0.002            |
| P6       | 45.917        | 45.899     | 45.960     | 45.946     | 45.987     | 0.018            | 0.043            | 0.029           | 0.070            |
| P7       | 46.017        | 46.080     | 46.124     | 46.024     | 46.077     | 0.063            | 0.107            | 0.007           | 0.060            |
| P8       | 46.135        | 46.211     | 46.261     | 46.190     | 46.266     | 0.076            | 0.126            | 0.055           | 0.131            |
| P9       | 46.147        | 46.250     | 46.302     | 46.267     | 46.295     | 0.103            | 0.155            | 0.120           | 0.148            |
| T10      | 46.175        | 46.305     | 46.339     | 46.279     | 46.397     | 0.130            | 0.164            | 0.104           | 0.222            |
| T14      | 45.990        | 46.073     | 46.112     | 46.078     | 46.118     | 0.083            | 0.122            | 0.088           | 0.128            |
| T15      | 45.944        | 45.974     | 46.034     | 45.986     | 46.028     | 0.030            | 0.090            | 0.042           | 0.084            |
| T17      | 46.181        | 46.313     | 46.363     | 46.306     | 46.360     | 0.132            | 0.182            | 0.125           | 0.179            |
| T20      | 45.951        | 45.990     | 46.040     | 46.003     | 46.037     | 0.039            | 0.089            | 0.052           | 0.086            |
| T21      | 45.612        | 45.545     | 45.633     | 45.550     | 45.633     | 0.067            | 0.021            | 0.062           | 0.021            |

|                     |        |        |        |        |        |              |              |              |              |
|---------------------|--------|--------|--------|--------|--------|--------------|--------------|--------------|--------------|
| T22                 | 45.697 | 45.611 | 45.690 | 45.597 | 45.685 | 0.086        | 0.007        | 0.100        | 0.012        |
| T23                 | 45.691 | 45.638 | 45.712 | 45.636 | 45.727 | 0.053        | 0.021        | 0.055        | 0.036        |
| T24                 | 45.731 | 45.637 | 45.713 | 45.641 | 45.710 | 0.094        | 0.018        | 0.090        | 0.021        |
| T25                 | 45.689 | 45.647 | 45.703 | 45.637 | 45.699 | 0.042        | 0.014        | 0.052        | 0.010        |
| T30                 | 45.966 | 45.985 | 46.039 | 45.993 | 46.036 | 0.019        | 0.073        | 0.027        | 0.070        |
| T35                 | 45.878 | 45.876 | 45.946 | 45.903 | 45.952 | 0.002        | 0.068        | 0.025        | 0.074        |
| T46                 | 46.119 | 46.220 | 46.258 | 46.222 | 46.270 | 0.101        | 0.139        | 0.103        | 0.151        |
| T56                 | 46.164 | 46.266 | 46.310 | 46.275 | 46.321 | 0.102        | 0.146        | 0.111        | 0.157        |
| T68                 | 46.159 | 46.257 | 46.313 | 46.253 | 46.306 | 0.098        | 0.154        | 0.094        | 0.147        |
| <b>Average RMSE</b> |        |        |        |        |        | <b>0.086</b> | <b>0.120</b> | <b>0.088</b> | <b>0.115</b> |

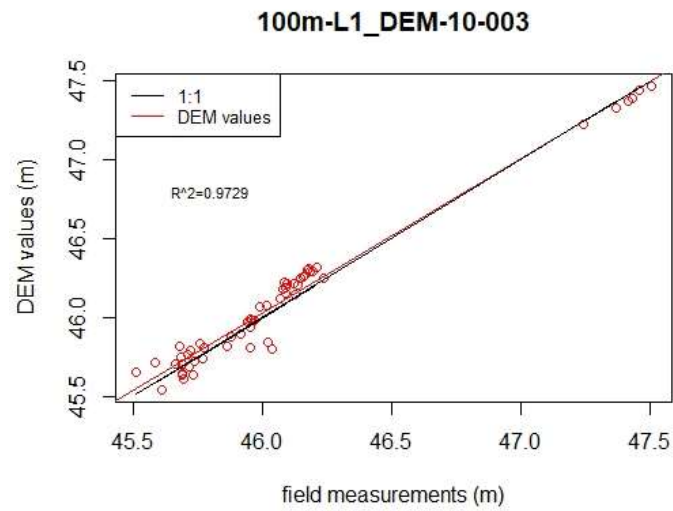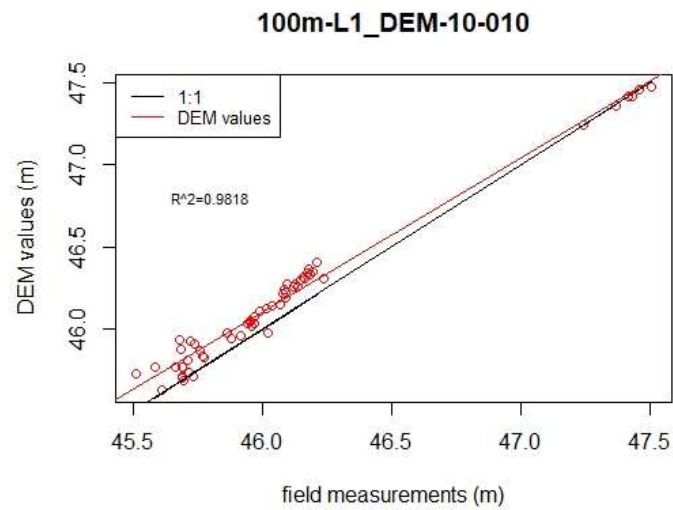

Figure S3. (Continue)

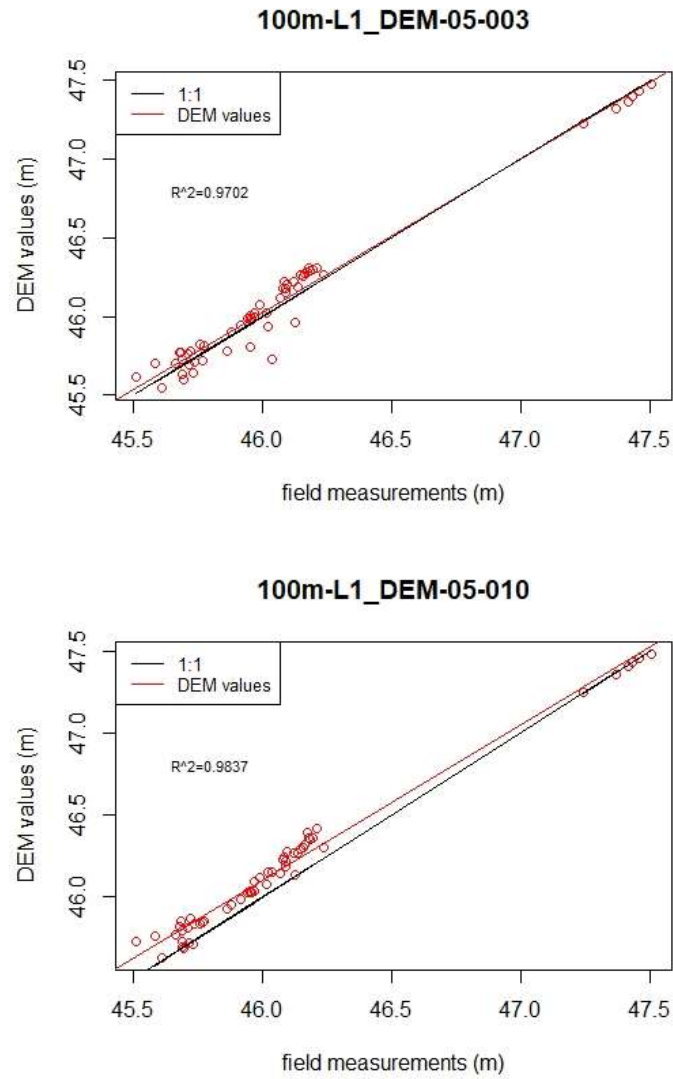

Figure S3. Linear regressions and  $R^2$  values for the four DEMs generated from the L1 flight at 100m compared to GCPs. The red line is the regression line for the compared datasets, the black line represents the 1:1 pattern.

Table S9. Resume of accuracy assessment for DEMs obtained from 100m-L1 mission.

| DEM file        | RMSE  | $R^2$  |
|-----------------|-------|--------|
| DEM_10ps-ng_003 | 0.086 | 0.9729 |
| DEM_10ps-ng_010 | 0.120 | 0.9818 |
| DEM_5ps-ng_003  | 0.088 | 0.9702 |
| DEM_5ps-ng_010  | 0.115 | 0.9837 |

Table S10. Statistics for classification of 60 m-L1 data by setting 0.03 m (ng\_003) as threshold for non-ground points in the auto- classification algorithm.

| Classification (ng_003)       | Point Count | %     | Z Min | Z Max |
|-------------------------------|-------------|-------|-------|-------|
| 0 - Created, never classified | 103,862,442 | 71.24 | 43.50 | 47.39 |
| 2 - Ground                    | 41,639,385  | 28.56 | 43.37 | 47.39 |
| 7 - Low Point (Noise)         | 220,031     | 0.15  | 43.36 | 47.37 |
| 18 - High Point (Noise)       | 68,858      | 0.05  | 43.77 | 47.39 |

Table S11. Statistics for classification of 60 m-L1 data by setting 0.10 m (ng\_010) as threshold for non-ground points in the auto- classification algorithm.

| Classification (ng_010)       | Point Count | %     | Z Min | Z Max |
|-------------------------------|-------------|-------|-------|-------|
| 0 - Created, never classified | 9,067,115   | 6.22  | 43.50 | 47.39 |
| 2 - Ground                    | 136,434,712 | 93.58 | 43.37 | 47.39 |
| 7 - Low Point (Noise)         | 220,031     | 0.15  | 43.36 | 47.37 |
| 18 - High Point (Noise)       | 68,858      | 0.05  | 43.77 | 47.39 |

Table S12. Resolutions and minimum and maximum elevation values for the four DEMs generated for the 60m L1 mission. Ng-threshold: value used for the classification. grid ps: value of grid point spacing for the generation of the DEM.

| DEM file        | ng-threshold | Grid point spacing | resolution | Min elevation | Max elevation |
|-----------------|--------------|--------------------|------------|---------------|---------------|
| DEM_5ps-ng_003  | 0.03         | 5                  | 0.13       | 43.45         | 47.39         |
| DEM_5ps-ng_010  | 0.10         | 5                  | 0.13       | 43.49         | 47.39         |
| DEM_10ps-ng_003 | 0.03         | 10                 | 0.26       | 43.46         | 47.39         |
| DEM_10ps-ng_010 | 0.10         | 10                 | 0.26       | 43.55         | 47.39         |

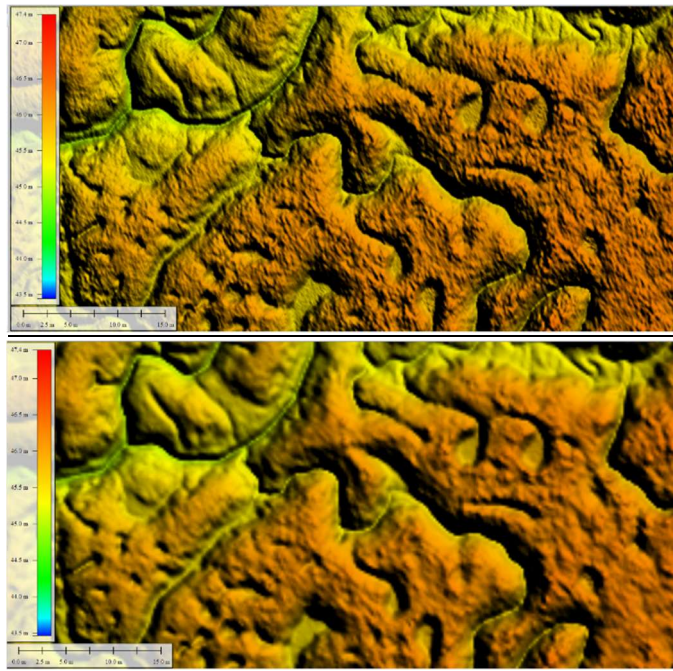

Figure S4. Detail of DEM\_5ps-ng\_010 (0.13 m of resolution) and DEM\_10ps-ng\_010 (0.27 m of resolution).

Table S13. Elevation values for GCPs, elevation values of the corresponding point from the LiDAR point cloud of 60 m- L1 survey, and RMSE value at each point. Elevation values are expressed in ellipsoidal height.

| Point ID | Point elevation (m) | LIDAR elevation (m) | RMSE (m) |
|----------|---------------------|---------------------|----------|
| P17      | 46.019              | 46.212              | 0.193    |
| P30      | 45.513              | 45.697              | 0.184    |
| P4       | 45.686              | 45.84               | 0.154    |
| P23      | 45.735              | 45.889              | 0.154    |
| P35      | 45.583              | 45.727              | 0.144    |
| P11      | 46.213              | 46.356              | 0.143    |
| T10      | 46.175              | 46.317              | 0.142    |
| P12      | 46.194              | 46.335              | 0.141    |
| P8       | 46.135              | 46.273              | 0.138    |
| T17      | 46.181              | 46.319              | 0.138    |
| P18      | 46.096              | 46.209              | 0.113    |
| P13      | 46.184              | 46.296              | 0.112    |
| T68      | 46.159              | 46.271              | 0.112    |
| P10      | 46.087              | 46.195              | 0.108    |
| P9       | 46.147              | 46.254              | 0.107    |
| P29      | 45.723              | 45.826              | 0.103    |
| T56      | 46.164              | 46.267              | 0.103    |
| P27      | 45.681              | 45.784              | 0.103    |
| P22      | 45.951              | 46.052              | 0.101    |
| P34      | 45.663              | 45.758              | 0.095    |
| P2       | 46.069              | 46.152              | 0.083    |
| P14      | 46.127              | 46.207              | 0.08     |
| P24      | 46.039              | 46.116              | 0.077    |
| P33      | 45.687              | 45.761              | 0.074    |
| P32      | 45.712              | 45.785              | 0.073    |
| P20      | 46.09               | 46.161              | 0.071    |
| T14      | 45.99               | 46.059              | 0.069    |
| T20      | 45.951              | 46.014              | 0.063    |
| P7       | 46.017              | 46.077              | 0.06     |
| P6       | 45.917              | 45.976              | 0.059    |
| P16      | 45.759              | 45.817              | 0.058    |
| P28      | 45.863              | 45.919              | 0.056    |
| P3       | 45.96               | 46.015              | 0.055    |
| P21      | 46.089              | 46.143              | 0.054    |
| P5       | 45.717              | 45.77               | 0.053    |
| T46      | 46.119              | 46.171              | 0.052    |
| P25      | 45.97               | 46.016              | 0.046    |
| T35      | 45.878              | 45.924              | 0.046    |
| T23      | 45.691              | 45.732              | 0.041    |
| P26      | 45.95               | 45.99               | 0.04     |
| P1       | 46.239              | 46.278              | 0.039    |
| T21      | 45.612              | 45.647              | 0.035    |
| P19      | 46.078              | 46.11               | 0.032    |
| T15      | 45.944              | 45.976              | 0.032    |
| T25      | 45.689              | 45.718              | 0.029    |
| P15      | 45.774              | 45.793              | 0.019    |

|                     |        |        |              |
|---------------------|--------|--------|--------------|
| FIJO2               | 47.431 | 47.449 | 0.018        |
| T30                 | 45.966 | 45.952 | 0.014        |
| FIJO6               | 47.371 | 47.383 | 0.012        |
| FIJO4               | 47.505 | 47.517 | 0.012        |
| T22                 | 45.697 | 45.687 | 0.01         |
| FIJO5               | 47.242 | 47.25  | 0.008213     |
| FIJO3               | 47.413 | 47.42  | 0.006935     |
| P31                 | 45.768 | 45.774 | 0.005882     |
| T24                 | 45.731 | 45.727 | 0.003712     |
| <b>Average RMSE</b> |        |        | <b>0.089</b> |

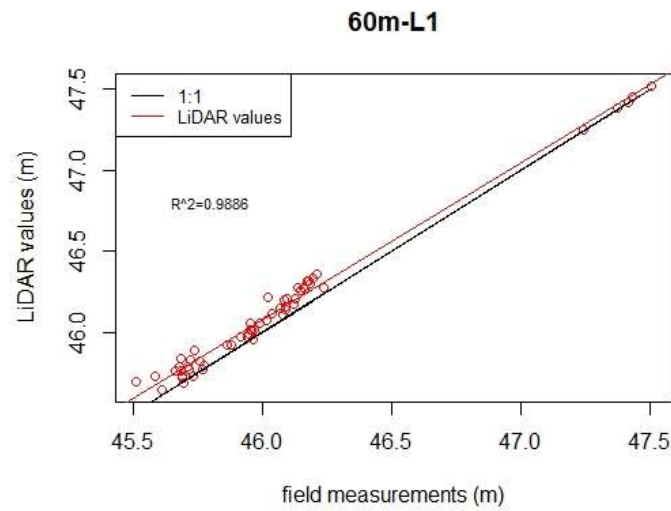

Figure S5. Linear regression and  $R^2$  value for point cloud values obtained from the L1 flight operated at 60m compared to GCPs. The red line is the regression line for the compared datasets, the black line represents the 1:1 pattern.

Table S14. Elevation values for GCPs, and the corresponding point from DEMs derived from the 60 m- L1 survey. 'Elevation' column represents the GCP elevation value, the following columns show the corresponding values of elevation sampled from each DEM. DEMs are identified by point spacing (10 or 05) and non-ground threshold (0.03 and 0.10) used for their generation. In the last four columns, the RMSE value associated to each point. Elevation values are expressed in ellipsoidal height.

| Point Id | Elevation (m) | DEM-10_003 | DEM-10_010 | DEM-05_003 | DEM-05_010 | RMSE_DEM-10-003 | RMSE_DEM-10-010 | RMSE_DEM-05_003 | RMSE_DEM-05_010 |
|----------|---------------|------------|------------|------------|------------|-----------------|-----------------|-----------------|-----------------|
| FIJO1    | 47.457        | 47.027     | 47.335     | 47.001     | 47.326     | 0.430           | 0.122           | 0.456           | 0.131           |
| FIJO2    | 47.431        | 47.384     | 47.383     | 47.385     | 47.385     | 0.047           | 0.048           | 0.046           | 0.046           |
| FIJO3    | 47.413        | 47.390     | 47.390     | 47.386     | 47.386     | 0.023           | 0.023           | 0.027           | 0.027           |
| FIJO4    | 47.505        | 46.701     | 47.229     | -          | -          | 0.804           | 0.276           | -               | -               |
| FIJO5    | 47.242        | 47.237     | 47.245     | 47.237     | 47.245     | 0.005           | 0.003           | 0.005           | 0.003           |
| FIJO6    | 47.371        | 47.368     | 47.375     | 47.374     | 47.378     | 0.003           | 0.004           | 0.003           | 0.007           |
| P1       | 46.239        | 46.283     | 46.297     | 46.294     | 46.304     | 0.044           | 0.058           | 0.055           | 0.065           |
| P10      | 46.087        | 46.204     | 46.214     | 46.212     | 46.218     | 0.117           | 0.127           | 0.125           | 0.131           |
| P11      | 46.213        | 46.347     | 46.387     | 46.339     | 46.388     | 0.135           | 0.175           | 0.127           | 0.176           |
| P12      | 46.194        | 46.339     | 46.364     | 46.334     | 46.361     | 0.145           | 0.170           | 0.140           | 0.167           |
| P13      | 46.184        | 46.299     | 46.312     | 46.304     | 46.327     | 0.115           | 0.128           | 0.120           | 0.143           |
| P14      | 46.127        | 46.134     | 46.226     | 46.187     | 46.202     | 0.007           | 0.099           | 0.060           | 0.075           |
| P15      | 45.774        | 45.784     | 45.797     | 45.785     | 45.799     | 0.010           | 0.023           | 0.011           | 0.025           |
| P16      | 45.759        | 45.795     | 45.827     | 45.782     | 45.804     | 0.036           | 0.068           | 0.023           | 0.045           |
| P17      | 46.019        | 46.074     | 46.153     | 46.109     | 46.173     | 0.055           | 0.134           | 0.090           | 0.154           |
| P18      | 46.096        | 46.219     | 46.238     | 46.217     | 46.232     | 0.124           | 0.142           | 0.121           | 0.136           |
| P19      | 46.078        | 46.164     | 46.181     | 46.167     | 46.189     | 0.086           | 0.103           | 0.089           | 0.111           |
| P2       | 46.069        | 46.142     | 46.153     | 46.150     | 46.160     | 0.073           | 0.084           | 0.081           | 0.091           |
| P20      | 46.090        | 46.157     | 46.189     | 46.159     | 46.181     | 0.067           | 0.099           | 0.069           | 0.091           |
| P21      | 46.089        | 46.107     | 46.150     | 46.113     | 46.154     | 0.018           | 0.061           | 0.024           | 0.065           |
| P22      | 45.952        | 45.936     | 46.026     | 46.007     | 46.056     | 0.016           | 0.075           | 0.055           | 0.104           |
| P23      | 45.735        | 45.772     | 45.827     | 45.836     | 45.910     | 0.037           | 0.092           | 0.101           | 0.175           |
| P24      | 46.039        | 46.102     | 46.127     | 46.111     | 46.136     | 0.063           | 0.088           | 0.072           | 0.097           |
| P25      | 45.970        | 46.054     | 46.077     | 46.046     | 46.073     | 0.084           | 0.107           | 0.076           | 0.103           |
| P26      | 45.950        | 45.983     | 46.012     | 45.982     | 46.008     | 0.033           | 0.062           | 0.032           | 0.058           |
| P27      | 45.681        | 45.734     | 45.772     | 45.733     | 45.760     | 0.053           | 0.091           | 0.052           | 0.079           |
| P28      | 45.863        | 45.874     | 45.934     | 45.875     | 45.929     | 0.011           | 0.071           | 0.012           | 0.066           |
| P29      | 45.723        | 45.758     | 45.808     | 45.819     | 45.849     | 0.035           | 0.085           | 0.096           | 0.126           |
| P3       | 45.960        | 46.014     | 46.028     | 46.012     | 46.021     | 0.054           | 0.068           | 0.052           | 0.061           |
| P30      | 45.513        | 45.557     | 45.591     | 45.593     | 45.621     | 0.044           | 0.078           | 0.080           | 0.108           |
| P31      | 45.768        | 45.786     | 45.813     | 45.781     | 45.813     | 0.018           | 0.045           | 0.013           | 0.045           |
| P32      | 45.712        | 45.765     | 45.784     | 45.767     | 45.793     | 0.053           | 0.072           | 0.055           | 0.081           |
| P33      | 45.687        | 45.753     | 45.777     | 45.748     | 45.767     | 0.066           | 0.090           | 0.061           | 0.080           |
| P34      | 45.663        | 45.724     | 45.752     | 45.727     | 45.754     | 0.061           | 0.089           | 0.064           | 0.091           |
| P35      | 45.583        | 45.742     | 45.757     | 45.733     | 45.745     | 0.159           | 0.174           | 0.150           | 0.162           |
| P4       | 45.686        | 45.713     | 45.779     | 45.752     | 45.792     | 0.027           | 0.093           | 0.066           | 0.106           |
| P5       | 45.717        | 45.732     | 45.754     | 45.762     | 45.784     | 0.015           | 0.037           | 0.045           | 0.067           |
| P6       | 45.917        | 45.978     | 45.992     | 45.962     | 45.980     | 0.061           | 0.075           | 0.045           | 0.063           |
| P7       | 46.017        | 46.064     | 46.083     | 46.069     | 46.085     | 0.047           | 0.066           | 0.052           | 0.068           |
| P8       | 46.135        | 46.227     | 46.250     | 46.214     | 46.263     | 0.092           | 0.115           | 0.079           | 0.128           |
| P9       | 46.147        | 46.267     | 46.286     | 46.261     | 46.267     | 0.120           | 0.139           | 0.114           | 0.120           |
| T10      | 46.175        | 46.310     | 46.331     | 46.335     | 46.371     | 0.135           | 0.156           | 0.160           | 0.196           |
| T14      | 45.990        | 46.050     | 46.082     | 46.046     | 46.076     | 0.060           | 0.092           | 0.056           | 0.086           |
| T15      | 45.944        | 45.963     | 45.995     | 45.967     | 45.988     | 0.019           | 0.051           | 0.023           | 0.044           |
| T17      | 46.181        | 46.305     | 46.340     | 46.295     | 46.333     | 0.124           | 0.159           | 0.114           | 0.152           |
| T20      | 45.951        | 45.989     | 46.016     | 45.988     | 46.013     | 0.038           | 0.065           | 0.037           | 0.062           |
| T21      | 45.612        | 45.622     | 45.651     | 45.632     | 45.666     | 0.010           | 0.039           | 0.020           | 0.054           |
| T22      | 45.697        | 45.668     | 45.706     | 45.675     | 45.711     | 0.029           | 0.009           | 0.022           | 0.014           |
| T23      | 45.691        | 45.707     | 45.739     | 45.708     | 45.740     | 0.016           | 0.048           | 0.017           | 0.049           |

|                     |         |        |        |        |        |              |              |              |              |
|---------------------|---------|--------|--------|--------|--------|--------------|--------------|--------------|--------------|
| T24                 | 45.731  | 45.732 | 45.758 | 45.733 | 45.753 | 0.001        | 0.027        | 0.002        | 0.022        |
| T25                 | 45.689  | 45.705 | 45.742 | 45.706 | 45.734 | 0.016        | 0.053        | 0.017        | 0.045        |
| T30                 | 45.966  | 45.991 | 46.010 | 45.995 | 46.017 | 0.025        | 0.044        | 0.029        | 0.051        |
| T35                 | 45.878  | 45.880 | 45.905 | 45.880 | 45.912 | 0.002        | 0.027        | 0.002        | 0.034        |
| T46                 | 46.119  | 46.219 | 46.250 | 46.220 | 46.237 | 0.100        | 0.131        | 0.101        | 0.118        |
| T56                 | 46.1643 | 46.258 | 46.266 | 46.266 | 46.279 | 0.094        | 0.102        | 0.102        | 0.115        |
| T68                 | 46.1587 | 46.271 | 46.288 | 46.26  | 46.273 | 0.112        | 0.129        | 0.101        | 0.114        |
| <b>Average RMSE</b> |         |        |        |        |        | <b>0.140</b> | <b>0.101</b> | <b>0.097</b> | <b>0.099</b> |

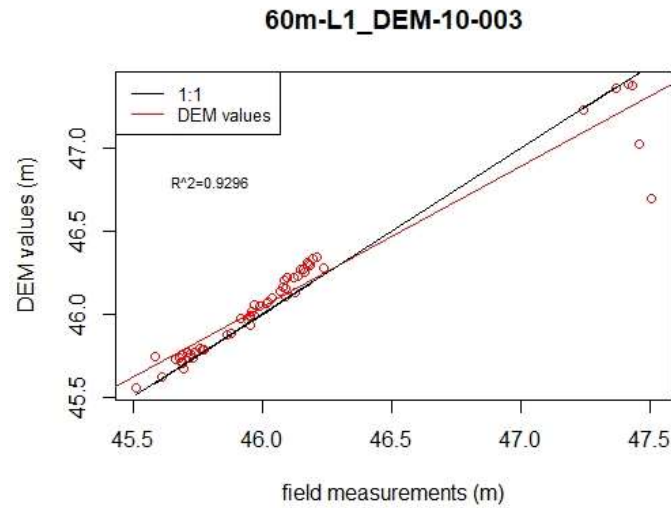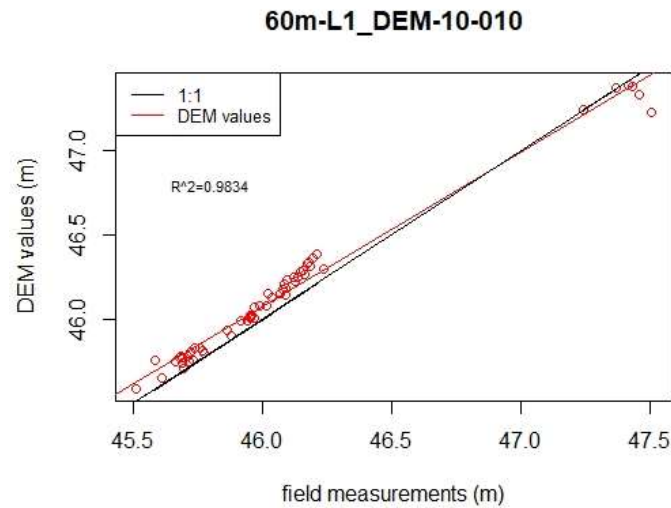

Figure S6. (Continue)

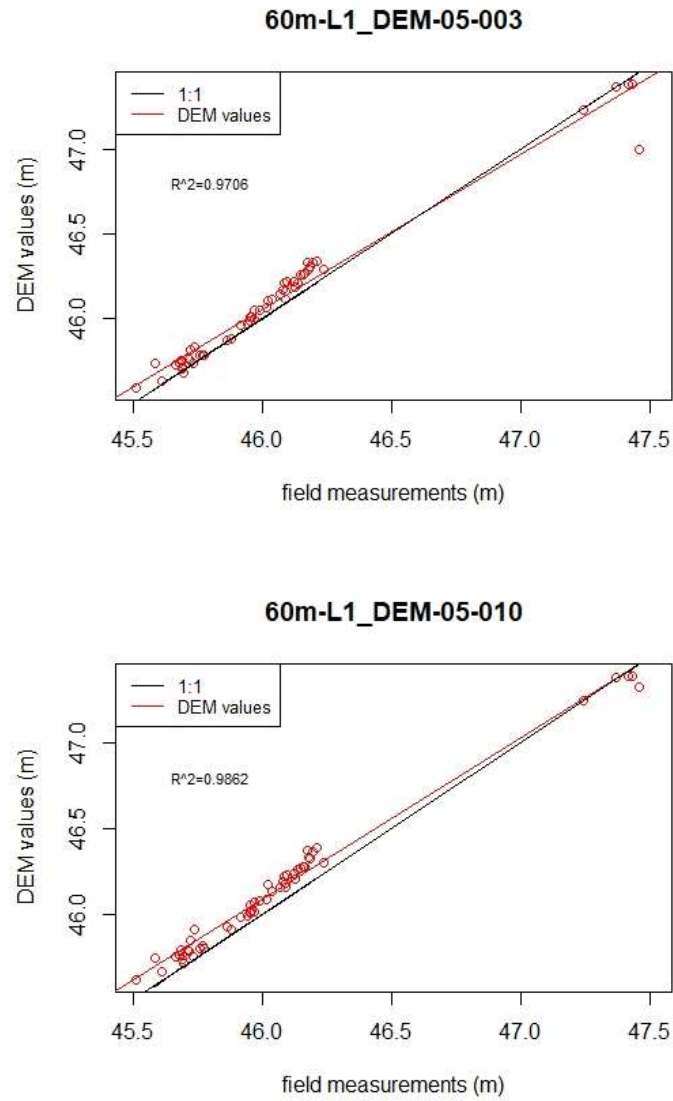

Figure S6. Linear regressions and  $R^2$  values for the four DEMs generated from the L1 flight at 60m compared to GCPs. The red line is the regression line for the compared datasets, the black line represents the 1:1 pattern.

Table S15. Resume of accuracy assessment for DEMs obtained from 60m-L1 mission.

| DEM file        | RMSE  | $R^2$  |
|-----------------|-------|--------|
| DEM_10ps-ng_003 | 0.140 | 0.9296 |
| DEM_10ps-ng_010 | 0.101 | 0.9834 |
| DEM_5ps-ng_003  | 0.097 | 0.9706 |
| DEM_5ps-ng_010  | 0.099 | 0.9862 |

*Table S16. The table resumes technical data for each L1 flight mission, specifying the scan mode employed and the type of flight performed (nadir or oblique); ‘pre\_or\_post’ refers to the flight have been executed previously or posteriorly the operation of vegetation removal for the calibration trial. Size of the LiDAR raw data, the corresponding size of DJI Terra processed point cloud, the number of the images captured by the RGB sensor, and the size of images data are also shown.*

| mission nº | Scan mode | flight  | Pre or post | Flight time (min:sec) | Raw data size_KB | DJI_Terra_processed size_KB | captured images | Image dataset size_KB | notes         |
|------------|-----------|---------|-------------|-----------------------|------------------|-----------------------------|-----------------|-----------------------|---------------|
| 1          | non-rep   | nadir   | pre         | 2:48                  | 266,240          | 414,523                     | 28              | 230,000               |               |
| 2          | rep       | nadir   | pre         | 2:48                  | 266,240          | 429,513                     | 28              | 231,000               |               |
| 3          | non-rep   | oblique | pre         | 18:30                 | 1,996,800        | 3,529,385                   | 139             | 1,120,000             | ppk_processed |
| 4          | rep       | oblique | pre         | 18:30                 | 1,986,560        | 2,567,779                   | 139             | 1,110,000             |               |
| 5          | non-rep   | nadir   | post        | 2:48                  | 266,240          | 408,339                     | 28              | 234,000               |               |
| 6          | rep       | nadir   | post        | 2:48                  | 266,240          | 429,863                     | 29              | 242,000               |               |
| 7          | non-rep   | oblique | post        | 18:30                 | 1,996,800        | 3,136,757                   | 139             | 1,130,000             |               |
| 8          | rep       | oblique | post        | 18:30                 | 1,996,800        | 2,410,236                   | 139             | 1,120,000             |               |

*Table S17. Resume of Pix4Dmapper processing of L1 datasets.*

| mission nº | GSD (cm/pixel) | covered area (ha) | Time for Initial Processing (min:sec) | Time for DSM Generation (h:min:sec) | Time for Orthomosaic Generation (min:sec) | Total Time for Processing (h:min:sec) | Min DSM elevation | Max DSM elevation |
|------------|----------------|-------------------|---------------------------------------|-------------------------------------|-------------------------------------------|---------------------------------------|-------------------|-------------------|
| 1          | 1.67           | 3.47              | 01:18                                 | 00:16:26                            | 03:16s                                    | 00:21:00                              | 43.67             | 49.10             |
| 2          | 1.67           | 2.9               | 01:32                                 | 00:28:11                            | 03:20                                     | 00:33:03                              | 43.48             | 49.22             |
| 3          | 1.93           | 6.55              | 12:11                                 | 13:56:21                            | 11:58                                     | 14:20:30                              | 43.59             | 49.22             |
| 4          | 1.94           | 6.71              | 15:16                                 | 13:05:38                            | 15:27                                     | 13:36:21                              | 43.50             | 49.28             |
| 5          | 1.67           | 3.47              | 01:11                                 | 00:18:52                            | 04:00                                     | 00:24:03                              | 44.31             | 49.11             |
| 6          | 1.67           | 2.9               | 01:12                                 | 00:29:56                            | 03:18                                     | 00:34:26                              | 44.43             | 49.22             |
| 7          | 1.93           | 5.75              | 08:07                                 | 10:58:31                            | 10:57                                     | 11:17:35                              | 44.41             | 49.08             |
| 8          | 2              | 4.37              | 06:59                                 | 17:17:46                            | 10:17                                     | 17:35:02                              | 44.82             | 49.08             |

*Table S18. Technical information about all LiDAR point clouds before and after LiDAR processing filtration and edition operations.*

| mission | Raw LiDAR data size | DJI Terra-processed data size | Pre-filtering LiDAR point count | Post-filtering LiDAR point count | Counts decrease (%) | Filtered point cloud density (p/m <sup>2</sup> ) | Filtered point cloud point spacing | Filtered point cloud area (m <sup>2</sup> ) |
|---------|---------------------|-------------------------------|---------------------------------|----------------------------------|---------------------|--------------------------------------------------|------------------------------------|---------------------------------------------|
| 100m-L1 | 2.5 GB              | 4.53 GB                       | 143,362,487                     | 88,707,471                       | 38.1                | 332.89                                           | 0.06                               | -                                           |
| 60m-L1  | 3.7 GB              | 7.65 GB                       | 241,640,221                     | 145,790,716                      | 39.7                | 1,448.5                                          | 0.03                               | -                                           |
| 1       | 270 MB              | 415 MB                        | 12,484,405                      | 10,344,830                       | 17.1                | 341.73                                           | 0.05                               | 30,272                                      |
| 2       | 270 MB              | 430 MB                        | 12,935,432                      | 7,417,902                        | 42.7                | 320.73                                           | 0.06                               | 23,128                                      |
| 3       | 1.99 GB             | 3.5 GB                        | 106,296,732                     | 89,522,151                       | 15.8                | 1,140.18                                         | 0.03                               | 78,516                                      |
| 4       | 1.99 GB             | 2.6 GB                        | 77,334,335                      | 46,694,706                       | 39.6                | 1,414.65                                         | 0.03                               | 33,008                                      |
| 5       | 270 MB              | 410 MB                        | 12,298,171                      | 10,209,588                       | 17.0                | 341.41                                           | 0.05                               | 29,904                                      |
| 6       | 270 MB              | 430 MB                        | 12,946,413                      | 7,516,053                        | 41.9                | 322.13                                           | 0.06                               | 23,332                                      |
| 7       | 1.99 GB             | 3.2 GB                        | 94,471,681                      | 80,659,719                       | 14.6                | 1,207.41                                         | 0.03                               | 66,804                                      |
| 8       | 1.99 GB             | 2.4 GB                        | 72,590,587                      | 46,017,456                       | 36.6                | 1,497.38                                         | 0.03                               | 30,732                                      |

Table S19. Coverage area values for vegetation and bare ground for each mission based on the NDVI masks (excluding water surfaces).

| mission | Vegetation (%) | Bare ground (%) |
|---------|----------------|-----------------|
| 1       | 50.50          | 49.50           |
| 2       | 44.24          | 55.76           |
| 3       | 30.37          | 69.63           |
| 4       | 32.79          | 67.21           |
| 5       | 39.49          | 60.51           |
| 6       | 45.85          | 54.15           |
| 7       | 30.37          | 69.63           |
| 8       | 32.33          | 67.67           |

Table S20. Statistics for classification of mission 1 data by setting 0.10 m (ng\_010) as threshold for non-ground points in the auto- classification algorithm.

| Classification (mission 1_ng010) | Point Count | %     | Z Min | Z Max |
|----------------------------------|-------------|-------|-------|-------|
| 0 - Created, never classified    | 3,267,185   | 31.92 | 43.65 | 49.42 |
| 2 - Ground                       | 6,947,664   | 67.89 | 43.54 | 47.81 |
| 7 - Low Point (Noise)            | 18,116      | 0.18  | 43.51 | 47.33 |
| 18 - High Point (Noise)          | 976         | 0.01  | 44.35 | 97.86 |

Table S21. Statistics for classification of mission 1 data by setting 0.003 m (ng\_003) as threshold for non-ground points in the auto- classification algorithm.

| Classification (mission 1_ng003) | Point Count | %     | Z Min | Z Max |
|----------------------------------|-------------|-------|-------|-------|
| 0 - Created, never classified    | 9,644,274   | 94.24 | 43.65 | 49.42 |
| 2 - Ground                       | 570,575     | 5.58  | 43.54 | 47.81 |
| 7 - Low Point (Noise)            | 18,116      | 0.18  | 43.51 | 47.33 |
| 18 - High Point (Noise)          | 976         | 0.01  | 44.35 | 97.86 |

Table S22. Statistics for classification of mission 2 data by setting 0.10 m (ng\_010) as threshold for non-ground points in the auto- classification algorithm.

| Classification (mission 2_ng010) | Point Count | %     | Z Min | Z Max |
|----------------------------------|-------------|-------|-------|-------|
| 0 - Created, never classified    | 951,092     | 12.96 | 43.73 | 49.48 |
| 2 - Ground                       | 6,372,931   | 86.86 | 43.60 | 47.82 |
| 7 - Low Point (Noise)            | 9,709       | 0.13  | 43.59 | 47.35 |
| 18 - High Point (Noise)          | 3,580       | 0.05  | 44.23 | 49.05 |

Table S23. Statistics for classification of mission 2 data by setting 0.003 m (ng\_003) as threshold for non-ground points in the auto- classification algorithm.

| Classification (mission 2_ng003) | Point Count | %     | Z Min | Z Max |
|----------------------------------|-------------|-------|-------|-------|
| 0 - Created, never classified    | 5,584,088   | 76.11 | 43.73 | 49.48 |
| 2 - Ground                       | 1,739,935   | 23.71 | 43.60 | 47.82 |
| 7 - Low Point (Noise)            | 9,709       | 0.13  | 43.59 | 47.35 |
| 18 - High Point (Noise)          | 3,580       | 0.05  | 44.23 | 49.05 |

Table S24. Statistics for classification of mission 3 data by setting 0.10 m (ng\_010) as threshold for non-ground points in the auto- classification algorithm.

| Classification (mission 3_ng010) | Point Count | %     | Z Min | Z Max |
|----------------------------------|-------------|-------|-------|-------|
| 0 - Created, never classified    | 32,782,051  | 39.63 | 43.48 | 49.50 |
| 2 - Ground                       | 48,845,326  | 59.02 | 43.38 | 47.76 |
| 7 - Low Point (Noise)            | 698,984     | 0.85  | 43.16 | 47.45 |
| 18 - High Point (Noise)          | 8,498       | 0.01  | 43.87 | 49.50 |

Table S25. Statistics for classification of mission 3 data by setting 0.003 m (ng\_003) as threshold for non-ground points in the auto- classification algorithm.

| Classification (mission 3_ng003) | Point Count | %     | Z Min | Z Max |
|----------------------------------|-------------|-------|-------|-------|
| 0 - Created, never classified    | 77,696,357  | 93.94 | 43.48 | 49.50 |
| 2 - Ground                       | 3,931,020   | 4.75  | 43.38 | 47.76 |
| 7 - Low Point (Noise)            | 698,984     | 0.85  | 43.16 | 47.45 |
| 18 - High Point (Noise)          | 8,498       | 0.01  | 43.87 | 49.50 |

Table S26. Statistics for classification of mission 4 data by setting 0.10 m (ng\_010) as threshold for non-ground points in the auto- classification algorithm.

| Classification (mission 4_ng010) | Point Count | %     | Z Min | Z Max |
|----------------------------------|-------------|-------|-------|-------|
| 0 - Created, never classified    | 3,560,467   | 7.66  | 43.68 | 49.53 |
| 2 - Ground                       | 4,2760,231  | 92.04 | 43.56 | 47.86 |
| 7 - Low Point (Noise)            | 104,768     | 0.23  | 43.47 | 47.25 |
| 18 - High Point (Noise)          | 31,197      | 0.07  | 43.92 | 49.35 |

Table S27. Statistics for classification of mission 4 data by setting 0.003 m (ng\_003) as threshold for non-ground points in the auto- classification algorithm.

| Classification (mission 4_ng003) | Point Count | %     | Z Min | Z Max |
|----------------------------------|-------------|-------|-------|-------|
| 0 - Created, never classified    | 3,7405,142  | 80.52 | 43.68 | 49.53 |
| 2 - Ground                       | 8,915,556   | 19.19 | 43.56 | 47.86 |
| 7 - Low Point (Noise)            | 104,768     | 0.23  | 43.47 | 47.25 |
| 18 - High Point (Noise)          | 31,197      | 0.07  | 43.92 | 49.35 |

Table S28. Statistics for classification of mission 5 data by setting 0.010 m (ng\_010) as threshold for non-ground points in the auto- classification algorithm.

| Classification (mission 5_ng010) | Point Count | %     | Z Min | Z Max |
|----------------------------------|-------------|-------|-------|-------|
| 0 - Created, never classified    | 4,207,460   | 41.69 | 44.20 | 49.39 |
| 2 - Ground                       | 5,855,469   | 58.03 | 44.16 | 47.70 |
| 7 - Low Point (Noise)            | 27.150      | 0.27  | 26.11 | 47.35 |
| 18 - High Point (Noise)          | 1,196       | 0.01  | 44.55 | 49.56 |

Table S29. Statistics for classification of mission 5 data by setting 0.003 m (ng\_003) as threshold for non-ground points in the auto- classification algorithm.

| Classification (mission 5_ng003) | Point Count | %     | Z Min | Z Max |
|----------------------------------|-------------|-------|-------|-------|
| 0 - Created, never classified    | 9,557,012   | 94.71 | 44.20 | 49.39 |
| 2 - Ground                       | 505,917     | 5.01  | 44.16 | 47.70 |
| 7 - Low Point (Noise)            | 27,150      | 0.27  | 26.11 | 47.35 |
| 18 - High Point (Noise)          | 1,196       | 0.01  | 44.55 | 49.56 |

Table S30. Statistics for classification of mission 6 data by setting 0.010 m (ng\_010) as threshold for non-ground points in the auto- classification algorithm.

| Classification (mission 6_ng010) | Point Count | %     | Z Min | Z Max |
|----------------------------------|-------------|-------|-------|-------|
| 0 - Created, never classified    | 1,038,020   | 14.20 | 44.37 | 49.47 |
| 2 - Ground                       | 6,260,660   | 85.65 | 44.25 | 47.83 |
| 7 - Low Point (Noise)            | 7,859       | 0.11  | 44.20 | 47.34 |
| 18 - High Point (Noise)          | 3,285       | 0.04  | 44.74 | 49.42 |

Table S31. Statistics for classification of mission 6 data by setting 0.003 m (ng\_003) as threshold for non-ground points in the auto- classification algorithm.

| Classification (mission 6_ng003) | Point Count | %     | Z Min | Z Max |
|----------------------------------|-------------|-------|-------|-------|
| 0 - Created, never classified    | 5,678,434   | 77.68 | 44.37 | 49.47 |
| 2 - Ground                       | 1,620,246   | 22.17 | 44.25 | 47.83 |
| 7 - Low Point (Noise)            | 7,859       | 0.11  | 44.20 | 47.34 |
| 18 - High Point (Noise)          | 3,285       | 0.04  | 44.74 | 49.42 |

Table S32. Statistics for classification of mission 7 data by setting 0.010 m (ng\_010) as threshold for non-ground points in the auto- classification algorithm.

| Classification (mission 7_ng010) | Point Count | %     | Z Min | Z Max |
|----------------------------------|-------------|-------|-------|-------|
| 0 - Created, never classified    | 29,667,005  | 39.37 | 44.30 | 49.45 |
| 2 - Ground                       | 45,120,656  | 59.88 | 44.26 | 47.78 |
| 7 - Low Point (Noise)            | 538,885     | 0.72  | 44.15 | 47.49 |
| 18 - High Point (Noise)          | 27,388      | 0.04  | 44.65 | 49.47 |

Table S33. Statistics for classification of mission 7 data by setting 0.003 m (ng\_003) as threshold for non-ground points in the auto- classification algorithm.

| Classification (mission 7_ng003) | Point Count | %     | Z Min | Z Max |
|----------------------------------|-------------|-------|-------|-------|
| 0 - Created, never classified    | 70,978,799  | 94.19 | 44.30 | 49.45 |
| 2 - Ground                       | 3,808,862   | 5.05  | 44.26 | 47.78 |
| 7 - Low Point (Noise)            | 538,885     | 0.72  | 44.15 | 47.49 |
| 18 - High Point (Noise)          | 27,388      | 0.04  | 44.65 | 49.47 |

Table S34. Statistics for classification of mission 8 data by setting 0.010 m (ng\_010) as threshold for non-ground points in the auto- classification algorithm.

| Classification (mission 8_ng010) | Point Count | %     | Z Min | Z Max |
|----------------------------------|-------------|-------|-------|-------|
| 0 - Created, never classified    | 7,971,774   | 17.48 | 44.73 | 49.48 |
| 2 - Ground                       | 37,475,999  | 82.20 | 44.49 | 47.81 |
| 7 - Low Point (Noise)            | 98,799      | 0.22  | 44.48 | 47.68 |
| 18 - High Point (Noise)          | 45,601      | 0.10  | 44.98 | 94.81 |

Table S35. Statistics for classification of mission 8 data by setting 0.003 m (ng\_003) as threshold for non-ground points in the auto- classification algorithm.

| Classification (mission 8_ng003) | Point Count | %     | Z Min | Z Max |
|----------------------------------|-------------|-------|-------|-------|
| 0 - Created, never classified    | 39,970,300  | 87.67 | 44.73 | 49.48 |
| 2 - Ground                       | 5,477,473   | 12.01 | 44.49 | 47.81 |
| 7 - Low Point (Noise)            | 98,799      | 0.22  | 44.48 | 47.68 |
| 18 - High Point (Noise)          | 45,601      | 0.10  | 44.98 | 94.81 |

Table S36. Classification statistic for mission 1 after the application multispectral masks.

| Classification (mission 1)    | Point Count | %     | Z Min | Z Max |
|-------------------------------|-------------|-------|-------|-------|
| 0 - Created, never classified | 5,441,058   | 53.17 | 43.65 | 49.42 |
| 2 - Ground                    | 4,773,791   | 46.65 | 43.54 | 47.81 |
| 7 - Low Point (Noise)         | 18,116      | 0.18  | 43.51 | 47.33 |
| 18 - High Point (Noise)       | 976         | 0.01  | 44.35 | 97.86 |

Table S37. Classification statistic for mission 2 after the application multispectral masks.

| Classification (mission 2)    | Point Count | %     | Z Min | Z Max |
|-------------------------------|-------------|-------|-------|-------|
| 0 - Created, never classified | 3,352,901   | 45.70 | 43.73 | 49.48 |
| 2 - Ground                    | 3,971,122   | 54.12 | 43.60 | 47.82 |
| 7 - Low Point (Noise)         | 9,709       | 0.13  | 43.59 | 47.35 |
| 18 - High Point (Noise)       | 3,580       | 0.05  | 44.23 | 49.05 |

Table S38. Classification statistic for mission 3 after the application multispectral masks.

| Classification (mission 3)    | Point Count | %     | Z Min | Z Max |
|-------------------------------|-------------|-------|-------|-------|
| 0 - Created, never classified | 25,643,315  | 31.00 | 43.48 | 49.50 |
| 2 - Ground                    | 56,361,692  | 68.14 | 43.38 | 47.76 |
| 7 - Low Point (Noise)         | 698,984     | 0.85  | 43.16 | 47.45 |
| 18 - High Point (Noise)       | 8,498       | 0.01  | 43.87 | 49.50 |

Table S39. Classification statistic for mission 4 after the application multispectral masks.

| Classification (mission 4)    | Point Count | %     | Z Min | Z Max |
|-------------------------------|-------------|-------|-------|-------|
| 0 - Created, never classified | 14,845,864  | 31.96 | 43.68 | 49.53 |

|                         |            |       |       |       |
|-------------------------|------------|-------|-------|-------|
| 2 - Ground              | 31,474,834 | 67.75 | 43.56 | 47.86 |
| 7 - Low Point (Noise)   | 104,768    | 0.23  | 43.47 | 47.25 |
| 18 - High Point (Noise) | 31,197     | 0.07  | 43.92 | 49.35 |

*Table S40. Classification statistic for mission 5 after the application multispectral masks.*

| Classification (mission 5)    | Point Count | %     | Z Min | Z Max |
|-------------------------------|-------------|-------|-------|-------|
| 0 - Created, never classified | 5,597,932   | 55.47 | 44.20 | 49.39 |
| 2 - Ground                    | 4,464,997   | 44.25 | 44.16 | 47.70 |
| 7 - Low Point (Noise)         | 27,150      | 0.27  | 26.11 | 47.35 |
| 18 - High Point (Noise)       | 1,196       | 0.01  | 44.55 | 49.56 |

*Table S41. Classification statistic for mission 6 after the application multispectral masks.*

| Classification (mission 6)    | Point Count | %     | Z Min | Z Max |
|-------------------------------|-------------|-------|-------|-------|
| 0 - Created, never classified | 3,422,898   | 46.83 | 44.37 | 49.47 |
| 2 - Ground                    | 3,875,782   | 53.02 | 44.25 | 47.83 |
| 7 - Low Point (Noise)         | 7,859       | 0.11  | 44.20 | 47.34 |
| 18 - High Point (Noise)       | 3,285       | 0.04  | 44.74 | 49.42 |

*Table S42. Classification statistic for mission 7 after the application multispectral masks.*

| Classification (mission 7)    | Point Count | %     | Z Min | Z Max |
|-------------------------------|-------------|-------|-------|-------|
| 0 - Created, never classified | 24,738,268  | 32.83 | 44.30 | 49.45 |
| 2 - Ground                    | 50,049,393  | 66.42 | 44.26 | 47.78 |
| 7 - Low Point (Noise)         | 538,885     | 0.72  | 44.15 | 47.49 |
| 18 - High Point (Noise)       | 27,388      | 0.04  | 44.65 | 49.47 |

*Table S43. Classification statistic for mission 8 after the application multispectral masks.*

| Classification (mission 8)    | Point Count | %     | Z Min | Z Max |
|-------------------------------|-------------|-------|-------|-------|
| 0 - Created, never classified | 21,673,148  | 47.54 | 44.73 | 49.48 |
| 2 - Ground                    | 23,774,614  | 52.15 | 44.49 | 47.81 |
| 7 - Low Point (Noise)         | 98,799      | 0.22  | 44.48 | 47.68 |
| 18 - High Point (Noise)       | 45,601      | 0.10  | 44.98 | 49.81 |

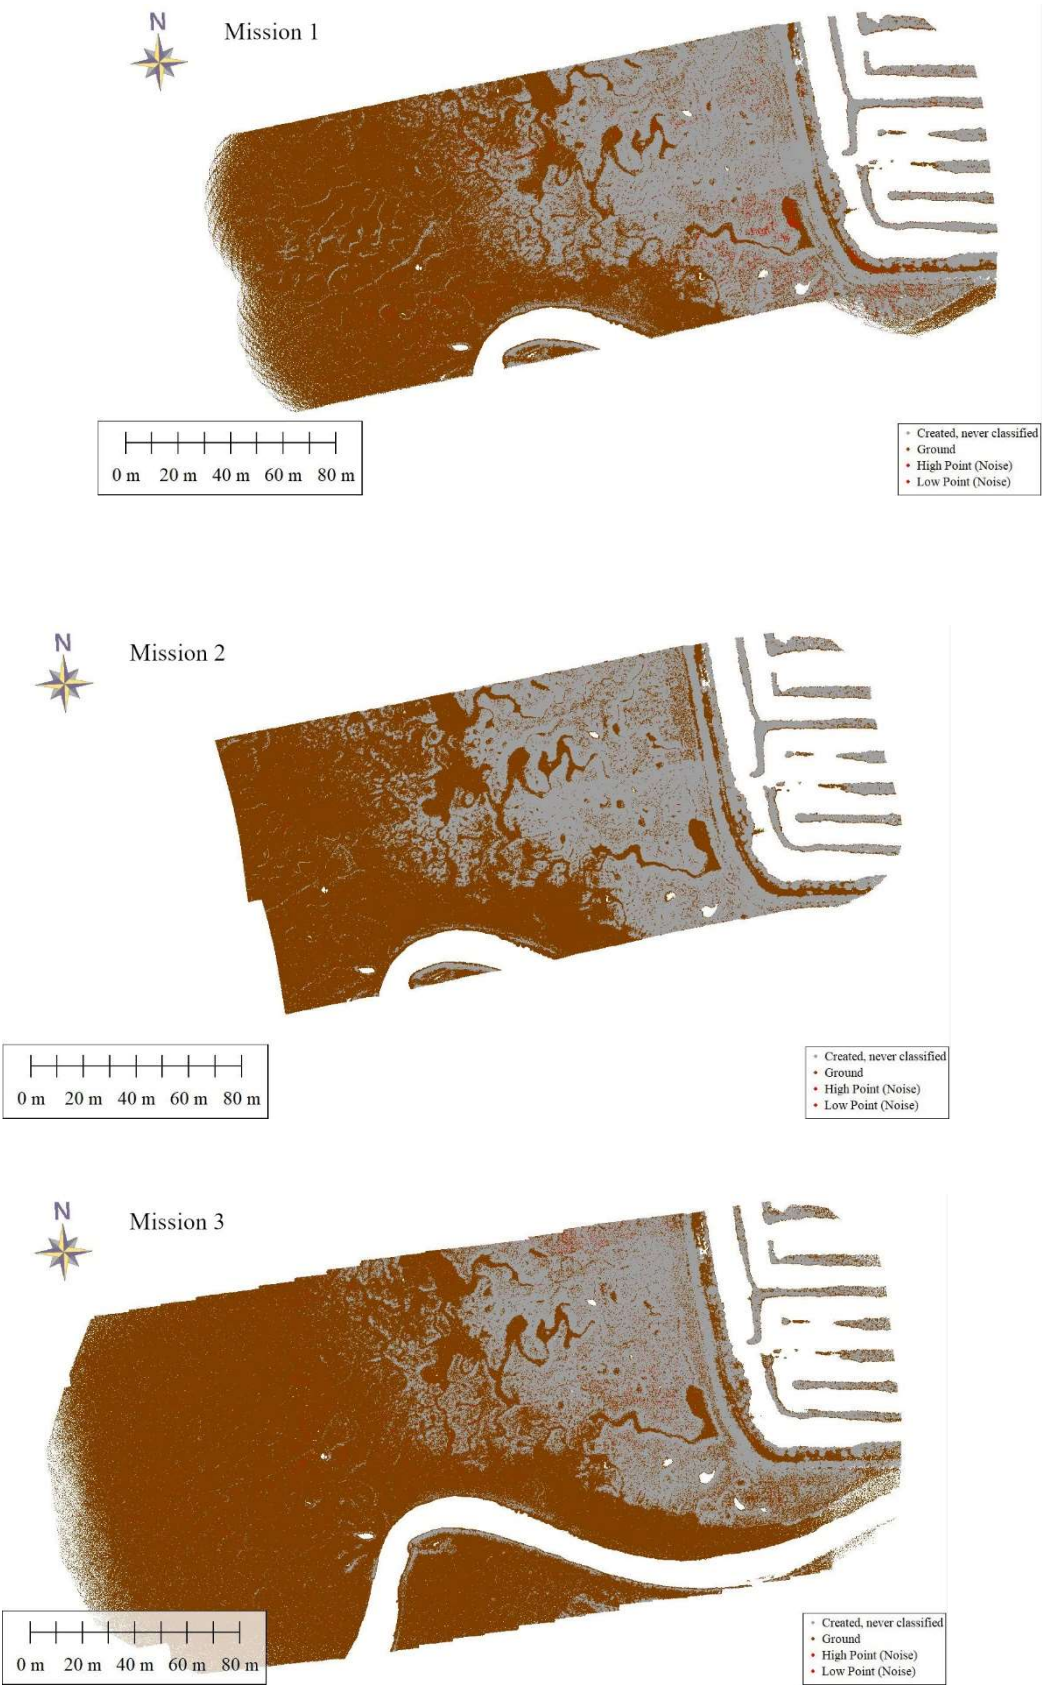

Figure S7. (Continue)

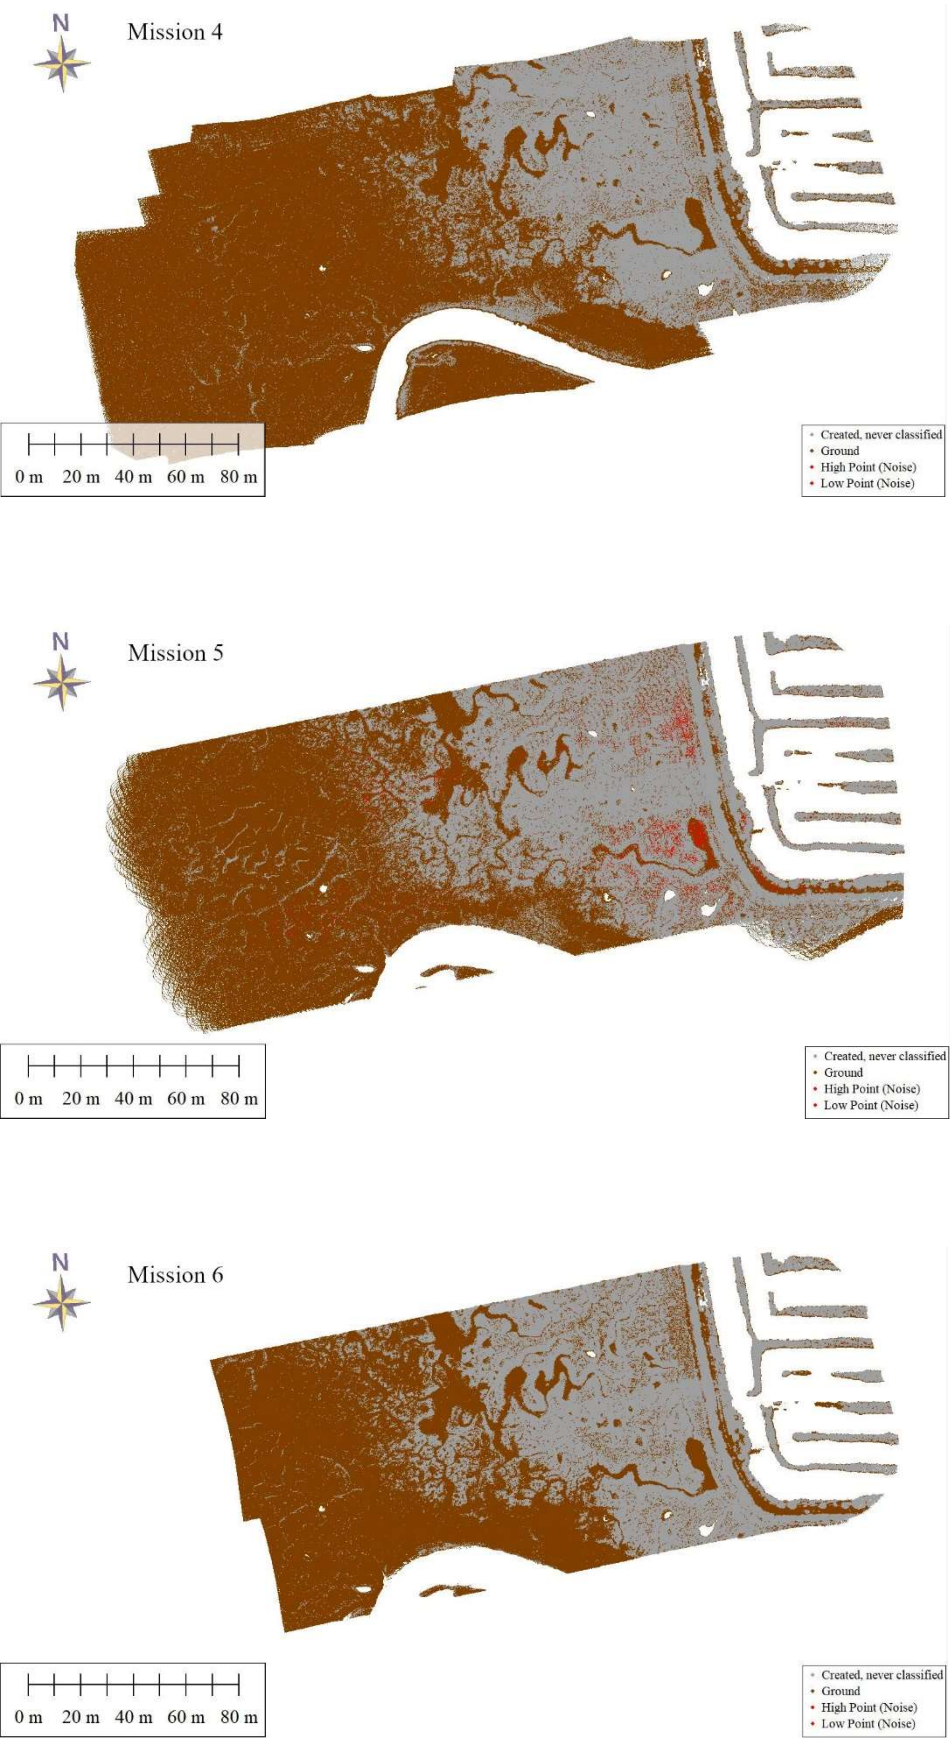

Figure S7. (Continue)

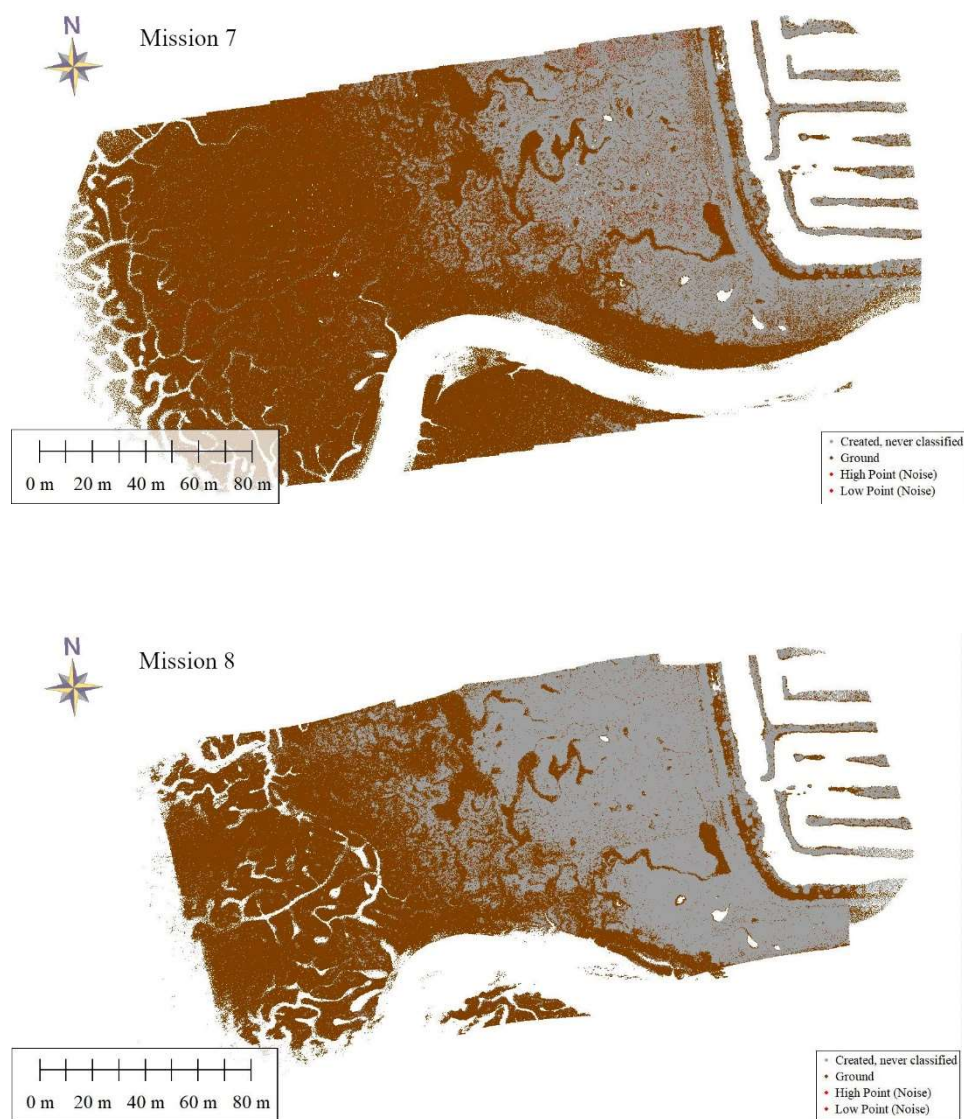

Figure S7. Classification results for the distinct missions after the application multispectral masks.

Table S44. Characteristics of the digital models obtained through LiDAR processing are resumed in the following table:

**DSMs**

| Mission nº | File name  | Point spacing | Resolution (m) | Z Min (m) | Z Max (m) | Elevation range (m) |
|------------|------------|---------------|----------------|-----------|-----------|---------------------|
| 1          | 01_DSM_1ps | 1             | 0.05           | 43.68     | 49.26     | 5.58                |
|            | 01_DSM_3ps | 3             | 0.14           | 43.64     | 49.19     | 5.55                |
|            | 01_DSM_5ps | 5             | 0.24           | 43.68     | 49.19     | 5.51                |
| 2          | 02_DSM_1ps | 1             | 0.05           | 43.71     | 49.12     | 5.41                |
|            | 02_DSM_3ps | 3             | 0.15           | 43.69     | 49.18     | 5.49                |
|            | 02_DSM_5ps | 5             | 0.25           | 43.73     | 49.43     | 5.7                 |
| 3          | 03_DSM_1ps | 1             | 0.02           | 43.53     | 49.37     | 5.84                |
|            | 03_DSM_3ps | 3             | 0.06           | 43.60     | 49.12     | 5.52                |
|            | 03_DSM_5ps | 5             | 0.09           | 43.60     | 49.23     | 5.63                |
| 4          | 04_DSM_1ps | 1             | 0.02           | 43.65     | 49.08     | 5.43                |
|            | 04_DSM_3ps | 3             | 0.07           | 43.69     | 49.41     | 5.72                |
|            | 04_DSM_5ps | 5             | 0.12           | 43.73     | 49.39     | 5.66                |
| 5          | 05_DSM_1ps | 1             | 0.05           | 44.13     | 49.18     | 5.05                |
|            | 05_DSM_3ps | 3             | 0.14           | 44.30     | 49.22     | 4.92                |
|            | 05_DSM_5ps | 5             | 0.24           | 44.25     | 49.19     | 4.94                |
| 6          | 06_DSM_1ps | 1             | 0.05           | 44.36     | 49.14     | 4.78                |
|            | 06_DSM_3ps | 3             | 0.15           | 44.31     | 49.15     | 4.84                |
|            | 06_DSM_5ps | 5             | 0.26           | 44.47     | 49.32     | 4.85                |
| 7          | 07_DSM_1ps | 1             | 0.02           | 44.33     | 49.12     | 4.79                |
|            | 07_DSM_3ps | 3             | 0.06           | 44.32     | 49.20     | 4.88                |
|            | 07_DSM_5ps | 5             | 0.09           | 44.33     | 49.10     | 4.77                |
| 8          | 08_DSM_1ps | 1             | 0.02           | 44.69     | 49.32     | 4.63                |
|            | 08_DSM_3ps | 3             | 0.07           | 44.75     | 49.44     | 4.69                |
|            | 08_DSM_5ps | 5             | 0.12           | 44.77     | 49.21     | 4.44                |

**DEMs**

| Mission nº | File name   | Point spacing | Resolution (m) | Z Min (m) | Z Max (m) | Elevation range (m) |
|------------|-------------|---------------|----------------|-----------|-----------|---------------------|
| 1          | 01_DEM_5ps  | 5             | 0.24           | 43.67     | 47.56     | 3.89                |
|            | 01_DEM_10ps | 10            | 0.47           | 43.60     | 47.59     | 3.99                |
|            | 01_DEM_15ps | 15            | 0.70           | 43.58     | 48.97     | 5.39                |
| 2          | 02_DEM_5ps  | 5             | 0.25           | 43.72     | 47.67     | 3.95                |
|            | 02_DEM_10ps | 10            | 0.51           | 43.71     | 47.70     | 3.99                |
|            | 02_DEM_15ps | 15            | 0.76           | 43.61     | 48.62     | 5.01                |
| 3          | 03_DEM_5ps  | 5             | 0.09           | 43.60     | 47.71     | 4.11                |
|            | 03_DEM_10ps | 10            | 0.18           | 43.63     | 47.68     | 4.05                |
|            | 03_DEM_15ps | 15            | 0.28           | 43.42     | 48.42     | 5                   |
| 4          | 04_DEM_5ps  | 5             | 0.12           | 43.73     | 47.68     | 3.95                |
|            | 04_DEM_10ps | 10            | 0.24           | 43.70     | 47.75     | 4.05                |
|            | 04_DEM_15ps | 15            | 0.37           | 43.58     | 48.99     | 5.41                |
| 5          | 05_DEM_5ps  | 5             | 0.24           | 44.25     | 47.59     | 3.34                |
|            | 05_DEM_10ps | 10            | 0.47           | 44.27     | 47.58     | 3.31                |
|            | 05_DEM_15ps | 15            | 0.71           | 44.17     | 48.75     | 4.58                |
| 6          | 06_DEM_5ps  | 5             | 0.26           | 44.39     | 47.74     | 3.35                |
|            | 06_DEM_10ps | 10            | 0.51           | 44.35     | 47.80     | 3.45                |
|            | 06_DEM_15ps | 15            | 0.77           | 44.29     | 49.04     | 4.75                |
| 7          | 07_DEM_5ps  | 5             | 0.09           | 44.33     | 47.73     | 3.4                 |
|            | 07_DEM_10ps | 10            | 0.19           | 44.43     | 47.71     | 3.28                |
|            | 07_DEM_15ps | 15            | 0.28           | 44.33     | 48.48     | 4.15                |

|   |             |    |      |       |       |      |
|---|-------------|----|------|-------|-------|------|
| 8 | 08_DEM_5ps  | 5  | 0.12 | 44.76 | 47.77 | 3.01 |
|   | 08_DEM_10ps | 10 | 0.24 | 44.56 | 47.72 | 3.16 |
|   | 08_DEM_15ps | 15 | 0.37 | 44.53 | 49.03 | 4.5  |

Table S45 – Resume of resolution of digital models from LiDAR processing. ps: point spacing. Data expressed in m/pixel.

| Mission dataset | DSM grid spacing |      |      | DEM grid spacing |       |       |
|-----------------|------------------|------|------|------------------|-------|-------|
|                 | 1-ps             | 3-ps | 5-ps | 5-ps             | 10-ps | 15-ps |
| 100m-LI         | 0.05             | -    | -    | 0.27             | 0.55  | -     |
| 60m-LI          | 0.03             | -    | -    | 0.13             | 0.26  | -     |
| 1 and 5         | 0.05             | 0.14 | 0.24 | 0.24             | 0.47  | 0.70  |
| 2 and 6         | 0.05             | 0.15 | 0.25 | 0.25             | 0.51  | 0.76  |
| 3 and 7         | 0.02             | 0.06 | 0.09 | 0.09             | 0.18  | 0.28  |
| 4 and 8         | 0.02             | 0.07 | 0.12 | 0.12             | 0.24  | 0.37  |

Table S46. Quality check for point cloud from mission 1 (nadir flight, non-repetitive scan mode). Elevation values for GCPs (Point elevation), species of vegetation identified at each point, elevation values of the corresponding point from the LiDAR point cloud (LiDAR elevation), and RMSE value at each point. Elevation values are expressed in ellipsoidal height.

| Point ID | species                | Point elevation (m) | LiDAR elevation (m) | RMSE (m) |
|----------|------------------------|---------------------|---------------------|----------|
| R51      | Salicornia             | 46.001              | 46.277              | 0.276    |
| R15      | Sarcocornia+Sporobolus | 46.175              | 46.365              | 0.19     |
| R13      | Sarcocornia            | 46.059              | 46.227              | 0.168    |
| R20      | Sarcocornia            | 46.152              | 46.318              | 0.166    |
| B3       | Sarcocornia            | 46.17               | 46.325              | 0.155    |
| R22      | Sarcocornia            | 46.121              | 46.276              | 0.155    |
| R30      | Sarcocornia            | 46.142              | 46.296              | 0.154    |
| R38      | Sarcocornia            | 45.952              | 46.1                | 0.148    |
| R54      | Sarcocornia            | 45.918              | 46.064              | 0.146    |
| R35      | Sarcocornia            | 45.995              | 46.139              | 0.144    |
| R45      | Sarcocornia            | 46.082              | 46.223              | 0.141    |
| R42      | Sarcocornia            | 46.151              | 46.289              | 0.138    |
| R3       | Salicornia             | 46.118              | 46.255              | 0.137    |
| R31      | Sarcocornia            | 46.189              | 46.325              | 0.136    |
| R36      | Sarcocornia            | 46.1                | 46.236              | 0.136    |
| R25      | Sarcocornia            | 46.159              | 46.285              | 0.126    |
| R34      | Sarcocornia            | 46.171              | 46.296              | 0.125    |
| R16      | Sarcocornia            | 46.205              | 46.327              | 0.122    |
| R43      | Sarcocornia+Sporobolus | 46.136              | 46.257              | 0.121    |
| R11      | Salicornia             | 46.064              | 46.183              | 0.119    |
| R29      | Sarcocornia            | 46.176              | 46.294              | 0.118    |
| R18      | Sarcocornia            | 46.213              | 46.33               | 0.117    |
| R39      | Sarcocornia            | 46.115              | 46.226              | 0.111    |
| R53      | Sarcocornia            | 46.071              | 46.181              | 0.11     |
| R19      | Sarcocornia            | 46.135              | 46.244              | 0.109    |
| C2       | peeling                | 46.208              | 46.314              | 0.106    |
| R27      | Sarcocornia            | 46.131              | 46.237              | 0.106    |
| C4       | peeling                | 46.049              | 46.154              | 0.105    |
| R14      | Sarcocornia            | 46.172              | 46.277              | 0.105    |
| R21      | Sarcocornia            | 46.161              | 46.266              | 0.105    |
| R41      | Sarcocornia            | 46.116              | 46.221              | 0.105    |
| R28      | Sarcocornia            | 46.145              | 46.249              | 0.104    |
| R44      | Sarcocornia            | 46.078              | 46.182              | 0.104    |
| R46      | Salicornia             | 46.091              | 46.194              | 0.103    |
| R24      | Sarcocornia            | 46.052              | 46.153              | 0.101    |

|                  |             |        |        |              |
|------------------|-------------|--------|--------|--------------|
| R47              | Salicornia  | 46.013 | 46.111 | 0.098        |
| R23              | Sarcocornia | 46.093 | 46.189 | 0.096        |
| R12              | Salicornia  | 46.128 | 46.223 | 0.095        |
| R26              | Sarcocornia | 46.145 | 46.24  | 0.095        |
| R55              | Sarcocornia | 45.98  | 46.073 | 0.093        |
| R7               | Salicornia  | 46.089 | 46.182 | 0.093        |
| R52              | Salicornia  | 45.958 | 46.05  | 0.092        |
| R6               | Salicornia  | 46.114 | 46.203 | 0.089        |
| C1               | peeling     | 46.211 | 46.297 | 0.086        |
| R32              | Sarcocornia | 46.193 | 46.278 | 0.085        |
| R10              | Salicornia  | 46.115 | 46.199 | 0.084        |
| R56              | Sarcocornia | 45.848 | 45.931 | 0.083        |
| R17              | Sarcocornia | 46.191 | 46.273 | 0.082        |
| R50              | Salicornia  | 46.037 | 46.115 | 0.078        |
| R40              | Sarcocornia | 46.111 | 46.185 | 0.074        |
| R37              | Sarcocornia | 45.994 | 46.066 | 0.072        |
| R8               | Salicornia  | 46.09  | 46.157 | 0.067        |
| R33              | Sarcocornia | 46.148 | 46.213 | 0.065        |
| R9               | Salicornia  | 46.054 | 46.118 | 0.064        |
| C3               | peeling     | 46.109 | 46.17  | 0.061        |
| R48              | Salicornia  | 45.937 | 45.993 | 0.056        |
| R4               | Salicornia  | 46.136 | 46.19  | 0.054        |
| R5               | Salicornia  | 46.114 | 46.168 | 0.054        |
| R2               | Salicornia  | 46.18  | 46.221 | 0.041        |
| R49              | Salicornia  | 45.917 | 45.947 | 0.03         |
| R1               | base        | 47.452 | 47.439 | 0.013        |
| <b>Mean RMSE</b> |             |        |        | <b>0.114</b> |

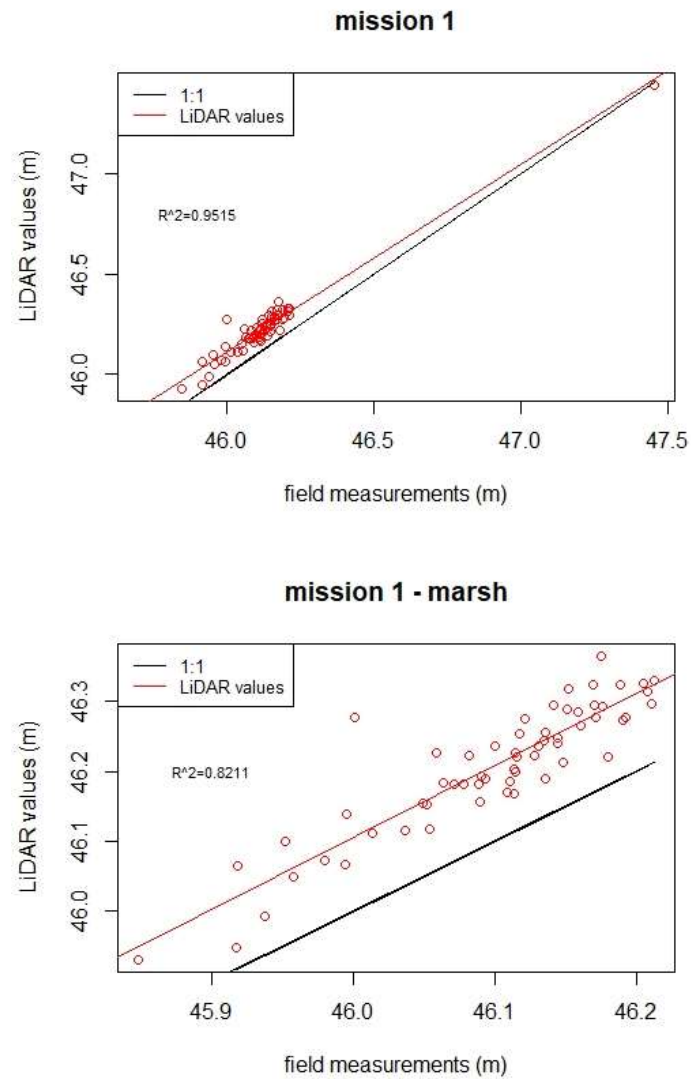

Figure S8. Linear regression and  $R^2$  value for point cloud values from mission 1 compared to GCPs. Upper graph plots all points, while lower graph shows the existing relationship by using only the points situated on the marsh surface. The red line is the regression line for the compared datasets, the black line represents the 1:1 pattern.

Table S47. Quality check of point cloud for mission 2 (nadir flight, repetitive scan mode). Elevation values for GCPs (Point elevation), species of vegetation identified at each point, elevation values of the corresponding point from the LiDAR point cloud (LiDAR elevation), and RMSE value at each point. Elevation values are expressed in ellipsoidal height.

| Point ID | species                | Point elevation (m) | LiDAR elevation (m) | RMSE (m) |
|----------|------------------------|---------------------|---------------------|----------|
| R15      | Sarcocornia+Sporobolus | 46.175              | 46.358              | 0.183    |
| R38      | Sarcocornia            | 45.952              | 46.133              | 0.181    |
| R22      | Sarcocornia            | 46.121              | 46.299              | 0.178    |
| R20      | Sarcocornia            | 46.152              | 46.326              | 0.174    |
| R30      | Sarcocornia            | 46.142              | 46.316              | 0.174    |
| R36      | Sarcocornia            | 46.1                | 46.272              | 0.172    |
| R13      | Sarcocornia            | 46.059              | 46.23               | 0.171    |
| B3       | Sarcocornia            | 46.17               | 46.335              | 0.165    |
| R42      | Sarcocornia            | 46.151              | 46.316              | 0.165    |
| R31      | Sarcocornia            | 46.189              | 46.348              | 0.159    |
| R35      | Sarcocornia            | 45.995              | 46.154              | 0.159    |
| R24      | Sarcocornia            | 46.052              | 46.21               | 0.158    |
| R54      | Sarcocornia            | 45.918              | 46.071              | 0.153    |
| R45      | Sarcocornia            | 46.082              | 46.234              | 0.152    |
| R27      | Sarcocornia            | 46.131              | 46.281              | 0.15     |
| R3       | Salicornia             | 46.118              | 46.268              | 0.15     |
| R25      | Sarcocornia            | 46.159              | 46.306              | 0.147    |
| R26      | Sarcocornia            | 46.145              | 46.292              | 0.147    |
| R55      | Sarcocornia            | 45.98               | 46.122              | 0.142    |
| R18      | Sarcocornia            | 46.213              | 46.353              | 0.14     |
| R14      | Sarcocornia            | 46.172              | 46.31               | 0.138    |
| R44      | Sarcocornia            | 46.078              | 46.212              | 0.134    |
| R11      | Salicornia             | 46.064              | 46.195              | 0.131    |
| R47      | Salicornia             | 46.013              | 46.144              | 0.131    |
| R53      | Sarcocornia            | 46.071              | 46.202              | 0.131    |
| R40      | Sarcocornia            | 46.111              | 46.241              | 0.13     |
| C4       | peeling                | 46.049              | 46.178              | 0.129    |
| R23      | Sarcocornia            | 46.093              | 46.222              | 0.129    |
| R16      | Sarcocornia            | 46.205              | 46.332              | 0.127    |
| R39      | Sarcocornia            | 46.115              | 46.242              | 0.127    |
| R12      | Salicornia             | 46.128              | 46.254              | 0.126    |
| R17      | Sarcocornia            | 46.191              | 46.317              | 0.126    |
| R29      | Sarcocornia            | 46.176              | 46.301              | 0.125    |
| R32      | Sarcocornia            | 46.193              | 46.318              | 0.125    |
| R19      | Sarcocornia            | 46.135              | 46.256              | 0.121    |
| R43      | Sarcocornia+Sporobolus | 46.136              | 46.257              | 0.121    |
| R10      | Salicornia             | 46.115              | 46.231              | 0.116    |
| R28      | Sarcocornia            | 46.145              | 46.261              | 0.116    |
| R34      | Sarcocornia            | 46.171              | 46.287              | 0.116    |
| C2       | peeling                | 46.208              | 46.317              | 0.109    |
| R41      | Sarcocornia            | 46.116              | 46.221              | 0.105    |
| R6       | Salicornia             | 46.114              | 46.219              | 0.105    |
| R21      | Sarcocornia            | 46.161              | 46.264              | 0.103    |
| R33      | Sarcocornia            | 46.148              | 46.247              | 0.099    |
| R7       | Salicornia             | 46.089              | 46.188              | 0.099    |
| R9       | Salicornia             | 46.054              | 46.152              | 0.098    |
| C3       | peeling                | 46.109              | 46.206              | 0.097    |
| R50      | Salicornia             | 46.037              | 46.134              | 0.097    |
| R52      | Salicornia             | 45.958              | 46.054              | 0.096    |
| R37      | Sarcocornia            | 45.994              | 46.088              | 0.094    |

|                  |             |        |        |              |
|------------------|-------------|--------|--------|--------------|
| C1               | peeling     | 46.211 | 46.301 | 0.09         |
| R56              | Sarcocornia | 45.848 | 45.937 | 0.089        |
| R46              | Salicornia  | 46.091 | 46.178 | 0.087        |
| R5               | Salicornia  | 46.114 | 46.2   | 0.086        |
| R8               | Salicornia  | 46.09  | 46.172 | 0.082        |
| R51              | Salicornia  | 46.001 | 46.076 | 0.075        |
| R4               | Salicornia  | 46.136 | 46.202 | 0.066        |
| R2               | Salicornia  | 46.18  | 46.243 | 0.063        |
| R48              | Salicornia  | 45.937 | 46     | 0.063        |
| R49              | Salicornia  | 45.917 | 45.974 | 0.057        |
| R1               | base        | 47.452 | 47.468 | 0.016        |
| <b>Mean RMSE</b> |             |        |        | <b>0.128</b> |

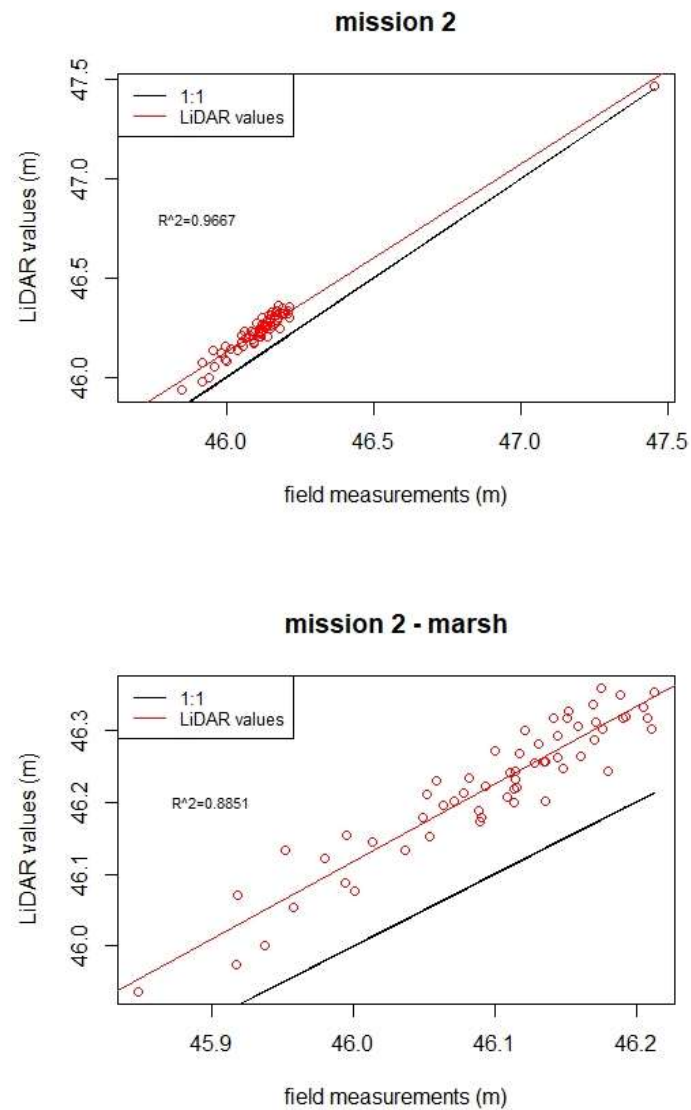

Figure S9. Linear regression and  $R^2$  value for point cloud values from mission 2 compared to GCPs. Upper graph plots all points, while lower graph shows the existing relationship by using only the points situated on the marsh surface. The red line is the regression line for the compared datasets, the black line represents the 1:1 pattern.

Table S48. Quality check of point cloud for mission 3 (oblique flight, non-repetitive scan mode). Elevation values for GCPs (Point elevation), species of vegetation identified at each point, elevation values of the corresponding point from the LiDAR point cloud (LiDAR elevation), and RMSE value at each point. Elevation values are expressed in ellipsoidal height.

| Point ID | species                | Point elevation (m) | LiDAR elevation (m) | RMSE (m) |
|----------|------------------------|---------------------|---------------------|----------|
| R20      | Sarcocornia            | 46.152              | 46.347              | 0.195    |
| R15      | Sarcocornia+Sporobolus | 46.175              | 46.356              | 0.181    |
| R38      | Sarcocornia            | 45.952              | 46.109              | 0.157    |
| R36      | Sarcocornia            | 46.1                | 46.253              | 0.153    |
| R55      | Sarcocornia            | 45.98               | 46.133              | 0.153    |
| R42      | Sarcocornia            | 46.151              | 46.296              | 0.145    |
| R30      | Sarcocornia            | 46.142              | 46.286              | 0.144    |
| R24      | Sarcocornia            | 46.052              | 46.195              | 0.143    |
| R45      | Sarcocornia            | 46.082              | 46.218              | 0.136    |
| R35      | Sarcocornia            | 45.995              | 46.127              | 0.132    |
| R3       | Salicornia             | 46.118              | 46.247              | 0.129    |
| R22      | Sarcocornia            | 46.121              | 46.244              | 0.123    |
| R53      | Sarcocornia            | 46.071              | 46.193              | 0.122    |
| R29      | Sarcocornia            | 46.176              | 46.296              | 0.12     |
| R11      | Salicornia             | 46.064              | 46.182              | 0.118    |
| R39      | Sarcocornia            | 46.115              | 46.233              | 0.118    |
| R23      | Sarcocornia            | 46.093              | 46.209              | 0.116    |
| R18      | Sarcocornia            | 46.213              | 46.328              | 0.115    |
| R26      | Sarcocornia            | 46.145              | 46.26               | 0.115    |
| C3       | peeling                | 46.109              | 46.221              | 0.112    |
| R27      | Sarcocornia            | 46.131              | 46.242              | 0.111    |
| C2       | peeling                | 46.208              | 46.315              | 0.107    |
| R14      | Sarcocornia            | 46.172              | 46.279              | 0.107    |
| R34      | Sarcocornia            | 46.171              | 46.277              | 0.106    |
| R25      | Sarcocornia            | 46.159              | 46.264              | 0.105    |
| R43      | Sarcocornia+Sporobolus | 46.136              | 46.239              | 0.103    |
| R54      | Sarcocornia            | 45.918              | 46.021              | 0.103    |
| R12      | Salicornia             | 46.128              | 46.23               | 0.102    |
| R31      | Sarcocornia            | 46.189              | 46.291              | 0.102    |
| R41      | Sarcocornia            | 46.116              | 46.216              | 0.1      |
| B3       | Sarcocornia            | 46.17               | 46.267              | 0.097    |
| R47      | Salicornia             | 46.013              | 46.11               | 0.097    |
| R32      | Sarcocornia            | 46.193              | 46.289              | 0.096    |
| R21      | Sarcocornia            | 46.161              | 46.254              | 0.093    |
| R52      | Salicornia             | 45.958              | 46.049              | 0.091    |
| R44      | Sarcocornia            | 46.078              | 46.168              | 0.09     |
| R13      | Sarcocornia            | 46.059              | 46.148              | 0.089    |
| R40      | Sarcocornia            | 46.111              | 46.2                | 0.089    |
| R17      | Sarcocornia            | 46.191              | 46.279              | 0.088    |
| R10      | Salicornia             | 46.115              | 46.2                | 0.085    |
| R6       | Salicornia             | 46.114              | 46.196              | 0.082    |
| R19      | Sarcocornia            | 46.135              | 46.212              | 0.077    |
| R8       | Salicornia             | 46.09               | 46.167              | 0.077    |
| R9       | Salicornia             | 46.054              | 46.126              | 0.072    |
| R16      | Sarcocornia            | 46.205              | 46.276              | 0.071    |
| R56      | Sarcocornia            | 45.848              | 45.919              | 0.071    |
| C4       | peeling                | 46.049              | 46.118              | 0.069    |
| C1       | peeling                | 46.211              | 46.273              | 0.062    |
| R5       | Salicornia             | 46.114              | 46.176              | 0.062    |
| R46      | Salicornia             | 46.091              | 46.148              | 0.057    |
| R2       | Salicornia             | 46.18               | 46.229              | 0.049    |
| R4       | Salicornia             | 46.136              | 46.184              | 0.048    |

|                  |             |        |        |              |
|------------------|-------------|--------|--------|--------------|
| R37              | Sarcocornia | 45.994 | 46.041 | 0.047        |
| B1               | Sporobolus  | 45.7   | 45.744 | 0.044        |
| R7               | Salicornia  | 46.089 | 46.129 | 0.04         |
| R1               | base        | 47.452 | 47.422 | 0.03         |
| R33              | Sarcocornia | 46.148 | 46.175 | 0.027        |
| R51              | Salicornia  | 46.001 | 46.022 | 0.021        |
| R50              | Salicornia  | 46.037 | 46.054 | 0.017        |
| R48              | Salicornia  | 45.937 | 45.953 | 0.016        |
| R49              | Salicornia  | 45.917 | 45.926 | 0.0088615417 |
| R28              | Sarcocornia | 46.145 | 46.137 | 0.0081558228 |
| B2               | Transition  | 45.904 | 45.897 | 0.0072669983 |
| <b>Mean RMSE</b> |             |        |        | <b>0.101</b> |

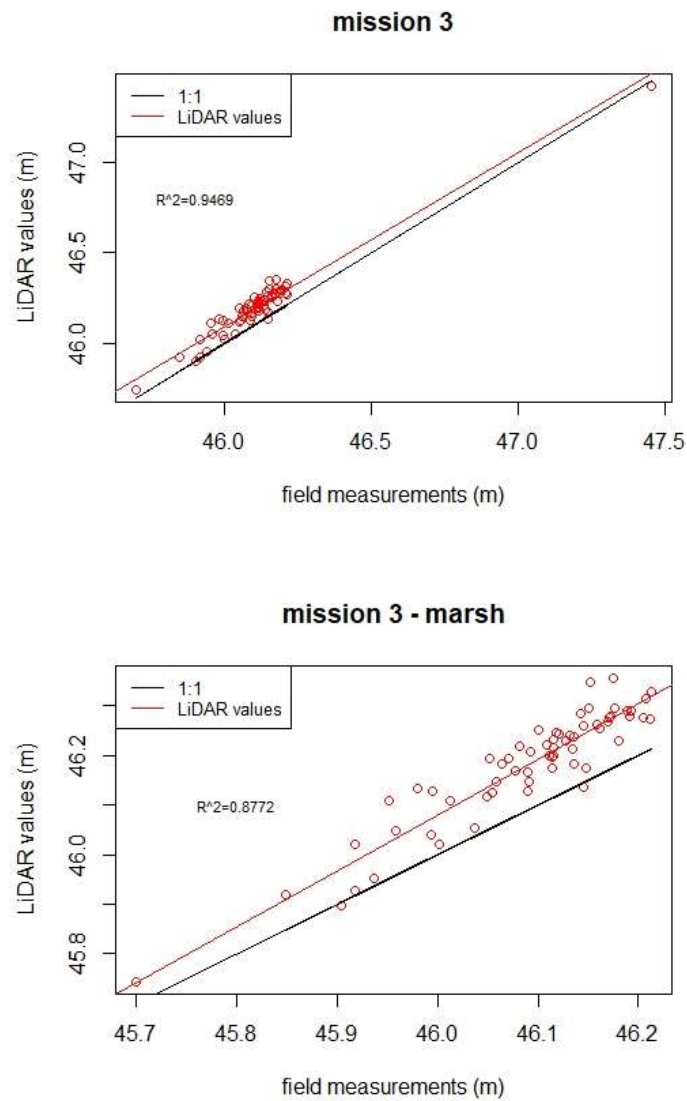

Figure S10. Linear regression and  $R^2$  value for point cloud values from mission 3 compared to GCPs. Upper graph plots all points, while lower graph shows the existing relationship by using only the points situated on the marsh surface. The red line is the regression line for the compared datasets, the black line represents the 1:1 pattern.

Table S49. Quality check of point cloud for mission 4 (oblique flight, repetitive scan mode). Elevation values for GCPs (Point elevation), species of vegetation identified at each point, elevation values of the corresponding point from the LiDAR point cloud (LiDAR elevation), and RMSE value at each point. Elevation values are expressed in ellipsoidal height.

| Point ID | species                | Point elevation (m) | LiDAR elevation (m) | RMSE (m) |
|----------|------------------------|---------------------|---------------------|----------|
| R15      | Sarcocornia+Sporobolus | 46.175              | 46.378              | 0.203    |
| B3       | Sarcocornia            | 46.17               | 46.368              | 0.198    |
| R20      | Sarcocornia            | 46.152              | 46.332              | 0.18     |
| R35      | Sarcocornia            | 45.995              | 46.169              | 0.174    |
| R38      | Sarcocornia            | 45.952              | 46.115              | 0.163    |
| R36      | Sarcocornia            | 46.1                | 46.259              | 0.159    |
| R14      | Sarcocornia            | 46.172              | 46.327              | 0.155    |
| R3       | Salicornia             | 46.118              | 46.269              | 0.151    |
| R42      | Sarcocornia            | 46.151              | 46.298              | 0.147    |
| R13      | Sarcocornia            | 46.059              | 46.203              | 0.144    |
| R25      | Sarcocornia            | 46.159              | 46.303              | 0.144    |
| R22      | Sarcocornia            | 46.121              | 46.26               | 0.139    |
| R26      | Sarcocornia            | 46.145              | 46.279              | 0.134    |
| R54      | Sarcocornia            | 45.918              | 46.052              | 0.134    |
| R30      | Sarcocornia            | 46.142              | 46.275              | 0.133    |
| R11      | Salicornia             | 46.064              | 46.196              | 0.132    |
| R34      | Sarcocornia            | 46.171              | 46.302              | 0.131    |
| R12      | Salicornia             | 46.128              | 46.255              | 0.127    |
| R45      | Sarcocornia            | 46.082              | 46.206              | 0.124    |
| R18      | Sarcocornia            | 46.213              | 46.333              | 0.12     |
| R19      | Sarcocornia            | 46.135              | 46.254              | 0.119    |
| R24      | Sarcocornia            | 46.052              | 46.169              | 0.117    |
| R16      | Sarcocornia            | 46.205              | 46.319              | 0.114    |
| R23      | Sarcocornia            | 46.093              | 46.207              | 0.114    |
| R27      | Sarcocornia            | 46.131              | 46.245              | 0.114    |
| C4       | peeling                | 46.049              | 46.161              | 0.112    |
| R21      | Sarcocornia            | 46.161              | 46.268              | 0.107    |
| R39      | Sarcocornia            | 46.115              | 46.222              | 0.107    |
| R37      | Sarcocornia            | 45.994              | 46.099              | 0.105    |
| R41      | Sarcocornia            | 46.116              | 46.221              | 0.105    |
| R47      | Salicornia             | 46.013              | 46.118              | 0.105    |
| R28      | Sarcocornia            | 46.145              | 46.249              | 0.104    |
| C3       | peeling                | 46.109              | 46.212              | 0.103    |
| R17      | Sarcocornia            | 46.191              | 46.293              | 0.102    |
| R53      | Sarcocornia            | 46.071              | 46.173              | 0.102    |
| R40      | Sarcocornia            | 46.111              | 46.211              | 0.1      |
| R55      | Sarcocornia            | 45.98               | 46.079              | 0.099    |
| C2       | peeling                | 46.208              | 46.306              | 0.098    |
| R29      | Sarcocornia            | 46.176              | 46.274              | 0.098    |
| R10      | Salicornia             | 46.115              | 46.211              | 0.096    |
| R31      | Sarcocornia            | 46.189              | 46.285              | 0.096    |
| R32      | Sarcocornia            | 46.193              | 46.287              | 0.094    |
| R9       | Salicornia             | 46.054              | 46.145              | 0.091    |
| R7       | Salicornia             | 46.089              | 46.178              | 0.089    |
| R8       | Salicornia             | 46.09               | 46.178              | 0.088    |
| R44      | Sarcocornia            | 46.078              | 46.164              | 0.086    |
| R33      | Sarcocornia            | 46.148              | 46.233              | 0.085    |
| R6       | Salicornia             | 46.114              | 46.198              | 0.084    |
| R5       | Salicornia             | 46.114              | 46.193              | 0.079    |
| R43      | Sarcocornia+Sporobolus | 46.136              | 46.213              | 0.077    |
| C1       | peeling                | 46.211              | 46.285              | 0.074    |
| R52      | Salicornia             | 45.958              | 46.03               | 0.072    |
| R4       | Salicornia             | 46.136              | 46.203              | 0.067    |

|                  |             |        |        |              |
|------------------|-------------|--------|--------|--------------|
| R46              | Salicornia  | 46.091 | 46.157 | 0.066        |
| R56              | Sarcocornia | 45.848 | 45.913 | 0.065        |
| R48              | Salicornia  | 45.937 | 45.996 | 0.059        |
| R50              | Salicornia  | 46.037 | 46.096 | 0.059        |
| R2               | Salicornia  | 46.18  | 46.232 | 0.052        |
| R51              | Salicornia  | 46.001 | 46.025 | 0.024        |
| R49              | Salicornia  | 45.917 | 45.934 | 0.017        |
| R1               | base        | 47.452 | 47.467 | 0.015        |
| <b>Mean RMSE</b> |             |        |        | <b>0.114</b> |

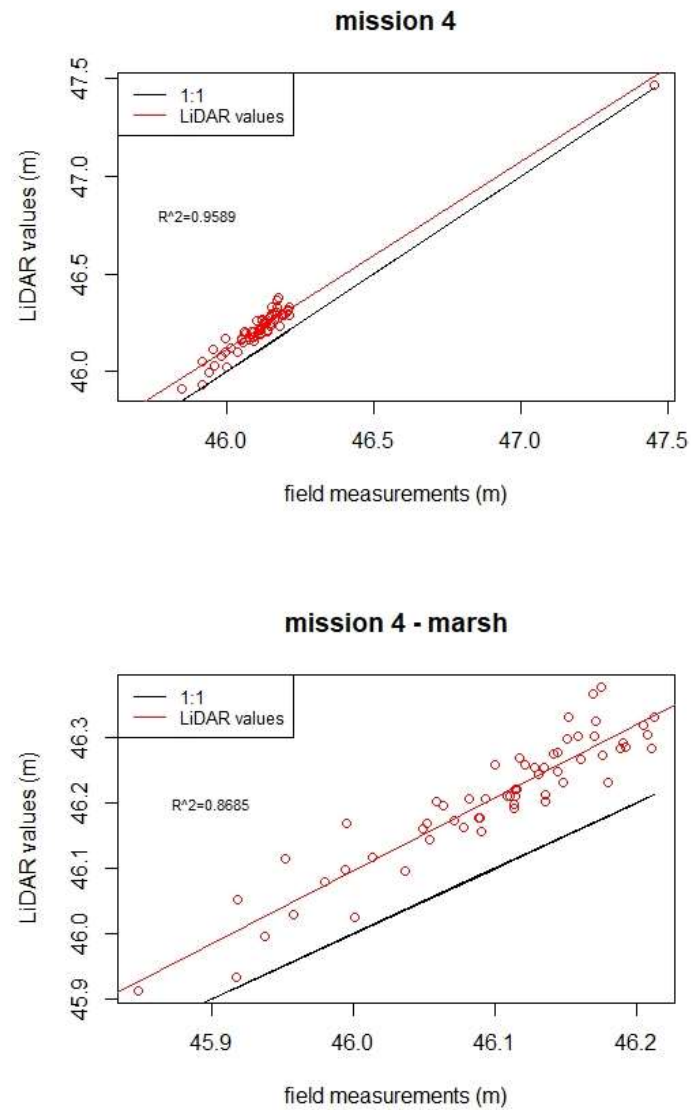

Figure S11. Linear regression and  $R^2$  value for point cloud values from mission 4 compared to GCPs. Upper graph plots all points, while lower graph shows the existing relationship by using only the points situated on the marsh surface. The red line is the regression line for the compared datasets, the black line represents the 1:1 pattern.

Table S50. Quality check of point cloud for mission 5 (nadir flight, non-repetitive scan mode). Elevation values for GCPs (Point elevation), species of vegetation identified at each point, elevation values of the corresponding point from the LiDAR point cloud (LiDAR elevation), and RMSE value at each point. Elevation values are expressed in ellipsoidal height.

| Point ID | species                | Field_elevation (m) | LiDAR_elevation (m) | RMSE (m) |
|----------|------------------------|---------------------|---------------------|----------|
| R38      | Sarcocornia            | 45.952              | 46.118              | 0.166    |
| R15      | Sarcocornia+Sporobolus | 46.175              | 46.337              | 0.162    |
| R35      | Sarcocornia            | 45.995              | 46.149              | 0.154    |
| R30      | Sarcocornia            | 46.142              | 46.289              | 0.147    |
| R54      | Sarcocornia            | 45.918              | 46.063              | 0.145    |
| R13      | Sarcocornia            | 46.059              | 46.203              | 0.144    |
| R3       | Salicornia             | 46.118              | 46.26               | 0.142    |
| R42      | Sarcocornia            | 46.151              | 46.289              | 0.138    |
| R27      | Sarcocornia            | 46.131              | 46.267              | 0.136    |
| R22      | Sarcocornia            | 46.121              | 46.255              | 0.134    |
| R36      | Sarcocornia            | 46.1                | 46.233              | 0.133    |
| R31      | Sarcocornia            | 46.189              | 46.319              | 0.13     |
| R20      | Sarcocornia            | 46.152              | 46.281              | 0.129    |
| R14      | Sarcocornia            | 46.172              | 46.299              | 0.127    |
| R24      | Sarcocornia            | 46.052              | 46.179              | 0.127    |
| R11      | Salicornia             | 46.064              | 46.187              | 0.123    |
| R34      | Sarcocornia            | 46.171              | 46.292              | 0.121    |
| R41      | Sarcocornia            | 46.116              | 46.237              | 0.121    |
| R53      | Sarcocornia            | 46.071              | 46.191              | 0.12     |
| R16      | Sarcocornia            | 46.205              | 46.324              | 0.119    |
| R17      | Sarcocornia            | 46.191              | 46.31               | 0.119    |
| R18      | Sarcocornia            | 46.213              | 46.33               | 0.117    |
| R12      | Salicornia             | 46.128              | 46.243              | 0.115    |
| R40      | Sarcocornia            | 46.111              | 46.222              | 0.111    |
| R45      | Sarcocornia            | 46.082              | 46.193              | 0.111    |
| R26      | Sarcocornia            | 46.145              | 46.255              | 0.11     |
| R29      | Sarcocornia            | 46.176              | 46.281              | 0.105    |
| R39      | Sarcocornia            | 46.115              | 46.219              | 0.104    |
| R25      | Sarcocornia            | 46.159              | 46.262              | 0.103    |
| R32      | Sarcocornia            | 46.193              | 46.296              | 0.103    |
| R44      | Sarcocornia            | 46.078              | 46.181              | 0.103    |
| R7       | Salicornia             | 46.089              | 46.188              | 0.099    |
| R43      | Sarcocornia+Sporobolus | 46.136              | 46.23               | 0.094    |
| R55      | Sarcocornia            | 45.98               | 46.071              | 0.091    |
| R6       | Salicornia             | 46.114              | 46.202              | 0.088    |
| R19      | Sarcocornia            | 46.135              | 46.222              | 0.087    |
| R28      | Sarcocornia            | 46.145              | 46.232              | 0.087    |
| R5       | Salicornia             | 46.114              | 46.201              | 0.087    |
| R33      | Sarcocornia            | 46.148              | 46.23               | 0.082    |
| R37      | Sarcocornia            | 45.994              | 46.075              | 0.081    |
| R47      | Salicornia             | 46.013              | 46.09               | 0.077    |
| R8       | Salicornia             | 46.09               | 46.162              | 0.072    |
| R52      | Salicornia             | 45.958              | 46.029              | 0.071    |
| R23      | Sarcocornia            | 46.093              | 46.163              | 0.07     |
| R21      | Sarcocornia            | 46.161              | 46.23               | 0.069    |
| R10      | Salicornia             | 46.115              | 46.182              | 0.067    |
| R46      | Salicornia             | 46.091              | 46.158              | 0.067    |
| R48      | Salicornia             | 45.937              | 46.004              | 0.067    |
| R9       | Salicornia             | 46.054              | 46.118              | 0.064    |
| B3       |                        | 46.17               | 46.229              | 0.059    |
| R2       | Salicornia             | 46.18               | 46.239              | 0.059    |
| R4       | Salicornia             | 46.136              | 46.194              | 0.058    |
| R51      | Salicornia             | 46.001              | 46.057              | 0.056    |

|                  |             |        |        |              |
|------------------|-------------|--------|--------|--------------|
| C3               | peeling     | 46.109 | 46.058 | 0.051        |
| R50              | Salicornia  | 46.037 | 46.078 | 0.041        |
| R56              | Sarcocornia | 45.848 | 45.889 | 0.041        |
| C4               | peeling     | 46.049 | 46.083 | 0.034        |
| R49              | Salicornia  | 45.917 | 45.933 | 0.016        |
| C1               | peeling     | 46.211 | 46.223 | 0.012        |
| R1               | base        | 47.452 | 47.445 | 0.0072212219 |
| C2               | peeling     | 46.208 | 46.211 | 0.0033836365 |
| <b>Mean RMSE</b> |             |        |        | <b>0.102</b> |

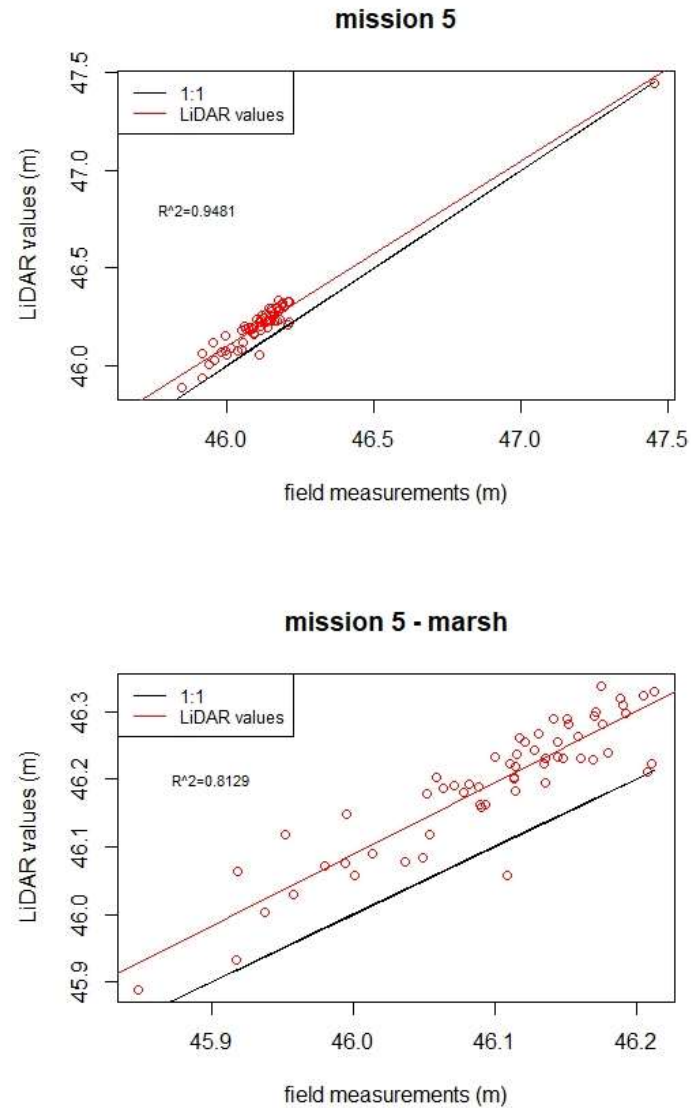

Figure S12. Linear regression and  $R^2$  value for point cloud values from mission 5 compared to GCPs. Upper graph plots all points, while lower graph shows the existing relationship by using only the points situated on the marsh surface. The red line is the regression line for the compared datasets, the black line represents the 1:1 pattern.

Table S51. Quality check of point cloud for mission 6 (nadir flight, repetitive scan mode). Elevation values for GCPs (Point elevation), species of vegetation identified at each point, elevation values of the corresponding point from the LiDAR point cloud (LiDAR elevation), and RMSE value at each point. Elevation values are expressed in ellipsoidal height.

| Point ID | species                | Point elevation (m) | LiDAR elevation (m) | RMSE (m) |
|----------|------------------------|---------------------|---------------------|----------|
| R20      | Sarcocornia            | 46.152              | 46.344              | 0.192    |
| R15      | Sarcocornia+Sporobolus | 46.175              | 46.365              | 0.19     |
| R42      | Sarcocornia            | 46.151              | 46.329              | 0.178    |
| R38      | Sarcocornia            | 45.952              | 46.124              | 0.172    |
| R22      | Sarcocornia            | 46.121              | 46.29               | 0.169    |
| R3       | Salicornia             | 46.118              | 46.286              | 0.168    |
| R13      | Sarcocornia            | 46.059              | 46.221              | 0.162    |
| R30      | Sarcocornia            | 46.142              | 46.304              | 0.162    |
| R36      | Sarcocornia            | 46.1                | 46.26               | 0.16     |
| R14      | Sarcocornia            | 46.172              | 46.329              | 0.157    |
| R31      | Sarcocornia            | 46.189              | 46.346              | 0.157    |
| R26      | Sarcocornia            | 46.145              | 46.296              | 0.151    |
| R18      | Sarcocornia            | 46.213              | 46.363              | 0.15     |
| R35      | Sarcocornia            | 45.995              | 46.145              | 0.15     |
| R16      | Sarcocornia            | 46.205              | 46.354              | 0.149    |
| R29      | Sarcocornia            | 46.176              | 46.325              | 0.149    |
| R25      | Sarcocornia            | 46.159              | 46.306              | 0.147    |
| R24      | Sarcocornia            | 46.052              | 46.197              | 0.145    |
| R53      | Sarcocornia            | 46.071              | 46.216              | 0.145    |
| R17      | Sarcocornia            | 46.191              | 46.334              | 0.143    |
| R27      | Sarcocornia            | 46.131              | 46.274              | 0.143    |
| R44      | Sarcocornia            | 46.078              | 46.221              | 0.143    |
| R54      | Sarcocornia            | 45.918              | 46.06               | 0.142    |
| R11      | Salicornia             | 46.064              | 46.204              | 0.14     |
| R19      | Sarcocornia            | 46.135              | 46.275              | 0.14     |
| R47      | Salicornia             | 46.013              | 46.151              | 0.138    |
| R45      | Sarcocornia            | 46.082              | 46.218              | 0.136    |
| R40      | Sarcocornia            | 46.111              | 46.245              | 0.134    |
| R39      | Sarcocornia            | 46.115              | 46.244              | 0.129    |
| R12      | Salicornia             | 46.128              | 46.256              | 0.128    |
| R23      | Sarcocornia            | 46.093              | 46.221              | 0.128    |
| R28      | Sarcocornia            | 46.145              | 46.269              | 0.124    |
| R32      | Sarcocornia            | 46.193              | 46.317              | 0.124    |
| R34      | Sarcocornia            | 46.171              | 46.288              | 0.117    |
| R55      | Sarcocornia            | 45.98               | 46.095              | 0.115    |
| R7       | Salicornia             | 46.089              | 46.201              | 0.112    |
| R9       | Salicornia             | 46.054              | 46.166              | 0.112    |
| R10      | Salicornia             | 46.115              | 46.226              | 0.111    |
| R41      | Sarcocornia            | 46.116              | 46.223              | 0.107    |
| R43      | Sarcocornia+Sporobolus | 46.136              | 46.243              | 0.107    |
| R21      | Sarcocornia            | 46.161              | 46.266              | 0.105    |
| R33      | Sarcocornia            | 46.148              | 46.253              | 0.105    |
| R37      | Sarcocornia            | 45.994              | 46.099              | 0.105    |
| R52      | Salicornia             | 45.958              | 46.062              | 0.104    |
| R6       | Salicornia             | 46.114              | 46.216              | 0.102    |
| B3       | Sarcocornia            | 46.17               | 46.267              | 0.097    |
| R8       | Salicornia             | 46.09               | 46.187              | 0.097    |
| R46      | Salicornia             | 46.091              | 46.184              | 0.093    |
| R56      | Sarcocornia            | 45.848              | 45.934              | 0.086    |
| R5       | Salicornia             | 46.114              | 46.199              | 0.085    |
| R50      | Salicornia             | 46.037              | 46.119              | 0.082    |
| R2       | Salicornia             | 46.18               | 46.258              | 0.078    |
| R4       | Salicornia             | 46.136              | 46.213              | 0.077    |

|           |            |        |        |              |
|-----------|------------|--------|--------|--------------|
| R49       | Salicornia | 45.917 | 45.985 | 0.068        |
| R48       | Salicornia | 45.937 | 45.996 | 0.059        |
| R51       | Salicornia | 46.001 | 46.059 | 0.058        |
| R1        | base       | 47.452 | 47.495 | 0.043        |
| C3        | peeling    | 46.109 | 46.072 | 0.037        |
| C2        | peeling    | 46.208 | 46.243 | 0.035        |
| C4        | peeling    | 46.049 | 46.078 | 0.029        |
| C1        | peeling    | 46.211 | 46.233 | 0.022        |
| Mean RMSE |            |        |        | <b>0.126</b> |

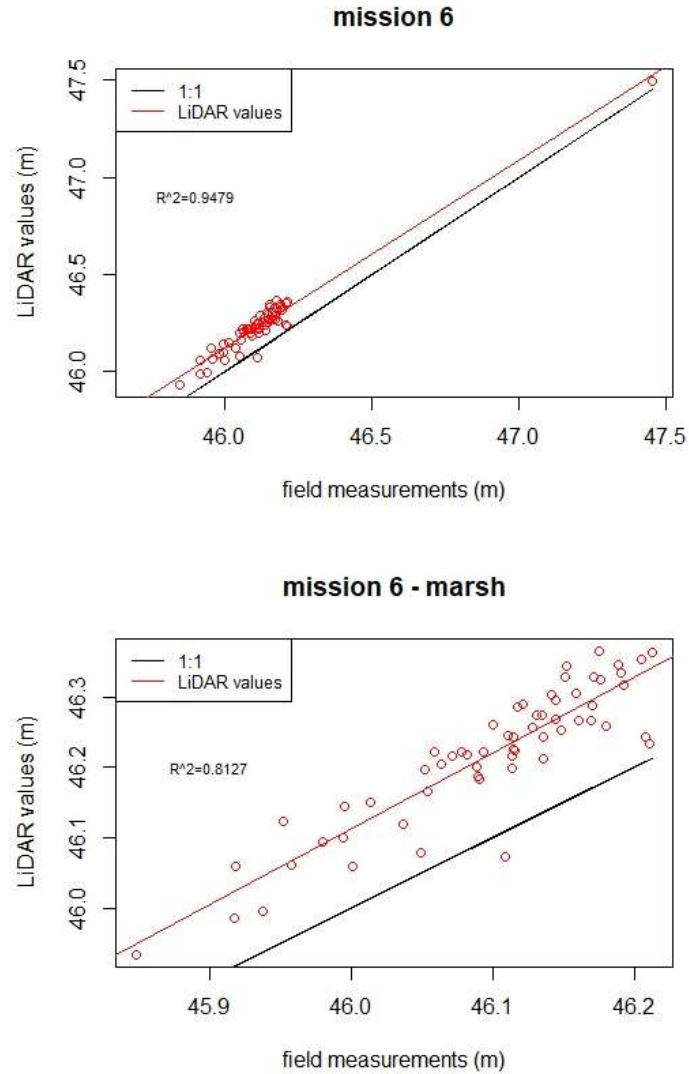

Figure S13. Linear regression and  $R^2$  value for point cloud values from mission 6 compared to GCPs. Upper graph plots all points, while lower graph shows the existing relationship by using only the points situated on the marsh surface. The red line is the regression line for the compared datasets, the black line represents the 1:1 pattern.

Table S52. Quality check of point cloud for mission 7 (oblique flight, non-repetitive scan mode). Elevation values for GCPs (Point elevation), species of vegetation identified at each point, elevation values of the corresponding point from the LiDAR point cloud (LiDAR elevation), and RMSE value at each point. Elevation values are expressed in ellipsoidal height.

| Point ID | species                | Point elevation (m) | LiDAR elevation (m) | RMSE (m) |
|----------|------------------------|---------------------|---------------------|----------|
| R20      | Sarcocornia            | 46.152              | 46.318              | 0.166    |
| R42      | Sarcocornia            | 46.151              | 46.313              | 0.162    |
| R15      | Sarcocornia+Sporobolus | 46.175              | 46.336              | 0.161    |
| R35      | Sarcocornia            | 45.995              | 46.146              | 0.151    |
| R38      | Sarcocornia            | 45.952              | 46.095              | 0.143    |
| R36      | Sarcocornia            | 46.1                | 46.242              | 0.142    |
| R1       | base                   | 47.452              | 47.592              | 0.14     |
| R19      | Sarcocornia            | 46.135              | 46.272              | 0.137    |
| R22      | Sarcocornia            | 46.121              | 46.255              | 0.134    |
| R45      | Sarcocornia            | 46.082              | 46.214              | 0.132    |
| R25      | Sarcocornia            | 46.159              | 46.287              | 0.128    |
| R30      | Sarcocornia            | 46.142              | 46.268              | 0.126    |
| R54      | Sarcocornia            | 45.918              | 46.044              | 0.126    |
| R13      | Sarcocornia            | 46.059              | 46.184              | 0.125    |
| R34      | Sarcocornia            | 46.171              | 46.293              | 0.122    |
| R28      | Sarcocornia            | 46.145              | 46.266              | 0.121    |
| R3       | Salicornia             | 46.118              | 46.238              | 0.12     |
| R11      | Salicornia             | 46.064              | 46.181              | 0.117    |
| R27      | Sarcocornia            | 46.131              | 46.247              | 0.116    |
| R24      | Sarcocornia            | 46.052              | 46.166              | 0.114    |
| R31      | Sarcocornia            | 46.189              | 46.298              | 0.109    |
| R23      | Sarcocornia            | 46.093              | 46.2                | 0.107    |
| R16      | Sarcocornia            | 46.205              | 46.31               | 0.105    |
| R39      | Sarcocornia            | 46.115              | 46.22               | 0.105    |
| R10      | Salicornia             | 46.115              | 46.215              | 0.1      |
| R21      | Sarcocornia            | 46.161              | 46.261              | 0.1      |
| R44      | Sarcocornia            | 46.078              | 46.178              | 0.1      |
| R14      | Sarcocornia            | 46.172              | 46.27               | 0.098    |
| R26      | Sarcocornia            | 46.145              | 46.242              | 0.097    |
| R55      | Sarcocornia            | 45.98               | 46.076              | 0.096    |
| R18      | Sarcocornia            | 46.213              | 46.305              | 0.092    |
| R41      | Sarcocornia            | 46.116              | 46.208              | 0.092    |
| R43      | Sarcocornia+Sporobolus | 46.136              | 46.225              | 0.089    |
| R17      | Sarcocornia            | 46.191              | 46.278              | 0.087    |
| R6       | Salicornia             | 46.114              | 46.201              | 0.087    |
| R7       | Salicornia             | 46.089              | 46.174              | 0.085    |
| R32      | Sarcocornia            | 46.193              | 46.276              | 0.083    |
| R46      | Salicornia             | 46.091              | 46.174              | 0.083    |
| R9       | Salicornia             | 46.054              | 46.136              | 0.082    |
| R33      | Sarcocornia            | 46.148              | 46.229              | 0.081    |
| R5       | Salicornia             | 46.114              | 46.194              | 0.08     |
| R53      | Sarcocornia            | 46.071              | 46.151              | 0.08     |
| R56      | Sarcocornia            | 45.848              | 45.928              | 0.08     |
| R47      | Salicornia             | 46.013              | 46.09               | 0.077    |
| R29      | Sarcocornia            | 46.176              | 46.248              | 0.072    |
| R37      | Sarcocornia            | 45.994              | 46.066              | 0.072    |
| R40      | Sarcocornia            | 46.111              | 46.183              | 0.072    |
| R52      | Salicornia             | 45.958              | 46.03               | 0.072    |
| R4       | Salicornia             | 46.136              | 46.201              | 0.065    |
| B3       | Sarcocornia            | 46.17               | 46.233              | 0.063    |
| R8       | Salicornia             | 46.09               | 46.138              | 0.048    |
| C4       | peeling                | 46.049              | 46.087              | 0.038    |
| R12      | Salicornia             | 46.128              | 46.161              | 0.033    |

|                  |            |        |        |              |
|------------------|------------|--------|--------|--------------|
| C2               | peeling    | 46.208 | 46.238 | 0.03         |
| R48              | Salicornia | 45.937 | 45.966 | 0.029        |
| R51              | Salicornia | 46.001 | 46.027 | 0.026        |
| R2               | Salicornia | 46.18  | 46.202 | 0.022        |
| R50              | Salicornia | 46.037 | 46.052 | 0.015        |
| B2               | Transition | 45.904 | 45.912 | 0.0075721741 |
| B1               | Sporobolus | 45.7   | 45.702 | 0.0016479492 |
| C1               | peeling    | 46.211 | 46.21  | 0.0013275146 |
| C3               | peeling    | 46.109 | 46.109 | 0.0002288818 |
| R49              | Salicornia | 45.917 | 45.917 | 0.0000190735 |
| <b>Mean RMSE</b> |            |        |        | <b>0.098</b> |

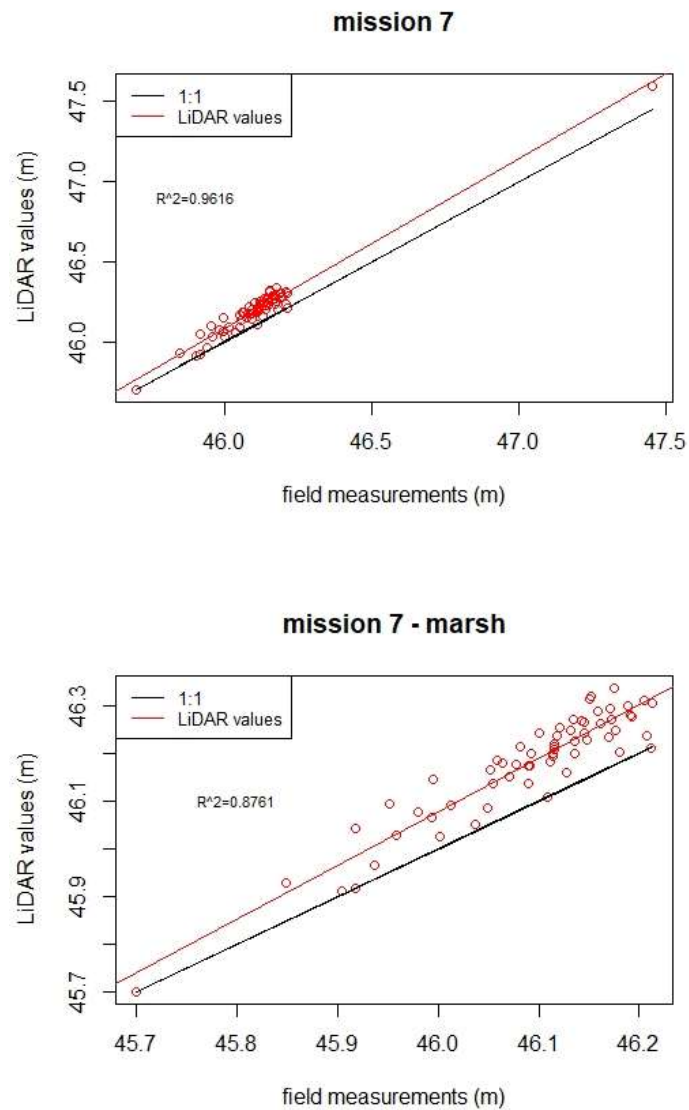

Figure S14. Linear regression and  $R^2$  value for point cloud values from mission 7 compared to GCPs. Upper graph plots all points, while lower graph shows the existing relationship by using only the points situated on the marsh surface. The red line is the regression line for the compared datasets, the black line represents the 1:1 pattern.

Table S53. Quality check of point cloud for mission 8 (oblique flight, repetitive scan mode). Elevation values for GCPs (Point elevation), species of vegetation identified at each point, elevation values of the corresponding point from the LiDAR point cloud (LiDAR elevation), and RMSE value at each point. Elevation values are expressed in ellipsoidal height.

| Point ID | species                | Point elevation (m) | LiDAR elevation (m) | RMSE (m) |
|----------|------------------------|---------------------|---------------------|----------|
| R1       | base                   | 47.452              | 47.701              | 0.249    |
| R35      | Sarcocornia            | 45.995              | 46.166              | 0.171    |
| R15      | Sarcocornia+Sporobolus | 46.175              | 46.336              | 0.161    |
| R38      | Sarcocornia            | 45.952              | 46.106              | 0.154    |
| R20      | Sarcocornia            | 46.152              | 46.298              | 0.146    |
| R24      | Sarcocornia            | 46.052              | 46.191              | 0.139    |
| R53      | Sarcocornia            | 46.071              | 46.209              | 0.138    |
| R13      | Sarcocornia            | 46.059              | 46.196              | 0.137    |
| R25      | Sarcocornia            | 46.159              | 46.295              | 0.136    |
| R36      | Sarcocornia            | 46.1                | 46.236              | 0.136    |
| R39      | Sarcocornia            | 46.115              | 46.241              | 0.126    |
| R54      | Sarcocornia            | 45.918              | 46.036              | 0.118    |
| R19      | Sarcocornia            | 46.135              | 46.252              | 0.117    |
| R26      | Sarcocornia            | 46.145              | 46.262              | 0.117    |
| R55      | Sarcocornia            | 45.98               | 46.095              | 0.115    |
| R22      | Sarcocornia            | 46.121              | 46.234              | 0.113    |
| R18      | Sarcocornia            | 46.213              | 46.325              | 0.112    |
| R31      | Sarcocornia            | 46.189              | 46.297              | 0.108    |
| R27      | Sarcocornia            | 46.131              | 46.238              | 0.107    |
| R23      | Sarcocornia            | 46.093              | 46.195              | 0.102    |
| R33      | Sarcocornia            | 46.148              | 46.25               | 0.102    |
| R11      | Salicornia             | 46.064              | 46.163              | 0.099    |
| R3       | Salicornia             | 46.118              | 46.217              | 0.099    |
| R42      | Sarcocornia            | 46.151              | 46.25               | 0.099    |
| R14      | Sarcocornia            | 46.172              | 46.269              | 0.097    |
| R30      | Sarcocornia            | 46.142              | 46.237              | 0.095    |
| R46      | Salicornia             | 46.091              | 46.186              | 0.095    |
| R12      | Salicornia             | 46.128              | 46.22               | 0.092    |
| R17      | Sarcocornia            | 46.191              | 46.282              | 0.091    |
| R28      | Sarcocornia            | 46.145              | 46.227              | 0.082    |
| R8       | Salicornia             | 46.09               | 46.168              | 0.078    |
| R16      | Sarcocornia            | 46.205              | 46.282              | 0.077    |
| R21      | Sarcocornia            | 46.161              | 46.238              | 0.077    |
| R43      | Sarcocornia+Sporobolus | 46.136              | 46.213              | 0.077    |
| R52      | Salicornia             | 45.958              | 46.035              | 0.077    |
| R40      | Sarcocornia            | 46.111              | 46.187              | 0.076    |
| R32      | Sarcocornia            | 46.193              | 46.266              | 0.073    |
| R37      | Sarcocornia            | 45.994              | 46.067              | 0.073    |
| R45      | Sarcocornia            | 46.082              | 46.152              | 0.07     |
| R6       | Salicornia             | 46.114              | 46.183              | 0.069    |
| R34      | Sarcocornia            | 46.171              | 46.237              | 0.066    |
| R29      | Sarcocornia            | 46.176              | 46.241              | 0.065    |
| R10      | Salicornia             | 46.115              | 46.179              | 0.064    |
| R7       | Salicornia             | 46.089              | 46.153              | 0.063    |
| R50      | Salicornia             | 46.037              | 46.098              | 0.061    |
| R51      | Salicornia             | 46.001              | 46.058              | 0.057    |
| R56      | Sarcocornia            | 45.848              | 45.903              | 0.055    |
| R48      | Salicornia             | 45.937              | 45.99               | 0.053    |
| R47      | Salicornia             | 46.013              | 46.059              | 0.046    |
| R5       | Salicornia             | 46.114              | 46.159              | 0.045    |
| R9       | Salicornia             | 46.054              | 46.096              | 0.042    |

|                  |             |        |        |              |
|------------------|-------------|--------|--------|--------------|
| C2               | peeling     | 46.208 | 46.243 | 0.035        |
| R49              | Salicornia  | 45.917 | 45.952 | 0.035        |
| R44              | Sarcocornia | 46.078 | 46.112 | 0.034        |
| B3               | Sarcocornia | 46.17  | 46.203 | 0.033        |
| R2               | Salicornia  | 46.18  | 46.213 | 0.033        |
| R4               | Salicornia  | 46.136 | 46.158 | 0.022        |
| C4               | peeling     | 46.049 | 46.07  | 0.021        |
| R41              | Sarcocornia | 46.116 | 46.135 | 0.019        |
| C3               | peeling     | 46.109 | 46.091 | 0.018        |
| C1               | peeling     | 46.211 | 46.21  | 0.0009346008 |
| <b>Mean RMSE</b> |             |        |        | <b>0.097</b> |

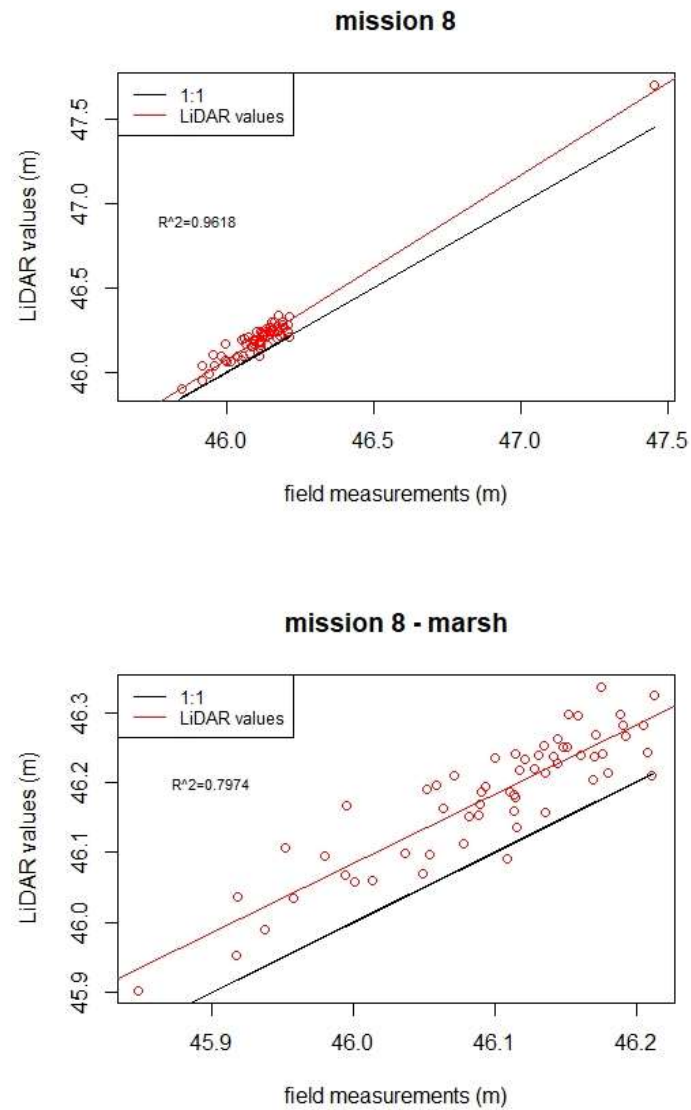

Figure S15. Linear regression and  $R^2$  value for point cloud values from mission 8 compared to GCPs. Upper graph plots all points, while lower graph shows the existing relationship by using only the points situated on the marsh surface. The red line is the regression line for the compared datasets, the black line represents the 1:1 pattern.

*Table S54. Resume of point clouds accuracy assessment for the eight missions.*

| Point cloud mission nº | Max RMSE | Min RMSE | Average RMSE | R <sup>2</sup> value (all points) | R <sup>2</sup> value (marsh points) |
|------------------------|----------|----------|--------------|-----------------------------------|-------------------------------------|
| 1                      | 0.276    | 0.013    | 0.11         | 0.9515                            | 0.8211                              |
| 2                      | 0.183    | 0.016    | 0.13         | 0.9667                            | 0.8851                              |
| 3                      | 0.195    | 0.007    | 0.10         | 0.9469                            | 0.8772                              |
| 4                      | 0.203    | 0.015    | 0.11         | 0.9589                            | 0.8685                              |
| 5                      | 0.166    | 0.003    | 0.10         | 0.9481                            | 0.8129                              |
| 6                      | 0.192    | 0.022    | 0.13         | 0.9479                            | 0.8127                              |
| 7                      | 0.166    | 0.000    | 0.10         | 0.9616                            | 0.8761                              |
| 8                      | 0.249    | 0.001    | 0.10         | 0.9618                            | 0.7974                              |

Table S55. Elevation from GCPs (Elevation column) and elevation values extracted at each corresponding point from 5-point-spacing-DEMs for the eight missions; each DEM is identified by the number of its mission in the column header (01\_5ps means 5-point-spacing-DEM from mission 1). Elevation values are expressed in ellipsoidal height.

| Point Id | species                | Elevation (m) | 01_5ps | 02_5ps | 03_5ps | 04_5ps | 05_5ps | 06_5ps | 07_5ps | 08_5ps |
|----------|------------------------|---------------|--------|--------|--------|--------|--------|--------|--------|--------|
| B3       | Sarcocornia            | 46.17         | 46.25  | 46.29  | 46.21  | 46.34  | 46.19  | 46.26  | 46.14  | 46.20  |
| C1       | peeled area            | 46.21         | 46.17  | 46.30  | 46.26  | 46.25  | 46.15  | 46.24  | 46.17  | 46.19  |
| C2       | peeled area            | 46.21         | 46.18  | 46.31  | 46.25  | 46.26  | 46.16  | 46.24  | 46.20  | 46.19  |
| C3       | peeled area            | 46.11         | 46.07  | 46.13  | 46.14  | 46.16  | 45.95  | 46.04  | 46.06  | 46.03  |
| C4       | peeled area            | 46.05         | 46.06  | 46.12  | 46.13  | 46.14  | 45.95  | 46.05  | 46.06  | 46.01  |
| R1       | base                   | 47.45         | 47.45  | 47.48  | 47.44  | 47.47  | 47.44  | 47.51  | 47.54  | 47.49  |
| R10      | Salicornia             | 46.11         | 46.09  | 46.21  | 46.17  | 46.18  | 46.12  | 46.22  | 46.18  | 46.19  |
| R11      | Salicornia             | 46.06         | 45.88  | 45.96  | 45.97  | 45.97  | 45.89  | 45.92  | 46.10  | 46.10  |
| R12      | Salicornia             | 46.13         | 46.08  | 46.22  | 46.15  | 46.18  | 46.12  | 46.22  | 46.18  | 46.15  |
| R13      | Sarcocornia            | 46.06         | 46.11  | 46.22  | 46.10  | 46.16  | 46.13  | 46.21  | 46.12  | 46.14  |
| R14      | Sarcocornia            | 46.17         | 46.18  | 46.26  | 46.16  | 46.27  | 46.18  | 46.26  | 46.18  | 46.19  |
| R15      | Sarcocornia+Sporobolus | 46.17         | 46.25  | 46.32  | 46.15  | 46.28  | 46.25  | 46.32  | 46.20  | 46.27  |
| R16      | Sarcocornia            | 46.20         | 46.16  | 46.24  | 46.27  | 46.26  | 46.19  | 46.34  | 46.25  | 46.25  |
| R17      | Sarcocornia            | 46.19         | 46.03  | 46.02  | 46.10  | 46.26  | 46.10  | 46.09  | 46.13  | 46.27  |
| R18      | Sarcocornia            | 46.21         | 46.24  | 46.33  | 46.24  | 46.31  | 46.22  | 46.36  | 46.23  | 46.29  |
| R19      | Sarcocornia            | 46.14         | 46.13  | 46.25  | 46.15  | 46.19  | 46.15  | 46.23  | 46.22  | 46.16  |
| R2       | Salicornia             | 46.18         | 46.15  | 46.24  | 46.14  | 46.18  | 46.15  | 46.25  | 46.18  | 46.20  |
| R20      | Sarcocornia            | 46.15         | 46.10  | 46.18  | 46.21  | 46.25  | 46.13  | 46.27  | 46.24  | 46.22  |
| R21      | Sarcocornia            | 46.16         | 46.16  | 46.26  | 46.22  | 46.24  | 46.13  | 46.27  | 46.19  | 46.21  |
| R22      | Sarcocornia            | 46.12         | 46.13  | 46.25  | 46.15  | 46.21  | 46.13  | 46.25  | 46.13  | 46.18  |
| R23      | Sarcocornia            | 46.09         | 46.08  | 46.21  | 46.13  | 46.15  | 46.08  | 46.21  | 46.10  | 46.13  |
| R24      | Sarcocornia            | 46.05         | 45.96  | 46.14  | 46.02  | 46.10  | 45.95  | 46.05  | 45.96  | 46.10  |
| R25      | Sarcocornia            | 46.16         | 46.16  | 46.27  | 46.25  | 46.23  | 46.16  | 46.27  | 46.18  | 46.21  |
| R26      | Sarcocornia            | 46.14         | 45.88  | 45.87  | 46.14  | 46.23  | 46.06  | 45.92  | 46.11  | 46.18  |
| R27      | Sarcocornia            | 46.13         | 46.16  | 46.24  | 46.14  | 46.19  | 46.17  | 46.22  | 46.13  | 46.17  |
| R28      | Sarcocornia            | 46.14         | 45.99  | 46.07  | 45.96  | 46.10  | 46.07  | 45.97  | 46.04  | 46.17  |
| R29      | Sarcocornia            | 46.18         | 46.18  | 46.29  | 46.19  | 46.24  | 46.19  | 46.28  | 46.19  | 46.23  |
| R3       | Salicornia             | 46.12         | 46.13  | 46.23  | 46.10  | 46.24  | 46.14  | 46.24  | 46.19  | 46.22  |
| R30      | Sarcocornia            | 46.14         | 46.18  | 46.25  | 46.16  | 46.22  | 46.17  | 46.28  | 46.17  | 46.21  |
| R31      | Sarcocornia            | 46.19         | 46.20  | 46.27  | 46.20  | 46.22  | 46.22  | 46.31  | 46.17  | 46.20  |
| R32      | Sarcocornia            | 46.19         | 46.26  | 46.30  | 46.26  | 46.29  | 46.21  | 46.29  | 46.24  | 46.24  |
| R33      | Sarcocornia            | 46.15         | 46.13  | 46.24  | 46.19  | 46.16  | 46.14  | 46.24  | 46.17  | 46.15  |
| R34      | Sarcocornia            | 46.17         | 46.18  | 46.26  | 46.17  | 46.20  | 46.19  | 46.26  | 46.20  | 46.19  |
| R35      | Sarcocornia            | 46.00         | 45.99  | 46.13  | 46.05  | 46.06  | 45.99  | 46.07  | 46.07  | 46.05  |
| R36      | Sarcocornia            | 46.10         | 46.06  | 46.22  | 46.21  | 46.18  | 46.09  | 46.23  | 46.17  | 46.19  |
| R37      | Sarcocornia            | 45.99         | 45.97  | 46.08  | 46.00  | 46.05  | 45.98  | 46.04  | 45.96  | 46.02  |
| R38      | Sarcocornia            | 45.95         | 45.93  | 46.05  | 46.02  | 46.02  | 45.71  | 46.04  | 45.97  | 46.02  |
| R39      | Sarcocornia            | 46.11         | 46.11  | 46.19  | 46.14  | 46.15  | 46.11  | 46.19  | 46.12  | 46.15  |
| R4       | Salicornia             | 46.14         | 46.10  | 46.20  | 46.13  | 46.19  | 46.14  | 46.22  | 46.16  | 46.18  |
| R40      | Sarcocornia            | 46.11         | 46.13  | 46.18  | 46.10  | 46.11  | 46.12  | 46.17  | 46.09  | 46.12  |
| R41      | Sarcocornia            | 46.12         | 46.14  | 46.20  | 46.18  | 46.19  | 46.13  | 46.20  | 46.16  | 46.18  |
| R42      | Sarcocornia            | 46.15         | 46.19  | 46.25  | 46.24  | 46.23  | 46.17  | 46.25  | 46.26  | 46.21  |
| R43      | Sarcocornia+Sporobolus | 46.14         | 46.17  | 46.23  | 46.21  | 46.17  | 46.15  | 46.25  | 46.20  | 46.18  |
| R44      | Sarcocornia            | 46.08         | 46.10  | 46.16  | 46.15  | 46.08  | 46.09  | 46.17  | 46.13  | 46.08  |
| R45      | Sarcocornia            | 46.08         | 46.12  | 46.17  | 46.15  | 46.17  | 46.12  | 46.18  | 46.15  | 46.19  |
| R46      | Salicornia             | 46.09         | 46.10  | 46.17  | 46.08  | 46.14  | 46.10  | 46.17  | 46.07  | 46.12  |
| R47      | Salicornia             | 46.01         | 46.04  | 46.12  | 46.03  | 46.03  | 46.03  | 46.11  | 46.00  | 46.03  |
| R48      | Salicornia             | 45.94         | 45.86  | 45.98  | 45.91  | 45.94  | 45.89  | 45.98  | 45.89  | 45.94  |
| R49      | Salicornia             | 45.92         | 45.89  | 45.95  | 45.90  | 45.89  | 45.84  | 45.96  | 45.90  | 45.89  |
| R5       | Salicornia             | 46.11         | 46.09  | 46.19  | 46.01  | 46.16  | 46.12  | 46.19  | 46.14  | 46.13  |
| R50      | Salicornia             | 46.04         | 46.00  | 46.10  | 45.97  | 46.04  | 46.01  | 46.09  | 45.99  | 46.02  |
| R51      | Salicornia             | 46.00         | 45.82  | 46.01  | 45.89  | 45.99  | 45.90  | 45.96  | 45.95  | 45.99  |
| R52      | Salicornia             | 45.96         | 45.87  | 46.02  | 45.98  | 45.95  | 45.87  | 45.99  | 45.95  | 45.97  |
| R53      | Sarcocornia            | 46.07         | 46.08  | 46.15  | 46.01  | 46.10  | 46.07  | 46.15  | 46.07  | 46.08  |
| R54      | Sarcocornia            | 45.92         | 45.93  | 45.88  | 45.95  | 45.97  | 45.78  | 45.76  | 45.98  | 45.98  |

|     |             |       |       |       |       |       |       |       |       |       |
|-----|-------------|-------|-------|-------|-------|-------|-------|-------|-------|-------|
| R55 | Sarcocornia | 45.98 | 45.90 | 46.03 | 45.96 | 46.02 | 45.92 | 46.01 | 46.02 | 45.98 |
| R56 | Sarcocornia | 45.85 | 45.69 | 45.89 | 45.70 | 45.85 | 45.72 | 45.94 | 45.81 | 45.85 |
| R6  | Salicornia  | 46.11 | 46.07 | 46.20 | 46.12 | 46.17 | 46.13 | 46.20 | 46.15 | 46.13 |
| R7  | Salicornia  | 46.09 | 46.09 | 46.19 | 46.14 | 46.15 | 46.10 | 46.18 | 46.14 | 46.12 |
| R8  | Salicornia  | 46.09 | 46.04 | 46.17 | 46.11 | 46.15 | 46.06 | 46.17 | 46.13 | 46.13 |
| R9  | Salicornia  | 46.05 | 46.04 | 46.15 | 46.07 | 46.12 | 46.05 | 46.15 | 46.08 | 46.11 |

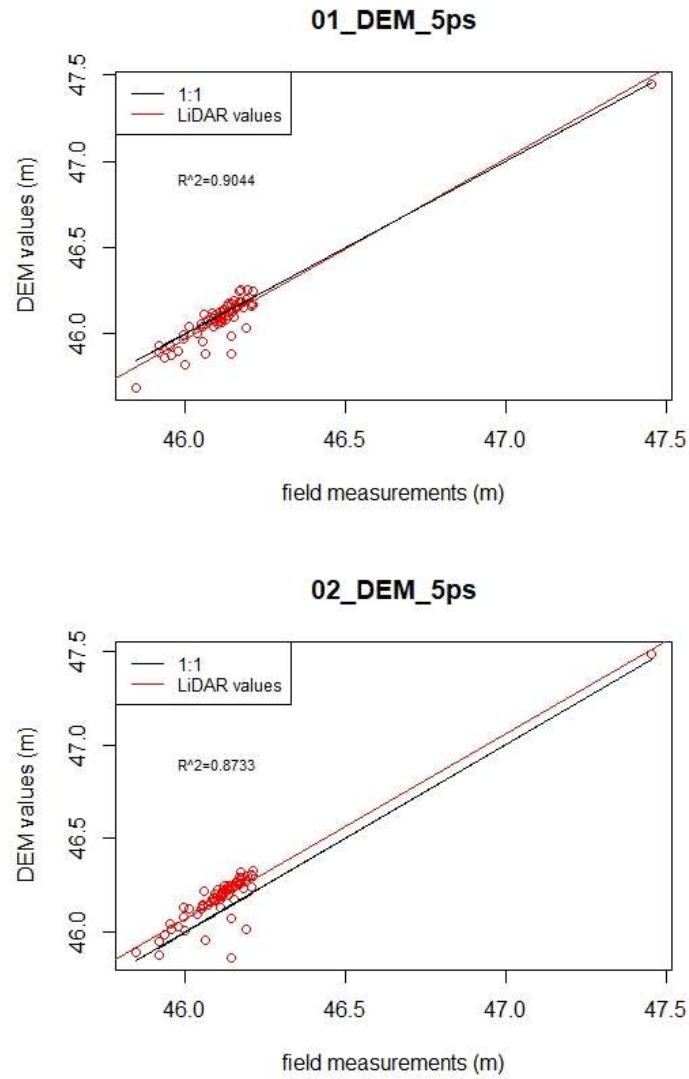

Figure S16. (Continue)

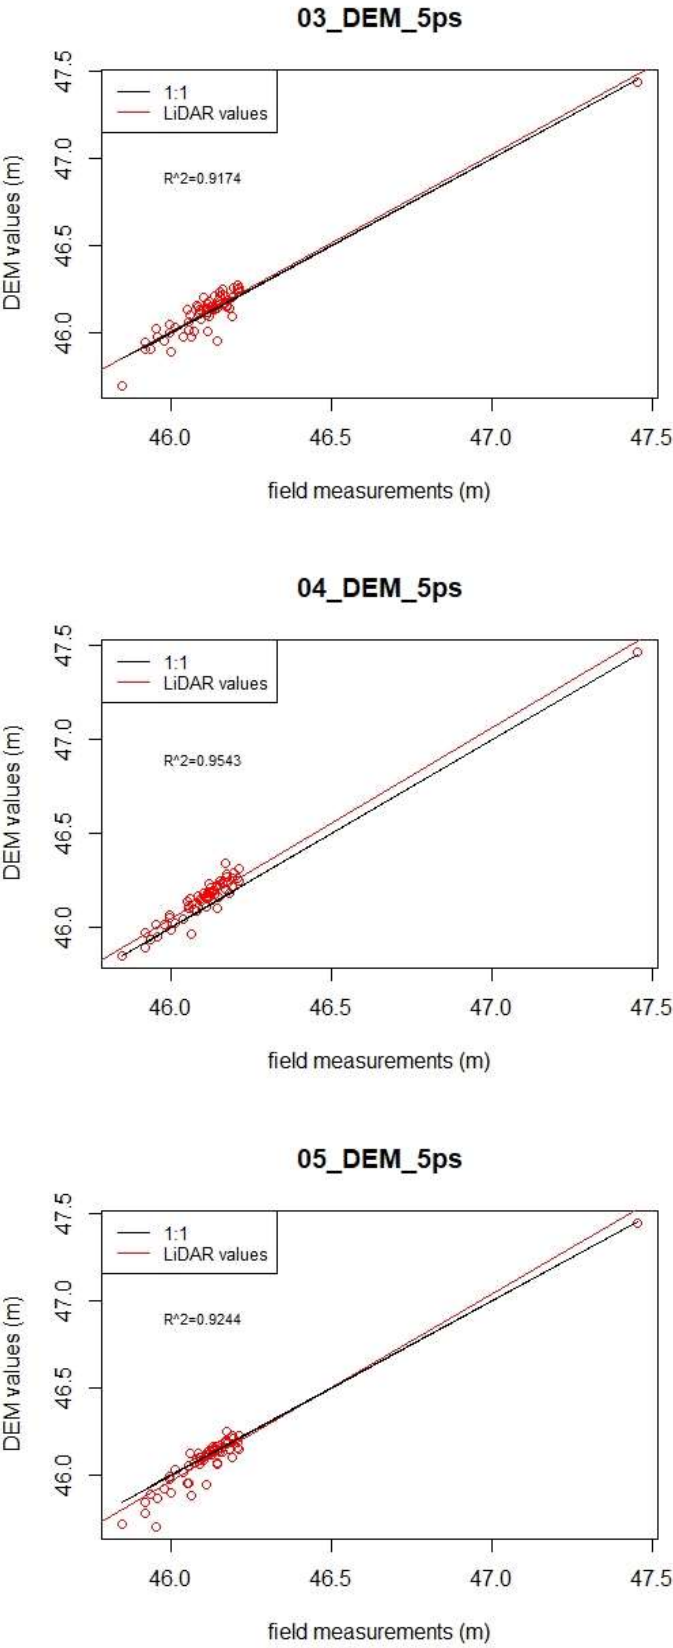

Figure S16. (Continue)

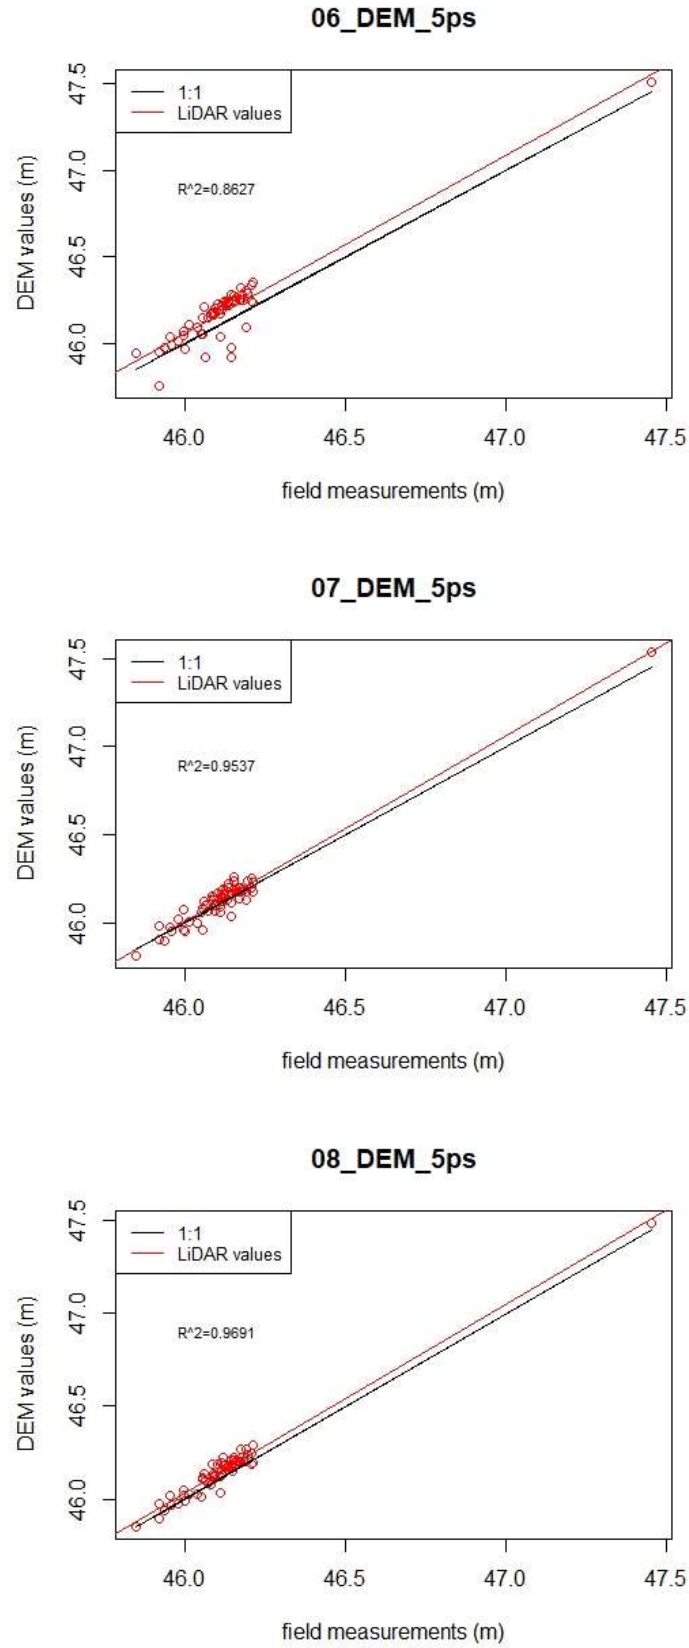

Figure S16. Linear regression and  $R^2$  value for 5-point-spacing-DEMs values from the eight missions compared to GCPs. The red line is the regression line for the compared datasets, the black line represents the 1:1 pattern.

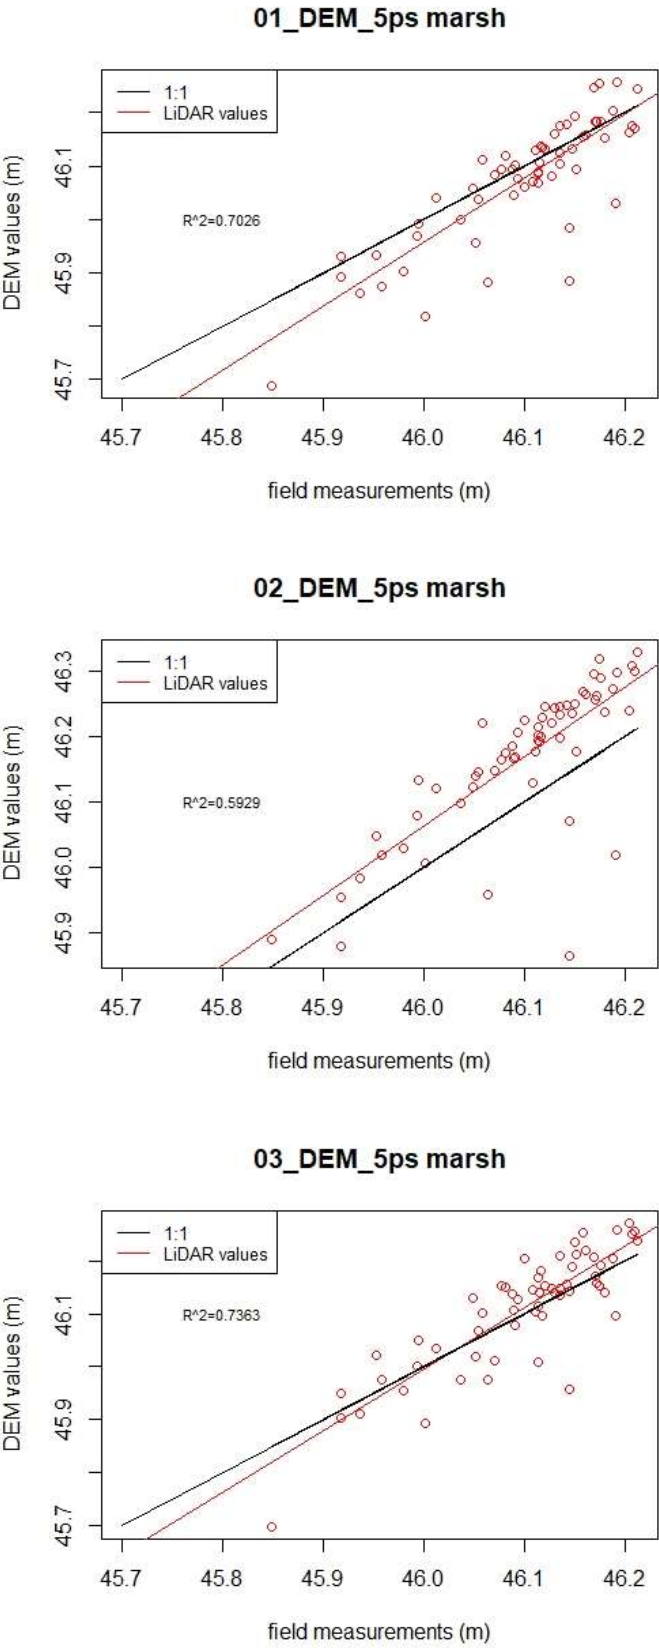

Figure S17. (Continue)

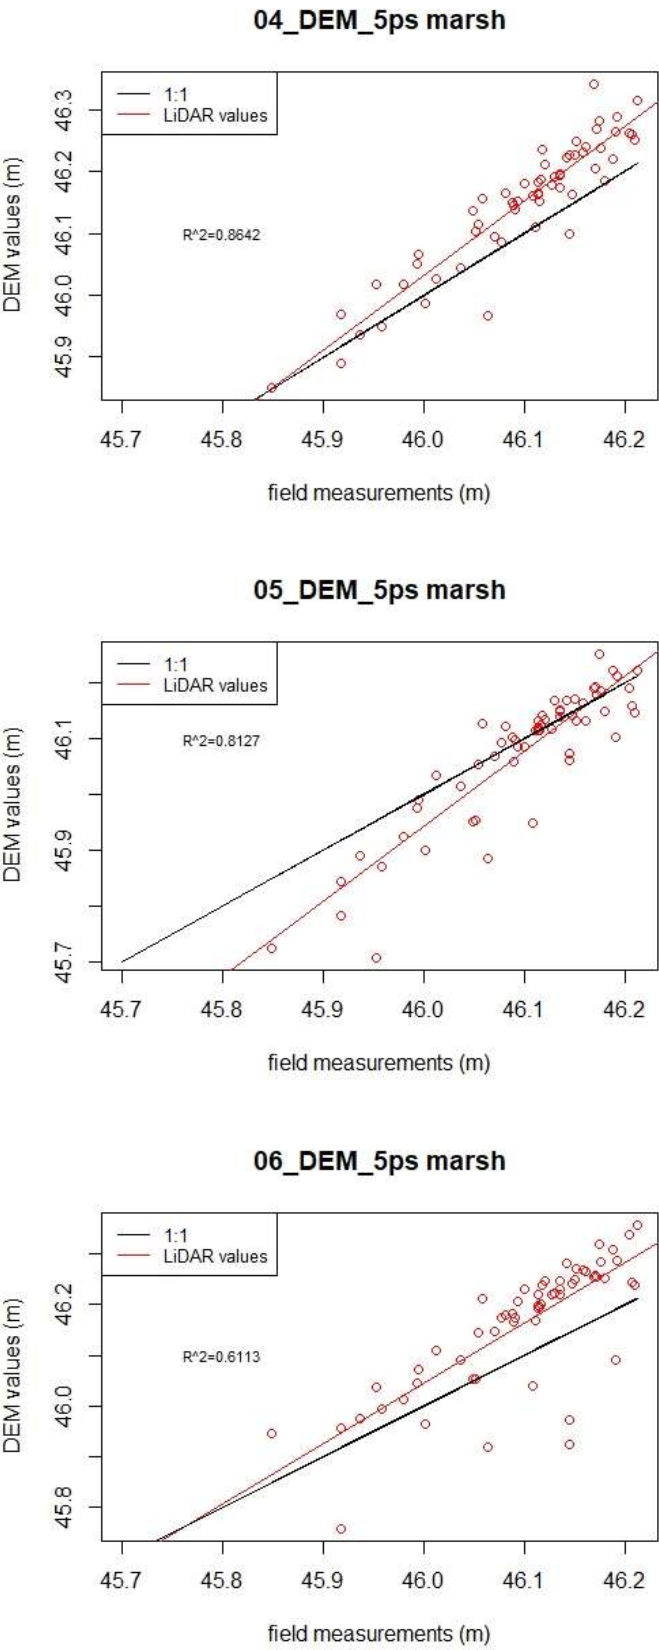

Figure S17. (Continue)

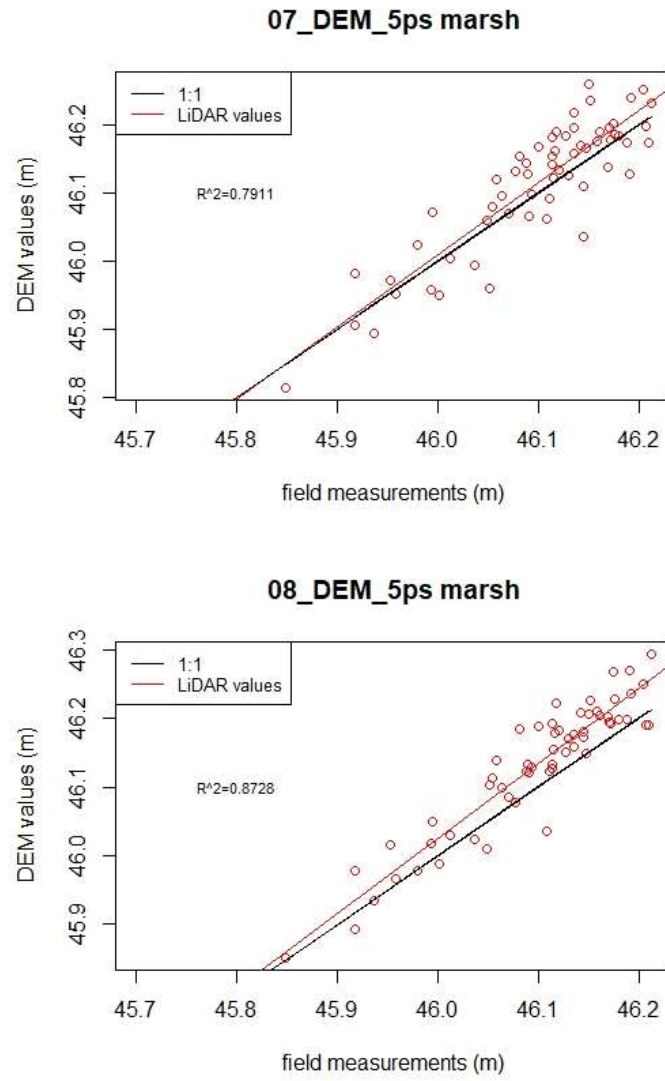

Figure S17. Linear regression and  $R^2$  values for 5-point-spacing-DEMs values from the eight missions compared to GCPs using only points situated on the marsh surface. The red line is the regression line for the compared datasets, the black line represents the 1:1 pattern.

Table S56. Difference in elevation at each point between 5-point-spacing-DEMs value and GCP value for DEMs derived from the eight missions.

| Point Id | 01_DEM_<br>5ps | 02_DEM_<br>5ps | 03_DEM_<br>5ps | 04_DEM_<br>5ps | 05_DEM_<br>5ps | 06_DEM_<br>5ps | 07_DEM_<br>5ps | 08_DEM_<br>5ps |
|----------|----------------|----------------|----------------|----------------|----------------|----------------|----------------|----------------|
| B3       | 0.078          | 0.125          | 0.038          | 0.171          | 0.021          | 0.086          | -0.032         | 0.032          |
| C1       | -0.040         | 0.090          | 0.046          | 0.039          | -0.065         | 0.028          | -0.037         | -0.020         |
| C2       | -0.032         | 0.100          | 0.043          | 0.052          | -0.048         | 0.037          | -0.009         | -0.018         |
| C3       | -0.038         | 0.020          | 0.035          | 0.052          | -0.160         | -0.069         | -0.047         | -0.074         |
| C4       | 0.008          | 0.073          | 0.081          | 0.088          | -0.099         | 0.003          | 0.010          | -0.040         |
| R1       | -0.006         | 0.032          | -0.013         | 0.013          | -0.011         | 0.057          | 0.085          | 0.033          |
| R10      | -0.026         | 0.099          | 0.053          | 0.068          | 0.005          | 0.104          | 0.067          | 0.077          |
| R11      | -0.181         | -0.105         | -0.090         | -0.097         | -0.178         | -0.145         | 0.032          | 0.035          |
| R12      | -0.046         | 0.093          | 0.021          | 0.051          | -0.010         | 0.093          | 0.056          | 0.023          |
| R13      | 0.054          | 0.162          | 0.042          | 0.097          | 0.068          | 0.153          | 0.061          | 0.079          |
| R14      | 0.012          | 0.090          | -0.013         | 0.097          | 0.006          | 0.083          | 0.007          | 0.020          |
| R15      | 0.079          | 0.144          | -0.023         | 0.106          | 0.077          | 0.145          | 0.027          | 0.092          |
| R16      | -0.043         | 0.035          | 0.066          | 0.056          | -0.014         | 0.133          | 0.048          | 0.044          |
| R17      | -0.161         | -0.172         | -0.094         | 0.073          | -0.087         | -0.099         | -0.064         | 0.079          |
| R18      | 0.031          | 0.116          | 0.024          | 0.102          | 0.011          | 0.144          | 0.019          | 0.080          |
| R19      | -0.010         | 0.111          | 0.014          | 0.060          | 0.018          | 0.097          | 0.084          | 0.024          |
| R2       | -0.027         | 0.057          | -0.040         | 0.004          | -0.031         | 0.073          | 0.004          | 0.019          |
| R20      | -0.057         | 0.025          | 0.061          | 0.096          | -0.020         | 0.119          | 0.085          | 0.073          |
| R21      | -0.002         | 0.103          | 0.059          | 0.080          | -0.029         | 0.106          | 0.029          | 0.044          |
| R22      | 0.012          | 0.125          | 0.032          | 0.091          | 0.014          | 0.125          | 0.013          | 0.062          |
| R23      | -0.017         | 0.113          | 0.032          | 0.059          | -0.009         | 0.113          | 0.004          | 0.034          |
| R24      | -0.095         | 0.088          | -0.033         | 0.051          | -0.098         | 0.001          | -0.092         | 0.052          |
| R25      | -0.003         | 0.109          | 0.094          | 0.072          | 0.004          | 0.110          | 0.017          | 0.051          |
| R26      | -0.261         | -0.280         | -0.003         | 0.082          | -0.083         | -0.221         | -0.035         | 0.035          |
| R27      | 0.029          | 0.112          | 0.009          | 0.060          | 0.037          | 0.093          | -0.005         | 0.039          |
| R28      | -0.160         | -0.074         | -0.188         | -0.045         | -0.071         | -0.172         | -0.109         | 0.028          |
| R29      | 0.008          | 0.113          | 0.015          | 0.062          | 0.010          | 0.109          | 0.011          | 0.051          |
| R3       | 0.015          | 0.111          | -0.023         | 0.117          | 0.025          | 0.119          | 0.071          | 0.103          |
| R30      | 0.035          | 0.106          | 0.014          | 0.080          | 0.026          | 0.139          | 0.029          | 0.067          |
| R31      | 0.014          | 0.083          | 0.015          | 0.031          | 0.035          | 0.120          | -0.015         | 0.010          |
| R32      | 0.064          | 0.104          | 0.065          | 0.095          | 0.020          | 0.094          | 0.048          | 0.043          |
| R33      | -0.017         | 0.088          | 0.041          | 0.014          | -0.005         | 0.093          | 0.018          | 0.000          |
| R34      | 0.012          | 0.085          | 0.000          | 0.033          | 0.022          | 0.087          | 0.026          | 0.023          |
| R35      | -0.004         | 0.138          | 0.055          | 0.070          | -0.004         | 0.076          | 0.076          | 0.054          |
| R36      | -0.039         | 0.125          | 0.105          | 0.080          | -0.014         | 0.130          | 0.069          | 0.088          |
| R37      | -0.024         | 0.085          | 0.006          | 0.056          | -0.018         | 0.050          | -0.036         | 0.024          |
| R38      | -0.019         | 0.096          | 0.069          | 0.066          | -0.245         | 0.085          | 0.020          | 0.063          |
| R39      | -0.009         | 0.076          | 0.026          | 0.037          | -0.001         | 0.080          | 0.006          | 0.040          |
| R4       | -0.033         | 0.061          | -0.002         | 0.058          | 0.004          | 0.084          | 0.023          | 0.040          |
| R40      | 0.019          | 0.066          | -0.008         | -0.001         | 0.004          | 0.059          | -0.020         | 0.011          |
| R41      | 0.021          | 0.083          | 0.065          | 0.071          | 0.010          | 0.084          | 0.046          | 0.063          |
| R42      | 0.044          | 0.099          | 0.085          | 0.077          | 0.022          | 0.099          | 0.109          | 0.057          |
| R43      | 0.039          | 0.098          | 0.073          | 0.037          | 0.013          | 0.111          | 0.061          | 0.041          |
| R44      | 0.017          | 0.086          | 0.076          | 0.007          | 0.015          | 0.097          | 0.053          | 0.000          |
| R45      | 0.037          | 0.092          | 0.068          | 0.084          | 0.041          | 0.099          | 0.073          | 0.103          |
| R46      | 0.010          | 0.077          | -0.014         | 0.048          | 0.007          | 0.083          | -0.025         | 0.029          |
| R47      | 0.028          | 0.108          | 0.021          | 0.013          | 0.021          | 0.098          | -0.009         | 0.016          |
| R48      | -0.075         | 0.047          | -0.027         | 0.000          | -0.048         | 0.039          | -0.043         | -0.002         |
| R49      | -0.025         | 0.036          | -0.013         | -0.026         | -0.073         | 0.038          | -0.012         | -0.025         |
| R5       | -0.027         | 0.080          | -0.106         | 0.050          | 0.002          | 0.079          | 0.028          | 0.012          |
| R50      | -0.037         | 0.061          | -0.063         | 0.006          | -0.023         | 0.054          | -0.043         | -0.013         |
| R51      | -0.183         | 0.006          | -0.108         | -0.015         | -0.101         | -0.037         | -0.052         | -0.013         |
| R52      | -0.084         | 0.061          | 0.018          | -0.009         | -0.087         | 0.037          | -0.006         | 0.008          |

|                         |              |              |              |              |              |              |              |              |
|-------------------------|--------------|--------------|--------------|--------------|--------------|--------------|--------------|--------------|
| R53                     | 0.012        | 0.077        | -0.061       | 0.024        | -0.003       | 0.077        | -0.001       | 0.014        |
| R54                     | 0.012        | -0.039       | 0.031        | 0.052        | -0.135       | -0.160       | 0.063        | 0.060        |
| R55                     | -0.078       | 0.048        | -0.025       | 0.038        | -0.056       | 0.032        | 0.044        | -0.002       |
| R56                     | -0.159       | 0.042        | -0.150       | 0.003        | -0.125       | 0.097        | -0.034       | 0.004        |
| R6                      | -0.045       | 0.089        | 0.001        | 0.051        | 0.019        | 0.084        | 0.041        | 0.018        |
| R7                      | 0.004        | 0.097        | 0.049        | 0.060        | 0.015        | 0.093        | 0.056        | 0.034        |
| R8                      | -0.045       | 0.077        | 0.017        | 0.055        | -0.030       | 0.075        | 0.038        | 0.043        |
| R9                      | -0.016       | 0.091        | 0.013        | 0.061        | 0.000        | 0.092        | 0.026        | 0.058        |
| <b>average<br/>RMSE</b> | <b>0.069</b> | <b>0.099</b> | <b>0.059</b> | <b>0.066</b> | <b>0.064</b> | <b>0.100</b> | <b>0.048</b> | <b>0.048</b> |

Table S57. Elevation from GCPs (Elevation column) and elevation values extracted at each corresponding point from 10-point-spacing-DEMs for the eight missions; each DEM is identified by the number of its mission in the column header (01\_10ps means 10-point-spacing-DEM from mission 1). Elevation values are expressed in ellipsoidal height.

| Point Id | species                    | Elevation (m) | 01_10p<br>s | 02_10p<br>s | 03_10p<br>s | 04_10p<br>s | 05_10p<br>s | 06_10p<br>s | 07_10p<br>s | 08_10p<br>s |
|----------|----------------------------|---------------|-------------|-------------|-------------|-------------|-------------|-------------|-------------|-------------|
| B3       | Sarcocornia                | 46.17         | 46.27       | 46.29       | 46.27       | 46.35       | 46.18       | 46.26       | 46.21       | 46.18       |
| C1       | peeled area                | 46.21         | 46.17       | 46.30       | 46.24       | 46.26       | 46.15       | 46.24       | 46.19       | 46.19       |
| C2       | peeled area                | 46.21         | 46.17       | 46.31       | 46.26       | 46.26       | 46.16       | 46.25       | 46.19       | 46.19       |
| C3       | peeled area                | 46.11         | 46.07       | 46.15       | 46.15       | 46.17       | 45.95       | 46.06       | 46.06       | 46.03       |
| C4       | peeled area                | 46.05         | 46.07       | 46.13       | 46.12       | 46.15       | 45.94       | 46.04       | 46.06       | 46.03       |
| R1       | base                       | 47.45         | 47.44       | 47.46       | 47.45       | 47.47       | 47.42       | 47.51       | 47.50       | 47.49       |
| R10      | Salicornia                 | 46.11         | 46.09       | 46.22       | 46.17       | 46.19       | 46.13       | 46.22       | 46.17       | 46.17       |
| R11      | Salicornia                 | 46.06         | 46.03       | 46.17       | 45.97       | 46.08       | 45.97       | 46.10       | 46.10       | 46.09       |
| R12      | Salicornia                 | 46.13         | 46.08       | 46.22       | 46.14       | 46.19       | 46.11       | 46.22       | 46.16       | 46.14       |
| R13      | Sarcocornia                | 46.06         | 46.11       | 46.21       | 46.15       | 46.17       | 46.12       | 46.22       | 46.13       | 46.15       |
| R14      | Sarcocornia                | 46.17         | 46.17       | 46.25       | 46.15       | 46.26       | 46.17       | 46.26       | 46.21       | 46.18       |
| R15      | Sarcocornia+Sp<br>orobolus | 46.17         | 46.25       | 46.31       | 46.16       | 46.28       | 46.26       | 46.32       | 46.20       | 46.27       |
| R16      | Sarcocornia                | 46.20         | 46.18       | 46.30       | 46.25       | 46.26       | 46.22       | 46.27       | 46.22       | 46.25       |
| R17      | Sarcocornia                | 46.19         | 46.15       | 46.12       | 46.03       | 46.27       | 46.21       | 46.22       | 46.09       | 46.26       |
| R18      | Sarcocornia                | 46.21         | 46.25       | 46.33       | 46.25       | 46.31       | 46.23       | 46.33       | 46.29       | 46.28       |
| R19      | Sarcocornia                | 46.13         | 46.13       | 46.24       | 46.15       | 46.20       | 46.14       | 46.25       | 46.21       | 46.16       |
| R2       | Salicornia                 | 46.18         | 46.14       | 46.24       | 46.15       | 46.21       | 46.14       | 46.25       | 46.17       | 46.21       |
| R20      | Sarcocornia                | 46.15         | 46.17       | 46.22       | 46.20       | 46.25       | 46.13       | 46.27       | 46.22       | 46.21       |
| R21      | Sarcocornia                | 46.16         | 46.17       | 46.26       | 46.21       | 46.23       | 46.12       | 46.26       | 46.19       | 46.20       |
| R22      | Sarcocornia                | 46.12         | 46.14       | 46.23       | 46.15       | 46.20       | 46.13       | 46.25       | 46.14       | 46.18       |
| R23      | Sarcocornia                | 46.09         | 46.08       | 46.21       | 46.12       | 46.15       | 46.09       | 46.20       | 46.10       | 46.13       |
| R24      | Sarcocornia                | 46.05         | 46.05       | 46.09       | 46.04       | 46.07       | 45.96       | 46.01       | 46.02       | 46.08       |
| R25      | Sarcocornia                | 46.16         | 46.15       | 46.27       | 46.21       | 46.22       | 46.17       | 46.27       | 46.22       | 46.20       |
| R26      | Sarcocornia                | 46.14         | 45.92       | 45.86       | 46.06       | 46.23       | 45.93       | 45.90       | 46.15       | 46.18       |
| R27      | Sarcocornia                | 46.13         | 46.16       | 46.25       | 46.13       | 46.19       | 46.15       | 46.23       | 46.13       | 46.17       |
| R28      | Sarcocornia                | 46.14         | 46.10       | 46.14       | 45.98       | 46.19       | 46.10       | 46.04       | 46.15       | 46.13       |
| R29      | Sarcocornia                | 46.18         | 46.19       | 46.29       | 46.20       | 46.25       | 46.19       | 46.29       | 46.20       | 46.23       |
| R3       | Salicornia                 | 46.12         | 46.15       | 46.24       | 46.14       | 46.23       | 46.14       | 46.24       | 46.15       | 46.22       |
| R30      | Sarcocornia                | 46.14         | 46.16       | 46.27       | 46.22       | 46.22       | 46.17       | 46.27       | 46.19       | 46.21       |
| R31      | Sarcocornia                | 46.19         | 46.20       | 46.29       | 46.20       | 46.22       | 46.21       | 46.29       | 46.18       | 46.20       |
| R32      | Sarcocornia                | 46.19         | 46.25       | 46.29       | 46.25       | 46.27       | 46.22       | 46.30       | 46.28       | 46.23       |
| R33      | Sarcocornia                | 46.15         | 46.15       | 46.25       | 46.19       | 46.17       | 46.15       | 46.25       | 46.17       | 46.16       |
| R34      | Sarcocornia                | 46.17         | 46.19       | 46.26       | 46.17       | 46.21       | 46.19       | 46.25       | 46.20       | 46.19       |
| R35      | Sarcocornia                | 45.99         | 45.99       | 46.09       | 46.04       | 46.03       | 45.99       | 46.03       | 46.07       | 46.06       |
| R36      | Sarcocornia                | 46.10         | 46.01       | 46.18       | 46.19       | 46.18       | 46.08       | 46.22       | 46.18       | 46.17       |
| R37      | Sarcocornia                | 45.99         | 45.99       | 46.07       | 46.00       | 46.05       | 45.95       | 46.05       | 45.98       | 46.04       |
| R38      | Sarcocornia                | 45.95         | 45.96       | 46.04       | 45.93       | 46.00       | 45.69       | 45.97       | 45.92       | 46.03       |
| R39      | Sarcocornia                | 46.11         | 46.12       | 46.19       | 46.11       | 46.16       | 46.11       | 46.18       | 46.14       | 46.15       |
| R4       | Salicornia                 | 46.14         | 46.12       | 46.21       | 46.11       | 46.19       | 46.15       | 46.22       | 46.16       | 46.17       |
| R40      | Sarcocornia                | 46.11         | 46.12       | 46.19       | 46.09       | 46.13       | 46.10       | 46.17       | 46.07       | 46.12       |
| R41      | Sarcocornia                | 46.12         | 46.14       | 46.20       | 46.15       | 46.17       | 46.13       | 46.20       | 46.17       | 46.18       |
| R42      | Sarcocornia                | 46.15         | 46.20       | 46.24       | 46.24       | 46.22       | 46.17       | 46.24       | 46.25       | 46.20       |
| R43      | Sarcocornia+Sp<br>orobolus | 46.14         | 46.21       | 46.25       | 46.19       | 46.18       | 46.17       | 46.23       | 46.15       | 46.18       |
| R44      | Sarcocornia                | 46.08         | 46.10       | 46.16       | 46.14       | 46.09       | 46.08       | 46.17       | 46.13       | 46.08       |
| R45      | Sarcocornia                | 46.08         | 46.11       | 46.15       | 46.16       | 46.17       | 46.11       | 46.17       | 46.14       | 46.18       |
| R46      | Salicornia                 | 46.09         | 46.09       | 46.17       | 46.06       | 46.15       | 46.09       | 46.17       | 46.08       | 46.12       |
| R47      | Salicornia                 | 46.01         | 46.04       | 46.12       | 46.03       | 46.04       | 46.05       | 46.10       | 46.00       | 46.04       |
| R48      | Salicornia                 | 45.94         | 45.87       | 45.99       | 45.88       | 45.93       | 45.89       | 45.99       | 45.91       | 45.92       |
| R49      | Salicornia                 | 45.92         | 45.84       | 45.94       | 45.88       | 45.88       | 45.84       | 45.95       | 45.89       | 45.87       |
| R5       | Salicornia                 | 46.11         | 46.08       | 46.19       | 46.07       | 46.16       | 46.11       | 46.20       | 46.16       | 46.13       |
| R50      | Salicornia                 | 46.04         | 46.00       | 46.08       | 45.97       | 46.04       | 46.01       | 46.09       | 46.01       | 46.04       |
| R51      | Salicornia                 | 46.00         | 45.80       | 45.99       | 45.93       | 45.99       | 45.90       | 45.96       | 45.96       | 45.98       |
| R52      | Salicornia                 | 45.96         | 45.89       | 46.00       | 45.96       | 45.95       | 45.88       | 46.00       | 45.94       | 45.95       |

|     |             |       |       |       |       |       |       |       |       |       |
|-----|-------------|-------|-------|-------|-------|-------|-------|-------|-------|-------|
| R53 | Sarcocornia | 46.07 | 46.09 | 46.14 | 45.99 | 46.11 | 46.09 | 46.13 | 46.08 | 46.09 |
| R54 | Sarcocornia | 45.92 | 45.94 | 45.91 | 45.93 | 45.97 | 45.77 | 45.83 | 45.97 | 45.95 |
| R55 | Sarcocornia | 45.98 | 45.90 | 46.04 | 45.97 | 46.02 | 45.95 | 46.04 | 45.99 | 45.98 |
| R56 | Sarcocornia | 45.85 | 45.75 | 45.96 | 45.73 | 45.86 | 45.70 | 45.86 | 45.78 | 45.84 |
| R6  | Salicornia  | 46.11 | 46.08 | 46.19 | 46.11 | 46.17 | 46.13 | 46.20 | 46.15 | 46.14 |
| R7  | Salicornia  | 46.09 | 46.09 | 46.18 | 46.13 | 46.15 | 46.11 | 46.19 | 46.14 | 46.13 |
| R8  | Salicornia  | 46.09 | 46.05 | 46.16 | 46.11 | 46.14 | 46.07 | 46.16 | 46.14 | 46.13 |
| R9  | Salicornia  | 46.05 | 46.03 | 46.14 | 46.05 | 46.12 | 46.05 | 46.14 | 46.09 | 46.11 |

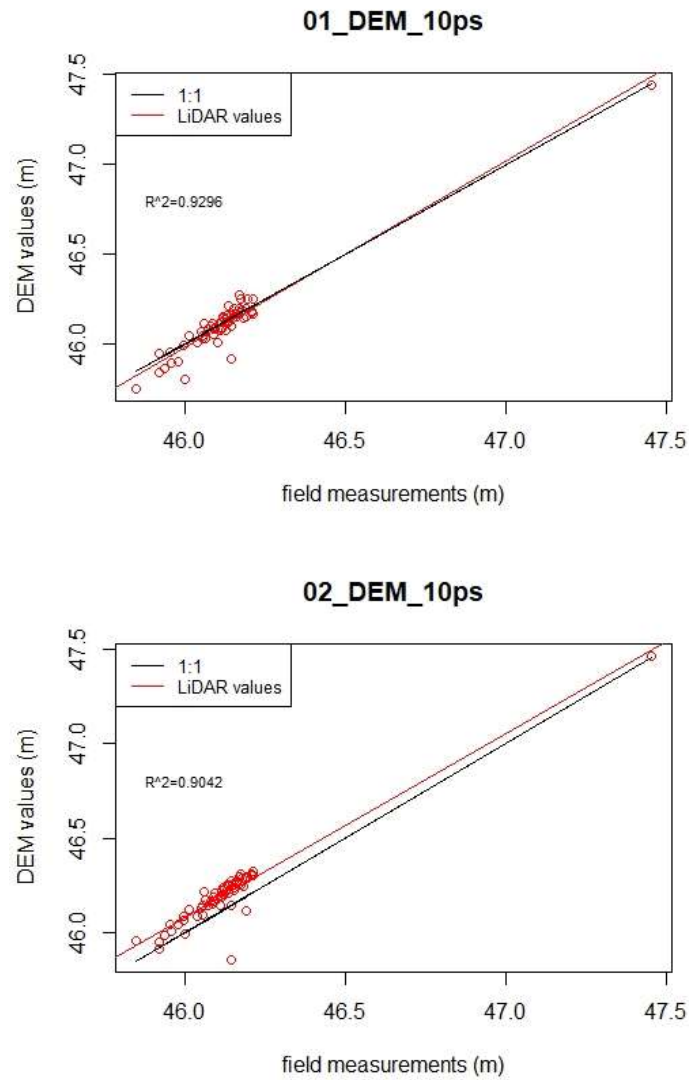

Figure S18. (Continue)

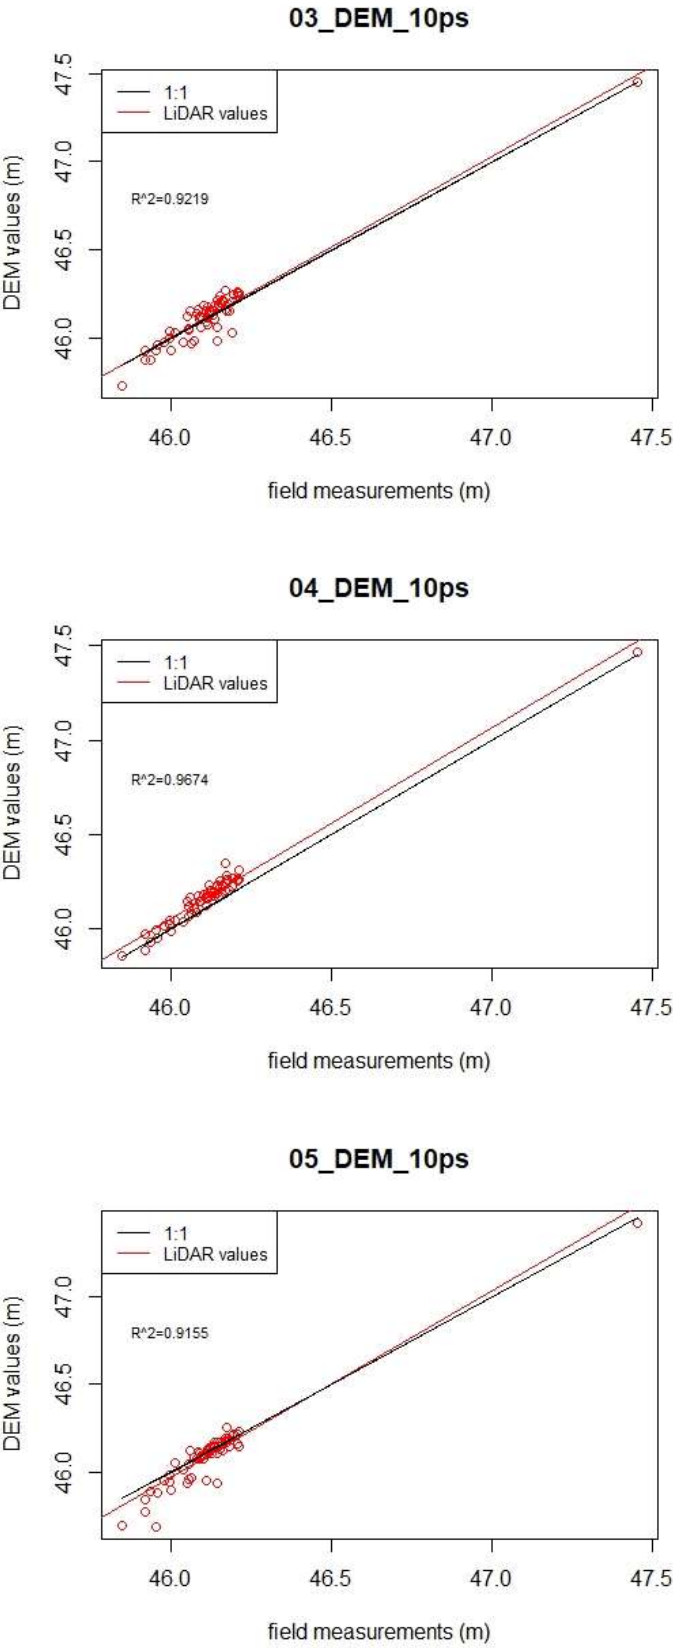

Figure S18. (Continue)

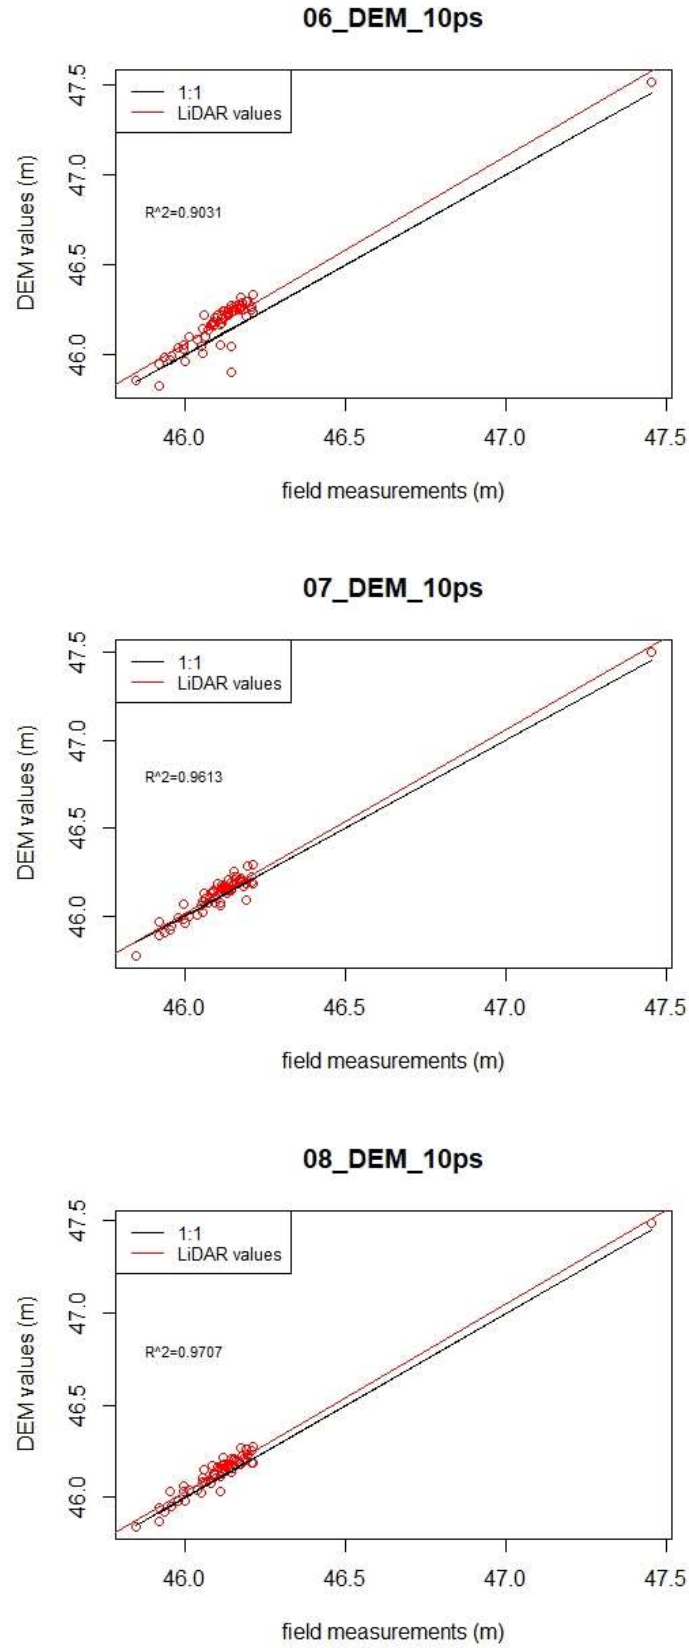

Figure S18. Linear regression and  $R^2$  value for 10-point-spacing-DEMs values from the eight missions compared to GCPs. The red line is the regression line for the compared datasets, the black line represents the 1:1 pattern.

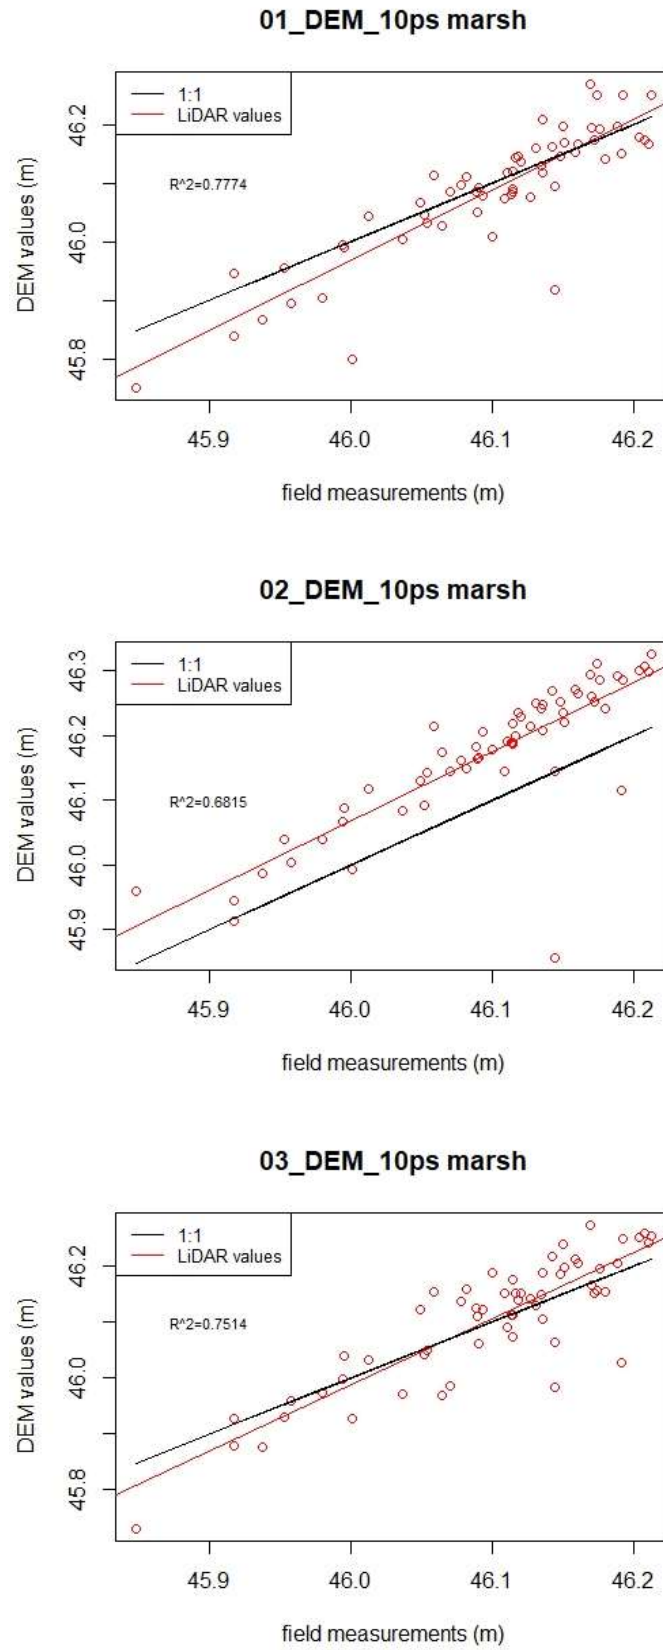

Figure S19. (Continue)

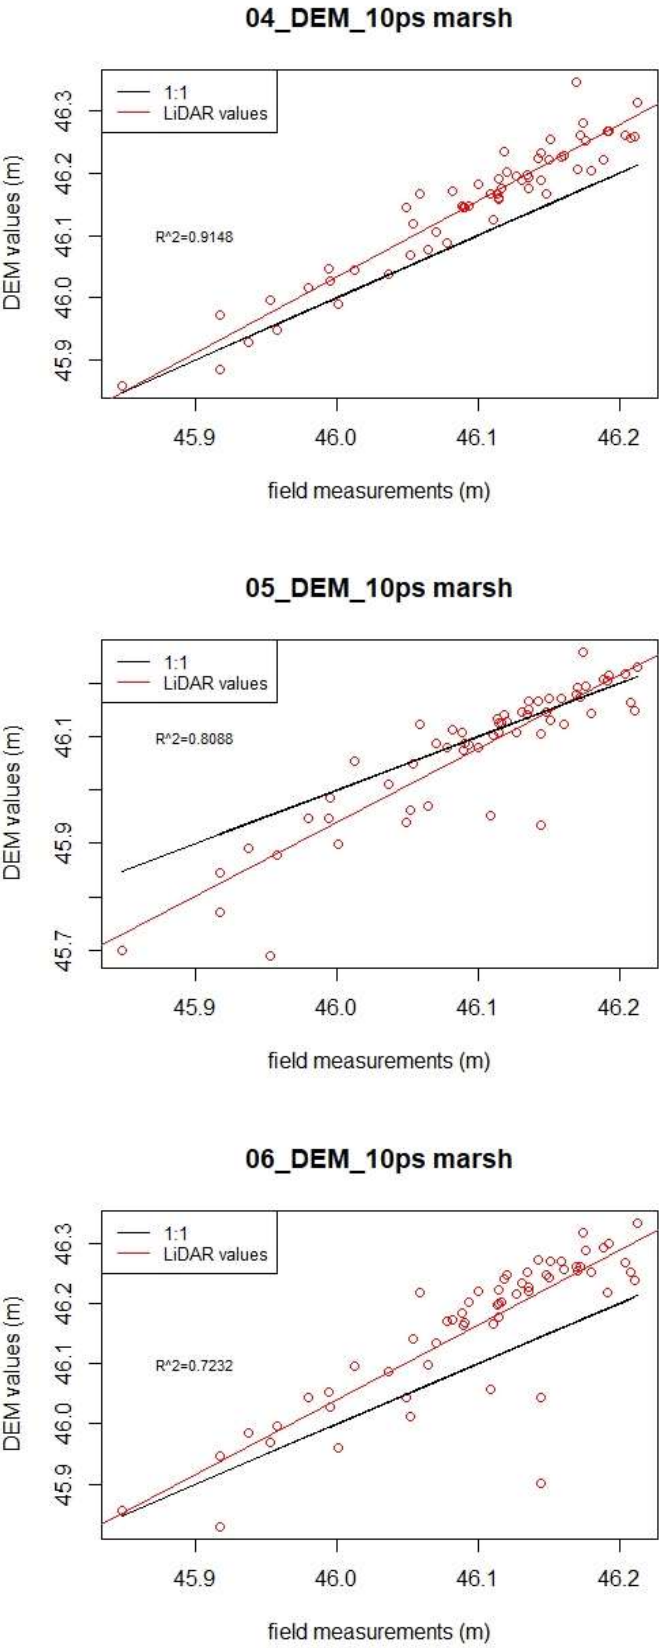

Figure S19. (Continue)

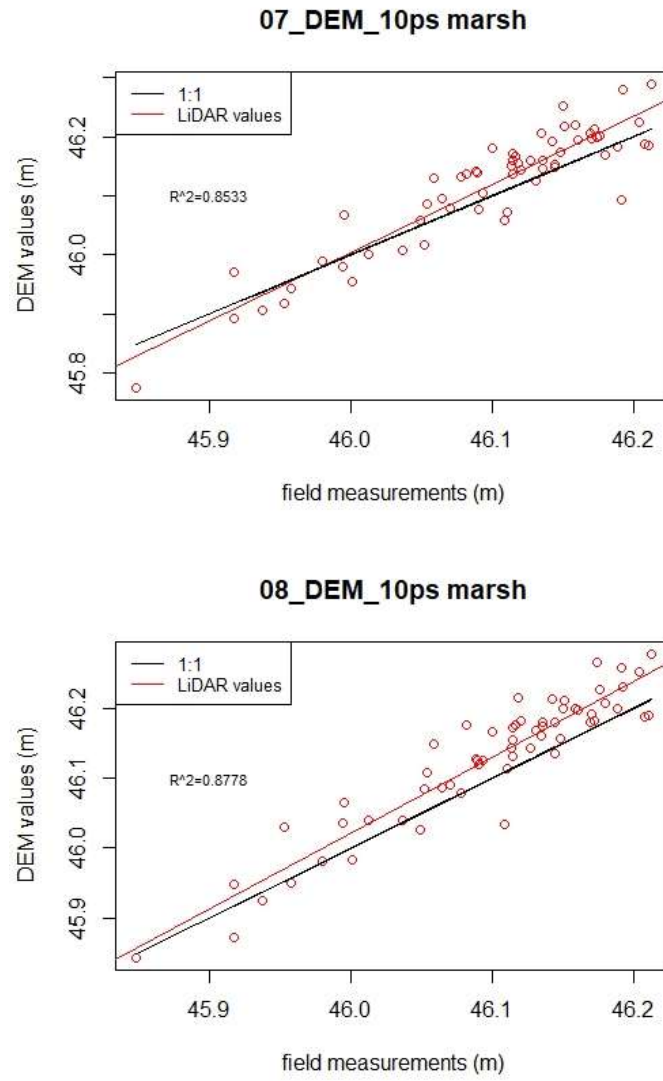

Figure S19. Linear regression and  $R^2$  values for 10-point-spacing-DEMs values from the eight missions compared to GCPs using only points situated on the marsh surface. The red line is the regression line for the compared datasets, the black line represents the 1:1 pattern.

Table S58. Difference in elevation at each point between 10-point-spacing-DEMs value and GCP value for DEMs derived from the eight missions.

| Point Id | 01_DEM_<br>10ps | 02_DEM_<br>10ps | 03_DEM_<br>10ps | 04_DEM_<br>10ps | 05_DEM_<br>10ps | 06_DEM_<br>10ps | 07_DEM_<br>10ps | 08_DEM_<br>10ps |
|----------|-----------------|-----------------|-----------------|-----------------|-----------------|-----------------|-----------------|-----------------|
| B3       | 0.099           | 0.124           | 0.103           | 0.176           | 0.010           | 0.091           | 0.035           | 0.011           |
| C1       | -0.043          | 0.088           | 0.031           | 0.047           | -0.063          | 0.028           | -0.026          | -0.020          |
| C2       | -0.033          | 0.099           | 0.051           | 0.048           | -0.045          | 0.045           | -0.020          | -0.020          |
| C3       | -0.036          | 0.036           | 0.043           | 0.057           | -0.157          | -0.052          | -0.050          | -0.075          |
| C4       | 0.017           | 0.082           | 0.074           | 0.096           | -0.110          | -0.005          | 0.010           | -0.023          |
| R1       | -0.012          | 0.010           | -0.001          | 0.014           | -0.032          | 0.061           | 0.047           | 0.034           |
| R2       | -0.038          | 0.062           | -0.025          | 0.025           | -0.036          | 0.073           | -0.011          | 0.027           |
| R3       | 0.028           | 0.117           | 0.020           | 0.116           | 0.022           | 0.123           | 0.036           | 0.097           |
| R4       | -0.018          | 0.073           | -0.030          | 0.058           | 0.014           | 0.084           | 0.025           | 0.038           |
| R5       | -0.029          | 0.076           | -0.040          | 0.047           | -0.005          | 0.087           | 0.047           | 0.017           |
| R6       | -0.034          | 0.076           | -0.002          | 0.053           | 0.018           | 0.083           | 0.037           | 0.029           |
| R7       | -0.003          | 0.095           | 0.036           | 0.058           | 0.018           | 0.097           | 0.053           | 0.038           |
| R8       | -0.039          | 0.073           | 0.019           | 0.054           | -0.016          | 0.074           | 0.049           | 0.035           |
| R9       | -0.023          | 0.088           | -0.004          | 0.065           | -0.006          | 0.088           | 0.032           | 0.054           |
| R10      | -0.026          | 0.104           | 0.060           | 0.075           | 0.011           | 0.108           | 0.057           | 0.057           |
| R11      | -0.036          | 0.110           | -0.094          | 0.014           | -0.094          | 0.034           | 0.031           | 0.022           |
| R12      | -0.053          | 0.087           | 0.015           | 0.067           | -0.021          | 0.087           | 0.032           | 0.016           |
| R13      | 0.055           | 0.155           | 0.095           | 0.108           | 0.065           | 0.160           | 0.072           | 0.091           |
| R14      | 0.002           | 0.080           | -0.020          | 0.089           | 0.001           | 0.090           | 0.040           | 0.010           |
| R15      | 0.076           | 0.136           | -0.019          | 0.106           | 0.083           | 0.143           | 0.025           | 0.091           |
| R16      | -0.027          | 0.097           | 0.046           | 0.056           | 0.013           | 0.063           | 0.020           | 0.048           |
| R17      | -0.041          | -0.076          | -0.163          | 0.076           | 0.014           | 0.026           | -0.098          | 0.067           |
| R18      | 0.037           | 0.113           | 0.041           | 0.101           | 0.018           | 0.120           | 0.076           | 0.065           |
| R19      | -0.005          | 0.106           | 0.015           | 0.062           | 0.006           | 0.116           | 0.072           | 0.026           |
| R20      | 0.017           | 0.069           | 0.046           | 0.102           | -0.022          | 0.117           | 0.066           | 0.059           |
| R21      | 0.006           | 0.104           | 0.044           | 0.068           | -0.039          | 0.096           | 0.033           | 0.038           |
| R22      | 0.015           | 0.108           | 0.030           | 0.080           | 0.006           | 0.126           | 0.023           | 0.061           |
| R23      | -0.015          | 0.113           | 0.029           | 0.053           | -0.008          | 0.108           | 0.011           | 0.032           |
| R24      | -0.006          | 0.041           | -0.010          | 0.017           | -0.091          | -0.040          | -0.035          | 0.032           |
| R25      | -0.006          | 0.112           | 0.054           | 0.066           | 0.013           | 0.112           | 0.060           | 0.041           |
| R26      | -0.227          | -0.288          | -0.082          | 0.087           | -0.211          | -0.243          | 0.007           | 0.035           |
| R27      | 0.028           | 0.119           | -0.001          | 0.058           | 0.014           | 0.102           | -0.005          | 0.037           |
| R28      | -0.050          | -0.001          | -0.162          | 0.044           | -0.040          | -0.100          | 0.003           | -0.010          |
| R29      | 0.016           | 0.111           | 0.020           | 0.076           | 0.018           | 0.113           | 0.025           | 0.051           |
| R30      | 0.020           | 0.128           | 0.075           | 0.082           | 0.025           | 0.130           | 0.050           | 0.071           |
| R31      | 0.007           | 0.103           | 0.015           | 0.033           | 0.018           | 0.104           | -0.005          | 0.011           |
| R32      | 0.058           | 0.094           | 0.055           | 0.074           | 0.023           | 0.106           | 0.087           | 0.038           |
| R33      | -0.003          | 0.104           | 0.037           | 0.018           | -0.001          | 0.099           | 0.025           | 0.010           |
| R34      | 0.024           | 0.089           | -0.006          | 0.035           | 0.021           | 0.083           | 0.026           | 0.021           |
| R35      | -0.005          | 0.093           | 0.045           | 0.031           | -0.010          | 0.033           | 0.072           | 0.070           |
| R36      | -0.091          | 0.078           | 0.088           | 0.082           | -0.021          | 0.121           | 0.080           | 0.066           |
| R37      | 0.001           | 0.072           | 0.003           | 0.053           | -0.048          | 0.059           | -0.014          | 0.042           |

|                         |              |              |              |              |              |              |              |              |
|-------------------------|--------------|--------------|--------------|--------------|--------------|--------------|--------------|--------------|
| R38                     | 0.003        | 0.088        | -0.023       | 0.043        | -0.263       | 0.017        | -0.035       | 0.077        |
| R39                     | 0.005        | 0.072        | -0.003       | 0.043        | -0.008       | 0.063        | 0.022        | 0.040        |
| R40                     | 0.007        | 0.081        | -0.021       | 0.014        | -0.008       | 0.056        | -0.039       | 0.004        |
| R41                     | 0.028        | 0.084        | 0.035        | 0.059        | 0.009        | 0.086        | 0.050        | 0.060        |
| R42                     | 0.046        | 0.086        | 0.090        | 0.071        | 0.021        | 0.093        | 0.101        | 0.050        |
| R43                     | 0.073        | 0.113        | 0.052        | 0.039        | 0.030        | 0.091        | 0.009        | 0.044        |
| R44                     | 0.020        | 0.084        | 0.060        | 0.010        | 0.001        | 0.093        | 0.054        | 0.000        |
| R45                     | 0.029        | 0.067        | 0.077        | 0.090        | 0.031        | 0.091        | 0.056        | 0.094        |
| R46                     | 0.001        | 0.076        | -0.029       | 0.055        | -0.003       | 0.077        | -0.014       | 0.028        |
| R47                     | 0.030        | 0.105        | 0.020        | 0.031        | 0.040        | 0.084        | -0.012       | 0.027        |
| R48                     | -0.071       | 0.050        | -0.060       | -0.008       | -0.046       | 0.049        | -0.030       | -0.012       |
| R49                     | -0.078       | 0.028        | -0.039       | -0.032       | -0.073       | 0.030        | -0.025       | -0.045       |
| R50                     | -0.034       | 0.047        | -0.065       | 0.000        | -0.025       | 0.049        | -0.029       | 0.002        |
| R51                     | -0.202       | -0.007       | -0.074       | -0.011       | -0.102       | -0.041       | -0.046       | -0.018       |
| R52                     | -0.064       | 0.046        | 0.000        | -0.010       | -0.079       | 0.038        | -0.014       | -0.008       |
| R53                     | 0.015        | 0.073        | -0.086       | 0.035        | 0.016        | 0.063        | 0.007        | 0.019        |
| R54                     | 0.027        | -0.004       | 0.010        | 0.055        | -0.147       | -0.088       | 0.052        | 0.029        |
| R55                     | -0.077       | 0.059        | -0.007       | 0.036        | -0.032       | 0.063        | 0.008        | 0.001        |
| R56                     | -0.097       | 0.111        | -0.117       | 0.011        | -0.149       | 0.008        | -0.073       | -0.005       |
| <b>average<br/>RMSE</b> | <b>0.056</b> | <b>0.096</b> | <b>0.058</b> | <b>0.064</b> | <b>0.067</b> | <b>0.091</b> | <b>0.045</b> | <b>0.045</b> |

Table S59. Elevation from GCPs (Elevation column) and elevation values extracted at each corresponding point from 15-point-spacing-DEMs for the eight missions; each DEM is identified by the number of its mission in the column header (01\_15ps means 15-point-spacing-DEM from mission 1). Elevation values are expressed in ellipsoidal height.

| Point Id | species                | Elevation (m) | 01_15 ps | 02_15 ps | 03_15 ps | 04_15 ps | 05_15 ps | 06_15 ps | 07_15 ps | 08_15 ps |
|----------|------------------------|---------------|----------|----------|----------|----------|----------|----------|----------|----------|
| B3       | Sarcocornia            | 46.17         | 46.18    | 46.27    | 46.12    | 46.31    | 46.18    | 46.24    | 46.12    | 46.17    |
| C1       | peeled area            | 46.21         | 46.13    | 46.28    | 46.00    | 46.23    | 46.13    | 46.21    | 46.10    | 46.17    |
| C2       | peeled area            | 46.21         | 46.15    | 46.28    | 46.06    | 46.24    | 46.13    | 46.21    | 46.13    | 46.17    |
| C3       | peeled area            | 46.11         | 46.06    | 46.12    | 45.94    | 46.13    | 45.92    | 46.03    | 45.99    | 46.02    |
| C4       | peeled area            | 46.05         | 46.06    | 46.12    | 45.88    | 46.12    | 45.94    | 46.03    | 45.98    | 46.01    |
| R1       | base                   | 47.45         | 47.15    | 47.43    | 47.28    | 47.40    | 47.23    | 47.46    | 47.24    | 47.45    |
| R10      | Salicornia             | 46.11         | 46.09    | 46.19    | 45.95    | 46.16    | 46.10    | 46.19    | 46.07    | 46.14    |
| R11      | Salicornia             | 46.06         | 45.74    | 46.13    | 45.97    | 45.92    | 45.97    | 46.03    | 46.02    | 46.08    |
| R12      | Salicornia             | 46.13         | 46.07    | 46.19    | 45.89    | 46.15    | 46.09    | 46.18    | 46.09    | 46.13    |
| R13      | Sarcocornia            | 46.06         | 46.10    | 46.19    | 45.96    | 46.16    | 46.10    | 46.20    | 46.06    | 46.11    |
| R14      | Sarcocornia            | 46.17         | 46.18    | 46.24    | 46.00    | 46.24    | 46.15    | 46.26    | 46.14    | 46.17    |
| R15      | Sarcocornia+Sporobolus | 46.17         | 46.24    | 46.30    | 46.12    | 46.29    | 46.23    | 46.30    | 46.17    | 46.30    |
| R16      | Sarcocornia            | 46.20         | 46.23    | 46.24    | 45.94    | 46.25    | 46.18    | 46.24    | 46.13    | 46.23    |
| R17      | Sarcocornia            | 46.19         | 46.14    | 46.22    | 46.00    | 46.23    | 46.20    | 46.20    | 46.10    | 46.20    |
| R18      | Sarcocornia            | 46.21         | 46.21    | 46.30    | 46.12    | 46.28    | 46.22    | 46.30    | 46.19    | 46.23    |
| R19      | Sarcocornia            | 46.14         | 46.11    | 46.22    | 46.05    | 46.19    | 46.13    | 46.20    | 46.10    | 46.12    |
| R2       | Salicornia             | 46.18         | 46.12    | 46.22    | 45.92    | 46.18    | 46.12    | 46.23    | 46.09    | 46.16    |
| R20      | Sarcocornia            | 46.15         | 46.13    | 46.18    | 46.06    | 46.19    | 46.04    | 46.27    | 46.15    | 46.20    |
| R21      | Sarcocornia            | 46.16         | 46.09    | 46.20    | 46.03    | 46.21    | 46.12    | 46.23    | 46.11    | 46.17    |
| R22      | Sarcocornia            | 46.12         | 46.11    | 46.21    | 45.95    | 46.21    | 46.12    | 46.19    | 46.13    | 46.19    |
| R23      | Sarcocornia            | 46.09         | 46.06    | 46.19    | 46.04    | 46.14    | 46.05    | 46.17    | 46.08    | 46.12    |
| R24      | Sarcocornia            | 46.05         | 46.02    | 46.12    | 45.91    | 46.04    | 45.93    | 46.11    | 45.93    | 46.05    |
| R25      | Sarcocornia            | 46.16         | 46.15    | 46.24    | 45.85    | 46.22    | 46.14    | 46.24    | 46.13    | 46.19    |
| R26      | Sarcocornia            | 46.14         | 46.10    | 46.22    | 46.05    | 46.17    | 46.07    | 46.14    | 46.06    | 46.17    |
| R27      | Sarcocornia            | 46.13         | 46.16    | 46.22    | 45.91    | 46.18    | 46.13    | 46.19    | 46.07    | 46.15    |
| R28      | Sarcocornia            | 46.14         | 46.08    | 46.12    | 45.96    | 46.17    | 46.08    | 46.24    | 46.02    | 46.14    |
| R29      | Sarcocornia            | 46.18         | 46.16    | 46.24    | 46.07    | 46.21    | 46.16    | 46.26    | 46.12    | 46.18    |
| R3       | Salicornia             | 46.12         | 46.10    | 46.20    | 46.00    | 46.20    | 46.12    | 46.20    | 46.06    | 46.19    |
| R30      | Sarcocornia            | 46.14         | 46.14    | 46.24    | 46.03    | 46.20    | 46.17    | 46.27    | 46.15    | 46.21    |
| R31      | Sarcocornia            | 46.19         | 46.17    | 46.27    | 46.17    | 46.20    | 46.19    | 46.26    | 46.18    | 46.19    |
| R32      | Sarcocornia            | 46.19         | 46.14    | 46.26    | 46.05    | 46.21    | 46.18    | 46.26    | 46.14    | 46.17    |
| R33      | Sarcocornia            | 46.15         | 46.11    | 46.21    | 45.96    | 46.14    | 46.11    | 46.21    | 46.10    | 46.13    |
| R34      | Sarcocornia            | 46.17         | 46.14    | 46.23    | 46.13    | 46.19    | 46.16    | 46.24    | 46.15    | 46.19    |
| R35      | Sarcocornia            | 46.00         | 45.88    | 46.09    | 45.80    | 46.07    | 45.92    | 45.92    | 45.98    | 46.04    |
| R36      | Sarcocornia            | 46.10         | 46.05    | 46.17    | 46.09    | 46.16    | 46.00    | 46.21    | 46.09    | 46.15    |
| R37      | Sarcocornia            | 45.99         | 45.99    | 45.99    | 45.90    | 45.96    | 45.86    | 45.99    | 45.88    | 46.01    |
| R38      | Sarcocornia            | 45.95         | 45.86    | 46.02    | 45.93    | 45.96    | 45.83    | 46.05    | 45.91    | 45.96    |
| R39      | Sarcocornia            | 46.11         | 46.08    | 46.16    | 45.99    | 46.15    | 46.12    | 46.16    | 46.08    | 46.14    |
| R4       | Salicornia             | 46.14         | 46.07    | 46.18    | 45.91    | 46.17    | 46.12    | 46.19    | 46.08    | 46.16    |
| R40      | Sarcocornia            | 46.11         | 46.08    | 46.16    | 46.02    | 46.12    | 46.09    | 46.18    | 46.03    | 46.11    |
| R41      | Sarcocornia            | 46.12         | 46.08    | 46.16    | 46.00    | 46.15    | 46.09    | 46.18    | 46.08    | 46.14    |
| R42      | Sarcocornia            | 46.15         | 46.19    | 46.19    | 46.08    | 46.22    | 46.16    | 46.23    | 46.14    | 46.18    |
| R43      | Sarcocornia+Sporobolus | 46.14         | 46.13    | 46.19    | 45.92    | 46.14    | 46.16    | 46.20    | 46.13    | 46.15    |
| R44      | Sarcocornia            | 46.08         | 46.06    | 46.14    | 46.01    | 46.08    | 46.08    | 46.15    | 46.07    | 46.06    |
| R45      | Sarcocornia            | 46.08         | 46.11    | 46.13    | 45.99    | 46.16    | 46.10    | 46.14    | 46.04    | 46.14    |
| R46      | Salicornia             | 46.09         | 46.06    | 46.14    | 45.99    | 46.12    | 46.07    | 46.14    | 45.98    | 46.09    |
| R47      | Salicornia             | 46.01         | 46.02    | 46.08    | 45.84    | 46.01    | 46.02    | 46.04    | 45.94    | 46.01    |
| R48      | Salicornia             | 45.94         | 45.90    | 45.97    | 45.74    | 45.90    | 45.85    | 45.96    | 45.79    | 45.92    |
| R49      | Salicornia             | 45.92         | 45.81    | 45.89    | 45.70    | 45.84    | 45.83    | 45.91    | 45.79    | 45.82    |

|     |             |       |       |       |       |       |       |       |       |       |
|-----|-------------|-------|-------|-------|-------|-------|-------|-------|-------|-------|
| R5  | Salicornia  | 46.11 | 46.04 | 46.17 | 45.90 | 46.15 | 46.10 | 46.18 | 46.08 | 46.11 |
| R50 | Salicornia  | 46.04 | 45.99 | 46.07 | 45.89 | 46.01 | 45.99 | 46.05 | 45.89 | 46.02 |
| R51 | Salicornia  | 46.00 | 45.94 | 46.01 | 45.72 | 45.96 | 45.89 | 45.99 | 45.89 | 45.97 |
| R52 | Salicornia  | 45.96 | 45.90 | 45.99 | 45.83 | 45.94 | 45.89 | 45.98 | 45.89 | 45.93 |
| R53 | Sarcocornia | 46.07 | 46.06 | 46.10 | 45.98 | 46.08 | 46.06 | 46.11 | 46.02 | 46.07 |
| R54 | Sarcocornia | 45.92 | 45.96 | 45.94 | 45.82 | 45.96 | 45.91 | 45.91 | 45.86 | 45.96 |
| R55 | Sarcocornia | 45.98 | 45.92 | 46.00 | 45.85 | 45.99 | 45.91 | 45.97 | 45.92 | 45.96 |
| R56 | Sarcocornia | 45.85 | 45.72 | 45.83 | 45.65 | 45.83 | 45.69 | 45.83 | 45.77 | 45.79 |
| R6  | Salicornia  | 46.11 | 46.04 | 46.16 | 45.89 | 46.14 | 46.11 | 46.17 | 46.07 | 46.11 |
| R7  | Salicornia  | 46.09 | 46.04 | 46.16 | 45.82 | 46.13 | 46.09 | 46.16 | 46.06 | 46.10 |
| R8  | Salicornia  | 46.09 | 46.03 | 46.14 | 45.96 | 46.12 | 46.05 | 46.12 | 46.01 | 46.11 |
| R9  | Salicornia  | 46.05 | 45.99 | 46.11 | 45.81 | 46.09 | 46.02 | 46.11 | 46.01 | 46.08 |

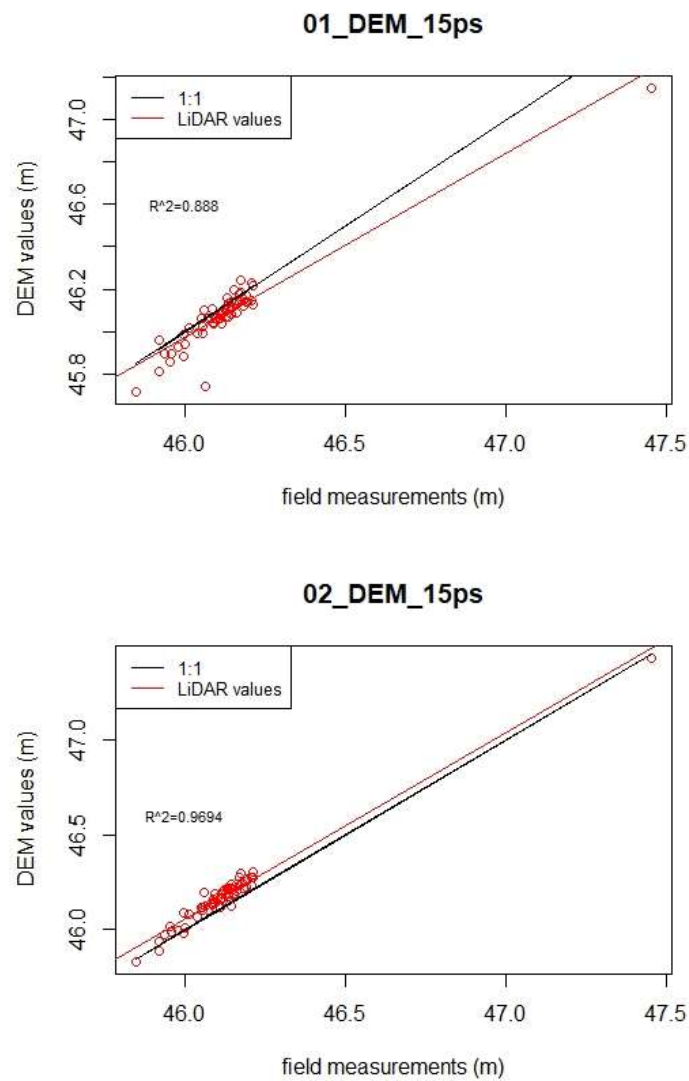

Figure S20. (Continue)

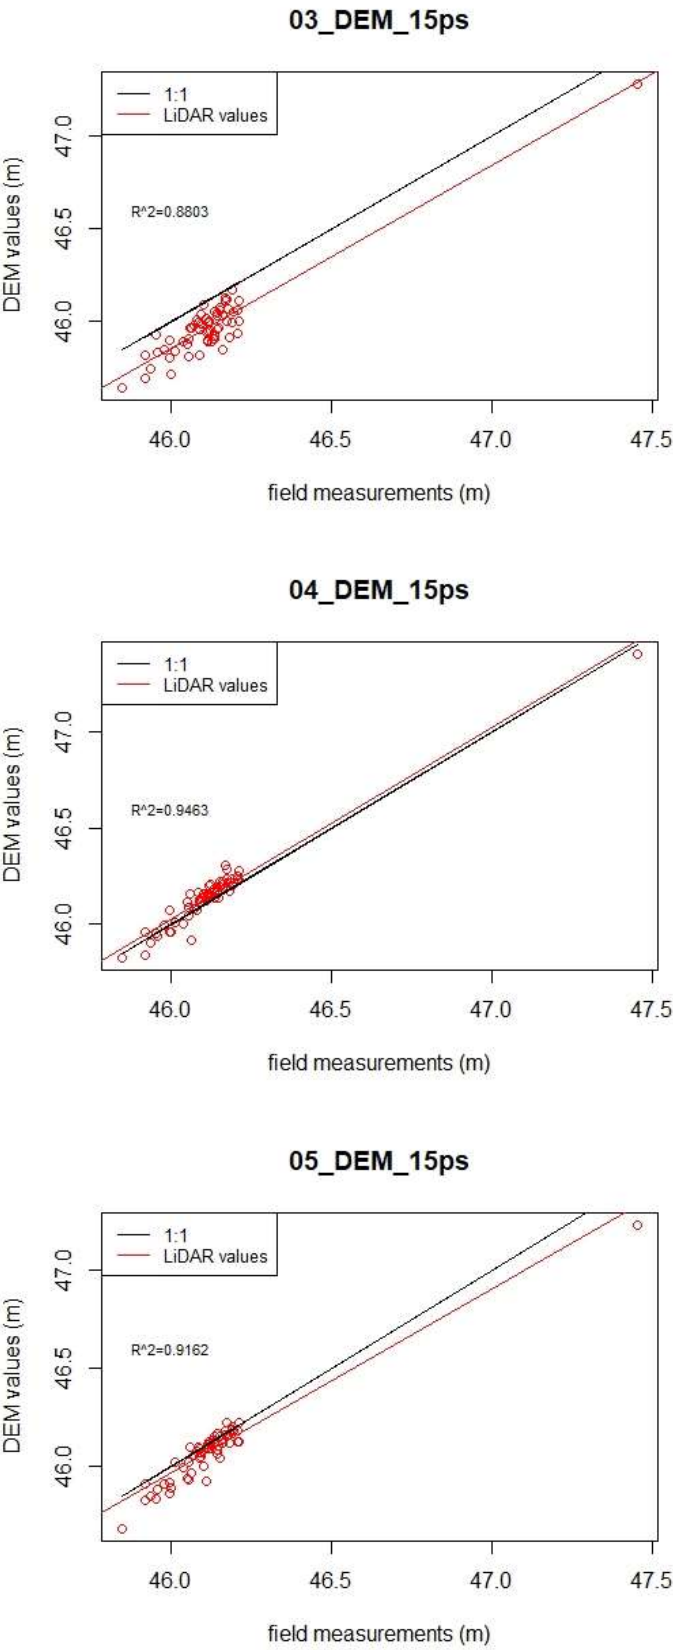

Figure S20. (Continue)

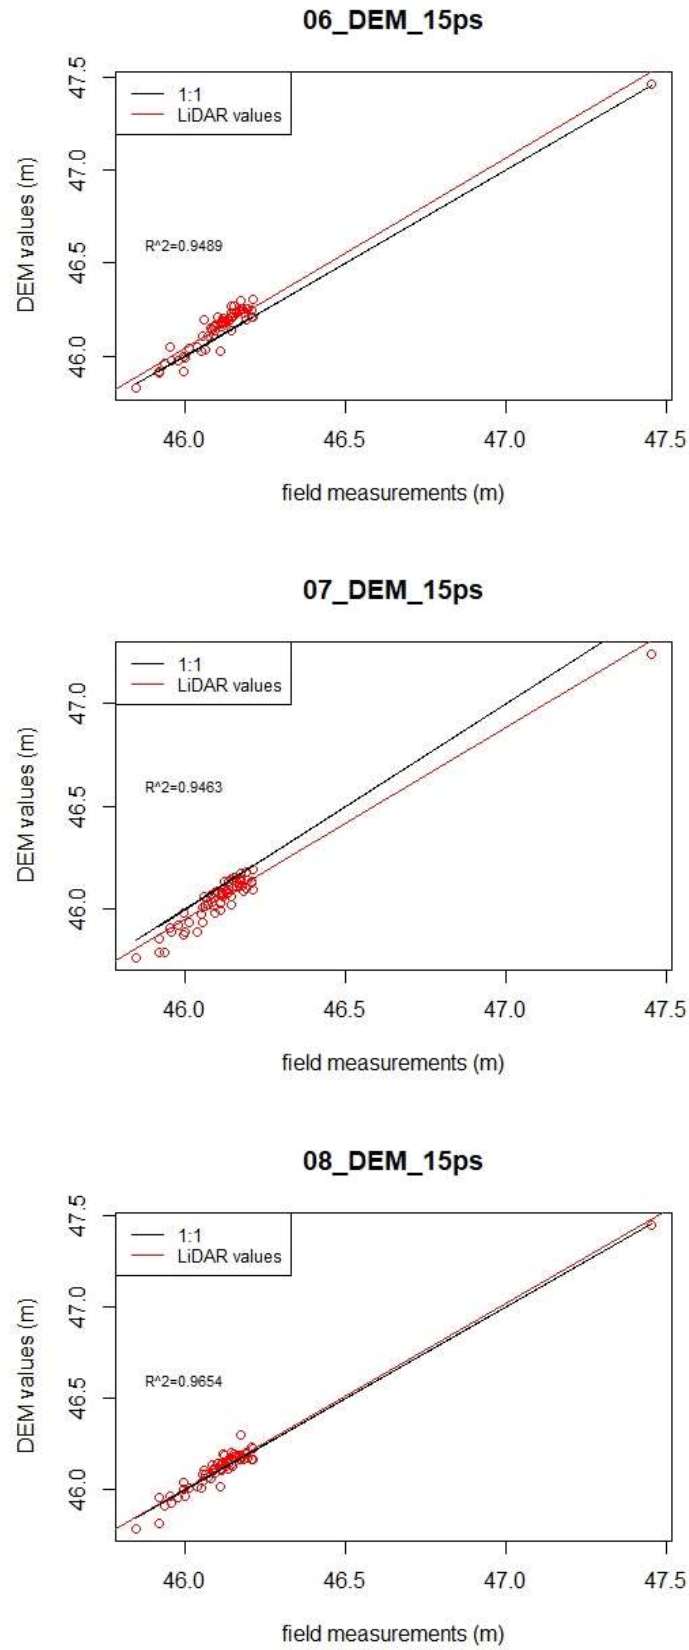

Figure S20. Linear regression and  $R^2$  value for 15-point-spacing-DEMs values from the eight missions compared to GCPs. The red line is the regression line for the compared datasets, the black line represents the 1:1 pattern.

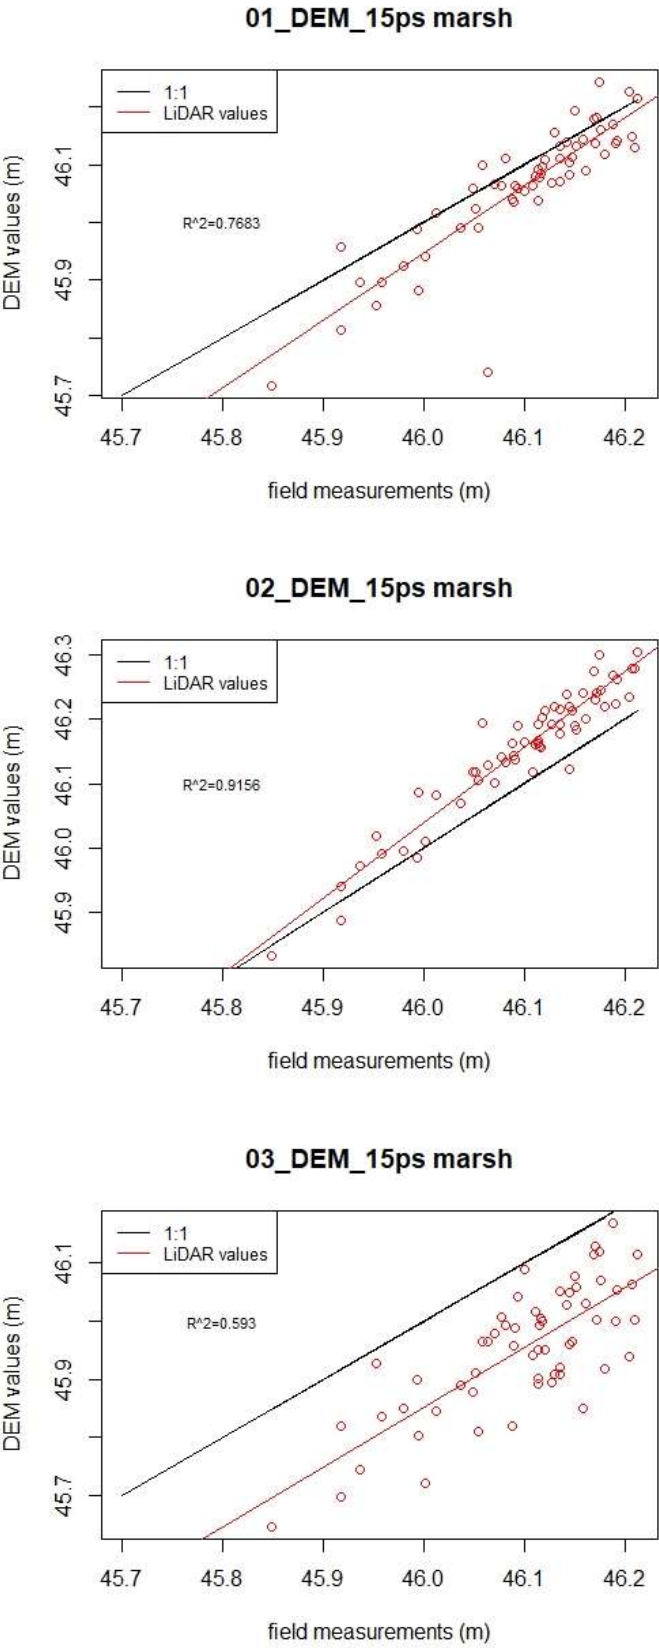

Figure S21. (Continue)

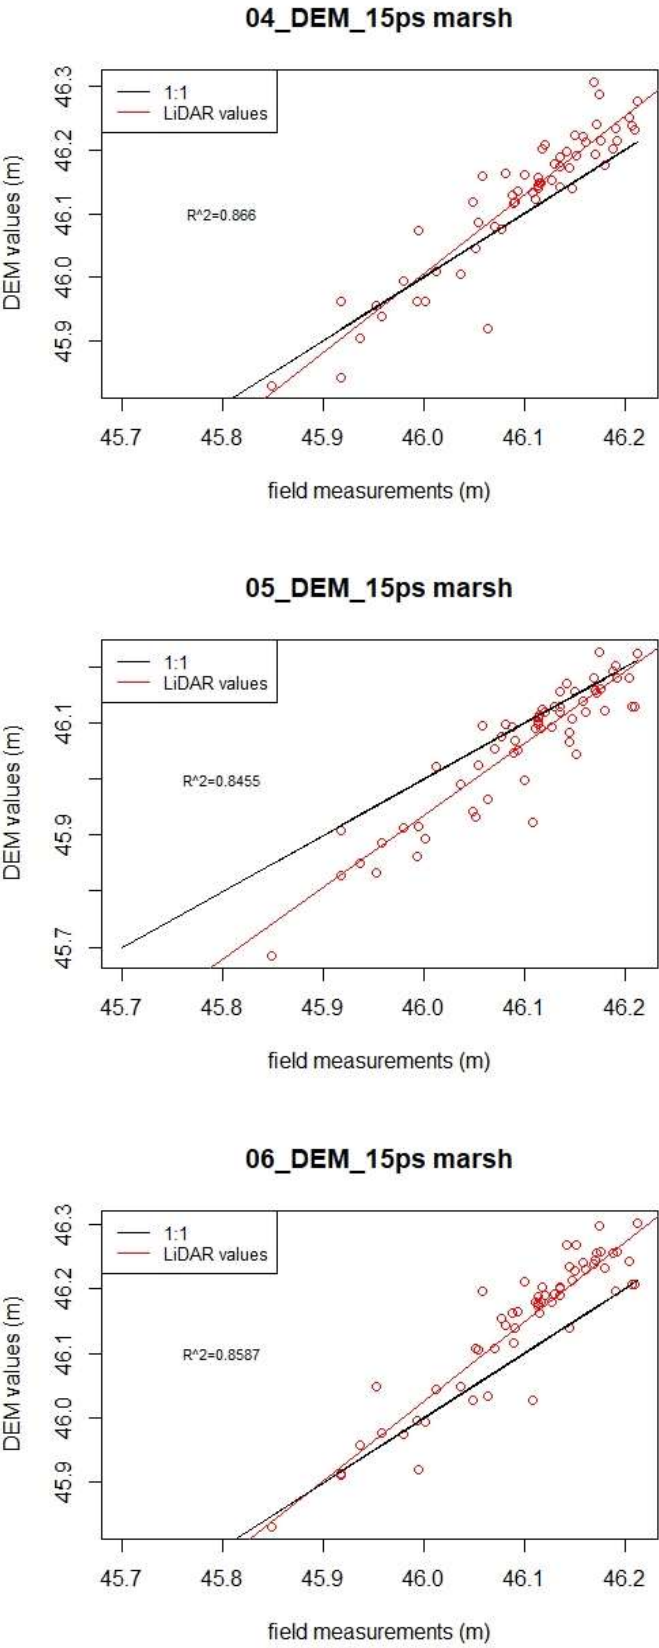

Figure S21. (Continue)

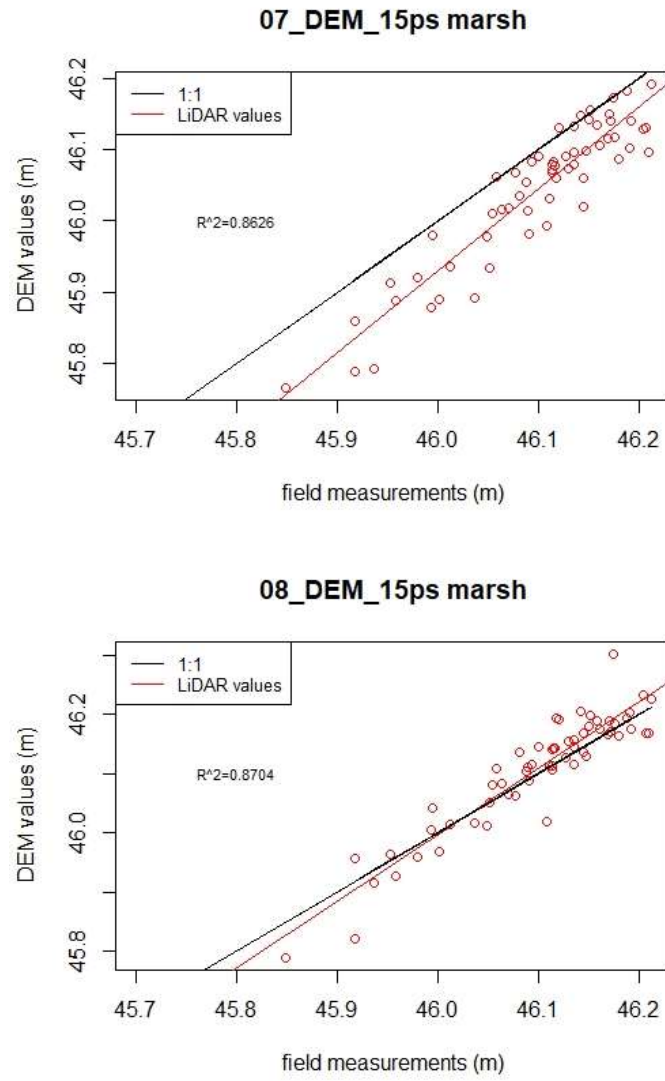

Figure S21. Linear regression and  $R^2$  values for 15-point-spacing-DEMs values from the eight missions compared to GCPs using only points situated on the marsh surface. The red line is the regression line for the compared datasets, the black line represents the 1:1 pattern.

Table S60. Difference in elevation at each point between 15-point-spacing-DEMs value and GCP value for DEMs derived from the eight missions.

| Point Id | 01_DEM_<br>15ps | 02_DEM_<br>15ps | 03_DEM_<br>15ps | 04_DEM_<br>15ps | 05_DEM_<br>15ps | 06_DEM_<br>15ps | 07_DEM_<br>15ps | 08_DEM_<br>15ps |
|----------|-----------------|-----------------|-----------------|-----------------|-----------------|-----------------|-----------------|-----------------|
| B3       | 0.010           | 0.104           | -0.055          | 0.137           | 0.011           | 0.068           | -0.055          | -0.004          |
| C1       | -0.082          | 0.067           | -0.209          | 0.022           | -0.082          | -0.003          | -0.114          | -0.042          |
| C2       | -0.060          | 0.070           | -0.145          | 0.030           | -0.079          | 0.000           | -0.077          | -0.039          |
| C3       | -0.045          | 0.010           | -0.167          | 0.024           | -0.185          | -0.081          | -0.116          | -0.091          |
| C4       | 0.010           | 0.070           | -0.170          | 0.069           | -0.106          | -0.021          | -0.072          | -0.037          |
| R1       | -0.305          | -0.020          | -0.174          | -0.049          | -0.222          | 0.008           | -0.215          | -0.005          |
| R10      | -0.024          | 0.077           | -0.164          | 0.042           | -0.013          | 0.073           | -0.043          | 0.025           |
| R11      | -0.323          | 0.064           | -0.099          | -0.146          | -0.099          | -0.031          | -0.048          | 0.019           |
| R12      | -0.059          | 0.065           | -0.234          | 0.025           | -0.035          | 0.051           | -0.038          | -0.001          |
| R13      | 0.041           | 0.136           | -0.095          | 0.099           | 0.037           | 0.137           | 0.003           | 0.049           |
| R14      | 0.011           | 0.069           | -0.170          | 0.068           | -0.017          | 0.083           | -0.032          | -0.002          |
| R15      | 0.068           | 0.126           | -0.056          | 0.113           | 0.052           | 0.123           | -0.002          | 0.127           |
| R16      | 0.022           | 0.030           | -0.266          | 0.047           | -0.023          | 0.039           | -0.075          | 0.027           |
| R17      | -0.054          | 0.033           | -0.192          | 0.043           | 0.011           | 0.005           | -0.089          | 0.013           |
| R18      | 0.001           | 0.091           | -0.097          | 0.064           | 0.011           | 0.089           | -0.021          | 0.014           |
| R19      | -0.023          | 0.080           | -0.084          | 0.055           | -0.006          | 0.068           | -0.039          | -0.019          |
| R2       | -0.062          | 0.040           | -0.262          | -0.004          | -0.057          | 0.053           | -0.093          | -0.016          |
| R20      | -0.020          | 0.032           | -0.094          | 0.039           | -0.108          | 0.117           | 0.003           | 0.046           |
| R21      | -0.071          | 0.040           | -0.131          | 0.051           | -0.042          | 0.070           | -0.054          | 0.014           |
| R22      | -0.012          | 0.092           | -0.170          | 0.087           | -0.001          | 0.070           | 0.010           | 0.070           |
| R23      | -0.035          | 0.095           | -0.051          | 0.043           | -0.040          | 0.072           | -0.010          | 0.022           |
| R24      | -0.029          | 0.067           | -0.142          | -0.007          | -0.119          | 0.056           | -0.118          | -0.001          |
| R25      | -0.014          | 0.082           | -0.309          | 0.062           | -0.019          | 0.081           | -0.024          | 0.031           |
| R26      | -0.041          | 0.074           | -0.095          | 0.028           | -0.079          | -0.005          | -0.085          | 0.024           |
| R27      | 0.026           | 0.088           | -0.222          | 0.048           | 0.000           | 0.062           | -0.058          | 0.023           |
| R28      | -0.062          | -0.022          | -0.184          | 0.026           | -0.062          | 0.090           | -0.125          | -0.008          |
| R29      | -0.015          | 0.069           | -0.105          | 0.038           | -0.014          | 0.081           | -0.059          | 0.008           |
| R3       | -0.022          | 0.083           | -0.119          | 0.084           | 0.006           | 0.084           | -0.058          | 0.076           |
| R30      | -0.002          | 0.096           | -0.113          | 0.055           | 0.029           | 0.127           | 0.006           | 0.064           |
| R31      | -0.018          | 0.080           | -0.020          | 0.014           | 0.004           | 0.067           | -0.007          | 0.004           |
| R32      | -0.051          | 0.068           | -0.140          | 0.021           | -0.012          | 0.064           | -0.053          | -0.018          |
| R33      | -0.034          | 0.065           | -0.184          | -0.009          | -0.041          | 0.065           | -0.050          | -0.018          |
| R34      | -0.034          | 0.060           | -0.041          | 0.023           | -0.012          | 0.074           | -0.021          | 0.019           |
| R35      | -0.114          | 0.091           | -0.192          | 0.078           | -0.079          | -0.076          | -0.015          | 0.047           |
| R36      | -0.046          | 0.065           | -0.010          | 0.062           | -0.101          | 0.111           | -0.010          | 0.045           |
| R37      | -0.007          | -0.009          | -0.094          | -0.032          | -0.133          | 0.001           | -0.115          | 0.011           |
| R38      | -0.097          | 0.067           | -0.024          | 0.003           | -0.119          | 0.096           | -0.041          | 0.011           |
| R39      | -0.036          | 0.044           | -0.122          | 0.034           | 0.001           | 0.047           | -0.031          | 0.029           |
| R4       | -0.066          | 0.042           | -0.227          | 0.038           | -0.016          | 0.054           | -0.057          | 0.021           |
| R40      | -0.030          | 0.049           | -0.095          | 0.011           | -0.021          | 0.068           | -0.080          | 0.003           |

|                         |              |              |              |              |              |              |              |              |
|-------------------------|--------------|--------------|--------------|--------------|--------------|--------------|--------------|--------------|
| R41                     | -0.031       | 0.041        | -0.112       | 0.032        | -0.025       | 0.064        | -0.039       | 0.027        |
| R42                     | 0.044        | 0.039        | -0.073       | 0.072        | 0.005        | 0.079        | -0.009       | 0.030        |
| R43                     | -0.003       | 0.056        | -0.215       | 0.005        | 0.021        | 0.064        | -0.004       | 0.010        |
| R44                     | -0.014       | 0.064        | -0.070       | -0.003       | -0.002       | 0.077        | -0.011       | -0.015       |
| R45                     | 0.028        | 0.050        | -0.090       | 0.082        | 0.017        | 0.062        | -0.046       | 0.055        |
| R46                     | -0.027       | 0.047        | -0.103       | 0.028        | -0.021       | 0.049        | -0.109       | -0.002       |
| R47                     | 0.003        | 0.068        | -0.169       | -0.004       | 0.009        | 0.032        | -0.078       | 0.000        |
| R48                     | -0.040       | 0.034        | -0.194       | -0.034       | -0.086       | 0.022        | -0.145       | -0.021       |
| R49                     | -0.105       | -0.030       | -0.220       | -0.075       | -0.090       | -0.006       | -0.129       | -0.097       |
| R5                      | -0.077       | 0.052        | -0.212       | 0.031        | -0.016       | 0.064        | -0.034       | -0.007       |
| R50                     | -0.046       | 0.033        | -0.147       | -0.032       | -0.045       | 0.011        | -0.145       | -0.021       |
| R51                     | -0.061       | 0.009        | -0.281       | -0.039       | -0.107       | -0.007       | -0.112       | -0.032       |
| R52                     | -0.062       | 0.034        | -0.123       | -0.020       | -0.071       | 0.018        | -0.071       | -0.032       |
| R53                     | -0.006       | 0.031        | -0.092       | 0.008        | -0.016       | 0.037        | -0.052       | -0.005       |
| R54                     | 0.039        | 0.022        | -0.099       | 0.043        | -0.009       | -0.004       | -0.059       | 0.038        |
| R55                     | -0.055       | 0.016        | -0.131       | 0.014        | -0.067       | -0.005       | -0.060       | -0.021       |
| R56                     | -0.131       | -0.015       | -0.202       | -0.019       | -0.163       | -0.016       | -0.082       | -0.059       |
| R6                      | -0.077       | 0.048        | -0.221       | 0.026        | -0.003       | 0.060        | -0.047       | 0.000        |
| R7                      | -0.047       | 0.073        | -0.269       | 0.042        | 0.006        | 0.073        | -0.033       | 0.016        |
| R8                      | -0.055       | 0.054        | -0.132       | 0.027        | -0.043       | 0.026        | -0.076       | 0.021        |
| R9                      | -0.064       | 0.052        | -0.244       | 0.033        | -0.030       | 0.052        | -0.043       | 0.027        |
| <b>average<br/>RMSE</b> | <b>0.076</b> | <b>0.064</b> | <b>0.162</b> | <b>0.053</b> | <b>0.069</b> | <b>0.065</b> | <b>0.073</b> | <b>0.037</b> |

Table S61. Resume of accuracy assessment for DEMs derived from the eight missions.

|                                     |      | 01_DEM | 02_DEM | 03_DEM | 04_DEM | 05_DEM | 06_DEM | 07_DEM | 08_DEM |
|-------------------------------------|------|--------|--------|--------|--------|--------|--------|--------|--------|
| average RMSE                        | 5ps  | 0.069  | 0.099  | 0.059  | 0.066  | 0.064  | 0.100  | 0.048  | 0.048  |
|                                     | 10ps | 0.056  | 0.096  | 0.058  | 0.064  | 0.067  | 0.091  | 0.045  | 0.045  |
|                                     | 15ps | 0.076  | 0.064  | 0.162  | 0.053  | 0.069  | 0.065  | 0.073  | 0.037  |
| R <sup>2</sup> value (all points)   | 5ps  | 0.9044 | 0.8733 | 0.9174 | 0.9543 | 0.9244 | 0.8627 | 0.9537 | 0.9691 |
|                                     | 10ps | 0.9296 | 0.9042 | 0.9219 | 0.9674 | 0.9155 | 0.9031 | 0.9613 | 0.9707 |
|                                     | 15ps | 0.888  | 0.9694 | 0.8803 | 0.9463 | 0.9162 | 0.9489 | 0.9463 | 0.9654 |
| R <sup>2</sup> value (marsh points) | 5ps  | 0.7026 | 0.5929 | 0.7363 | 0.8642 | 0.8127 | 0.6113 | 0.7911 | 0.8728 |
|                                     | 10ps | 0.774  | 0.6815 | 0.7514 | 0.9148 | 0.8088 | 0.7232 | 0.8533 | 0.8778 |
|                                     | 15ps | 0.7683 | 0.9156 | 0.593  | 0.866  | 0.8455 | 0.8587 | 0.8626 | 0.8704 |

Table S62. Output resolution for each DOD. Each DOD is identified by its sub-index, which corresponds to the DSM and DEM used for its generation: DOD<sub>1-5</sub> is obtained from the subtraction of DEM-5ps (5-point-spacing resolution) from DSM-1ps (1-point-spacing resolution).

| mission_nº | DOD <sub>1-5</sub> | DOD <sub>1-10</sub> | DOD <sub>1-15</sub> | DOD <sub>3-5</sub> | DOD <sub>3-10</sub> | DOD <sub>3-15</sub> | DOD <sub>5-5</sub> | DOD <sub>5-10</sub> | DOD <sub>5-15</sub> |
|------------|--------------------|---------------------|---------------------|--------------------|---------------------|---------------------|--------------------|---------------------|---------------------|
| 1          | 0.02               | 0.02                | 0.02                | 0.06               | 0.06                | 0.06                | 0.09               | 0.09                | 0.09                |
| 2          | 0.02               | 0.02                | 0.02                | 0.06               | 0.06                | 0.06                | 0.09               | 0.09                | 0.09                |
| 3          | 0.02               | 0.02                | 0.02                | 0.06               | 0.06                | 0.06                | 0.09               | 0.09                | 0.09                |
| 4          | 0.02               | 0.02                | 0.02                | 0.06               | 0.06                | 0.06                | 0.09               | 0.09                | 0.09                |
| 5          | 0.02               | 0.02                | 0.02                | 0.06               | 0.06                | 0.06                | 0.09               | 0.09                | 0.09                |
| 6          | 0.02               | 0.02                | 0.02                | 0.06               | 0.06                | 0.06                | 0.09               | 0.09                | 0.09                |
| 7          | 0.02               | 0.02                | 0.02                | 0.06               | 0.06                | 0.06                | 0.09               | 0.09                | 0.09                |
| 8          | 0.02               | 0.02                | 0.02                | 0.06               | 0.06                | 0.06                | 0.09               | 0.09                | 0.09                |

Table S63. Field values of vegetation height measured at GCPs ('field' column) and values extracted from DOD<sub>1-5</sub> for the eight missions. For each point corresponding specie ('spp' column) is also reported. Each column identifies the mission: m01<sub>1-5</sub> represents data extracted from DOD<sub>1-5</sub> of mission 1, and so on. Values expressed in meters.

| Point Id | species                | field | m01 <sub>1-5</sub> | m02 <sub>1-5</sub> | m03 <sub>1-5</sub> | m04 <sub>1-5</sub> | m05 <sub>1-5</sub> | m06 <sub>1-5</sub> | m07 <sub>1-5</sub> | m08 <sub>1-5</sub> |
|----------|------------------------|-------|--------------------|--------------------|--------------------|--------------------|--------------------|--------------------|--------------------|--------------------|
| C1       | Salicornia             | 0.07  | 0.11               | 0.00               | 0.03               | 0.03               | -                  | -                  | -                  | -                  |
| C2       | Salicornia             | 0.07  | 0.12               | 0.02               | 0.05               | 0.08               | -                  | -                  | -                  | -                  |
| C3       | Salicornia             | 0.13  | 0.11               | 0.07               | 0.07               | 0.08               | -                  | -                  | -                  | -                  |
| C4       | Salicornia             | 0.13  | 0.09               | 0.06               | 0.02               | 0.03               | -                  | -                  | -                  | -                  |
| R2       | Salicornia             | 0.18  | 0.07               | 0.01               | 0.10               | 0.05               | 0.09               | 0.01               | 0.02               | 0.03               |
| R3       | Salicornia             | 0.20  | 0.13               | 0.05               | 0.15               | 0.04               | 0.13               | 0.05               | 0.07               | 0.05               |
| R4       | Salicornia             | 0.13  | 0.09               | 0.01               | 0.02               | 0.00               | 0.05               | 0.00               | 0.03               | 0.03               |
| R5       | Salicornia             | 0.12  | 0.10               | 0.01               | 0.19               | 0.03               | 0.11               | 0.00               | 0.06               | 0.06               |
| R6       | Salicornia             | 0.20  | 0.15               | 0.02               | 0.10               | 0.03               | 0.08               | 0.02               | 0.05               | 0.08               |
| R7       | Salicornia             | 0.19  | 0.10               | 0.01               | 0.08               | 0.04               | 0.10               | 0.02               | 0.03               | 0.05               |
| R8       | Salicornia             | 0.20  | 0.12               | 0.01               | 0.08               | 0.04               | 0.12               | 0.02               | 0.04               | 0.07               |
| R9       | Salicornia             | 0.19  | 0.10               | 0.01               | 0.12               | 0.03               | 0.09               | 0.03               | 0.08               | 0.04               |
| R10      | Salicornia             | 0.23  | 0.10               | 0.02               | 0.04               | 0.04               | 0.07               | 0.01               | 0.05               | 0.06               |
| R11      | Salicornia             | 0.28  | 0.32               | 0.23               | 0.21               | 0.20               | 0.34               | 0.29               | 0.13               | 0.08               |
| R12      | Salicornia             | 0.30  | 0.14               | 0.03               | 0.10               | 0.08               | 0.14               | 0.04               | 0.01               | 0.07               |
| R13      | Sarcocornia            | 0.23  | 0.10               | 0.02               | 0.01               | 0.05               | 0.08               | 0.01               | 0.06               | 0.06               |
| R14      | Sarcocornia            | 0.24  | 0.12               | 0.06               | 0.12               | 0.07               | 0.14               | 0.07               | 0.09               | 0.10               |
| R15      | Sarcocornia+Sporobolus | 0.35  | 0.11               | 0.06               | 0.22               | 0.10               | 0.07               | 0.05               | 0.15               | 0.12               |
| R16      | Sarcocornia            | 0.25  | 0.15               | 0.09               | 0.07               | 0.07               | 0.16               | 0.02               | 0.09               | 0.09               |
| R17      | Sarcocornia            | 0.26  | 0.27               | 0.32               | 0.18               | 0.05               | 0.23               | 0.24               | 0.14               | 0.05               |
| R18      | Sarcocornia            | 0.27  | 0.10               | 0.03               | 0.10               | 0.03               | 0.10               | 0.02               | 0.06               | 0.08               |
| R19      | Sarcocornia            | 0.27  | 0.12               | 0.02               | 0.04               | 0.04               | 0.08               | 0.04               | 0.09               | 0.11               |
| R20      | Sarcocornia            | 0.29  | 0.23               | 0.14               | 0.14               | 0.08               | 0.19               | 0.08               | 0.09               | 0.09               |
| R21      | Sarcocornia            | 0.23  | 0.10               | 0.00               | 0.01               | 0.04               | 0.11               | 0.01               | 0.07               | 0.07               |
| R22      | Sarcocornia            | 0.28  | 0.14               | 0.07               | 0.11               | 0.09               | 0.04               | 0.04               | 0.13               | 0.08               |
| R23      | Sarcocornia            | 0.22  | 0.12               | 0.01               | 0.07               | 0.07               | 0.10               | 0.02               | 0.09               | 0.09               |
| R24      | Sarcocornia            | 0.27  | 0.20               | 0.10               | 0.18               | 0.07               | 0.23               | 0.14               | 0.18               | 0.10               |
| R25      | Sarcocornia            | 0.21  | 0.13               | 0.04               | 0.08               | 0.08               | 0.13               | 0.05               | 0.11               | 0.09               |
| R26      | Sarcocornia            | 0.20  | 0.38               | 0.43               | 0.13               | 0.06               | 0.29               | 0.38               | 0.16               | 0.13               |
| R27      | Sarcocornia            | 0.20  | 0.09               | 0.04               | 0.10               | 0.06               | 0.11               | 0.05               | 0.13               | 0.10               |
| R28      | Sarcocornia            | 0.23  | 0.23               | 0.18               | 0.28               | 0.10               | 0.20               | 0.25               | 0.21               | 0.05               |
| R29      | Sarcocornia            | 0.23  | 0.11               | 0.01               | 0.12               | 0.05               | 0.08               | 0.04               | 0.06               | 0.04               |
| R30      | Sarcocornia            | 0.26  | 0.13               | 0.05               | 0.08               | 0.02               | 0.14               | 0.03               | 0.09               | 0.08               |
| R31      | Sarcocornia            | 0.26  | 0.14               | 0.06               | 0.10               | 0.07               | 0.10               | 0.05               | 0.12               | 0.13               |
| R32      | Sarcocornia            | 0.21  | 0.04               | 0.03               | 0.00               | 0.02               | 0.07               | 0.03               | 0.02               | 0.09               |
| R33      | Sarcocornia            | 0.21  | 0.12               | 0.01               | 0.07               | 0.08               | 0.10               | 0.01               | 0.07               | 0.10               |
| R34      | Sarcocornia            | 0.28  | 0.11               | 0.03               | 0.11               | 0.10               | 0.13               | 0.03               | 0.09               | 0.11               |
| R35      | Sarcocornia            | 0.27  | 0.15               | 0.02               | 0.08               | 0.11               | 0.18               | 0.08               | 0.09               | 0.13               |
| R36      | Sarcocornia            | 0.28  | 0.20               | 0.06               | 0.08               | 0.10               | 0.16               | 0.04               | 0.09               | 0.11               |
| R37      | Sarcocornia            | 0.20  | 0.08               | 0.03               | 0.08               | 0.09               | 0.11               | 0.06               | 0.11               | 0.06               |
| R38      | Sarcocornia            | 0.24  | 0.17               | 0.10               | 0.13               | 0.09               | 0.42               | 0.10               | 0.14               | 0.12               |
| R39      | Sarcocornia            | 0.29  | 0.14               | 0.05               | 0.11               | 0.07               | 0.12               | 0.04               | 0.12               | 0.09               |
| R40      | Sarcocornia            | 0.22  | 0.10               | 0.06               | 0.10               | 0.10               | 0.10               | 0.07               | 0.09               | 0.10               |
| R41      | Sarcocornia            | 0.21  | 0.08               | 0.04               | 0.04               | 0.04               | 0.13               | 0.02               | 0.05               | 0.05               |
| R42      | Sarcocornia            | 0.20  | 0.13               | 0.07               | 0.12               | 0.07               | 0.10               | 0.08               | 0.07               | 0.10               |
| R43      | Sarcocornia+Sporobolus | 0.34  | 0.08               | 0.02               | 0.04               | 0.03               | 0.09               | 0.01               | 0.04               | 0.05               |
| R44      | Sarcocornia            | 0.19  | 0.08               | 0.05               | 0.02               | 0.11               | 0.09               | 0.06               | 0.05               | 0.14               |
| R45      | Sarcocornia            | 0.29  | 0.12               | 0.06               | 0.11               | 0.04               | 0.08               | 0.05               | 0.07               | 0.01               |
| R46      | Salicornia             | 0.17  | 0.09               | 0.01               | 0.11               | 0.02               | 0.07               | 0.01               | 0.12               | 0.08               |
| R47      | Salicornia             | 0.18  | 0.08               | 0.03               | 0.12               | 0.07               | 0.05               | 0.04               | 0.09               | 0.07               |
| R48      | Salicornia             | 0.17  | 0.14               | 0.01               | 0.00               | 0.06               | 0.11               | 0.02               | 0.08               | 0.05               |
| R49      | Salicornia             | 0.14  | 0.09               | 0.02               | 0.03               | 0.08               | 0.11               | 0.03               | 0.02               | 0.08               |
| R50      | Salicornia             | 0.14  | 0.10               | 0.04               | 0.12               | 0.06               | 0.08               | 0.04               | 0.09               | 0.10               |
| R51      | Salicornia             | 0.15  | 0.54               | 0.07               | 0.13               | 0.04               | 0.16               | 0.09               | 0.09               | 0.08               |
| R52      | Salicornia             | 0.13  | 0.19               | 0.03               | 0.07               | 0.09               | 0.16               | 0.05               | 0.06               | 0.10               |

|     |             |      |      |      |      |      |      |      |      |      |
|-----|-------------|------|------|------|------|------|------|------|------|------|
| R53 | Sarcocornia | 0.25 | 0.11 | 0.05 | 0.21 | 0.08 | 0.12 | 0.08 | 0.10 | 0.14 |
| R54 | Sarcocornia | 0.20 | 0.14 | 0.19 | 0.06 | 0.08 | 0.25 | 0.29 | 0.07 | 0.08 |
| R55 | Sarcocornia | 0.29 | 0.20 | 0.10 | 0.17 | 0.07 | 0.15 | 0.08 | 0.08 | 0.13 |
| R56 | Sarcocornia | 0.13 | 0.25 | 0.05 | 0.22 | 0.09 | 0.17 | 0.02 | 0.13 | 0.09 |

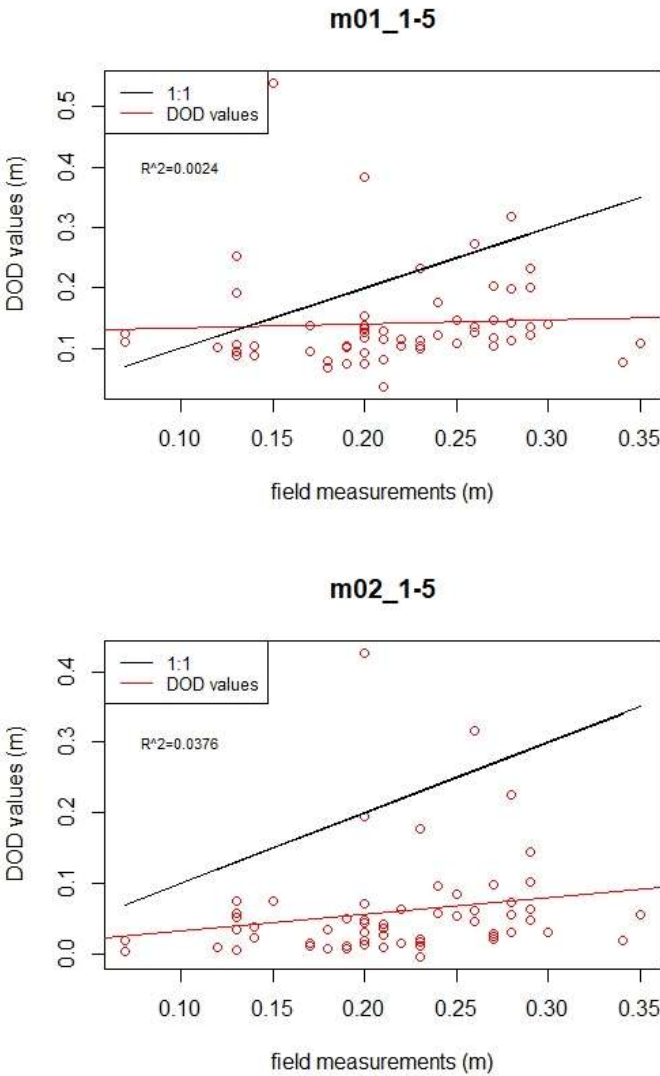

Figure S22. (Continue)

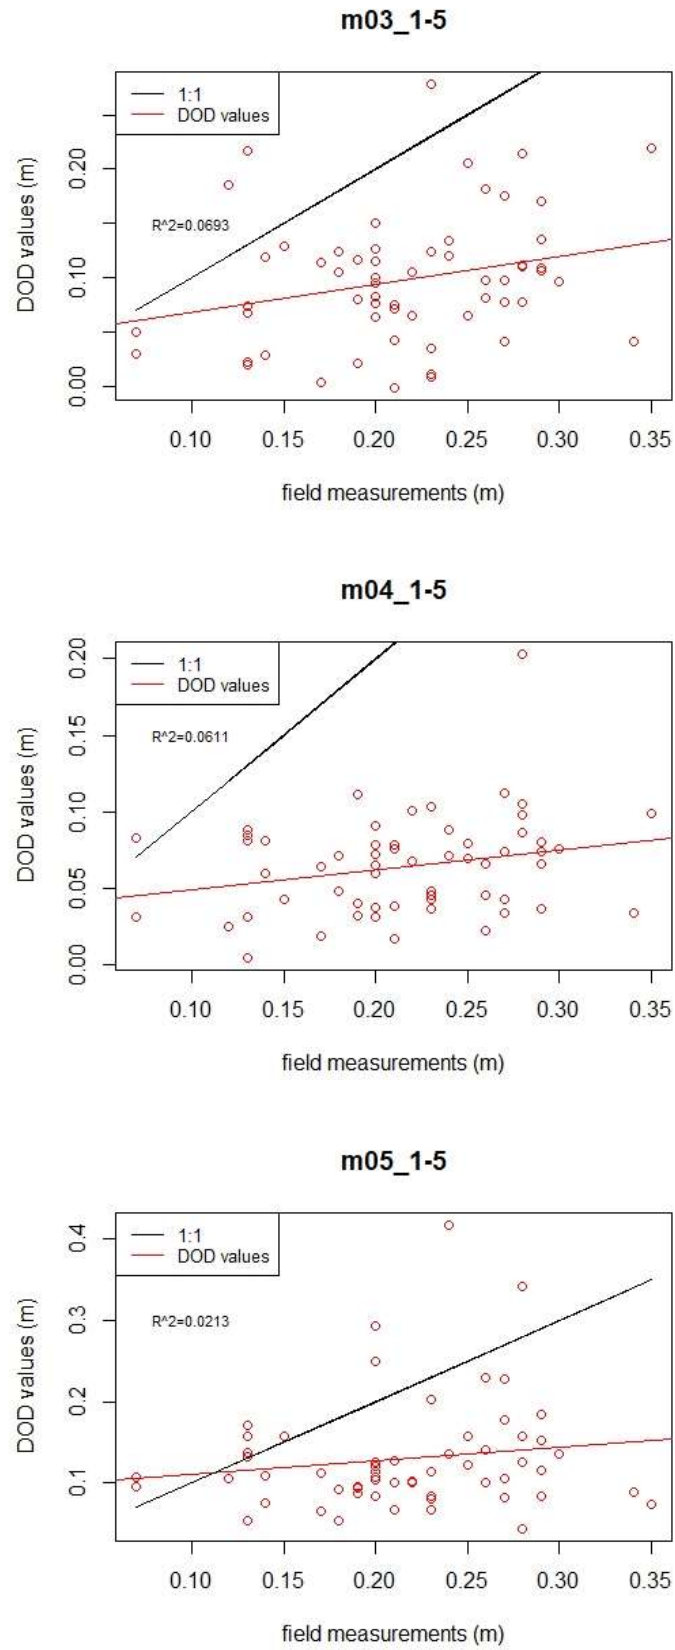

Figure S22. (Continue)

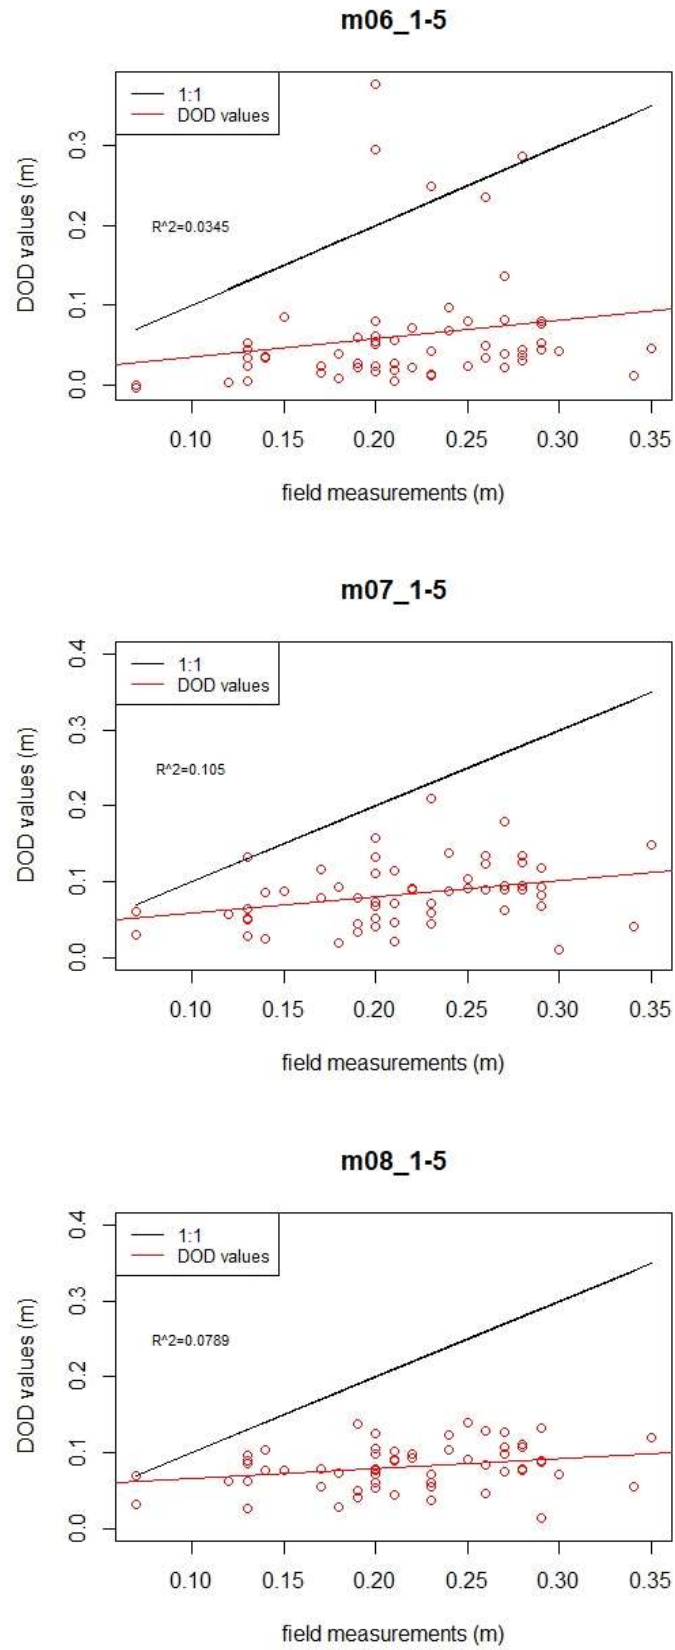

Figure S22. Linear regression and  $R^2$  value for  $DOD_{1-5}$  for all the eight missions compared to vegetation height values of GCPs. The red line is the regression line for the compared datasets, the black line represents the 1:1 pattern.

Table S64. Values of difference from field measurements for  $DOD_{1-5}$  for the eight missions at each point. Each column identifies the mission:  $m01_{1-5}$  represents data extracted from  $DOD_{1-5}$  of mission 1, and so on. Values expressed in meters. Negative values underestimate canopy height, positive values overestimate canopy height. The average RMSE defining the output for each mission is shown at the bottom of the respective column.

| Point Id | $m01_{1-5}$ | $m02_{1-5}$ | $m03_{1-5}$ | $m04_{1-5}$ | $m05_{1-5}$ | $m06_{1-5}$ | $m07_{1-5}$ | $m08_{1-5}$ |
|----------|-------------|-------------|-------------|-------------|-------------|-------------|-------------|-------------|
| C1       | 0.04        | -0.07       | -0.04       | -0.04       | -           | -           | -           | -           |
| C2       | 0.05        | -0.05       | -0.02       | 0.01        | -           | -           | -           | -           |
| C3       | -0.02       | -0.06       | -0.06       | -0.05       | -           | -           | -           | -           |
| C4       | -0.04       | -0.07       | -0.11       | -0.10       | -           | -           | -           | -           |
| R2       | -0.11       | -0.17       | -0.08       | -0.13       | -0.09       | -0.17       | -0.16       | -0.15       |
| R3       | -0.07       | -0.15       | -0.05       | -0.16       | -0.08       | -0.15       | -0.13       | -0.15       |
| R4       | -0.04       | -0.12       | -0.11       | -0.13       | -0.08       | -0.13       | -0.10       | -0.10       |
| R5       | -0.02       | -0.11       | 0.07        | -0.09       | -0.01       | -0.12       | -0.06       | -0.06       |
| R6       | -0.05       | -0.18       | -0.10       | -0.17       | -0.12       | -0.18       | -0.15       | -0.12       |
| R7       | -0.09       | -0.18       | -0.11       | -0.15       | -0.09       | -0.17       | -0.16       | -0.14       |
| R8       | -0.08       | -0.19       | -0.12       | -0.16       | -0.08       | -0.18       | -0.16       | -0.13       |
| R9       | -0.09       | -0.18       | -0.07       | -0.16       | -0.10       | -0.16       | -0.11       | -0.15       |
| R10      | -0.13       | -0.21       | -0.19       | -0.19       | -0.16       | -0.22       | -0.18       | -0.17       |
| R11      | 0.04        | -0.05       | -0.07       | -0.08       | 0.06        | 0.01        | -0.15       | -0.20       |
| R12      | -0.16       | -0.27       | -0.20       | -0.22       | -0.16       | -0.26       | -0.29       | -0.23       |
| R13      | -0.13       | -0.21       | -0.22       | -0.18       | -0.15       | -0.22       | -0.17       | -0.17       |
| R14      | -0.12       | -0.18       | -0.12       | -0.17       | -0.10       | -0.17       | -0.15       | -0.14       |
| R15      | -0.24       | -0.29       | -0.13       | -0.25       | -0.28       | -0.30       | -0.20       | -0.23       |
| R16      | -0.10       | -0.16       | -0.18       | -0.18       | -0.09       | -0.23       | -0.16       | -0.16       |
| R17      | 0.01        | 0.06        | -0.08       | -0.21       | -0.03       | -0.02       | -0.12       | -0.21       |
| R18      | -0.17       | -0.24       | -0.17       | -0.24       | -0.17       | -0.25       | -0.21       | -0.19       |
| R19      | -0.15       | -0.25       | -0.23       | -0.23       | -0.19       | -0.23       | -0.18       | -0.16       |
| R20      | -0.06       | -0.15       | -0.15       | -0.21       | -0.10       | -0.21       | -0.20       | -0.20       |
| R21      | -0.13       | -0.23       | -0.22       | -0.19       | -0.12       | -0.22       | -0.16       | -0.16       |
| R22      | -0.14       | -0.21       | -0.17       | -0.19       | -0.24       | -0.24       | -0.15       | -0.20       |
| R23      | -0.10       | -0.21       | -0.15       | -0.15       | -0.12       | -0.20       | -0.13       | -0.13       |
| R24      | -0.07       | -0.17       | -0.09       | -0.20       | -0.04       | -0.13       | -0.09       | -0.17       |
| R25      | -0.08       | -0.17       | -0.13       | -0.13       | -0.08       | -0.16       | -0.10       | -0.12       |
| R26      | 0.18        | 0.23        | -0.07       | -0.14       | 0.09        | 0.18        | -0.04       | -0.08       |
| R27      | -0.11       | -0.16       | -0.10       | -0.14       | -0.09       | -0.15       | -0.07       | -0.10       |
| R28      | 0.00        | -0.05       | 0.05        | -0.13       | -0.03       | 0.02        | -0.02       | -0.18       |
| R29      | -0.12       | -0.22       | -0.11       | -0.18       | -0.15       | -0.19       | -0.17       | -0.19       |
| R30      | -0.13       | -0.21       | -0.18       | -0.24       | -0.12       | -0.23       | -0.17       | -0.18       |
| R31      | -0.12       | -0.20       | -0.16       | -0.19       | -0.16       | -0.21       | -0.14       | -0.13       |
| R32      | -0.17       | -0.18       | -0.21       | -0.19       | -0.14       | -0.18       | -0.19       | -0.12       |
| R33      | -0.09       | -0.20       | -0.14       | -0.13       | -0.11       | -0.20       | -0.14       | -0.11       |
| R34      | -0.17       | -0.25       | -0.17       | -0.18       | -0.15       | -0.25       | -0.19       | -0.17       |
| R35      | -0.12       | -0.25       | -0.19       | -0.16       | -0.09       | -0.19       | -0.18       | -0.14       |
| R36      | -0.08       | -0.22       | -0.20       | -0.18       | -0.12       | -0.24       | -0.19       | -0.17       |
| R37      | -0.12       | -0.17       | -0.12       | -0.11       | -0.09       | -0.14       | -0.09       | -0.14       |
| R38      | -0.07       | -0.14       | -0.11       | -0.15       | 0.18        | -0.14       | -0.10       | -0.12       |
| R39      | -0.15       | -0.24       | -0.18       | -0.22       | -0.17       | -0.25       | -0.17       | -0.20       |
| R40      | -0.12       | -0.16       | -0.12       | -0.12       | -0.12       | -0.15       | -0.13       | -0.12       |
| R41      | -0.13       | -0.17       | -0.17       | -0.17       | -0.08       | -0.19       | -0.16       | -0.16       |
| R42      | -0.07       | -0.13       | -0.08       | -0.13       | -0.10       | -0.12       | -0.13       | -0.10       |
| R43      | -0.26       | -0.32       | -0.30       | -0.31       | -0.25       | -0.33       | -0.30       | -0.29       |
| R44      | -0.11       | -0.14       | -0.17       | -0.08       | -0.10       | -0.13       | -0.14       | -0.05       |
| R45      | -0.17       | -0.23       | -0.18       | -0.25       | -0.21       | -0.24       | -0.22       | -0.28       |
| R46      | -0.08       | -0.16       | -0.06       | -0.15       | -0.10       | -0.16       | -0.05       | -0.09       |
| R47      | -0.10       | -0.15       | -0.06       | -0.11       | -0.13       | -0.14       | -0.09       | -0.11       |

|          |              |              |              |              |              |              |              |              |
|----------|--------------|--------------|--------------|--------------|--------------|--------------|--------------|--------------|
| R48      | -0.03        | -0.16        | -0.17        | -0.11        | -0.06        | -0.15        | -0.09        | -0.12        |
| R49      | -0.05        | -0.12        | -0.11        | -0.06        | -0.03        | -0.11        | -0.12        | -0.06        |
| R50      | -0.04        | -0.10        | -0.02        | -0.08        | -0.06        | -0.10        | -0.05        | -0.04        |
| R51      | 0.39         | -0.08        | -0.02        | -0.11        | 0.01         | -0.06        | -0.06        | -0.07        |
| R52      | 0.06         | -0.10        | -0.06        | -0.04        | 0.03         | -0.08        | -0.07        | -0.03        |
| R53      | -0.14        | -0.20        | -0.04        | -0.17        | -0.13        | -0.17        | -0.15        | -0.11        |
| R54      | -0.06        | -0.01        | -0.14        | -0.12        | 0.05         | 0.09         | -0.13        | -0.12        |
| R55      | -0.09        | -0.19        | -0.12        | -0.22        | -0.14        | -0.21        | -0.21        | -0.16        |
| R56      | 0.12         | -0.08        | 0.09         | -0.04        | 0.04         | -0.11        | 0.00         | -0.04        |
| PROMEDIO | -0.08        | -0.16        | -0.12        | -0.16        | -0.09        | -0.16        | -0.14        | -0.14        |
| MEDIANA  | -0.10        | -0.17        | -0.12        | -0.16        | -0.10        | -0.17        | -0.15        | -0.14        |
| RMSE     | <b>0.123</b> | <b>0.179</b> | <b>0.138</b> | <b>0.164</b> | <b>0.124</b> | <b>0.183</b> | <b>0.151</b> | <b>0.152</b> |

Table S65. Field values of vegetation height measured at GCPs ('field' column) and values extracted from DOD<sub>1-10</sub> for the eight missions. For each point corresponding specie ('spp' column) is also reported. Each column identifies the mission: m01<sub>1-10</sub> represents data extracted from DOD<sub>1-10</sub> of mission 1, and so on. Values expressed in meters.

| Point Id | spp                    | field | m01 <sub>1-10</sub> | m02 <sub>1-10</sub> | m03 <sub>1-10</sub> | m04 <sub>1-10</sub> | m05 <sub>1-10</sub> | m06 <sub>1-10</sub> | m07 <sub>1-10</sub> | m08 <sub>1-10</sub> |
|----------|------------------------|-------|---------------------|---------------------|---------------------|---------------------|---------------------|---------------------|---------------------|---------------------|
| C1       | Salicornia             | 0.07  | 0.12                | 0.01                | 0.04                | 0.03                | -                   | -                   | -                   | -                   |
| C2       | Salicornia             | 0.07  | 0.13                | 0.03                | 0.04                | 0.09                | -                   | -                   | -                   | -                   |
| C3       | Salicornia             | 0.13  | 0.10                | 0.07                | 0.07                | 0.08                | -                   | -                   | -                   | -                   |
| C4       | Salicornia             | 0.13  | 0.09                | 0.06                | 0.03                | 0.04                | -                   | -                   | -                   | -                   |
| R2       | Salicornia             | 0.18  | 0.07                | 0.00                | 0.11                | 0.04                | 0.10                | 0.01                | 0.03                | 0.03                |
| R3       | Salicornia             | 0.2   | 0.13                | 0.05                | 0.12                | 0.04                | 0.12                | 0.05                | 0.10                | 0.06                |
| R4       | Salicornia             | 0.13  | 0.08                | 0.00                | 0.05                | 0.00                | 0.05                | 0.00                | 0.04                | 0.03                |
| R5       | Salicornia             | 0.12  | 0.09                | 0.01                | 0.15                | 0.03                | 0.11                | 0.00                | 0.05                | 0.06                |
| R6       | Salicornia             | 0.2   | 0.15                | 0.02                | 0.11                | 0.03                | 0.08                | 0.02                | 0.05                | 0.08                |
| R7       | Salicornia             | 0.19  | 0.11                | 0.01                | 0.07                | 0.04                | 0.09                | 0.02                | 0.04                | 0.05                |
| R8       | Salicornia             | 0.2   | 0.11                | 0.01                | 0.08                | 0.04                | 0.11                | 0.03                | 0.04                | 0.08                |
| R9       | Salicornia             | 0.19  | 0.11                | 0.01                | 0.12                | 0.03                | 0.09                | 0.03                | 0.07                | 0.05                |
| R10      | Salicornia             | 0.23  | 0.09                | 0.02                | 0.03                | 0.03                | 0.06                | 0.02                | 0.05                | 0.07                |
| R11      | Salicornia             | 0.28  | 0.22                | 0.06                | 0.19                | 0.13                | 0.29                | 0.17                | 0.14                | 0.06                |
| R12      | Salicornia             | 0.3   | 0.14                | 0.04                | 0.10                | 0.08                | 0.14                | 0.05                | 0.01                | 0.09                |
| R13      | Sarcocornia            | 0.23  | 0.10                | 0.02                | -0.01               | 0.04                | 0.09                | 0.01                | 0.04                | 0.06                |
| R14      | Sarcocornia            | 0.24  | 0.13                | 0.07                | 0.12                | 0.08                | 0.14                | 0.07                | 0.08                | 0.09                |
| R15      | Sarcocornia+Sporobolus | 0.35  | 0.11                | 0.06                | 0.21                | 0.10                | 0.07                | 0.05                | 0.15                | 0.12                |
| R16      | Sarcocornia            | 0.25  | 0.12                | 0.05                | 0.10                | 0.07                | 0.14                | 0.07                | 0.10                | 0.09                |
| R17      | Sarcocornia            | 0.26  | 0.16                | 0.23                | 0.21                | 0.05                | 0.15                | 0.11                | 0.14                | 0.06                |
| R18      | Sarcocornia            | 0.27  | 0.10                | 0.03                | 0.09                | 0.03                | 0.10                | 0.04                | 0.04                | 0.08                |
| R19      | Sarcocornia            | 0.27  | 0.12                | 0.03                | 0.05                | 0.05                | 0.09                | 0.04                | 0.09                | 0.11                |
| R20      | Sarcocornia            | 0.29  | 0.17                | 0.11                | 0.15                | 0.08                | 0.17                | 0.09                | 0.09                | 0.11                |
| R21      | Sarcocornia            | 0.23  | 0.11                | 0.00                | 0.02                | 0.05                | 0.12                | 0.01                | 0.07                | 0.07                |
| R22      | Sarcocornia            | 0.28  | 0.14                | 0.06                | 0.12                | 0.09                | 0.04                | 0.05                | 0.13                | 0.08                |
| R23      | Sarcocornia            | 0.22  | 0.11                | 0.01                | 0.07                | 0.07                | 0.10                | 0.02                | 0.09                | 0.09                |
| R24      | Sarcocornia            | 0.27  | 0.16                | 0.14                | 0.16                | 0.10                | 0.20                | 0.11                | 0.17                | 0.12                |
| R25      | Sarcocornia            | 0.21  | 0.13                | 0.04                | 0.10                | 0.08                | 0.12                | 0.06                | 0.10                | 0.09                |
| R26      | Sarcocornia            | 0.2   | 0.35                | 0.42                | 0.17                | 0.07                | 0.35                | 0.35                | 0.16                | 0.12                |
| R27      | Sarcocornia            | 0.2   | 0.09                | 0.05                | 0.10                | 0.06                | 0.12                | 0.05                | 0.14                | 0.10                |
| R28      | Sarcocornia            | 0.23  | 0.18                | 0.08                | 0.27                | 0.08                | 0.15                | 0.16                | 0.18                | 0.10                |
| R29      | Sarcocornia            | 0.23  | 0.11                | 0.02                | 0.10                | 0.04                | 0.07                | 0.04                | 0.05                | 0.05                |
| R30      | Sarcocornia            | 0.26  | 0.13                | 0.05                | 0.05                | 0.01                | 0.14                | 0.03                | 0.06                | 0.08                |
| R31      | Sarcocornia            | 0.26  | 0.14                | 0.05                | 0.10                | 0.06                | 0.11                | 0.05                | 0.11                | 0.13                |
| R32      | Sarcocornia            | 0.21  | 0.02                | 0.02                | 0.00                | 0.03                | 0.07                | 0.01                | 0.01                | 0.08                |
| R33      | Sarcocornia            | 0.21  | 0.10                | 0.00                | 0.08                | 0.08                | 0.10                | 0.00                | 0.07                | 0.10                |
| R34      | Sarcocornia            | 0.28  | 0.12                | 0.03                | 0.10                | 0.10                | 0.13                | 0.03                | 0.10                | 0.11                |
| R35      | Sarcocornia            | 0.27  | 0.17                | 0.07                | 0.09                | 0.12                | 0.19                | 0.08                | 0.09                | 0.14                |
| R36      | Sarcocornia            | 0.28  | 0.22                | 0.08                | 0.08                | 0.10                | 0.18                | 0.05                | 0.09                | 0.12                |
| R37      | Sarcocornia            | 0.2   | 0.08                | 0.03                | 0.07                | 0.10                | 0.12                | 0.05                | 0.10                | 0.06                |

|     |                        |      |      |      |      |      |      |      |      |      |
|-----|------------------------|------|------|------|------|------|------|------|------|------|
| R38 | Sarcocornia            | 0.24 | 0.16 | 0.11 | 0.24 | 0.09 | 0.38 | 0.14 | 0.17 | 0.11 |
| R39 | Sarcocornia            | 0.29 | 0.13 | 0.05 | 0.11 | 0.07 | 0.12 | 0.05 | 0.10 | 0.09 |
| R40 | Sarcocornia            | 0.22 | 0.10 | 0.06 | 0.11 | 0.09 | 0.11 | 0.07 | 0.10 | 0.10 |
| R41 | Sarcocornia            | 0.21 | 0.08 | 0.04 | 0.06 | 0.04 | 0.13 | 0.02 | 0.05 | 0.05 |
| R42 | Sarcocornia            | 0.2  | 0.13 | 0.08 | 0.08 | 0.07 | 0.11 | 0.09 | 0.08 | 0.11 |
| R43 | Sarcocornia+Sporobolus | 0.34 | 0.09 | 0.02 | 0.04 | 0.03 | 0.08 | 0.01 | 0.04 | 0.06 |
| R44 | Sarcocornia            | 0.19 | 0.07 | 0.05 | 0.03 | 0.11 | 0.09 | 0.06 | 0.04 | 0.13 |
| R45 | Sarcocornia            | 0.29 | 0.13 | 0.08 | 0.10 | 0.04 | 0.09 | 0.05 | 0.07 | 0.02 |
| R46 | Salicornia             | 0.17 | 0.10 | 0.02 | 0.13 | 0.02 | 0.07 | 0.02 | 0.11 | 0.08 |
| R47 | Salicornia             | 0.18 | 0.08 | 0.04 | 0.13 | 0.07 | 0.05 | 0.05 | 0.09 | 0.06 |
| R48 | Salicornia             | 0.17 | 0.14 | 0.02 | 0.02 | 0.06 | 0.12 | 0.03 | 0.07 | 0.06 |
| R49 | Salicornia             | 0.14 | 0.13 | 0.03 | 0.04 | 0.07 | 0.09 | 0.04 | 0.02 | 0.08 |
| R50 | Salicornia             | 0.14 | 0.10 | 0.04 | 0.12 | 0.06 | 0.08 | 0.04 | 0.08 | 0.09 |
| R51 | Salicornia             | 0.15 | 0.55 | 0.08 | 0.10 | 0.04 | 0.16 | 0.09 | 0.09 | 0.08 |
| R52 | Salicornia             | 0.13 | 0.18 | 0.05 | 0.09 | 0.09 | 0.15 | 0.06 | 0.06 | 0.10 |
| R53 | Sarcocornia            | 0.25 | 0.10 | 0.06 | 0.21 | 0.08 | 0.12 | 0.09 | 0.10 | 0.14 |
| R54 | Sarcocornia            | 0.2  | 0.14 | 0.16 | 0.09 | 0.08 | 0.25 | 0.24 | 0.08 | 0.09 |
| R55 | Sarcocornia            | 0.29 | 0.20 | 0.10 | 0.15 | 0.08 | 0.14 | 0.06 | 0.11 | 0.13 |
| R56 | Sarcocornia            | 0.13 | 0.22 | 0.04 | 0.20 | 0.08 | 0.19 | 0.08 | 0.12 | 0.10 |

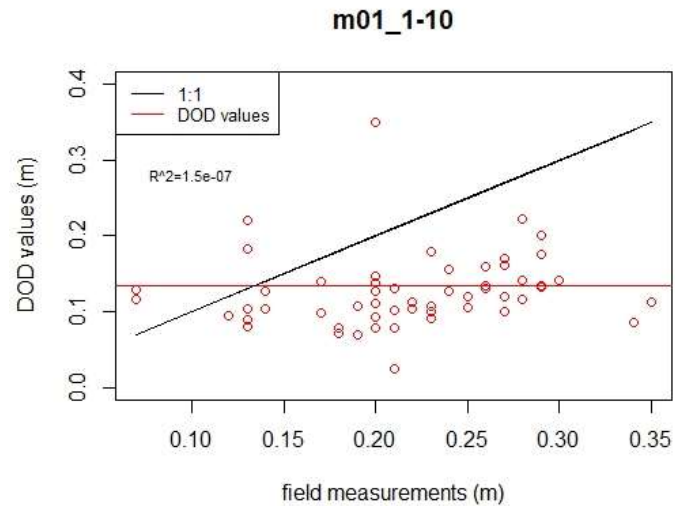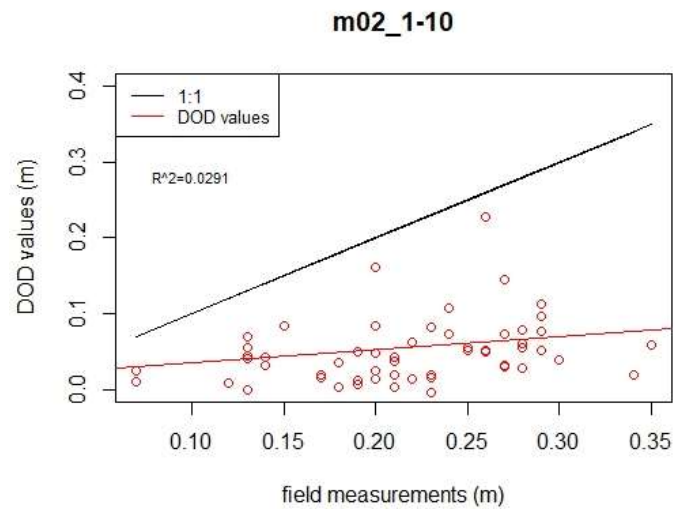

Figure S23. (Continue)

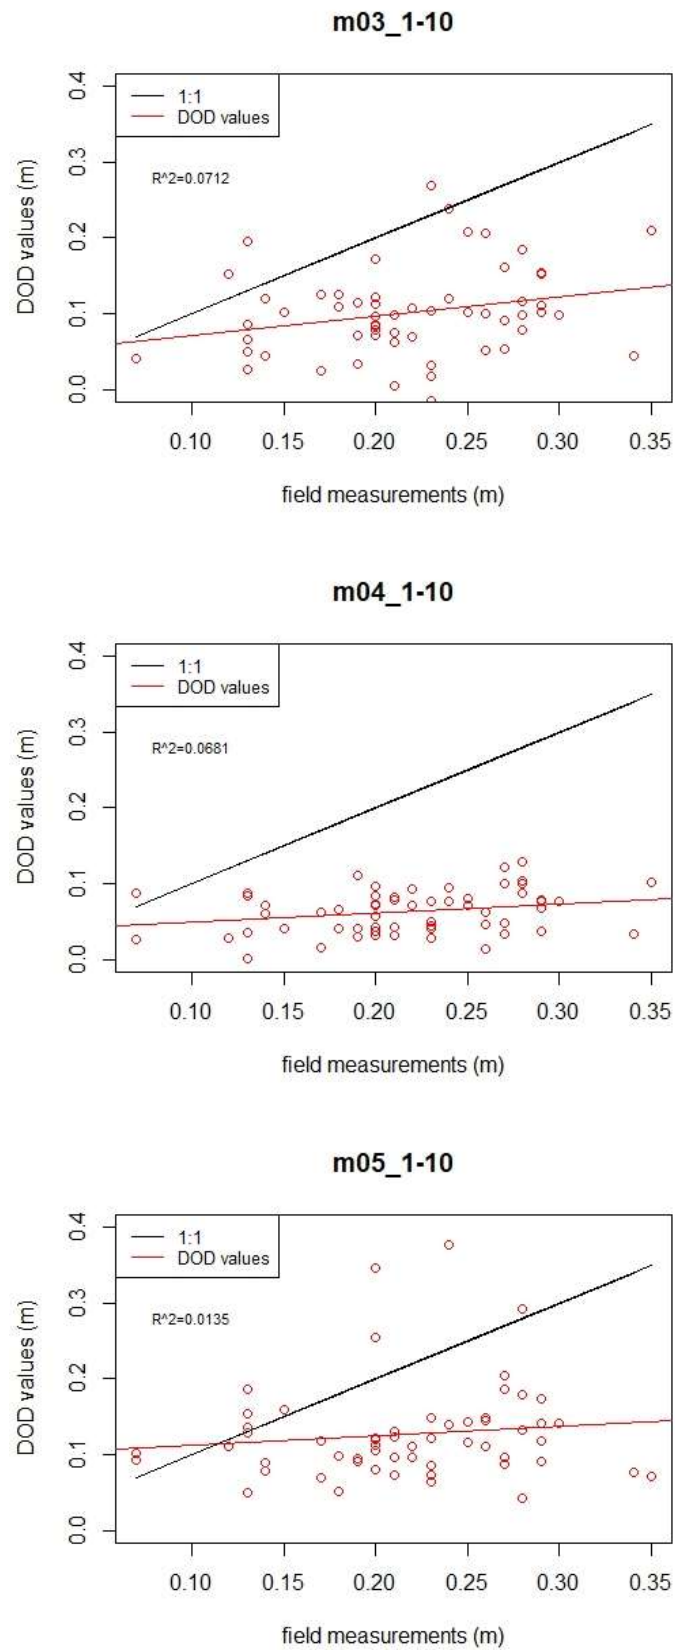

Figure S23. (Continue)

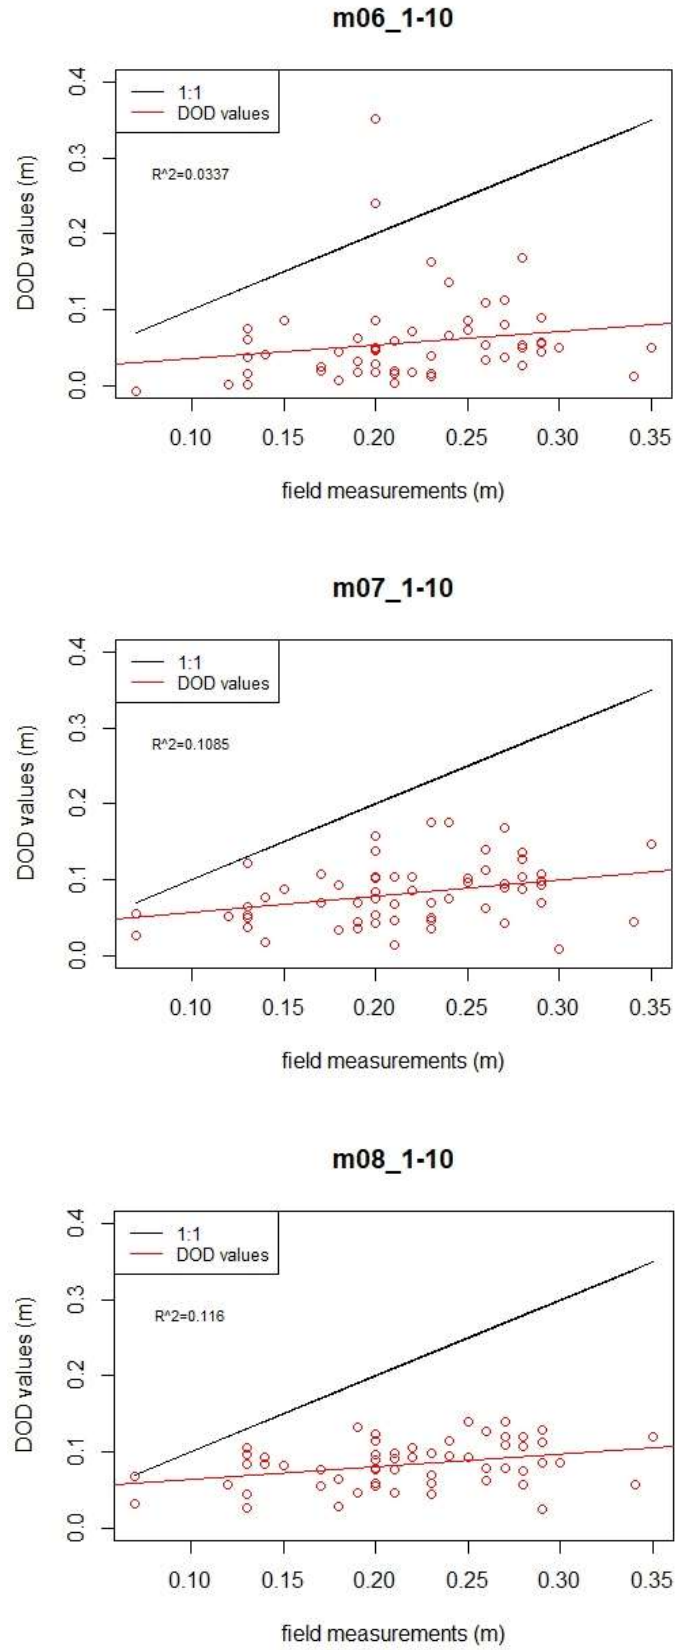

Figure S23. Linear regression and  $R^2$  value for  $DOD_{1-10}$  for all the eight missions compared to vegetation height values of GCPs. The red line is the regression line for the compared datasets, the black line represents the 1:1 pattern.

Table S66. Values of difference from field measurements for  $DOD_{1-10}$  for the eight missions at each point. Each column identifies the mission:  $m01_{1-10}$  represents data extracted from  $DOD_{1-10}$  of mission 1, and so on. Values expressed in meters. Negative values underestimate canopy height, positive values overestimate canopy height. The average RMSE defining the output for each mission is shown at the bottom of the respective column.

| Point Id | $m01_{1-10}$ | $m02_{1-10}$ | $m03_{1-10}$ | $m04_{1-10}$ | $m05_{1-10}$ | $m06_{1-10}$ | $m07_{1-10}$ | $m08_{1-10}$ |
|----------|--------------|--------------|--------------|--------------|--------------|--------------|--------------|--------------|
| C1       | 0.05         | -0.06        | -0.03        | -0.04        |              |              |              |              |
| C2       | 0.06         | -0.04        | -0.03        | 0.02         |              |              |              |              |
| C3       | -0.03        | -0.06        | -0.06        | -0.05        |              |              |              |              |
| C4       | -0.04        | -0.07        | -0.10        | -0.09        |              |              |              |              |
| R2       | -0.11        | -0.18        | -0.07        | -0.14        | -0.08        | -0.17        | -0.15        | -0.15        |
| R3       | -0.07        | -0.15        | -0.08        | -0.16        | -0.08        | -0.15        | -0.10        | -0.14        |
| R4       | -0.05        | -0.13        | -0.08        | -0.13        | -0.08        | -0.13        | -0.09        | -0.10        |
| R5       | -0.03        | -0.11        | 0.03         | -0.09        | -0.01        | -0.12        | -0.07        | -0.06        |
| R6       | -0.05        | -0.18        | -0.09        | -0.17        | -0.12        | -0.18        | -0.15        | -0.12        |
| R7       | -0.08        | -0.18        | -0.12        | -0.15        | -0.10        | -0.17        | -0.15        | -0.14        |
| R8       | -0.09        | -0.19        | -0.12        | -0.16        | -0.09        | -0.17        | -0.16        | -0.12        |
| R9       | -0.08        | -0.18        | -0.07        | -0.16        | -0.10        | -0.16        | -0.12        | -0.14        |
| R10      | -0.14        | -0.21        | -0.20        | -0.20        | -0.17        | -0.21        | -0.18        | -0.16        |
| R11      | -0.06        | -0.22        | -0.09        | -0.15        | 0.01         | -0.11        | -0.14        | -0.22        |
| R12      | -0.16        | -0.26        | -0.20        | -0.22        | -0.16        | -0.25        | -0.29        | -0.21        |
| R13      | -0.13        | -0.21        | -0.24        | -0.19        | -0.14        | -0.22        | -0.19        | -0.17        |
| R14      | -0.11        | -0.17        | -0.12        | -0.16        | -0.10        | -0.17        | -0.16        | -0.15        |
| R15      | -0.24        | -0.29        | -0.14        | -0.25        | -0.28        | -0.30        | -0.20        | -0.23        |
| R16      | -0.13        | -0.20        | -0.15        | -0.18        | -0.11        | -0.18        | -0.15        | -0.16        |
| R17      | -0.10        | -0.03        | -0.05        | -0.21        | -0.11        | -0.15        | -0.12        | -0.20        |
| R18      | -0.17        | -0.24        | -0.18        | -0.24        | -0.17        | -0.23        | -0.23        | -0.19        |
| R19      | -0.15        | -0.24        | -0.22        | -0.22        | -0.18        | -0.23        | -0.18        | -0.16        |
| R20      | -0.12        | -0.18        | -0.14        | -0.21        | -0.12        | -0.20        | -0.20        | -0.18        |
| R21      | -0.12        | -0.23        | -0.21        | -0.18        | -0.11        | -0.22        | -0.16        | -0.16        |
| R22      | -0.14        | -0.22        | -0.16        | -0.19        | -0.24        | -0.23        | -0.15        | -0.20        |
| R23      | -0.11        | -0.21        | -0.15        | -0.15        | -0.12        | -0.20        | -0.13        | -0.13        |
| R24      | -0.11        | -0.13        | -0.11        | -0.17        | -0.07        | -0.16        | -0.10        | -0.15        |
| R25      | -0.08        | -0.17        | -0.11        | -0.13        | -0.09        | -0.15        | -0.11        | -0.12        |
| R26      | 0.15         | 0.22         | -0.03        | -0.13        | 0.15         | 0.15         | -0.04        | -0.08        |
| R27      | -0.11        | -0.15        | -0.10        | -0.14        | -0.08        | -0.15        | -0.06        | -0.10        |
| R28      | -0.05        | -0.15        | 0.04         | -0.15        | -0.08        | -0.07        | -0.05        | -0.13        |
| R29      | -0.12        | -0.21        | -0.13        | -0.19        | -0.16        | -0.19        | -0.18        | -0.18        |
| R30      | -0.13        | -0.21        | -0.21        | -0.25        | -0.12        | -0.23        | -0.20        | -0.18        |
| R31      | -0.12        | -0.21        | -0.16        | -0.20        | -0.15        | -0.21        | -0.15        | -0.13        |
| R32      | -0.19        | -0.19        | -0.21        | -0.18        | -0.14        | -0.20        | -0.20        | -0.13        |
| R33      | -0.11        | -0.21        | -0.13        | -0.13        | -0.11        | -0.21        | -0.14        | -0.11        |
| R34      | -0.16        | -0.25        | -0.18        | -0.18        | -0.15        | -0.25        | -0.18        | -0.17        |
| R35      | -0.10        | -0.20        | -0.18        | -0.15        | -0.08        | -0.19        | -0.18        | -0.13        |
| R36      | -0.06        | -0.20        | -0.20        | -0.18        | -0.10        | -0.23        | -0.19        | -0.16        |
| R37      | -0.12        | -0.17        | -0.13        | -0.10        | -0.08        | -0.15        | -0.10        | -0.14        |
| R38      | -0.08        | -0.13        | 0.00         | -0.15        | 0.14         | -0.10        | -0.07        | -0.13        |
| R39      | -0.16        | -0.24        | -0.18        | -0.22        | -0.17        | -0.24        | -0.19        | -0.20        |
| R40      | -0.12        | -0.16        | -0.11        | -0.13        | -0.11        | -0.15        | -0.12        | -0.12        |
| R41      | -0.13        | -0.17        | -0.15        | -0.17        | -0.08        | -0.19        | -0.16        | -0.16        |
| R42      | -0.07        | -0.12        | -0.12        | -0.13        | -0.09        | -0.11        | -0.12        | -0.09        |
| R43      | -0.25        | -0.32        | -0.30        | -0.31        | -0.26        | -0.33        | -0.30        | -0.28        |
| R44      | -0.12        | -0.14        | -0.16        | -0.08        | -0.10        | -0.13        | -0.15        | -0.06        |
| R45      | -0.16        | -0.21        | -0.19        | -0.25        | -0.20        | -0.24        | -0.22        | -0.27        |
| R46      | -0.07        | -0.15        | -0.04        | -0.15        | -0.10        | -0.15        | -0.06        | -0.09        |
| R47      | -0.10        | -0.14        | -0.06        | -0.11        | -0.13        | -0.13        | -0.09        | -0.12        |
| R48      | -0.03        | -0.15        | -0.15        | -0.11        | -0.05        | -0.14        | -0.10        | -0.11        |

|          |       |       |       |       |       |       |       |       |
|----------|-------|-------|-------|-------|-------|-------|-------|-------|
| R49      | -0.01 | -0.11 | -0.10 | -0.07 | -0.05 | -0.10 | -0.12 | -0.06 |
| R50      | -0.04 | -0.10 | -0.02 | -0.08 | -0.06 | -0.10 | -0.06 | -0.05 |
| R51      | 0.40  | -0.07 | -0.05 | -0.11 | 0.01  | -0.06 | -0.06 | -0.07 |
| R52      | 0.05  | -0.08 | -0.04 | -0.04 | 0.02  | -0.07 | -0.07 | -0.03 |
| R53      | -0.15 | -0.19 | -0.04 | -0.17 | -0.13 | -0.16 | -0.15 | -0.11 |
| R54      | -0.06 | -0.04 | -0.11 | -0.12 | 0.05  | 0.04  | -0.12 | -0.11 |
| R55      | -0.09 | -0.19 | -0.14 | -0.21 | -0.15 | -0.23 | -0.18 | -0.16 |
| R56      | 0.09  | -0.09 | 0.07  | -0.05 | 0.06  | -0.05 | -0.01 | -0.03 |
| PROMEDIO | -0.09 | -0.17 | -0.12 | -0.16 | -0.10 | -0.16 | -0.14 | -0.14 |
| MEDIANA  | -0.11 | -0.18 | -0.12 | -0.16 | -0.10 | -0.17 | -0.15 | -0.14 |
| RMSE     | 0.125 | 0.179 | 0.136 | 0.164 | 0.125 | 0.182 | 0.152 | 0.150 |

Table S67. Field values of vegetation height measured at GCPs ('field' column) and values extracted from DOD<sub>1-15</sub> for the eight missions. For each point corresponding specie ('spp' column) is also reported. Each column identifies the mission: m01<sub>1-15</sub> represents data extracted from DOD<sub>1-15</sub> of mission 1, and so on. Values expressed in meters.

| Point Id | spp                    | field | m01 <sub>1-15</sub> | m02 <sub>1-15</sub> | m03 <sub>1-15</sub> | m04 <sub>1-15</sub> | m05 <sub>1-15</sub> | m06 <sub>1-15</sub> | m07 <sub>1-15</sub> | m08 <sub>1-15</sub> |
|----------|------------------------|-------|---------------------|---------------------|---------------------|---------------------|---------------------|---------------------|---------------------|---------------------|
| C1       | Salicornia             | 0.07  | 0.11                | 0.01                | 0.04                | 0.03                | -                   | -                   | -                   | -                   |
| C2       | Salicornia             | 0.07  | 0.12                | 0.02                | 0.04                | 0.09                | -                   | -                   | -                   | -                   |
| C3       | Salicornia             | 0.13  | 0.11                | 0.07                | 0.07                | 0.09                | -                   | -                   | -                   | -                   |
| C4       | Salicornia             | 0.13  | 0.09                | 0.05                | 0.02                | 0.03                | -                   | -                   | -                   | -                   |
| R2       | Salicornia             | 0.18  | 0.07                | 0.00                | 0.10                | 0.04                | 0.09                | 0.00                | 0.03                | 0.03                |
| R3       | Salicornia             | 0.20  | 0.13                | 0.05                | 0.13                | 0.05                | 0.12                | 0.05                | 0.11                | 0.06                |
| R4       | Salicornia             | 0.13  | 0.08                | 0.00                | 0.05                | 0.00                | 0.05                | 0.00                | 0.03                | 0.02                |
| R5       | Salicornia             | 0.12  | 0.10                | 0.01                | 0.15                | 0.03                | 0.10                | 0.00                | 0.05                | 0.06                |
| R6       | Salicornia             | 0.20  | 0.14                | 0.03                | 0.12                | 0.03                | 0.08                | 0.02                | 0.05                | 0.08                |
| R7       | Salicornia             | 0.19  | 0.11                | 0.01                | 0.07                | 0.04                | 0.09                | 0.02                | 0.04                | 0.05                |
| R8       | Salicornia             | 0.20  | 0.10                | 0.01                | 0.08                | 0.04                | 0.11                | 0.03                | 0.04                | 0.07                |
| R9       | Salicornia             | 0.19  | 0.10                | 0.01                | 0.11                | 0.03                | 0.10                | 0.03                | 0.07                | 0.05                |
| R10      | Salicornia             | 0.23  | 0.09                | 0.02                | 0.03                | 0.03                | 0.06                | 0.02                | 0.05                | 0.07                |
| R11      | Salicornia             | 0.28  | 0.29                | 0.09                | 0.18                | 0.16                | 0.09                | 0.14                | 0.16                | 0.10                |
| R12      | Salicornia             | 0.30  | 0.14                | 0.04                | 0.09                | 0.08                | 0.14                | 0.05                | 0.00                | 0.08                |
| R13      | Sarcocornia            | 0.23  | 0.10                | 0.01                | -0.01               | 0.04                | 0.08                | 0.01                | 0.02                | 0.06                |
| R14      | Sarcocornia            | 0.24  | 0.13                | 0.07                | 0.10                | 0.07                | 0.14                | 0.07                | 0.08                | 0.08                |
| R15      | Sarcocornia+Sporobolus | 0.35  | 0.11                | 0.05                | 0.20                | 0.10                | 0.08                | 0.05                | 0.15                | 0.12                |
| R16      | Sarcocornia            | 0.25  | 0.15                | 0.10                | 0.12                | 0.08                | 0.14                | 0.06                | 0.11                | 0.10                |
| R17      | Sarcocornia            | 0.26  | 0.16                | 0.28                | 0.23                | 0.05                | 0.15                | 0.29                | 0.19                | 0.06                |
| R18      | Sarcocornia            | 0.27  | 0.11                | 0.03                | 0.09                | 0.04                | 0.09                | 0.04                | 0.03                | 0.08                |
| R19      | Sarcocornia            | 0.27  | 0.11                | 0.03                | 0.06                | 0.05                | 0.07                | 0.03                | 0.12                | 0.11                |
| R20      | Sarcocornia            | 0.29  | 0.20                | 0.13                | 0.16                | 0.09                | 0.17                | 0.08                | 0.09                | 0.09                |
| R21      | Sarcocornia            | 0.23  | 0.11                | 0.00                | 0.02                | 0.05                | 0.10                | 0.01                | 0.07                | 0.07                |
| R22      | Sarcocornia            | 0.28  | 0.16                | 0.06                | 0.11                | 0.09                | 0.12                | 0.06                | 0.12                | 0.07                |
| R23      | Sarcocornia            | 0.22  | 0.10                | 0.01                | 0.07                | 0.07                | 0.10                | 0.02                | 0.09                | 0.09                |
| R24      | Sarcocornia            | 0.27  | 0.15                | 0.07                | 0.18                | 0.07                | 0.20                | 0.10                | 0.16                | 0.11                |
| R25      | Sarcocornia            | 0.21  | 0.13                | 0.04                | 0.10                | 0.08                | 0.12                | 0.05                | 0.09                | 0.10                |
| R26      | Sarcocornia            | 0.20  | 0.35                | 0.38                | 0.14                | 0.11                | 0.35                | 0.07                | 0.20                | 0.11                |
| R27      | Sarcocornia            | 0.20  | 0.09                | 0.04                | 0.10                | 0.06                | 0.12                | 0.04                | 0.13                | 0.10                |
| R28      | Sarcocornia            | 0.23  | 0.12                | 0.09                | 0.26                | 0.20                | 0.13                | 0.17                | 0.20                | 0.05                |
| R29      | Sarcocornia            | 0.23  | 0.13                | 0.06                | 0.12                | 0.05                | 0.06                | 0.05                | 0.03                | 0.05                |
| R30      | Sarcocornia            | 0.26  | 0.13                | 0.04                | 0.06                | 0.01                | 0.14                | 0.03                | 0.05                | 0.08                |
| R31      | Sarcocornia            | 0.26  | 0.14                | 0.05                | 0.08                | 0.06                | 0.11                | 0.05                | 0.09                | 0.13                |
| R32      | Sarcocornia            | 0.21  | 0.02                | 0.02                | -0.01               | 0.04                | 0.04                | 0.02                | 0.01                | 0.08                |
| R33      | Sarcocornia            | 0.21  | 0.10                | 0.01                | 0.08                | 0.08                | 0.10                | 0.01                | 0.07                | 0.10                |
| R34      | Sarcocornia            | 0.28  | 0.11                | 0.03                | 0.09                | 0.11                | 0.13                | 0.03                | 0.11                | 0.10                |
| R35      | Sarcocornia            | 0.27  | 0.18                | 0.07                | 0.09                | 0.11                | 0.19                | 0.09                | 0.09                | 0.14                |
| R36      | Sarcocornia            | 0.28  | 0.20                | 0.06                | 0.08                | 0.10                | 0.18                | 0.07                | 0.09                | 0.12                |

|     |                        |      |      |       |      |      |      |      |      |      |
|-----|------------------------|------|------|-------|------|------|------|------|------|------|
| R37 | Sarcocornia            | 0.20 | 0.08 | 0.04  | 0.06 | 0.10 | 0.13 | 0.05 | 0.09 | 0.05 |
| R38 | Sarcocornia            | 0.24 | 0.25 | 0.12  | 0.14 | 0.10 | 0.23 | 0.14 | 0.17 | 0.12 |
| R39 | Sarcocornia            | 0.29 | 0.14 | 0.05  | 0.09 | 0.07 | 0.12 | 0.05 | 0.09 | 0.09 |
| R40 | Sarcocornia            | 0.22 | 0.10 | 0.05  | 0.11 | 0.09 | 0.11 | 0.08 | 0.09 | 0.10 |
| R41 | Sarcocornia            | 0.21 | 0.08 | 0.04  | 0.06 | 0.04 | 0.13 | 0.02 | 0.05 | 0.05 |
| R42 | Sarcocornia            | 0.20 | 0.12 | 0.09  | 0.08 | 0.07 | 0.11 | 0.08 | 0.09 | 0.12 |
| R43 | Sarcocornia+Sporobolus | 0.34 | 0.09 | 0.03  | 0.05 | 0.03 | 0.07 | 0.01 | 0.04 | 0.06 |
| R44 | Sarcocornia            | 0.19 | 0.08 | 0.05  | 0.04 | 0.11 | 0.08 | 0.07 | 0.05 | 0.13 |
| R45 | Sarcocornia            | 0.29 | 0.13 | 0.09  | 0.11 | 0.04 | 0.09 | 0.06 | 0.07 | 0.03 |
| R46 | Salicornia             | 0.17 | 0.10 | 0.02  | 0.13 | 0.02 | 0.07 | 0.03 | 0.11 | 0.08 |
| R47 | Salicornia             | 0.18 | 0.08 | 0.04  | 0.14 | 0.07 | 0.05 | 0.05 | 0.08 | 0.06 |
| R48 | Salicornia             | 0.17 | 0.15 | 0.02  | 0.04 | 0.06 | 0.13 | 0.02 | 0.08 | 0.05 |
| R49 | Salicornia             | 0.14 | 0.10 | 0.03  | 0.04 | 0.08 | 0.09 | 0.04 | 0.01 | 0.08 |
| R50 | Salicornia             | 0.14 | 0.11 | 0.05  | 0.12 | 0.06 | 0.08 | 0.04 | 0.08 | 0.09 |
| R51 | Salicornia             | 0.15 | 0.55 | 0.10  | 0.10 | 0.05 | 0.16 | 0.07 | 0.09 | 0.09 |
| R52 | Salicornia             | 0.13 | 0.17 | 0.05  | 0.09 | 0.08 | 0.14 | 0.06 | 0.06 | 0.11 |
| R53 | Sarcocornia            | 0.25 | 0.11 | 0.06  | 0.19 | 0.08 | 0.12 | 0.09 | 0.10 | 0.14 |
| R54 | Sarcocornia            | 0.20 | 0.15 | 0.16  | 0.09 | 0.08 | 0.28 | 0.17 | 0.09 | 0.09 |
| R55 | Sarcocornia            | 0.29 | 0.21 | 0.11  | 0.16 | 0.08 | 0.16 | 0.07 | 0.10 | 0.14 |
| R56 | Sarcocornia            | 0.13 | 0.22 | -0.01 | 0.17 | 0.07 | 0.18 | 0.09 | 0.13 | 0.09 |

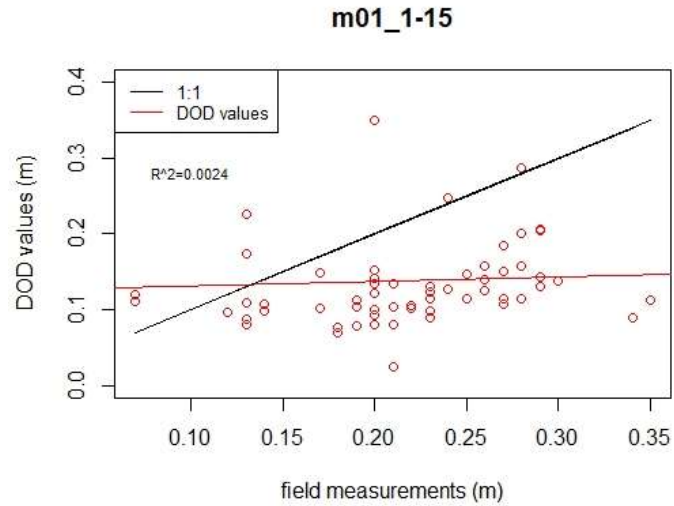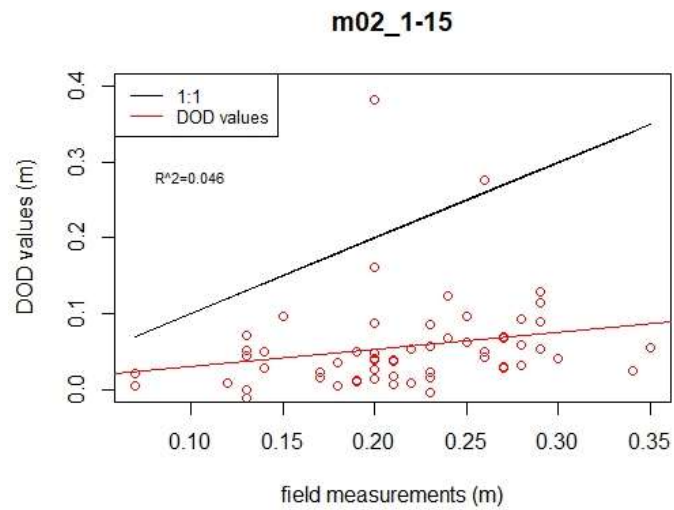

Figure S24. (Continue)

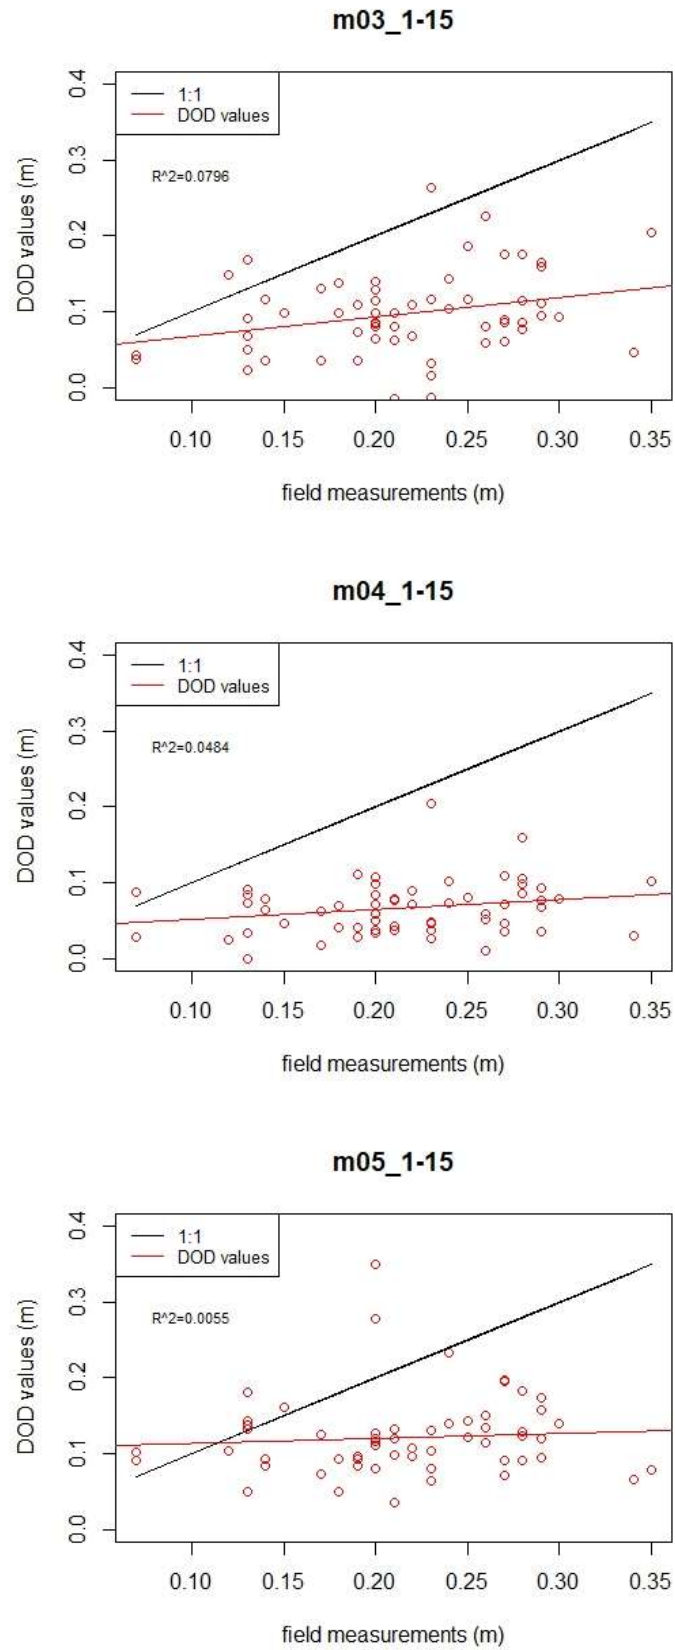

Figure S24. (Continue)

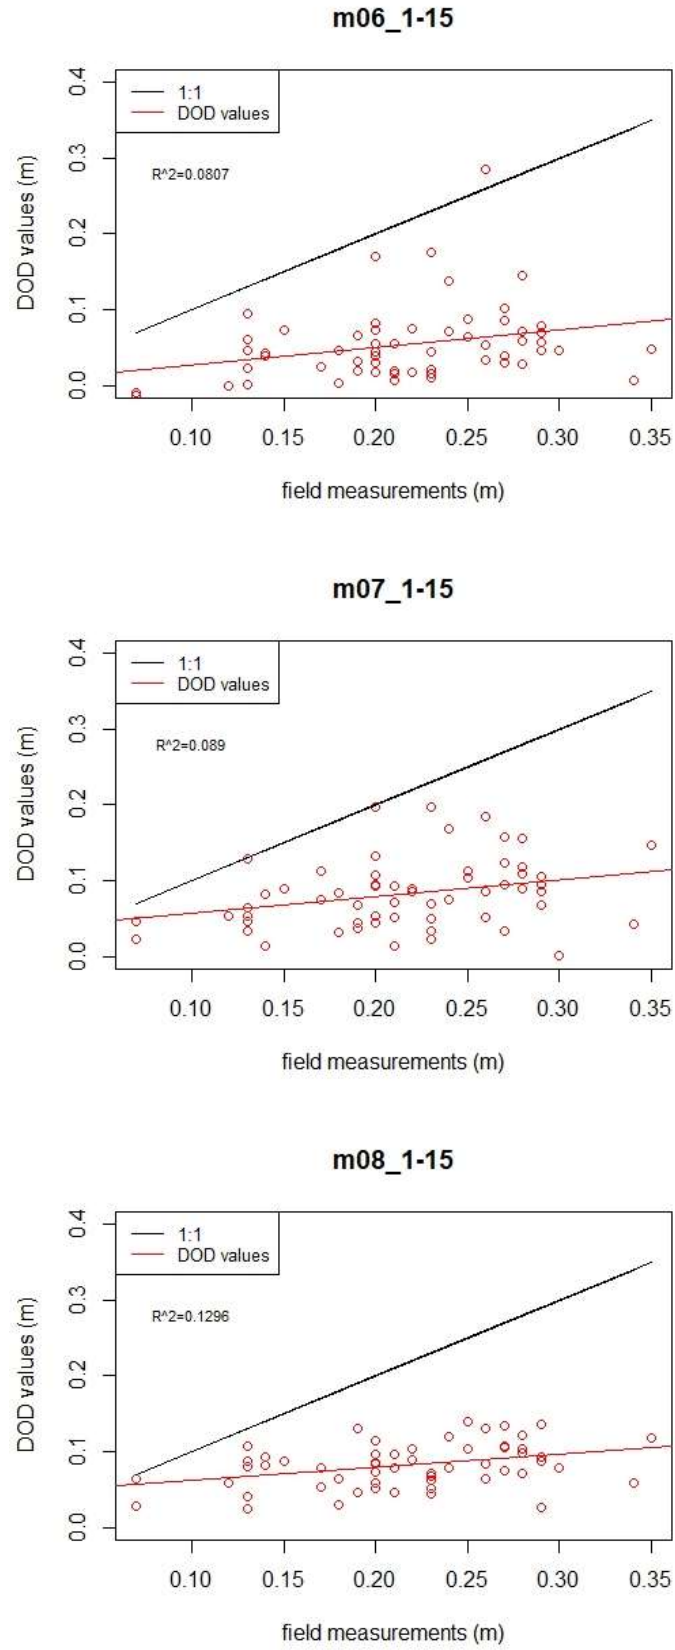

Figure S24. Linear regression and  $R^2$  value for  $DOD_{1-15}$  for all the eight missions compared to vegetation height values of GCPs. The red line is the regression line for the compared datasets, the black line represents the 1:1 pattern.

Table S68. Values of difference from field measurements for  $DOD_{1-15}$  for the eight missions at each point. Each column identifies the mission:  $m01_{1-15}$  represents data extracted from  $DOD_{1-15}$  of mission 1, and so on. Values expressed in meters. Negative values underestimate canopy height, positive values overestimate canopy height. The average RMSE defining the output for each mission is shown at the bottom of the respective column.

| Point Id | $m01_{1-15}$ | $m02_{1-15}$ | $m03_{1-15}$ | $m04_{1-15}$ | $m05_{1-15}$ | $m06_{1-15}$ | $m07_{1-15}$ | $m08_{1-15}$ |
|----------|--------------|--------------|--------------|--------------|--------------|--------------|--------------|--------------|
| C1       | 0.04         | -0.06        | -0.03        | -0.04        | -            | -            | -            | -            |
| C2       | 0.05         | -0.05        | -0.03        | 0.02         | -            | -            | -            | -            |
| C3       | -0.02        | -0.06        | -0.06        | -0.04        | -            | -            | -            | -            |
| C4       | -0.04        | -0.08        | -0.11        | -0.10        | -            | -            | -            | -            |
| R2       | -0.11        | -0.18        | -0.08        | -0.14        | -0.09        | -0.18        | -0.15        | -0.15        |
| R3       | -0.07        | -0.15        | -0.07        | -0.15        | -0.08        | -0.15        | -0.09        | -0.14        |
| R4       | -0.05        | -0.13        | -0.08        | -0.13        | -0.08        | -0.13        | -0.10        | -0.11        |
| R5       | -0.02        | -0.11        | 0.03         | -0.09        | -0.02        | -0.12        | -0.07        | -0.06        |
| R6       | -0.06        | -0.17        | -0.08        | -0.17        | -0.12        | -0.18        | -0.15        | -0.12        |
| R7       | -0.08        | -0.18        | -0.12        | -0.15        | -0.10        | -0.17        | -0.15        | -0.14        |
| R8       | -0.10        | -0.19        | -0.12        | -0.16        | -0.09        | -0.17        | -0.16        | -0.13        |
| R9       | -0.09        | -0.18        | -0.08        | -0.16        | -0.09        | -0.16        | -0.12        | -0.14        |
| R10      | -0.14        | -0.21        | -0.20        | -0.20        | -0.17        | -0.21        | -0.18        | -0.16        |
| R11      | 0.01         | -0.19        | -0.10        | -0.12        | -0.19        | -0.14        | -0.12        | -0.18        |
| R12      | -0.16        | -0.26        | -0.21        | -0.22        | -0.16        | -0.25        | -0.30        | -0.22        |
| R13      | -0.13        | -0.22        | -0.24        | -0.19        | -0.15        | -0.22        | -0.21        | -0.17        |
| R14      | -0.11        | -0.17        | -0.14        | -0.17        | -0.10        | -0.17        | -0.16        | -0.16        |
| R15      | -0.24        | -0.30        | -0.15        | -0.25        | -0.27        | -0.30        | -0.20        | -0.23        |
| R16      | -0.10        | -0.15        | -0.13        | -0.17        | -0.11        | -0.19        | -0.14        | -0.15        |
| R17      | -0.10        | 0.02         | -0.03        | -0.21        | -0.11        | 0.03         | -0.07        | -0.20        |
| R18      | -0.16        | -0.24        | -0.18        | -0.23        | -0.18        | -0.23        | -0.24        | -0.19        |
| R19      | -0.16        | -0.24        | -0.21        | -0.22        | -0.20        | -0.24        | -0.15        | -0.16        |
| R20      | -0.09        | -0.16        | -0.13        | -0.20        | -0.12        | -0.21        | -0.20        | -0.20        |
| R21      | -0.12        | -0.23        | -0.21        | -0.18        | -0.13        | -0.22        | -0.16        | -0.16        |
| R22      | -0.12        | -0.22        | -0.17        | -0.19        | -0.16        | -0.22        | -0.16        | -0.21        |
| R23      | -0.12        | -0.21        | -0.15        | -0.15        | -0.12        | -0.20        | -0.13        | -0.13        |
| R24      | -0.12        | -0.20        | -0.09        | -0.20        | -0.07        | -0.17        | -0.11        | -0.16        |
| R25      | -0.08        | -0.17        | -0.11        | -0.13        | -0.09        | -0.16        | -0.12        | -0.11        |
| R26      | 0.15         | 0.18         | -0.06        | -0.09        | 0.15         | -0.13        | 0.00         | -0.09        |
| R27      | -0.11        | -0.16        | -0.10        | -0.14        | -0.08        | -0.16        | -0.07        | -0.10        |
| R28      | -0.11        | -0.14        | 0.03         | -0.03        | -0.10        | -0.06        | -0.03        | -0.18        |
| R29      | -0.10        | -0.17        | -0.11        | -0.18        | -0.17        | -0.18        | -0.20        | -0.18        |
| R30      | -0.14        | -0.22        | -0.20        | -0.25        | -0.12        | -0.23        | -0.21        | -0.18        |
| R31      | -0.12        | -0.21        | -0.18        | -0.20        | -0.15        | -0.21        | -0.17        | -0.13        |
| R32      | -0.19        | -0.19        | -0.22        | -0.17        | -0.17        | -0.19        | -0.20        | -0.13        |
| R33      | -0.11        | -0.20        | -0.13        | -0.13        | -0.11        | -0.20        | -0.14        | -0.11        |
| R34      | -0.17        | -0.25        | -0.19        | -0.17        | -0.15        | -0.25        | -0.17        | -0.18        |
| R35      | -0.09        | -0.20        | -0.18        | -0.16        | -0.08        | -0.18        | -0.18        | -0.13        |
| R36      | -0.08        | -0.22        | -0.20        | -0.18        | -0.10        | -0.21        | -0.19        | -0.16        |
| R37      | -0.12        | -0.16        | -0.14        | -0.10        | -0.07        | -0.15        | -0.11        | -0.15        |
| R38      | 0.01         | -0.12        | -0.10        | -0.14        | -0.01        | -0.10        | -0.07        | -0.12        |
| R39      | -0.15        | -0.24        | -0.20        | -0.22        | -0.17        | -0.24        | -0.20        | -0.20        |
| R40      | -0.12        | -0.17        | -0.11        | -0.13        | -0.11        | -0.14        | -0.13        | -0.12        |
| R41      | -0.13        | -0.17        | -0.15        | -0.17        | -0.08        | -0.19        | -0.16        | -0.16        |
| R42      | -0.08        | -0.11        | -0.12        | -0.13        | -0.09        | -0.12        | -0.11        | -0.08        |
| R43      | -0.25        | -0.31        | -0.29        | -0.31        | -0.27        | -0.33        | -0.30        | -0.28        |
| R44      | -0.11        | -0.14        | -0.15        | -0.08        | -0.11        | -0.12        | -0.14        | -0.06        |
| R45      | -0.16        | -0.20        | -0.18        | -0.25        | -0.20        | -0.23        | -0.22        | -0.26        |
| R46      | -0.07        | -0.15        | -0.04        | -0.15        | -0.10        | -0.14        | -0.06        | -0.09        |
| R47      | -0.10        | -0.14        | -0.04        | -0.11        | -0.13        | -0.13        | -0.10        | -0.12        |
| R48      | -0.02        | -0.15        | -0.13        | -0.11        | -0.04        | -0.15        | -0.09        | -0.12        |
| R49      | -0.04        | -0.11        | -0.10        | -0.06        | -0.05        | -0.10        | -0.13        | -0.06        |
| R50      | -0.03        | -0.09        | -0.02        | -0.08        | -0.06        | -0.10        | -0.06        | -0.05        |
| R51      | 0.40         | -0.05        | -0.05        | -0.10        | 0.01         | -0.08        | -0.06        | -0.06        |

|          |       |       |       |       |       |       |       |       |
|----------|-------|-------|-------|-------|-------|-------|-------|-------|
| R52      | 0.04  | -0.08 | -0.04 | -0.05 | 0.01  | -0.07 | -0.07 | -0.02 |
| R53      | -0.14 | -0.19 | -0.06 | -0.17 | -0.13 | -0.16 | -0.15 | -0.11 |
| R54      | -0.05 | -0.04 | -0.11 | -0.12 | 0.08  | -0.03 | -0.11 | -0.11 |
| R55      | -0.08 | -0.18 | -0.13 | -0.21 | -0.13 | -0.22 | -0.19 | -0.15 |
| R56      | 0.09  | -0.14 | 0.04  | -0.06 | 0.05  | -0.04 | 0.00  | -0.04 |
| PROMEDIO | -0.08 | -0.17 | -0.12 | -0.16 | -0.10 | -0.17 | -0.14 | -0.14 |
| MEDIANA  | -0.10 | -0.17 | -0.12 | -0.16 | -0.11 | -0.17 | -0.14 | -0.14 |
| RMSE     | 0.123 | 0.178 | 0.137 | 0.162 | 0.127 | 0.180 | 0.152 | 0.150 |

Table S69. Field values of vegetation height measured at GCPs ('field' column) and values extracted from DOD<sub>3-5</sub> for the eight missions. For each point corresponding specie ('spp' column) is also reported. Each column identifies the mission: m01<sub>3-5</sub> represents data extracted from DOD<sub>3-5</sub> of mission 1, and so on. Values expressed in meters.

| Point Id | spp                    | field | m01 <sub>3-5</sub> | m02 <sub>3-5</sub> | m03 <sub>3-5</sub> | m04 <sub>3-5</sub> | m05 <sub>3-5</sub> | m06 <sub>3-5</sub> | m07 <sub>3-5</sub> | m08 <sub>3-5</sub> |
|----------|------------------------|-------|--------------------|--------------------|--------------------|--------------------|--------------------|--------------------|--------------------|--------------------|
| C1       | Salicornia             | 0.07  | 0.15               | 0.03               | 0.06               | 0.07               | -                  | -                  | -                  | -                  |
| C2       | Salicornia             | 0.07  | 0.16               | 0.03               | 0.11               | 0.09               | -                  | -                  | -                  | -                  |
| C3       | Salicornia             | 0.13  | 0.16               | 0.12               | 0.12               | 0.09               | -                  | -                  | -                  | -                  |
| C4       | Salicornia             | 0.13  | 0.13               | 0.09               | 0.09               | 0.06               | -                  | -                  | -                  | -                  |
| R2       | Salicornia             | 0.18  | 0.10               | 0.02               | 0.12               | 0.07               | 0.13               | 0.01               | 0.07               | 0.09               |
| R3       | Salicornia             | 0.2   | 0.14               | 0.05               | 0.17               | 0.04               | 0.15               | 0.06               | 0.10               | 0.08               |
| R4       | Salicornia             | 0.13  | 0.11               | -0.01              | 0.10               | 0.03               | 0.08               | 0.01               | 0.05               | 0.05               |
| R5       | Salicornia             | 0.12  | 0.14               | 0.02               | 0.16               | 0.04               | 0.12               | 0.03               | 0.06               | 0.09               |
| R6       | Salicornia             | 0.2   | 0.17               | 0.03               | 0.10               | 0.07               | 0.10               | 0.04               | 0.08               | 0.08               |
| R7       | Salicornia             | 0.19  | 0.12               | 0.02               | 0.14               | 0.08               | 0.12               | 0.03               | 0.07               | 0.09               |
| R8       | Salicornia             | 0.2   | 0.14               | 0.03               | 0.10               | 0.07               | 0.14               | 0.04               | 0.09               | 0.07               |
| R9       | Salicornia             | 0.19  | 0.13               | 0.03               | 0.12               | 0.06               | 0.12               | 0.04               | 0.10               | 0.07               |
| R10      | Salicornia             | 0.23  | 0.14               | 0.04               | 0.08               | 0.08               | 0.11               | 0.04               | 0.08               | 0.09               |
| R11      | Salicornia             | 0.28  | 0.36               | 0.22               | 0.23               | 0.22               | 0.35               | 0.32               | 0.14               | 0.14               |
| R12      | Salicornia             | 0.3   | 0.16               | 0.04               | 0.11               | 0.09               | 0.15               | 0.05               | 0.10               | 0.10               |
| R13      | Sarcocornia            | 0.23  | 0.13               | 0.02               | 0.10               | 0.09               | 0.12               | 0.03               | 0.10               | 0.09               |
| R14      | Sarcocornia            | 0.24  | 0.14               | 0.07               | 0.15               | 0.07               | 0.15               | 0.09               | 0.14               | 0.15               |
| R15      | Sarcocornia+Sporobolus | 0.35  | 0.14               | 0.06               | 0.23               | 0.12               | 0.15               | 0.07               | 0.16               | 0.14               |
| R16      | Sarcocornia            | 0.25  | 0.18               | 0.10               | 0.12               | 0.09               | 0.18               | 0.04               | 0.14               | 0.13               |
| R17      | Sarcocornia            | 0.26  | 0.30               | 0.33               | 0.19               | 0.06               | 0.24               | 0.25               | 0.18               | 0.08               |
| R18      | Sarcocornia            | 0.27  | 0.12               | 0.05               | 0.13               | 0.05               | 0.14               | 0.05               | 0.08               | 0.10               |
| R19      | Sarcocornia            | 0.27  | 0.14               | 0.03               | 0.14               | 0.11               | 0.12               | 0.05               | 0.08               | 0.14               |
| R20      | Sarcocornia            | 0.29  | 0.25               | 0.17               | 0.17               | 0.10               | 0.25               | 0.10               | 0.14               | 0.15               |
| R21      | Sarcocornia            | 0.23  | 0.14               | 0.04               | 0.07               | 0.06               | 0.16               | 0.03               | 0.10               | 0.10               |
| R22      | Sarcocornia            | 0.28  | 0.17               | 0.08               | 0.14               | 0.11               | 0.15               | 0.06               | 0.17               | 0.14               |
| R23      | Sarcocornia            | 0.22  | 0.14               | 0.03               | 0.12               | 0.12               | 0.14               | 0.03               | 0.14               | 0.12               |
| R24      | Sarcocornia            | 0.27  | 0.23               | 0.09               | 0.19               | 0.12               | 0.25               | 0.15               | 0.25               | 0.13               |
| R25      | Sarcocornia            | 0.21  | 0.16               | 0.05               | 0.11               | 0.09               | 0.15               | 0.06               | 0.13               | 0.14               |
| R26      | Sarcocornia            | 0.2   | 0.39               | 0.44               | 0.17               | 0.09               | 0.34               | 0.38               | 0.22               | 0.15               |
| R27      | Sarcocornia            | 0.2   | 0.12               | 0.05               | 0.16               | 0.09               | 0.13               | 0.07               | 0.15               | 0.14               |
| R28      | Sarcocornia            | 0.23  | 0.26               | 0.21               | 0.30               | 0.12               | 0.21               | 0.27               | 0.27               | 0.10               |
| R29      | Sarcocornia            | 0.23  | 0.14               | 0.03               | 0.16               | 0.09               | 0.14               | 0.05               | 0.11               | 0.09               |
| R30      | Sarcocornia            | 0.26  | 0.14               | 0.08               | 0.17               | 0.13               | 0.18               | 0.04               | 0.16               | 0.13               |
| R31      | Sarcocornia            | 0.26  | 0.15               | 0.07               | 0.17               | 0.11               | 0.13               | 0.06               | 0.15               | 0.16               |
| R32      | Sarcocornia            | 0.21  | 0.07               | 0.03               | 0.09               | 0.03               | 0.09               | 0.03               | 0.07               | 0.11               |
| R33      | Sarcocornia            | 0.21  | 0.13               | 0.02               | 0.09               | 0.11               | 0.12               | 0.03               | 0.09               | 0.12               |
| R34      | Sarcocornia            | 0.28  | 0.13               | 0.06               | 0.15               | 0.15               | 0.13               | 0.06               | 0.12               | 0.13               |
| R35      | Sarcocornia            | 0.27  | 0.18               | 0.05               | 0.14               | 0.13               | 0.19               | 0.12               | 0.14               | 0.14               |
| R36      | Sarcocornia            | 0.28  | 0.23               | 0.07               | 0.11               | 0.11               | 0.21               | 0.07               | 0.15               | 0.12               |
| R37      | Sarcocornia            | 0.2   | 0.12               | 0.05               | 0.11               | 0.10               | 0.15               | 0.08               | 0.18               | 0.11               |
| R38      | Sarcocornia            | 0.24  | 0.23               | 0.09               | 0.16               | 0.11               | 0.43               | 0.11               | 0.18               | 0.14               |
| R39      | Sarcocornia            | 0.29  | 0.16               | 0.06               | 0.14               | 0.10               | 0.14               | 0.07               | 0.14               | 0.15               |
| R40      | Sarcocornia            | 0.22  | 0.11               | 0.07               | 0.16               | 0.12               | 0.13               | 0.09               | 0.13               | 0.15               |
| R41      | Sarcocornia            | 0.21  | 0.10               | 0.05               | 0.08               | 0.04               | 0.13               | 0.04               | 0.06               | 0.06               |
| R42      | Sarcocornia            | 0.2   | 0.13               | 0.09               | 0.12               | 0.10               | 0.16               | 0.11               | 0.08               | 0.13               |

|     |                        |      |      |      |      |      |      |      |      |      |
|-----|------------------------|------|------|------|------|------|------|------|------|------|
| R43 | Sarcocornia+Sporobolus | 0.34 | 0.08 | 0.03 | 0.06 | 0.09 | 0.12 | 0.03 | 0.08 | 0.10 |
| R44 | Sarcocornia            | 0.19 | 0.13 | 0.07 | 0.08 | 0.13 | 0.13 | 0.06 | 0.13 | 0.14 |
| R45 | Sarcocornia            | 0.29 | 0.15 | 0.08 | 0.12 | 0.08 | 0.11 | 0.08 | 0.08 | 0.08 |
| R46 | Salicornia             | 0.17 | 0.10 | 0.03 | 0.13 | 0.05 | 0.10 | 0.03 | 0.13 | 0.09 |
| R47 | Salicornia             | 0.18 | 0.09 | 0.04 | 0.14 | 0.10 | 0.08 | 0.04 | 0.14 | 0.13 |
| R48 | Salicornia             | 0.17 | 0.16 | 0.05 | 0.10 | 0.08 | 0.12 | 0.05 | 0.12 | 0.08 |
| R49 | Salicornia             | 0.14 | 0.11 | 0.03 | 0.08 | 0.11 | 0.14 | 0.04 | 0.11 | 0.11 |
| R50 | Salicornia             | 0.14 | 0.13 | 0.05 | 0.12 | 0.08 | 0.11 | 0.05 | 0.14 | 0.12 |
| R51 | Salicornia             | 0.15 | 1.09 | 0.08 | 0.20 | 0.11 | 0.19 | 0.11 | 0.13 | 0.12 |
| R52 | Salicornia             | 0.13 | 0.21 | 0.07 | 0.11 | 0.12 | 0.20 | 0.06 | 0.13 | 0.11 |
| R53 | Sarcocornia            | 0.25 | 0.16 | 0.07 | 0.24 | 0.12 | 0.14 | 0.07 | 0.13 | 0.15 |
| R54 | Sarcocornia            | 0.2  | 0.16 | 0.22 | 0.17 | 0.10 | 0.27 | 0.32 | 0.09 | 0.12 |
| R55 | Sarcocornia            | 0.29 | 0.22 | 0.10 | 0.19 | 0.12 | 0.18 | 0.10 | 0.10 | 0.15 |
| R56 | Sarcocornia            | 0.13 | 0.28 | 0.06 | 0.23 | 0.11 | 0.21 | 0.03 | 0.17 | 0.11 |

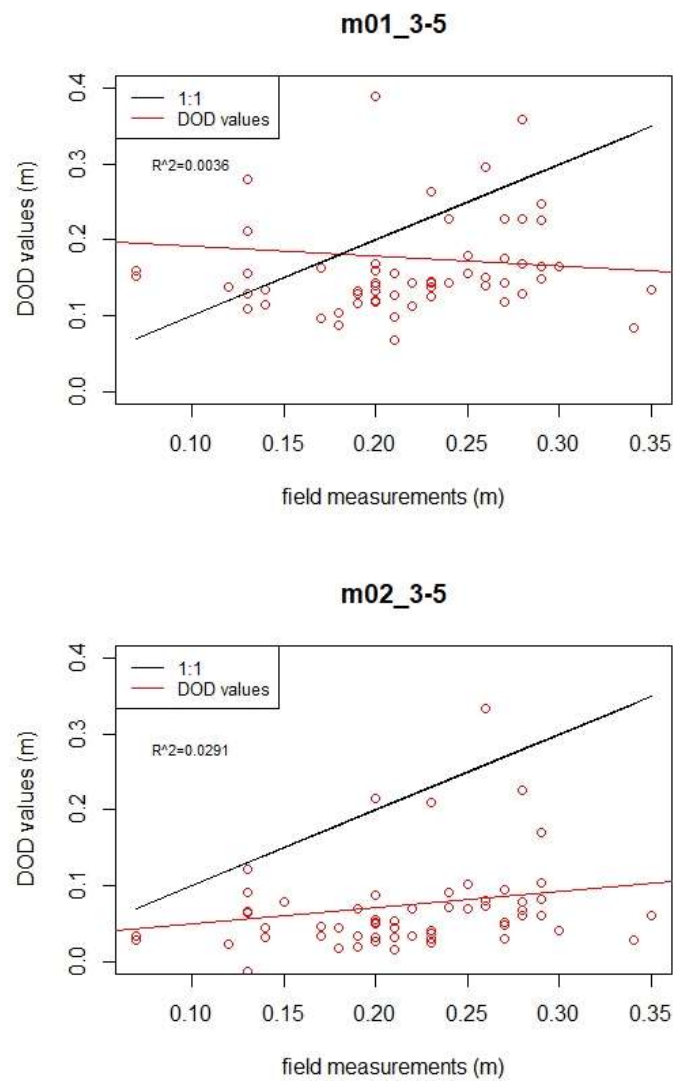

Figure S25. (Continue)

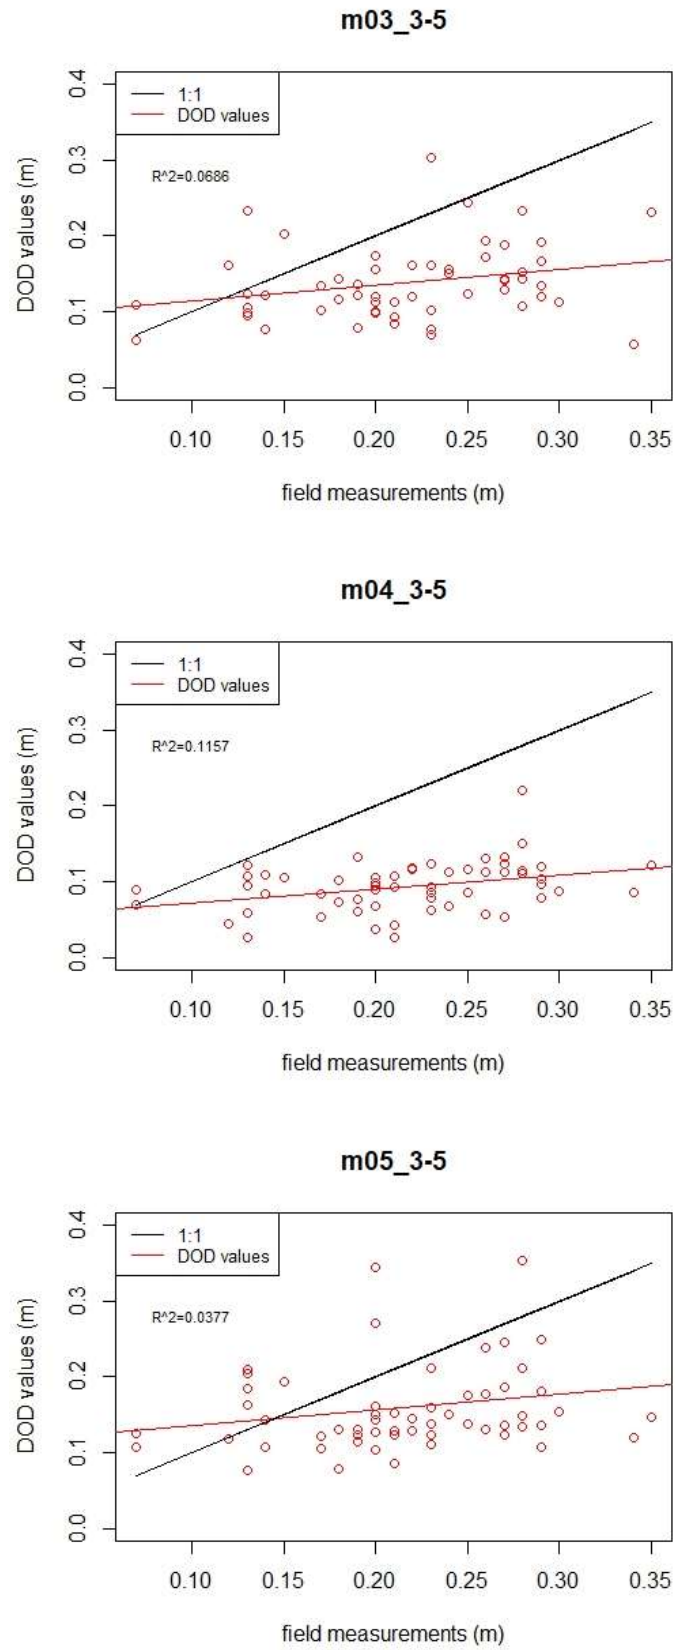

Figure S25. (Continue)

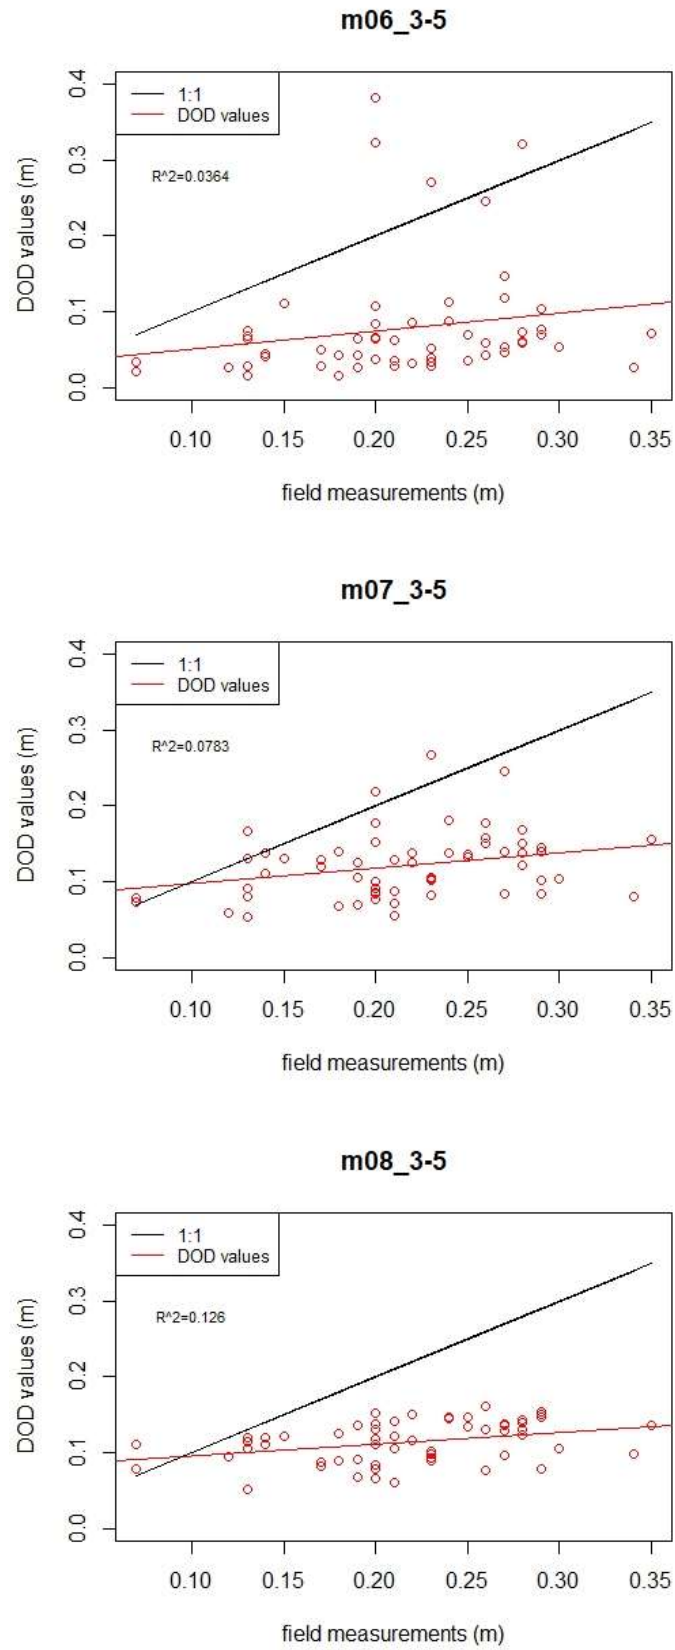

Figure S25. Linear regression and  $R^2$  value for  $DOD_{3-5}$  for all the eight missions compared to vegetation height values of GCPs. The red line is the regression line for the compared datasets, the black line represents the 1:1 pattern.

Table S70. Values of difference from field measurements for  $DOD_{3-5}$  for the eight missions at each point. Each column identifies the mission:  $m01_{3-5}$  represents data extracted from  $DOD_{3-5}$  of mission 1, and so on. Values expressed in meters. Negative values underestimate canopy height, positive values overestimate canopy height. The average RMSE defining the output for each mission is shown at the bottom of the respective column.

| Point Id | $m01_{3-5}$ | $m02_{3-5}$ | $m03_{3-5}$ | $m04_{3-5}$ | $m05_{3-5}$ | $m06_{3-5}$ | $m07_{3-5}$ | $m08_{3-5}$ |
|----------|-------------|-------------|-------------|-------------|-------------|-------------|-------------|-------------|
| C1       | 0.08        | -0.04       | -0.01       | 0.00        | -           | -           | -           | -           |
| C2       | 0.09        | -0.04       | 0.04        | 0.02        | -           | -           | -           | -           |
| C3       | 0.03        | -0.01       | -0.01       | -0.04       | -           | -           | -           | -           |
| C4       | 0.00        | -0.04       | -0.04       | -0.07       | -           | -           | -           | -           |
| R2       | -0.08       | -0.16       | -0.06       | -0.11       | -0.05       | -0.17       | -0.11       | -0.09       |
| R3       | -0.06       | -0.15       | -0.03       | -0.16       | -0.05       | -0.14       | -0.10       | -0.12       |
| R4       | -0.02       | -0.14       | -0.03       | -0.10       | -0.05       | -0.12       | -0.08       | -0.08       |
| R5       | 0.02        | -0.10       | 0.04        | -0.08       | 0.00        | -0.09       | -0.06       | -0.03       |
| R6       | -0.03       | -0.17       | -0.10       | -0.13       | -0.10       | -0.16       | -0.12       | -0.12       |
| R7       | -0.07       | -0.17       | -0.05       | -0.11       | -0.07       | -0.16       | -0.12       | -0.10       |
| R8       | -0.06       | -0.17       | -0.10       | -0.13       | -0.06       | -0.16       | -0.11       | -0.13       |
| R9       | -0.06       | -0.16       | -0.07       | -0.13       | -0.07       | -0.15       | -0.09       | -0.12       |
| R10      | -0.09       | -0.19       | -0.15       | -0.15       | -0.12       | -0.19       | -0.15       | -0.14       |
| R11      | 0.08        | -0.06       | -0.05       | -0.06       | 0.07        | 0.04        | -0.14       | -0.14       |
| R12      | -0.14       | -0.26       | -0.19       | -0.21       | -0.15       | -0.25       | -0.20       | -0.20       |
| R13      | -0.10       | -0.21       | -0.13       | -0.14       | -0.11       | -0.20       | -0.13       | -0.14       |
| R14      | -0.10       | -0.17       | -0.09       | -0.17       | -0.09       | -0.15       | -0.10       | -0.09       |
| R15      | -0.21       | -0.29       | -0.12       | -0.23       | -0.20       | -0.28       | -0.19       | -0.21       |
| R16      | -0.07       | -0.15       | -0.13       | -0.16       | -0.07       | -0.21       | -0.11       | -0.12       |
| R17      | 0.04        | 0.07        | -0.07       | -0.20       | -0.02       | -0.01       | -0.08       | -0.18       |
| R18      | -0.15       | -0.22       | -0.14       | -0.22       | -0.13       | -0.22       | -0.19       | -0.17       |
| R19      | -0.13       | -0.24       | -0.13       | -0.16       | -0.15       | -0.22       | -0.19       | -0.13       |
| R20      | -0.04       | -0.12       | -0.12       | -0.19       | -0.04       | -0.19       | -0.15       | -0.14       |
| R21      | -0.09       | -0.19       | -0.16       | -0.17       | -0.07       | -0.20       | -0.13       | -0.13       |
| R22      | -0.11       | -0.20       | -0.14       | -0.17       | -0.13       | -0.22       | -0.11       | -0.14       |
| R23      | -0.08       | -0.19       | -0.10       | -0.10       | -0.08       | -0.19       | -0.08       | -0.10       |
| R24      | -0.04       | -0.18       | -0.08       | -0.15       | -0.02       | -0.12       | -0.02       | -0.14       |
| R25      | -0.05       | -0.16       | -0.10       | -0.12       | -0.06       | -0.15       | -0.08       | -0.07       |
| R26      | 0.19        | 0.24        | -0.03       | -0.11       | 0.14        | 0.18        | 0.02        | -0.05       |
| R27      | -0.08       | -0.15       | -0.04       | -0.11       | -0.07       | -0.13       | -0.05       | -0.06       |
| R28      | 0.03        | -0.02       | 0.07        | -0.11       | -0.02       | 0.04        | 0.04        | -0.13       |
| R29      | -0.09       | -0.20       | -0.07       | -0.14       | -0.09       | -0.18       | -0.12       | -0.14       |
| R30      | -0.12       | -0.18       | -0.09       | -0.13       | -0.08       | -0.22       | -0.10       | -0.13       |
| R31      | -0.11       | -0.19       | -0.09       | -0.15       | -0.13       | -0.20       | -0.11       | -0.10       |
| R32      | -0.14       | -0.18       | -0.12       | -0.18       | -0.12       | -0.18       | -0.14       | -0.10       |
| R33      | -0.08       | -0.19       | -0.12       | -0.10       | -0.09       | -0.18       | -0.12       | -0.09       |
| R34      | -0.15       | -0.22       | -0.13       | -0.13       | -0.15       | -0.22       | -0.16       | -0.15       |
| R35      | -0.09       | -0.22       | -0.13       | -0.14       | -0.08       | -0.15       | -0.13       | -0.13       |
| R36      | -0.05       | -0.21       | -0.17       | -0.17       | -0.07       | -0.21       | -0.13       | -0.16       |
| R37      | -0.08       | -0.15       | -0.09       | -0.10       | -0.05       | -0.12       | -0.02       | -0.09       |
| R38      | -0.01       | -0.15       | -0.08       | -0.13       | 0.19        | -0.13       | -0.06       | -0.10       |
| R39      | -0.13       | -0.23       | -0.15       | -0.19       | -0.15       | -0.22       | -0.15       | -0.14       |
| R40      | -0.11       | -0.15       | -0.06       | -0.10       | -0.09       | -0.13       | -0.09       | -0.07       |
| R41      | -0.11       | -0.16       | -0.13       | -0.17       | -0.08       | -0.17       | -0.15       | -0.15       |
| R42      | -0.07       | -0.11       | -0.08       | -0.10       | -0.04       | -0.09       | -0.12       | -0.07       |
| R43      | -0.26       | -0.31       | -0.28       | -0.25       | -0.22       | -0.31       | -0.26       | -0.24       |
| R44      | -0.06       | -0.12       | -0.11       | -0.06       | -0.06       | -0.13       | -0.07       | -0.05       |
| R45      | -0.14       | -0.21       | -0.17       | -0.21       | -0.18       | -0.21       | -0.21       | -0.21       |
| R46      | -0.07       | -0.14       | -0.04       | -0.12       | -0.07       | -0.14       | -0.04       | -0.08       |
| R47      | -0.09       | -0.14       | -0.04       | -0.08       | -0.10       | -0.14       | -0.04       | -0.06       |
| R48      | -0.01       | -0.12       | -0.07       | -0.09       | -0.05       | -0.12       | -0.05       | -0.09       |
| R49      | -0.03       | -0.11       | -0.06       | -0.03       | 0.00        | -0.10       | -0.03       | -0.03       |
| R50      | -0.01       | -0.09       | -0.02       | -0.06       | -0.03       | -0.09       | 0.00        | -0.02       |
| R51      | 0.94        | -0.07       | 0.05        | -0.04       | 0.04        | -0.04       | -0.02       | -0.03       |
| R52      | 0.08        | -0.06       | -0.02       | -0.01       | 0.07        | -0.07       | 0.00        | -0.02       |

|          |       |       |       |       |       |       |       |       |
|----------|-------|-------|-------|-------|-------|-------|-------|-------|
| R53      | -0.09 | -0.18 | -0.01 | -0.13 | -0.11 | -0.18 | -0.12 | -0.10 |
| R54      | -0.04 | 0.02  | -0.03 | -0.10 | 0.07  | 0.12  | -0.11 | -0.08 |
| R55      | -0.07 | -0.19 | -0.10 | -0.17 | -0.11 | -0.19 | -0.19 | -0.14 |
| R56      | 0.15  | -0.07 | 0.10  | -0.02 | 0.08  | -0.10 | 0.04  | -0.02 |
| PROMEDIO | -0.05 | -0.15 | -0.08 | -0.13 | -0.06 | -0.14 | -0.10 | -0.11 |
| MEDIANA  | -0.07 | -0.16 | -0.09 | -0.13 | -0.07 | -0.16 | -0.11 | -0.12 |
| RMSE     | 0.156 | 0.167 | 0.103 | 0.136 | 0.100 | 0.169 | 0.119 | 0.121 |

Table S71. Field values of vegetation height measured at GCPs ('field' column) and values extracted from DOD<sub>3-10</sub> for the eight missions. For each point corresponding specie ('spp' column) is also reported. Each column identifies the mission: m01<sub>3-10</sub> represents data extracted from DOD<sub>3-10</sub> of mission 1, and so on. Values expressed in meters.

| Point Id | spp                    | field | m01 <sub>3-10</sub> | m02 <sub>3-10</sub> | m03 <sub>3-10</sub> | m04 <sub>3-10</sub> | m05 <sub>3-10</sub> | m06 <sub>3-10</sub> | m07 <sub>3-10</sub> | m08 <sub>3-10</sub> |
|----------|------------------------|-------|---------------------|---------------------|---------------------|---------------------|---------------------|---------------------|---------------------|---------------------|
| C1       | Salicornia             | 0.07  | 0.16                | 0.03                | 0.07                | 0.07                | -                   | -                   | -                   | -                   |
| C2       | Salicornia             | 0.07  | 0.16                | 0.04                | 0.10                | 0.09                | -                   | -                   | -                   | -                   |
| C3       | Salicornia             | 0.13  | 0.15                | 0.12                | 0.12                | 0.10                | -                   | -                   | -                   | -                   |
| C4       | Salicornia             | 0.13  | 0.12                | 0.09                | 0.10                | 0.06                | -                   | -                   | -                   | -                   |
| R2       | Salicornia             | 0.18  | 0.11                | 0.01                | 0.12                | 0.07                | 0.14                | 0.01                | 0.07                | 0.09                |
| R3       | Salicornia             | 0.20  | 0.14                | 0.05                | 0.15                | 0.04                | 0.15                | 0.06                | 0.13                | 0.08                |
| R4       | Salicornia             | 0.13  | 0.10                | -0.02               | 0.13                | 0.02                | 0.07                | 0.01                | 0.06                | 0.05                |
| R5       | Salicornia             | 0.12  | 0.13                | 0.02                | 0.13                | 0.05                | 0.12                | 0.02                | 0.05                | 0.09                |
| R6       | Salicornia             | 0.20  | 0.16                | 0.04                | 0.11                | 0.07                | 0.10                | 0.04                | 0.08                | 0.08                |
| R7       | Salicornia             | 0.19  | 0.12                | 0.02                | 0.09                | 0.08                | 0.12                | 0.02                | 0.07                | 0.09                |
| R8       | Salicornia             | 0.20  | 0.13                | 0.03                | 0.10                | 0.07                | 0.14                | 0.04                | 0.09                | 0.07                |
| R9       | Salicornia             | 0.19  | 0.14                | 0.04                | 0.11                | 0.06                | 0.12                | 0.05                | 0.10                | 0.07                |
| R10      | Salicornia             | 0.23  | 0.14                | 0.04                | 0.07                | 0.08                | 0.11                | 0.04                | 0.09                | 0.10                |
| R11      | Salicornia             | 0.28  | 0.26                | 0.07                | 0.22                | 0.15                | 0.31                | 0.20                | 0.15                | 0.13                |
| R12      | Salicornia             | 0.30  | 0.17                | 0.05                | 0.11                | 0.09                | 0.16                | 0.06                | 0.09                | 0.12                |
| R13      | Sarcocornia            | 0.23  | 0.12                | 0.02                | 0.08                | 0.08                | 0.13                | 0.03                | 0.07                | 0.09                |
| R14      | Sarcocornia            | 0.24  | 0.15                | 0.09                | 0.15                | 0.07                | 0.16                | 0.09                | 0.12                | 0.14                |
| R15      | Sarcocornia+Sporobolus | 0.35  | 0.14                | 0.06                | 0.22                | 0.12                | 0.15                | 0.08                | 0.16                | 0.14                |
| R16      | Sarcocornia            | 0.25  | 0.15                | 0.07                | 0.14                | 0.09                | 0.16                | 0.08                | 0.13                | 0.13                |
| R17      | Sarcocornia            | 0.26  | 0.18                | 0.25                | 0.23                | 0.06                | 0.15                | 0.12                | 0.18                | 0.10                |
| R18      | Sarcocornia            | 0.27  | 0.12                | 0.05                | 0.11                | 0.05                | 0.13                | 0.06                | 0.06                | 0.10                |
| R19      | Sarcocornia            | 0.27  | 0.15                | 0.04                | 0.16                | 0.12                | 0.13                | 0.05                | 0.09                | 0.14                |
| R20      | Sarcocornia            | 0.29  | 0.20                | 0.13                | 0.19                | 0.10                | 0.23                | 0.11                | 0.14                | 0.18                |
| R21      | Sarcocornia            | 0.23  | 0.15                | 0.04                | 0.08                | 0.07                | 0.17                | 0.04                | 0.10                | 0.10                |
| R22      | Sarcocornia            | 0.28  | 0.17                | 0.07                | 0.15                | 0.12                | 0.15                | 0.06                | 0.16                | 0.14                |
| R23      | Sarcocornia            | 0.22  | 0.14                | 0.03                | 0.13                | 0.12                | 0.14                | 0.03                | 0.13                | 0.12                |
| R24      | Sarcocornia            | 0.27  | 0.18                | 0.13                | 0.18                | 0.15                | 0.22                | 0.13                | 0.21                | 0.15                |
| R25      | Sarcocornia            | 0.21  | 0.16                | 0.06                | 0.13                | 0.10                | 0.15                | 0.07                | 0.12                | 0.14                |
| R26      | Sarcocornia            | 0.20  | 0.36                | 0.44                | 0.23                | 0.10                | 0.39                | 0.35                | 0.22                | 0.14                |
| R27      | Sarcocornia            | 0.20  | 0.12                | 0.06                | 0.16                | 0.09                | 0.14                | 0.06                | 0.16                | 0.14                |
| R28      | Sarcocornia            | 0.23  | 0.21                | 0.12                | 0.29                | 0.10                | 0.17                | 0.18                | 0.23                | 0.14                |
| R29      | Sarcocornia            | 0.23  | 0.14                | 0.04                | 0.14                | 0.09                | 0.13                | 0.05                | 0.09                | 0.10                |
| R30      | Sarcocornia            | 0.26  | 0.14                | 0.09                | 0.15                | 0.12                | 0.18                | 0.04                | 0.13                | 0.13                |
| R31      | Sarcocornia            | 0.26  | 0.15                | 0.06                | 0.17                | 0.11                | 0.14                | 0.06                | 0.14                | 0.16                |
| R32      | Sarcocornia            | 0.21  | 0.05                | 0.02                | 0.10                | 0.05                | 0.09                | 0.02                | 0.06                | 0.09                |
| R33      | Sarcocornia            | 0.21  | 0.12                | 0.01                | 0.09                | 0.11                | 0.12                | 0.03                | 0.09                | 0.12                |
| R34      | Sarcocornia            | 0.28  | 0.13                | 0.06                | 0.14                | 0.15                | 0.14                | 0.05                | 0.13                | 0.13                |
| R35      | Sarcocornia            | 0.27  | 0.20                | 0.10                | 0.14                | 0.14                | 0.19                | 0.12                | 0.14                | 0.16                |
| R36      | Sarcocornia            | 0.28  | 0.25                | 0.09                | 0.11                | 0.12                | 0.23                | 0.09                | 0.14                | 0.14                |
| R37      | Sarcocornia            | 0.20  | 0.12                | 0.04                | 0.10                | 0.11                | 0.16                | 0.07                | 0.17                | 0.10                |

|     |                        |      |      |      |      |      |      |      |      |      |
|-----|------------------------|------|------|------|------|------|------|------|------|------|
| R38 | Sarcocornia            | 0.24 | 0.21 | 0.10 | 0.26 | 0.12 | 0.38 | 0.15 | 0.22 | 0.13 |
| R39 | Sarcocornia            | 0.29 | 0.16 | 0.06 | 0.13 | 0.10 | 0.14 | 0.07 | 0.12 | 0.14 |
| R40 | Sarcocornia            | 0.22 | 0.11 | 0.07 | 0.16 | 0.11 | 0.14 | 0.09 | 0.14 | 0.16 |
| R41 | Sarcocornia            | 0.21 | 0.09 | 0.04 | 0.11 | 0.05 | 0.13 | 0.04 | 0.06 | 0.06 |
| R42 | Sarcocornia            | 0.20 | 0.13 | 0.10 | 0.10 | 0.10 | 0.16 | 0.12 | 0.09 | 0.14 |
| R43 | Sarcocornia+Sporobolus | 0.34 | 0.07 | 0.04 | 0.07 | 0.09 | 0.11 | 0.04 | 0.05 | 0.10 |
| R44 | Sarcocornia            | 0.19 | 0.12 | 0.07 | 0.08 | 0.13 | 0.13 | 0.07 | 0.12 | 0.13 |
| R45 | Sarcocornia            | 0.29 | 0.16 | 0.10 | 0.12 | 0.08 | 0.12 | 0.08 | 0.09 | 0.09 |
| R46 | Salicornia             | 0.17 | 0.10 | 0.03 | 0.15 | 0.05 | 0.11 | 0.03 | 0.11 | 0.09 |
| R47 | Salicornia             | 0.18 | 0.09 | 0.05 | 0.14 | 0.10 | 0.08 | 0.05 | 0.14 | 0.12 |
| R48 | Salicornia             | 0.17 | 0.17 | 0.05 | 0.13 | 0.09 | 0.13 | 0.05 | 0.11 | 0.08 |
| R49 | Salicornia             | 0.14 | 0.15 | 0.04 | 0.09 | 0.10 | 0.13 | 0.05 | 0.09 | 0.12 |
| R50 | Salicornia             | 0.14 | 0.13 | 0.05 | 0.12 | 0.09 | 0.11 | 0.05 | 0.13 | 0.11 |
| R51 | Salicornia             | 0.15 | 1.10 | 0.09 | 0.18 | 0.10 | 0.19 | 0.11 | 0.14 | 0.13 |
| R52 | Salicornia             | 0.13 | 0.20 | 0.08 | 0.12 | 0.12 | 0.20 | 0.07 | 0.13 | 0.12 |
| R53 | Sarcocornia            | 0.25 | 0.15 | 0.07 | 0.24 | 0.12 | 0.13 | 0.08 | 0.13 | 0.15 |
| R54 | Sarcocornia            | 0.20 | 0.16 | 0.18 | 0.19 | 0.11 | 0.28 | 0.26 | 0.10 | 0.13 |
| R55 | Sarcocornia            | 0.29 | 0.22 | 0.10 | 0.18 | 0.12 | 0.17 | 0.08 | 0.13 | 0.15 |
| R56 | Sarcocornia            | 0.13 | 0.25 | 0.05 | 0.22 | 0.11 | 0.22 | 0.08 | 0.16 | 0.12 |

**m01\_3-10**

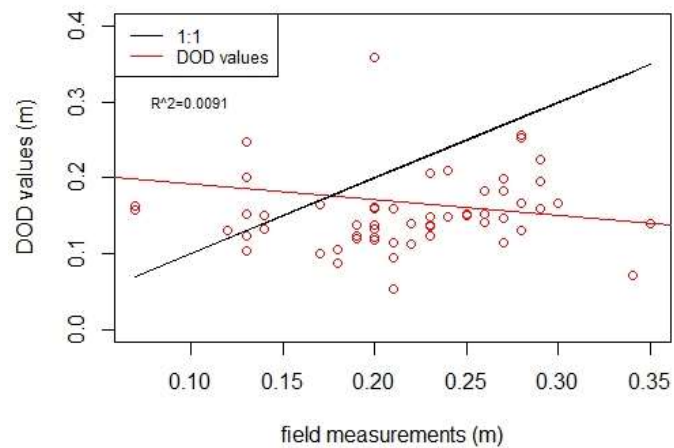

**m02\_3-10**

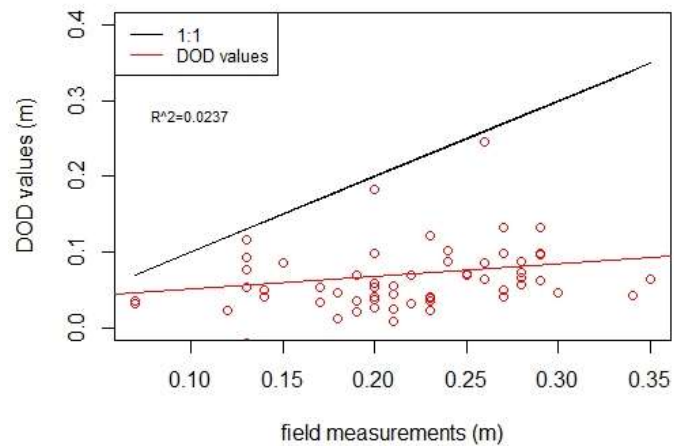

Figure S26. (Continue)

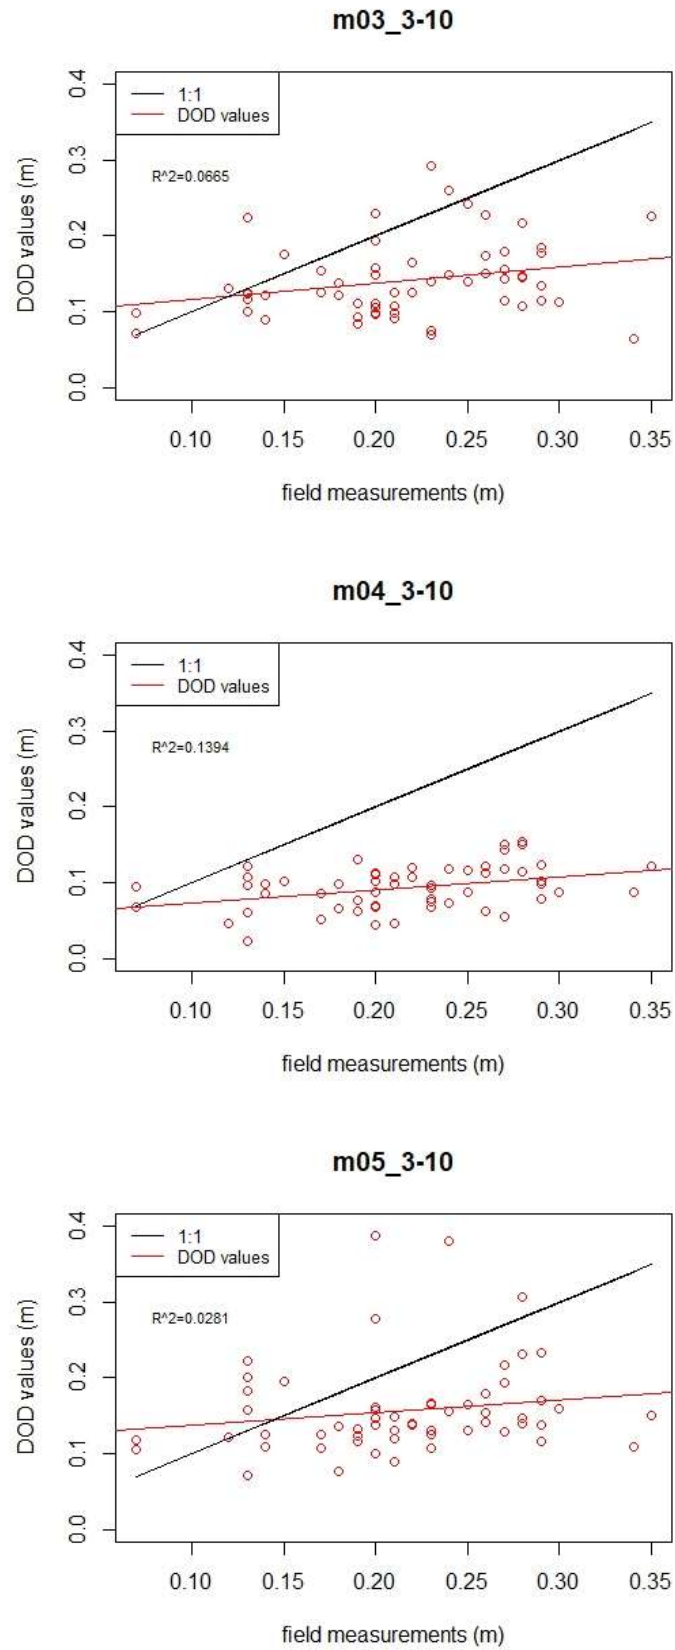

Figure S26. (Continue)

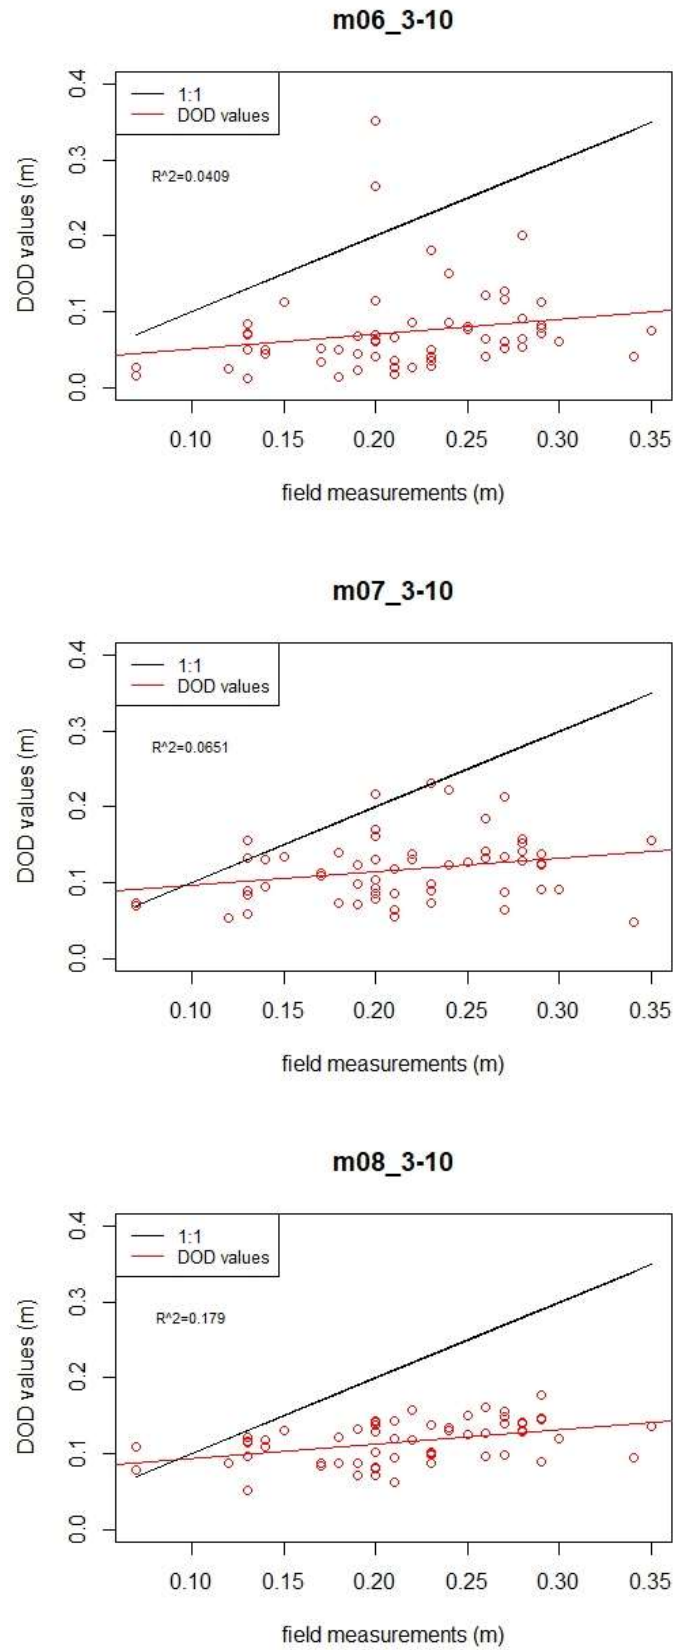

Figure S26. Linear regression and  $R^2$  value for  $DOD_{3-10}$  for all the eight missions compared to vegetation height values of GCPs. The red line is the regression line for the compared datasets, the black line represents the 1:1 pattern.

Table S72. Values of difference from field measurements for  $DOD_{3-10}$  for the eight missions at each point. Each column identifies the mission:  $m01_{3-10}$  represents data extracted from  $DOD_{3-10}$  of mission 1, and so on. Values expressed in meters. Negative values underestimate canopy height, positive values overestimate canopy height. The average RMSE defining the output for each mission is shown at the bottom of the respective column.

| Point Id | $m01_{3-10}$ | $m02_{3-10}$ | $m03_{3-10}$ | $m04_{3-10}$ | $m05_{3-10}$ | $m06_{3-10}$ | $m07_{3-10}$ | $m08_{3-10}$ |
|----------|--------------|--------------|--------------|--------------|--------------|--------------|--------------|--------------|
| C1       | 0.09         | -0.04        | 0.00         | 0.00         | -            | -            | -            | -            |
| C2       | 0.09         | -0.03        | 0.03         | 0.02         | -            | -            | -            | -            |
| C3       | 0.02         | -0.01        | -0.01        | -0.03        | -            | -            | -            | -            |
| C4       | -0.01        | -0.04        | -0.03        | -0.07        | -            | -            | -            | -            |
| R2       | -0.07        | -0.17        | -0.06        | -0.11        | -0.04        | -0.17        | -0.11        | -0.09        |
| R3       | -0.06        | -0.15        | -0.05        | -0.16        | -0.05        | -0.14        | -0.07        | -0.12        |
| R4       | -0.03        | -0.15        | -0.01        | -0.11        | -0.06        | -0.12        | -0.07        | -0.08        |
| R5       | 0.01         | -0.10        | 0.01         | -0.07        | 0.00         | -0.10        | -0.07        | -0.03        |
| R6       | -0.04        | -0.16        | -0.09        | -0.13        | -0.10        | -0.16        | -0.12        | -0.12        |
| R7       | -0.07        | -0.17        | -0.10        | -0.11        | -0.07        | -0.17        | -0.12        | -0.10        |
| R8       | -0.07        | -0.17        | -0.10        | -0.13        | -0.06        | -0.16        | -0.11        | -0.13        |
| R9       | -0.05        | -0.15        | -0.08        | -0.13        | -0.07        | -0.14        | -0.09        | -0.12        |
| R10      | -0.09        | -0.19        | -0.16        | -0.15        | -0.12        | -0.19        | -0.14        | -0.13        |
| R11      | -0.02        | -0.21        | -0.06        | -0.13        | 0.03         | -0.08        | -0.13        | -0.15        |
| R12      | -0.13        | -0.25        | -0.19        | -0.21        | -0.14        | -0.24        | -0.21        | -0.18        |
| R13      | -0.11        | -0.21        | -0.15        | -0.15        | -0.11        | -0.20        | -0.16        | -0.14        |
| R14      | -0.09        | -0.15        | -0.09        | -0.17        | -0.08        | -0.15        | -0.12        | -0.10        |
| R15      | -0.21        | -0.29        | -0.13        | -0.23        | -0.20        | -0.27        | -0.19        | -0.21        |
| R16      | -0.10        | -0.18        | -0.11        | -0.16        | -0.09        | -0.17        | -0.12        | -0.12        |
| R17      | -0.08        | -0.01        | -0.03        | -0.20        | -0.11        | -0.14        | -0.08        | -0.16        |
| R18      | -0.15        | -0.22        | -0.16        | -0.22        | -0.14        | -0.21        | -0.21        | -0.17        |
| R19      | -0.12        | -0.23        | -0.11        | -0.15        | -0.14        | -0.22        | -0.18        | -0.13        |
| R20      | -0.09        | -0.16        | -0.10        | -0.19        | -0.06        | -0.18        | -0.15        | -0.11        |
| R21      | -0.08        | -0.19        | -0.15        | -0.16        | -0.06        | -0.19        | -0.13        | -0.13        |
| R22      | -0.11        | -0.21        | -0.13        | -0.16        | -0.13        | -0.22        | -0.12        | -0.14        |
| R23      | -0.08        | -0.19        | -0.09        | -0.10        | -0.08        | -0.19        | -0.09        | -0.10        |
| R24      | -0.09        | -0.14        | -0.09        | -0.12        | -0.05        | -0.14        | -0.06        | -0.12        |
| R25      | -0.05        | -0.15        | -0.09        | -0.11        | -0.06        | -0.14        | -0.09        | -0.07        |
| R26      | 0.16         | 0.24         | 0.03         | -0.10        | 0.19         | 0.15         | 0.02         | -0.06        |
| R27      | -0.08        | -0.14        | -0.04        | -0.11        | -0.06        | -0.14        | -0.04        | -0.06        |
| R28      | -0.02        | -0.11        | 0.06         | -0.13        | -0.06        | -0.05        | 0.00         | -0.09        |
| R29      | -0.09        | -0.19        | -0.09        | -0.14        | -0.10        | -0.18        | -0.14        | -0.13        |
| R30      | -0.12        | -0.17        | -0.11        | -0.14        | -0.08        | -0.22        | -0.13        | -0.13        |
| R31      | -0.11        | -0.20        | -0.09        | -0.15        | -0.12        | -0.20        | -0.12        | -0.10        |
| R32      | -0.16        | -0.19        | -0.11        | -0.16        | -0.12        | -0.19        | -0.15        | -0.12        |
| R33      | -0.09        | -0.20        | -0.12        | -0.10        | -0.09        | -0.18        | -0.12        | -0.09        |
| R34      | -0.15        | -0.22        | -0.14        | -0.13        | -0.14        | -0.23        | -0.15        | -0.15        |
| R35      | -0.07        | -0.17        | -0.13        | -0.13        | -0.08        | -0.15        | -0.13        | -0.11        |
| R36      | -0.03        | -0.19        | -0.17        | -0.16        | -0.05        | -0.19        | -0.14        | -0.14        |
| R37      | -0.08        | -0.16        | -0.10        | -0.09        | -0.04        | -0.13        | -0.03        | -0.10        |
| R38      | -0.03        | -0.14        | 0.02         | -0.12        | 0.14         | -0.09        | -0.02        | -0.11        |
| R39      | -0.13        | -0.23        | -0.16        | -0.19        | -0.15        | -0.22        | -0.17        | -0.15        |
| R40      | -0.11        | -0.15        | -0.06        | -0.11        | -0.08        | -0.13        | -0.08        | -0.06        |
| R41      | -0.12        | -0.17        | -0.10        | -0.16        | -0.08        | -0.17        | -0.15        | -0.15        |
| R42      | -0.07        | -0.10        | -0.10        | -0.10        | -0.04        | -0.08        | -0.11        | -0.06        |
| R43      | -0.27        | -0.30        | -0.28        | -0.25        | -0.23        | -0.30        | -0.29        | -0.25        |
| R44      | -0.07        | -0.12        | -0.11        | -0.06        | -0.06        | -0.12        | -0.07        | -0.06        |
| R45      | -0.13        | -0.19        | -0.17        | -0.21        | -0.17        | -0.21        | -0.20        | -0.20        |
| R46      | -0.07        | -0.14        | -0.02        | -0.12        | -0.06        | -0.14        | -0.06        | -0.08        |
| R47      | -0.09        | -0.13        | -0.04        | -0.08        | -0.10        | -0.13        | -0.04        | -0.06        |
| R48      | 0.00         | -0.12        | -0.05        | -0.08        | -0.05        | -0.12        | -0.06        | -0.09        |
| R49      | 0.01         | -0.10        | -0.05        | -0.04        | -0.01        | -0.09        | -0.05        | -0.02        |
| R50      | -0.01        | -0.09        | -0.02        | -0.05        | -0.03        | -0.09        | -0.01        | -0.03        |
| R51      | 0.95         | -0.06        | 0.03         | -0.05        | 0.04         | -0.04        | -0.01        | -0.02        |
| R52      | 0.07         | -0.05        | -0.01        | -0.01        | 0.07         | -0.06        | 0.00         | -0.01        |

|          |       |       |       |       |       |       |       |       |
|----------|-------|-------|-------|-------|-------|-------|-------|-------|
| R53      | -0.10 | -0.18 | -0.01 | -0.13 | -0.12 | -0.17 | -0.12 | -0.10 |
| R54      | -0.04 | -0.02 | -0.01 | -0.09 | 0.08  | 0.06  | -0.10 | -0.07 |
| R55      | -0.07 | -0.19 | -0.11 | -0.17 | -0.12 | -0.21 | -0.16 | -0.14 |
| R56      | 0.12  | -0.08 | 0.09  | -0.02 | 0.09  | -0.05 | 0.03  | -0.01 |
| PROMEDIO | -0.05 | -0.15 | -0.08 | -0.13 | -0.07 | -0.15 | -0.10 | -0.11 |
| MEDIANA  | -0.08 | -0.17 | -0.09 | -0.13 | -0.07 | -0.16 | -0.12 | -0.11 |
| RMSE     | 0.158 | 0.167 | 0.102 | 0.135 | 0.101 | 0.166 | 0.122 | 0.118 |

Table S73. Field values of vegetation height measured at GCPs ('field' column) and values extracted from DOD<sub>3-15</sub> for the eight missions. For each point corresponding specie ('spp' column) is also reported. Each column identifies the mission: m01<sub>3-15</sub> represents data extracted from DOD<sub>3-15</sub> of mission 1, and so on. Values expressed in meters.

| Point Id | spp                    | field | m01 <sub>3-15</sub> | m02 <sub>3-15</sub> | m03 <sub>3-15</sub> | m04 <sub>3-15</sub> | m05 <sub>3-15</sub> | m06 <sub>3-15</sub> | m07 <sub>3-15</sub> | m08 <sub>3-15</sub> |
|----------|------------------------|-------|---------------------|---------------------|---------------------|---------------------|---------------------|---------------------|---------------------|---------------------|
| C1       | Salicornia             | 0.07  | 0.15                | 0.03                | 0.07                | 0.07                | -                   | -                   | -                   | -                   |
| C2       | Salicornia             | 0.07  | 0.16                | 0.04                | 0.10                | 0.09                | -                   | -                   | -                   | -                   |
| C3       | Salicornia             | 0.13  | 0.16                | 0.12                | 0.12                | 0.10                | -                   | -                   | -                   | -                   |
| C4       | Salicornia             | 0.13  | 0.12                | 0.09                | 0.10                | 0.06                | -                   | -                   | -                   | -                   |
| R2       | Salicornia             | 0.18  | 0.10                | 0.01                | 0.11                | 0.07                | 0.13                | 0.01                | 0.07                | 0.09                |
| R3       | Salicornia             | 0.2   | 0.14                | 0.05                | 0.16                | 0.05                | 0.15                | 0.07                | 0.14                | 0.08                |
| R4       | Salicornia             | 0.13  | 0.10                | -0.02               | 0.12                | 0.02                | 0.07                | 0.01                | 0.06                | 0.05                |
| R5       | Salicornia             | 0.12  | 0.13                | 0.02                | 0.13                | 0.04                | 0.12                | 0.02                | 0.05                | 0.09                |
| R6       | Salicornia             | 0.2   | 0.16                | 0.04                | 0.11                | 0.07                | 0.10                | 0.04                | 0.08                | 0.09                |
| R7       | Salicornia             | 0.19  | 0.12                | 0.02                | 0.10                | 0.08                | 0.11                | 0.03                | 0.07                | 0.09                |
| R8       | Salicornia             | 0.2   | 0.12                | 0.03                | 0.10                | 0.07                | 0.13                | 0.04                | 0.10                | 0.07                |
| R9       | Salicornia             | 0.19  | 0.14                | 0.04                | 0.11                | 0.06                | 0.12                | 0.05                | 0.10                | 0.07                |
| R10      | Salicornia             | 0.23  | 0.14                | 0.04                | 0.07                | 0.07                | 0.11                | 0.05                | 0.09                | 0.10                |
| R11      | Salicornia             | 0.28  | 0.32                | 0.10                | 0.22                | 0.18                | 0.12                | 0.17                | 0.16                | 0.17                |
| R12      | Salicornia             | 0.3   | 0.16                | 0.05                | 0.11                | 0.09                | 0.16                | 0.06                | 0.08                | 0.11                |
| R13      | Sarcocornia            | 0.23  | 0.12                | 0.02                | 0.08                | 0.08                | 0.12                | 0.03                | 0.06                | 0.09                |
| R14      | Sarcocornia            | 0.24  | 0.15                | 0.08                | 0.13                | 0.07                | 0.16                | 0.09                | 0.12                | 0.12                |
| R15      | Sarcocornia+Sporobolus | 0.35  | 0.14                | 0.06                | 0.22                | 0.12                | 0.15                | 0.08                | 0.15                | 0.14                |
| R16      | Sarcocornia            | 0.25  | 0.18                | 0.12                | 0.15                | 0.10                | 0.16                | 0.07                | 0.14                | 0.14                |
| R17      | Sarcocornia            | 0.26  | 0.18                | 0.29                | 0.22                | 0.07                | 0.15                | 0.30                | 0.22                | 0.10                |
| R18      | Sarcocornia            | 0.27  | 0.12                | 0.05                | 0.11                | 0.06                | 0.12                | 0.06                | 0.06                | 0.09                |
| R19      | Sarcocornia            | 0.27  | 0.14                | 0.04                | 0.16                | 0.12                | 0.11                | 0.05                | 0.11                | 0.14                |
| R20      | Sarcocornia            | 0.29  | 0.22                | 0.15                | 0.20                | 0.12                | 0.23                | 0.10                | 0.14                | 0.16                |

|     |                        |          |      |      |      |      |      |      |      |      |
|-----|------------------------|----------|------|------|------|------|------|------|------|------|
| R21 | Sarcocornia            | 0.2<br>3 | 0.16 | 0.04 | 0.07 | 0.07 | 0.15 | 0.04 | 0.10 | 0.10 |
| R22 | Sarcocornia            | 0.2<br>8 | 0.18 | 0.06 | 0.14 | 0.11 | 0.14 | 0.07 | 0.15 | 0.14 |
| R23 | Sarcocornia            | 0.2<br>2 | 0.14 | 0.03 | 0.12 | 0.12 | 0.14 | 0.03 | 0.13 | 0.12 |
| R24 | Sarcocornia            | 0.2<br>7 | 0.17 | 0.07 | 0.20 | 0.12 | 0.21 | 0.12 | 0.21 | 0.14 |
| R25 | Sarcocornia            | 0.2<br>1 | 0.16 | 0.05 | 0.13 | 0.09 | 0.15 | 0.06 | 0.11 | 0.15 |
| R26 | Sarcocornia            | 0.2      | 0.36 | 0.40 | 0.19 | 0.14 | 0.39 | 0.08 | 0.26 | 0.14 |
| R27 | Sarcocornia            | 0.2      | 0.12 | 0.05 | 0.16 | 0.09 | 0.14 | 0.05 | 0.16 | 0.14 |
| R28 | Sarcocornia            | 0.2<br>3 | 0.15 | 0.12 | 0.29 | 0.22 | 0.15 | 0.19 | 0.26 | 0.10 |
| R29 | Sarcocornia            | 0.2<br>3 | 0.16 | 0.08 | 0.15 | 0.09 | 0.12 | 0.05 | 0.08 | 0.10 |
| R30 | Sarcocornia            | 0.2<br>6 | 0.14 | 0.08 | 0.16 | 0.12 | 0.17 | 0.04 | 0.12 | 0.13 |
| R31 | Sarcocornia            | 0.2<br>6 | 0.16 | 0.06 | 0.16 | 0.11 | 0.14 | 0.06 | 0.11 | 0.16 |
| R32 | Sarcocornia            | 0.2<br>1 | 0.05 | 0.02 | 0.08 | 0.05 | 0.06 | 0.02 | 0.06 | 0.09 |
| R33 | Sarcocornia            | 0.2<br>1 | 0.12 | 0.01 | 0.10 | 0.11 | 0.12 | 0.03 | 0.09 | 0.12 |
| R34 | Sarcocornia            | 0.2<br>8 | 0.13 | 0.06 | 0.13 | 0.15 | 0.14 | 0.06 | 0.13 | 0.13 |
| R35 | Sarcocornia            | 0.2<br>7 | 0.21 | 0.09 | 0.14 | 0.13 | 0.20 | 0.12 | 0.14 | 0.15 |
| R36 | Sarcocornia            | 0.2<br>8 | 0.24 | 0.06 | 0.11 | 0.11 | 0.23 | 0.11 | 0.14 | 0.14 |
| R37 | Sarcocornia            | 0.2      | 0.12 | 0.06 | 0.10 | 0.11 | 0.16 | 0.07 | 0.16 | 0.10 |
| R38 | Sarcocornia            | 0.2<br>4 | 0.30 | 0.11 | 0.17 | 0.13 | 0.25 | 0.15 | 0.20 | 0.14 |
| R39 | Sarcocornia            | 0.2<br>9 | 0.17 | 0.07 | 0.12 | 0.10 | 0.14 | 0.07 | 0.11 | 0.15 |
| R40 | Sarcocornia            | 0.2<br>2 | 0.11 | 0.06 | 0.16 | 0.11 | 0.14 | 0.09 | 0.13 | 0.16 |
| R41 | Sarcocornia            | 0.2<br>1 | 0.10 | 0.05 | 0.11 | 0.05 | 0.13 | 0.04 | 0.06 | 0.06 |
| R42 | Sarcocornia            | 0.2      | 0.13 | 0.10 | 0.10 | 0.10 | 0.17 | 0.11 | 0.10 | 0.14 |
| R43 | Sarcocornia+Sporobolus | 0.3<br>4 | 0.10 | 0.03 | 0.06 | 0.08 | 0.09 | 0.02 | 0.08 | 0.10 |
| R44 | Sarcocornia            | 0.1<br>9 | 0.13 | 0.07 | 0.09 | 0.13 | 0.13 | 0.07 | 0.13 | 0.13 |
| R45 | Sarcocornia            | 0.2<br>9 | 0.16 | 0.11 | 0.13 | 0.08 | 0.12 | 0.08 | 0.09 | 0.09 |
| R46 | Salicornia             | 0.1<br>7 | 0.10 | 0.04 | 0.16 | 0.05 | 0.11 | 0.04 | 0.12 | 0.09 |
| R47 | Salicornia             | 0.1<br>8 | 0.09 | 0.05 | 0.15 | 0.10 | 0.08 | 0.05 | 0.13 | 0.12 |
| R48 | Salicornia             | 0.1<br>7 | 0.17 | 0.05 | 0.14 | 0.08 | 0.13 | 0.05 | 0.11 | 0.08 |
| R49 | Salicornia             | 0.1<br>4 | 0.12 | 0.04 | 0.09 | 0.11 | 0.13 | 0.05 | 0.09 | 0.12 |
| R50 | Salicornia             | 0.1<br>4 | 0.14 | 0.05 | 0.13 | 0.09 | 0.12 | 0.05 | 0.14 | 0.11 |

|     |             |      |      |      |      |      |      |      |      |      |
|-----|-------------|------|------|------|------|------|------|------|------|------|
| R51 | Salicornia  | 0.15 | 1.10 | 0.10 | 0.17 | 0.11 | 0.20 | 0.10 | 0.14 | 0.14 |
| R52 | Salicornia  | 0.13 | 0.19 | 0.08 | 0.12 | 0.12 | 0.19 | 0.07 | 0.13 | 0.13 |
| R53 | Sarcocornia | 0.25 | 0.16 | 0.08 | 0.22 | 0.12 | 0.14 | 0.08 | 0.13 | 0.15 |
| R54 | Sarcocornia | 0.2  | 0.17 | 0.18 | 0.20 | 0.11 | 0.30 | 0.19 | 0.11 | 0.13 |
| R55 | Sarcocornia | 0.29 | 0.23 | 0.12 | 0.18 | 0.12 | 0.19 | 0.09 | 0.12 | 0.15 |
| R56 | Sarcocornia | 0.13 | 0.25 | 0.00 | 0.20 | 0.10 | 0.22 | 0.10 | 0.16 | 0.10 |

**m01\_3-15**

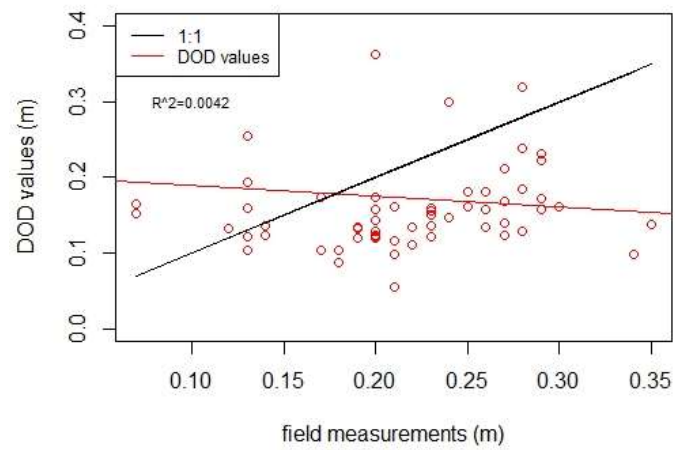

**m02\_3-15**

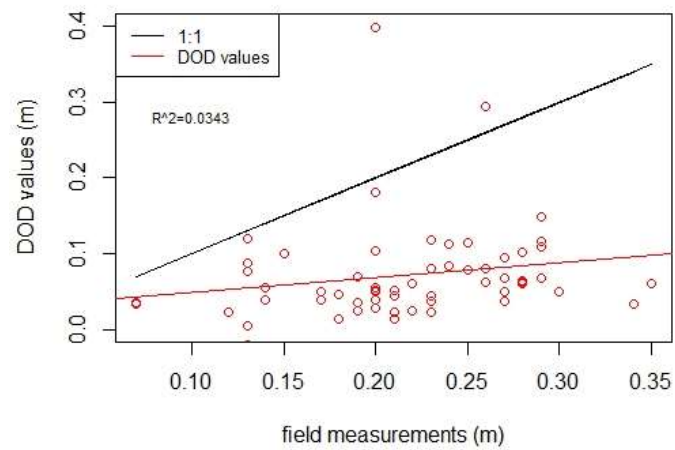

Figure S27. (Continue)

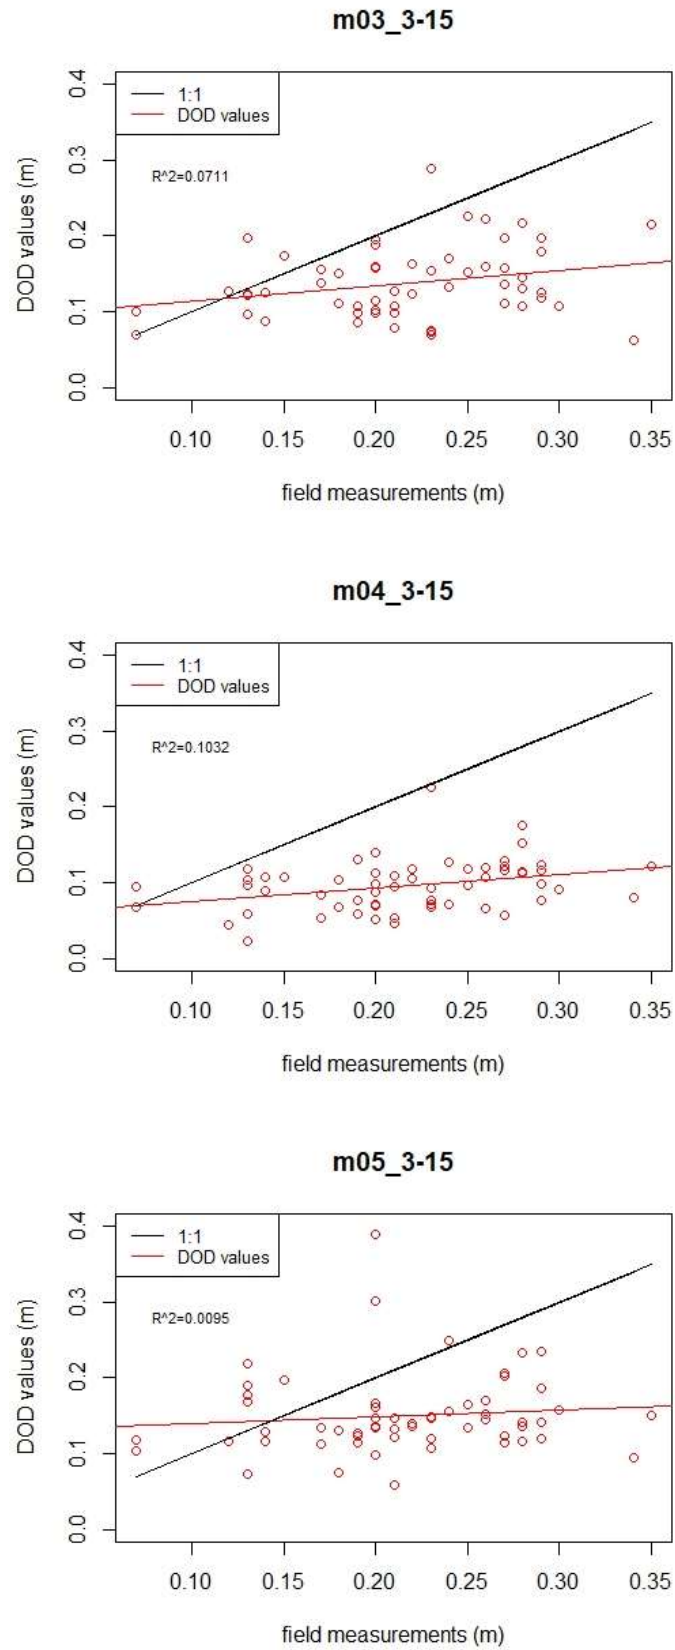

Figure S27. (Continue)

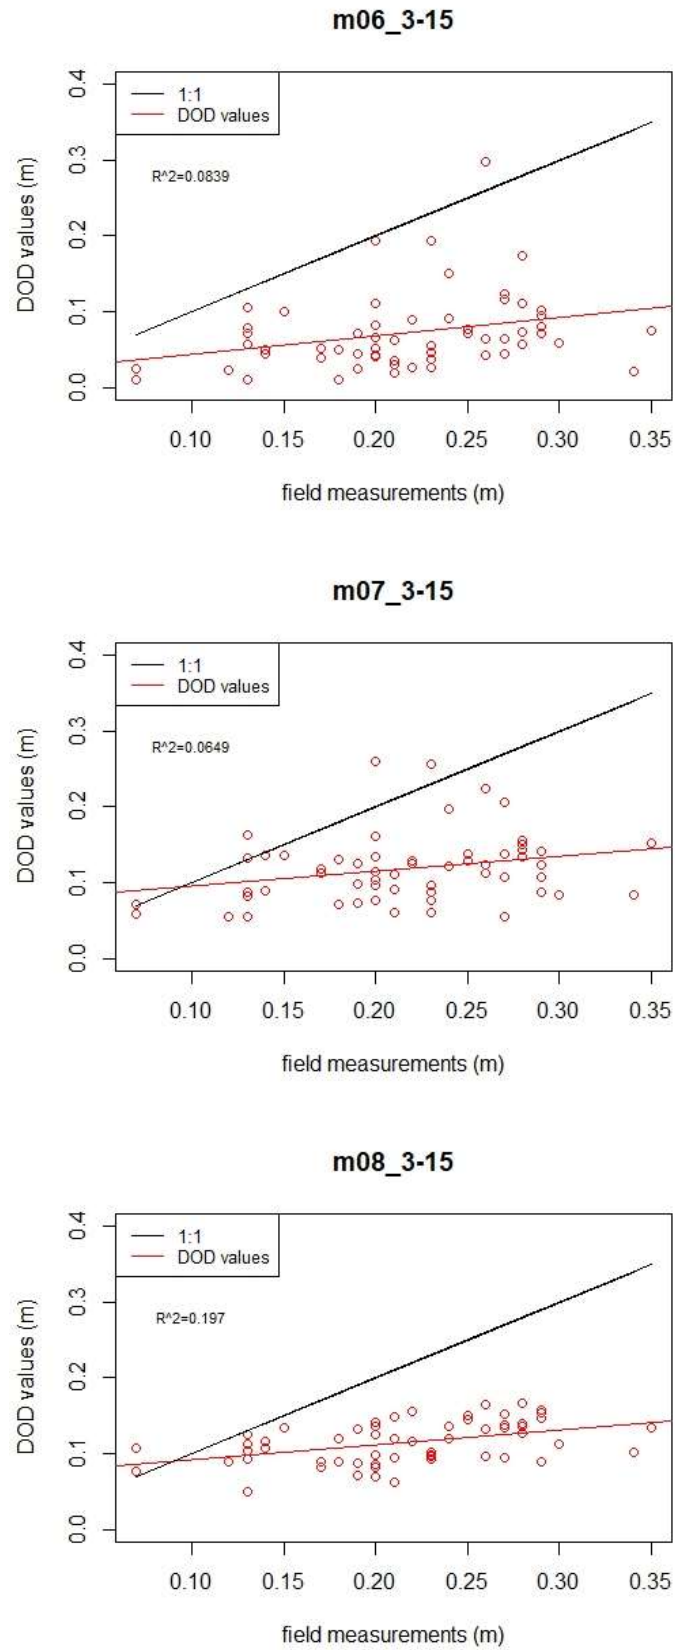

Figure S27. Linear regression and  $R^2$  value for  $DOD_{3-15}$  for all the eight missions compared to vegetation height values of GCPs. The red line is the regression line for the compared datasets, the black line represents the 1:1 pattern.

Table S74. Values of difference from field measurements for  $DOD_{3-15}$  for the eight missions at each point. Each column identifies the mission:  $m01_{3-15}$  represents data extracted from  $DOD_{3-15}$  of mission 1, and so on. Values expressed in meters. Negative values underestimate canopy height, positive values overestimate canopy height. The average RMSE defining the output for each mission is shown at the bottom of the respective column.

| Point Id | $m01_{3-15}$ | $m02_{3-15}$ | $m03_{3-15}$ | $m04_{3-15}$ | $m05_{3-15}$ | $m06_{3-15}$ | $m07_{3-15}$ | $m08_{3-15}$ |
|----------|--------------|--------------|--------------|--------------|--------------|--------------|--------------|--------------|
| C1       | 0.08         | -0.04        | 0.00         | 0.00         | -            | -            | -            | -            |
| C2       | 0.09         | -0.03        | 0.03         | 0.02         | -            | -            | -            | -            |
| C3       | 0.03         | -0.01        | -0.01        | -0.03        | -            | -            | -            | -            |
| C4       | -0.01        | -0.04        | -0.03        | -0.07        | -            | -            | -            | -            |
| R2       | -0.08        | -0.17        | -0.07        | -0.11        | -0.05        | -0.17        | -0.11        | -0.09        |
| R3       | -0.06        | -0.15        | -0.04        | -0.15        | -0.05        | -0.13        | -0.06        | -0.12        |
| R4       | -0.03        | -0.15        | -0.01        | -0.11        | -0.06        | -0.12        | -0.07        | -0.08        |
| R5       | 0.01         | -0.10        | 0.01         | -0.08        | 0.00         | -0.10        | -0.07        | -0.03        |
| R6       | -0.04        | -0.16        | -0.09        | -0.13        | -0.10        | -0.16        | -0.12        | -0.11        |
| R7       | -0.07        | -0.17        | -0.09        | -0.11        | -0.08        | -0.16        | -0.12        | -0.10        |
| R8       | -0.08        | -0.17        | -0.10        | -0.13        | -0.07        | -0.16        | -0.10        | -0.13        |
| R9       | -0.05        | -0.15        | -0.08        | -0.13        | -0.07        | -0.14        | -0.09        | -0.12        |
| R10      | -0.09        | -0.19        | -0.16        | -0.16        | -0.12        | -0.18        | -0.14        | -0.13        |
| R11      | 0.04         | -0.18        | -0.06        | -0.10        | -0.16        | -0.11        | -0.12        | -0.11        |
| R12      | -0.14        | -0.25        | -0.19        | -0.21        | -0.14        | -0.24        | -0.22        | -0.19        |
| R13      | -0.11        | -0.21        | -0.15        | -0.15        | -0.11        | -0.20        | -0.17        | -0.14        |
| R14      | -0.09        | -0.16        | -0.11        | -0.17        | -0.08        | -0.15        | -0.12        | -0.12        |
| R15      | -0.21        | -0.29        | -0.13        | -0.23        | -0.20        | -0.27        | -0.20        | -0.21        |
| R16      | -0.07        | -0.13        | -0.10        | -0.15        | -0.09        | -0.18        | -0.11        | -0.11        |
| R17      | -0.08        | 0.03         | -0.04        | -0.19        | -0.11        | 0.04         | -0.04        | -0.16        |
| R18      | -0.15        | -0.22        | -0.16        | -0.21        | -0.15        | -0.21        | -0.21        | -0.18        |
| R19      | -0.13        | -0.23        | -0.11        | -0.15        | -0.16        | -0.22        | -0.16        | -0.13        |
| R20      | -0.07        | -0.14        | -0.09        | -0.17        | -0.06        | -0.19        | -0.15        | -0.13        |
| R21      | -0.07        | -0.19        | -0.16        | -0.16        | -0.08        | -0.19        | -0.13        | -0.13        |
| R22      | -0.10        | -0.22        | -0.14        | -0.17        | -0.14        | -0.21        | -0.13        | -0.14        |
| R23      | -0.08        | -0.19        | -0.10        | -0.10        | -0.08        | -0.19        | -0.09        | -0.10        |
| R24      | -0.10        | -0.20        | -0.07        | -0.15        | -0.06        | -0.15        | -0.06        | -0.13        |
| R25      | -0.05        | -0.16        | -0.08        | -0.12        | -0.06        | -0.15        | -0.10        | -0.06        |
| R26      | 0.16         | 0.20         | -0.01        | -0.06        | 0.19         | -0.12        | 0.06         | -0.06        |
| R27      | -0.08        | -0.15        | -0.04        | -0.11        | -0.06        | -0.15        | -0.04        | -0.06        |
| R28      | -0.08        | -0.11        | 0.06         | -0.01        | -0.08        | -0.04        | 0.03         | -0.13        |
| R29      | -0.07        | -0.15        | -0.08        | -0.14        | -0.11        | -0.18        | -0.15        | -0.13        |
| R30      | -0.12        | -0.18        | -0.10        | -0.14        | -0.09        | -0.22        | -0.14        | -0.13        |
| R31      | -0.10        | -0.20        | -0.10        | -0.15        | -0.12        | -0.20        | -0.15        | -0.10        |
| R32      | -0.16        | -0.19        | -0.13        | -0.16        | -0.15        | -0.19        | -0.15        | -0.12        |
| R33      | -0.09        | -0.20        | -0.11        | -0.10        | -0.09        | -0.18        | -0.12        | -0.09        |
| R34      | -0.15        | -0.22        | -0.15        | -0.13        | -0.14        | -0.22        | -0.15        | -0.15        |
| R35      | -0.06        | -0.18        | -0.13        | -0.14        | -0.07        | -0.15        | -0.13        | -0.12        |
| R36      | -0.04        | -0.22        | -0.17        | -0.17        | -0.05        | -0.17        | -0.14        | -0.14        |
| R37      | -0.08        | -0.14        | -0.10        | -0.09        | -0.04        | -0.13        | -0.04        | -0.10        |
| R38      | 0.06         | -0.13        | -0.07        | -0.11        | 0.01         | -0.09        | -0.04        | -0.10        |
| R39      | -0.12        | -0.22        | -0.17        | -0.19        | -0.15        | -0.22        | -0.18        | -0.14        |
| R40      | -0.11        | -0.16        | -0.06        | -0.11        | -0.08        | -0.13        | -0.09        | -0.06        |
| R41      | -0.11        | -0.16        | -0.10        | -0.16        | -0.08        | -0.17        | -0.15        | -0.15        |
| R42      | -0.07        | -0.10        | -0.10        | -0.10        | -0.03        | -0.09        | -0.10        | -0.06        |
| R43      | -0.24        | -0.31        | -0.28        | -0.26        | -0.25        | -0.32        | -0.26        | -0.24        |
| R44      | -0.06        | -0.12        | -0.10        | -0.06        | -0.06        | -0.12        | -0.07        | -0.06        |
| R45      | -0.13        | -0.18        | -0.16        | -0.21        | -0.17        | -0.21        | -0.20        | -0.20        |
| R46      | -0.07        | -0.13        | -0.01        | -0.12        | -0.06        | -0.13        | -0.05        | -0.08        |
| R47      | -0.09        | -0.13        | -0.03        | -0.08        | -0.10        | -0.13        | -0.05        | -0.06        |

|          |       |       |       |       |       |       |       |       |
|----------|-------|-------|-------|-------|-------|-------|-------|-------|
| R48      | 0.00  | -0.12 | -0.03 | -0.09 | -0.04 | -0.12 | -0.06 | -0.09 |
| R49      | -0.02 | -0.10 | -0.05 | -0.03 | -0.01 | -0.09 | -0.05 | -0.02 |
| R50      | 0.00  | -0.09 | -0.02 | -0.05 | -0.02 | -0.09 | 0.00  | -0.03 |
| R51      | 0.95  | -0.05 | 0.02  | -0.04 | 0.05  | -0.05 | -0.01 | -0.01 |
| R52      | 0.06  | -0.05 | -0.01 | -0.01 | 0.06  | -0.06 | 0.00  | -0.01 |
| R53      | -0.09 | -0.17 | -0.03 | -0.13 | -0.11 | -0.17 | -0.12 | -0.10 |
| R54      | -0.03 | -0.02 | 0.00  | -0.09 | 0.10  | -0.01 | -0.09 | -0.07 |
| R55      | -0.06 | -0.17 | -0.11 | -0.17 | -0.10 | -0.20 | -0.17 | -0.14 |
| R56      | 0.12  | -0.13 | 0.07  | -0.03 | 0.09  | -0.03 | 0.03  | -0.03 |
| PROMEDIO | -0.05 | -0.15 | -0.08 | -0.13 | -0.07 | -0.15 | -0.10 | -0.11 |
| MEDIANA  | -0.08 | -0.16 | -0.09 | -0.13 | -0.08 | -0.16 | -0.11 | -0.11 |
| RMSE     | 0.156 | 0.165 | 0.103 | 0.134 | 0.104 | 0.164 | 0.122 | 0.119 |

Table S75. Field values of vegetation height measured at GCPs ('field' column) and values extracted from DOD<sub>5-5</sub> for the eight missions. For each point corresponding specie ('spp' column) is also reported. Each column identifies the mission: m01<sub>5-5</sub> represents data extracted from DOD<sub>5-5</sub> of mission 1, and so on. Values expressed in meters.

| Point Id | spp                    | field | m01 <sub>5-5</sub> | m02 <sub>5-5</sub> | m03 <sub>5-5</sub> | m04 <sub>5-5</sub> | m05 <sub>5-5</sub> | m06 <sub>5-5</sub> | m07 <sub>5-5</sub> | m08 <sub>5-5</sub> |
|----------|------------------------|-------|--------------------|--------------------|--------------------|--------------------|--------------------|--------------------|--------------------|--------------------|
| C1       | Salicornia             | 0.07  | 0.16               | 0.03               | 0.09               | 0.07               | -                  | -                  | -                  | -                  |
| C2       | Salicornia             | 0.07  | 0.16               | 0.05               | 0.14               | 0.10               | -                  | -                  | -                  | -                  |
| C3       | Salicornia             | 0.13  | 0.18               | 0.11               | 0.13               | 0.12               | -                  | -                  | -                  | -                  |
| C4       | Salicornia             | 0.13  | 0.15               | 0.10               | 0.09               | 0.10               | -                  | -                  | -                  | -                  |
| R2       | Salicornia             | 0.18  | 0.12               | 0.04               | 0.11               | 0.09               | 0.14               | 0.04               | 0.07               | 0.09               |
| R3       | Salicornia             | 0.2   | 0.14               | 0.07               | 0.20               | 0.06               | 0.16               | 0.06               | 0.12               | 0.09               |
| R4       | Salicornia             | 0.13  | 0.12               | 0.03               | 0.10               | 0.03               | 0.10               | 0.03               | 0.06               | 0.06               |
| R5       | Salicornia             | 0.12  | 0.14               | 0.03               | 0.23               | 0.09               | 0.12               | 0.03               | 0.07               | 0.10               |
| R6       | Salicornia             | 0.2   | 0.18               | 0.04               | 0.11               | 0.08               | 0.12               | 0.05               | 0.09               | 0.09               |
| R7       | Salicornia             | 0.19  | 0.12               | 0.02               | 0.08               | 0.08               | 0.12               | 0.04               | 0.08               | 0.10               |
| R8       | Salicornia             | 0.2   | 0.14               | 0.04               | 0.10               | 0.08               | 0.14               | 0.05               | 0.09               | 0.08               |
| R9       | Salicornia             | 0.19  | 0.15               | 0.04               | 0.11               | 0.09               | 0.14               | 0.05               | 0.13               | 0.08               |
| R10      | Salicornia             | 0.23  | 0.18               | 0.06               | 0.17               | 0.09               | 0.15               | 0.05               | 0.12               | 0.11               |
| R11      | Salicornia             | 0.28  | 0.37               | 0.28               | 0.26               | 0.24               | 0.37               | 0.32               | 0.16               | 0.16               |
| R12      | Salicornia             | 0.3   | 0.17               | 0.05               | 0.12               | 0.10               | 0.15               | 0.07               | 0.11               | 0.11               |
| R13      | Sarcocornia            | 0.23  | 0.13               | 0.04               | 0.14               | 0.09               | 0.14               | 0.05               | 0.10               | 0.12               |
| R14      | Sarcocornia            | 0.24  | 0.15               | 0.09               | 0.17               | 0.07               | 0.16               | 0.09               | 0.16               | 0.13               |
| R15      | Sarcocornia+Sporobolus | 0.35  | 0.14               | 0.09               | 0.24               | 0.12               | 0.15               | 0.08               | 0.18               | 0.14               |
| R16      | Sarcocornia            | 0.25  | 0.19               | 0.11               | 0.07               | 0.08               | 0.19               | 0.04               | 0.10               | 0.14               |
| R17      | Sarcocornia            | 0.26  | 0.31               | 0.35               | 0.24               | 0.07               | 0.26               | 0.27               | 0.21               | 0.08               |
| R18      | Sarcocornia            | 0.27  | 0.13               | 0.05               | 0.14               | 0.06               | 0.15               | 0.03               | 0.12               | 0.11               |
| R19      | Sarcocornia            | 0.27  | 0.15               | 0.08               | 0.14               | 0.10               | 0.15               | 0.07               | 0.13               | 0.14               |
| R20      | Sarcocornia            | 0.29  | 0.26               | 0.18               | 0.17               | 0.12               | 0.25               | 0.12               | 0.16               | 0.16               |
| R21      | Sarcocornia            | 0.23  | 0.16               | 0.06               | 0.09               | 0.08               | 0.18               | 0.07               | 0.14               | 0.12               |
| R22      | Sarcocornia            | 0.28  | 0.17               | 0.09               | 0.14               | 0.13               | 0.19               | 0.06               | 0.19               | 0.15               |
| R23      | Sarcocornia            | 0.22  | 0.16               | 0.04               | 0.15               | 0.12               | 0.16               | 0.04               | 0.15               | 0.13               |
| R24      | Sarcocornia            | 0.27  | 0.24               | 0.10               | 0.23               | 0.14               | 0.24               | 0.17               | 0.24               | 0.15               |
| R25      | Sarcocornia            | 0.21  | 0.17               | 0.06               | 0.09               | 0.11               | 0.17               | 0.07               | 0.17               | 0.15               |
| R26      | Sarcocornia            | 0.2   | 0.42               | 0.44               | 0.18               | 0.11               | 0.37               | 0.39               | 0.25               | 0.16               |
| R27      | Sarcocornia            | 0.2   | 0.13               | 0.06               | 0.14               | 0.09               | 0.13               | 0.08               | 0.17               | 0.14               |
| R28      | Sarcocornia            | 0.23  | 0.27               | 0.22               | 0.34               | 0.12               | 0.24               | 0.29               | 0.27               | 0.13               |
| R29      | Sarcocornia            | 0.23  | 0.15               | 0.06               | 0.17               | 0.10               | 0.15               | 0.07               | 0.13               | 0.12               |
| R30      | Sarcocornia            | 0.26  | 0.16               | 0.10               | 0.20               | 0.14               | 0.16               | 0.08               | 0.16               | 0.14               |
| R31      | Sarcocornia            | 0.26  | 0.16               | 0.07               | 0.16               | 0.12               | 0.14               | 0.06               | 0.16               | 0.18               |
| R32      | Sarcocornia            | 0.21  | 0.09               | 0.04               | 0.11               | 0.03               | 0.10               | 0.04               | 0.10               | 0.12               |
| R33      | Sarcocornia            | 0.21  | 0.14               | 0.04               | 0.10               | 0.12               | 0.15               | 0.04               | 0.10               | 0.14               |
| R34      | Sarcocornia            | 0.28  | 0.17               | 0.08               | 0.16               | 0.16               | 0.15               | 0.09               | 0.17               | 0.16               |
| R35      | Sarcocornia            | 0.27  | 0.20               | 0.08               | 0.13               | 0.14               | 0.21               | 0.14               | 0.15               | 0.14               |
| R36      | Sarcocornia            | 0.28  | 0.23               | 0.09               | 0.12               | 0.12               | 0.22               | 0.07               | 0.14               | 0.13               |
| R37      | Sarcocornia            | 0.2   | 0.14               | 0.06               | 0.13               | 0.11               | 0.14               | 0.08               | 0.17               | 0.13               |

|     |                        |      |      |      |      |      |      |      |      |      |
|-----|------------------------|------|------|------|------|------|------|------|------|------|
| R38 | Sarcocornia            | 0.24 | 0.23 | 0.11 | 0.16 | 0.13 | 0.43 | 0.11 | 0.22 | 0.15 |
| R39 | Sarcocornia            | 0.29 | 0.18 | 0.06 | 0.14 | 0.14 | 0.15 | 0.07 | 0.14 | 0.15 |
| R40 | Sarcocornia            | 0.22 | 0.13 | 0.09 | 0.17 | 0.13 | 0.13 | 0.10 | 0.18 | 0.16 |
| R41 | Sarcocornia            | 0.21 | 0.11 | 0.05 | 0.09 | 0.05 | 0.12 | 0.04 | 0.07 | 0.07 |
| R42 | Sarcocornia            | 0.2  | 0.16 | 0.10 | 0.11 | 0.12 | 0.17 | 0.12 | 0.10 | 0.16 |
| R43 | Sarcocornia+Sporobolus | 0.34 | 0.09 | 0.05 | 0.08 | 0.09 | 0.13 | 0.05 | 0.09 | 0.13 |
| R44 | Sarcocornia            | 0.19 | 0.14 | 0.07 | 0.07 | 0.13 | 0.14 | 0.07 | 0.12 | 0.17 |
| R45 | Sarcocornia            | 0.29 | 0.16 | 0.09 | 0.12 | 0.09 | 0.13 | 0.09 | 0.10 | 0.09 |
| R46 | Salicornia             | 0.17 | 0.13 | 0.05 | 0.14 | 0.06 | 0.13 | 0.04 | 0.16 | 0.11 |
| R47 | Salicornia             | 0.18 | 0.12 | 0.04 | 0.14 | 0.12 | 0.11 | 0.06 | 0.15 | 0.14 |
| R48 | Salicornia             | 0.17 | 0.17 | 0.05 | 0.14 | 0.11 | 0.14 | 0.06 | 0.13 | 0.10 |
| R49 | Salicornia             | 0.14 | 0.11 | 0.03 | 0.11 | 0.10 | 0.15 | 0.04 | 0.12 | 0.13 |
| R50 | Salicornia             | 0.14 | 0.14 | 0.05 | 0.17 | 0.11 | 0.12 | 0.05 | 0.14 | 0.12 |
| R51 | Salicornia             | 0.15 | 1.29 | 0.10 | 0.23 | 0.11 | 0.19 | 0.12 | 0.16 | 0.13 |
| R52 | Salicornia             | 0.13 | 0.22 | 0.07 | 0.10 | 0.13 | 0.21 | 0.06 | 0.15 | 0.13 |
| R53 | Sarcocornia            | 0.25 | 0.16 | 0.07 | 0.25 | 0.13 | 0.14 | 0.07 | 0.17 | 0.17 |
| R54 | Sarcocornia            | 0.2  | 0.17 | 0.23 | 0.14 | 0.12 | 0.30 | 0.32 | 0.14 | 0.12 |
| R55 | Sarcocornia            | 0.29 | 0.25 | 0.11 | 0.23 | 0.12 | 0.20 | 0.10 | 0.14 | 0.16 |
| R56 | Sarcocornia            | 0.13 | 0.28 | 0.08 | 0.26 | 0.13 | 0.23 | 0.03 | 0.16 | 0.11 |

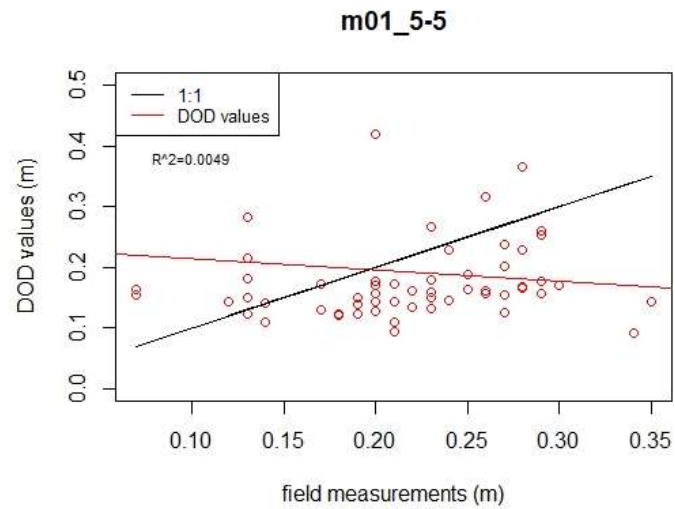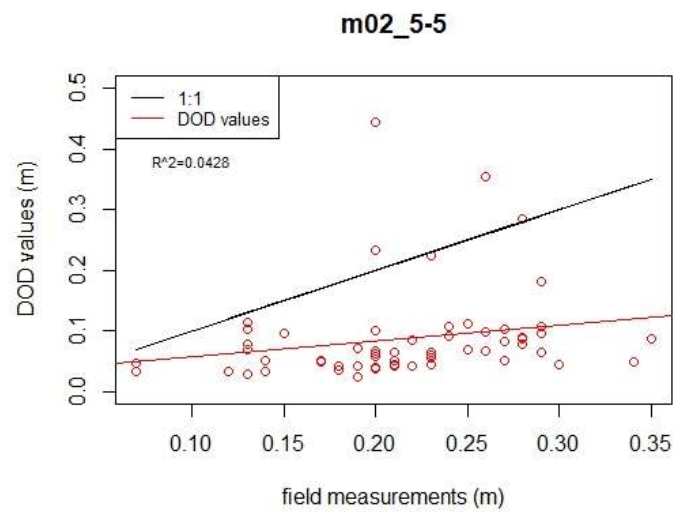

Figure S28. (Continue)

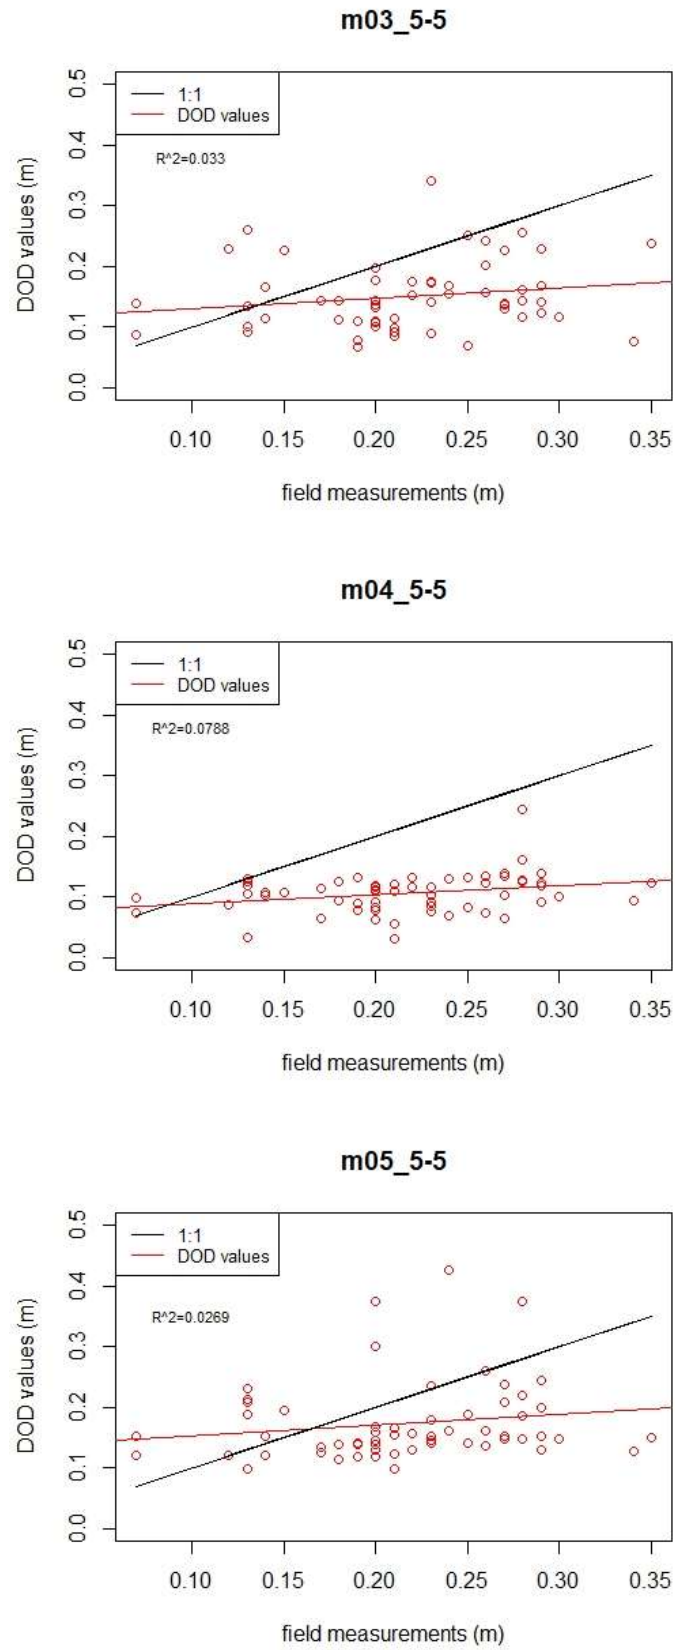

Figure S28. (Continue)

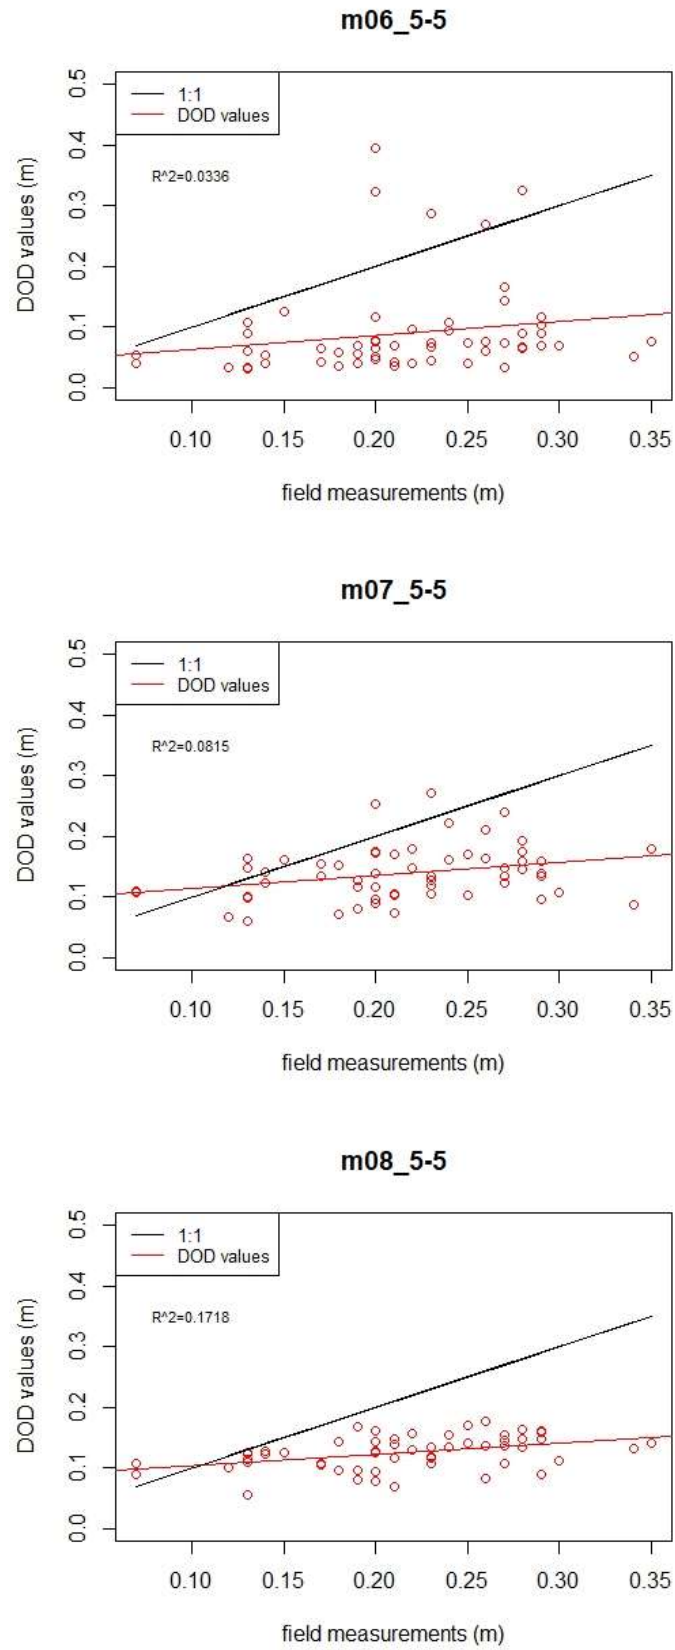

Figure S28. Linear regression and  $R^2$  value for  $DOD_{5-5}$  for all the eight missions compared to vegetation height values of GCPs. The red line is the regression line for the compared datasets, the black line represents the 1:1 pattern.

Table S76. Values of difference from field measurements for  $DOD_{5-5}$  for the eight missions at each point. Each column identifies the mission:  $m01_{5-5}$  represents data extracted from  $DOD_{5-5}$  of mission 1, and so on. Values expressed in meters. Negative values underestimate canopy height, positive values overestimate canopy height. The average RMSE defining the output for each mission is shown at the bottom of the respective column.

| Point Id | $m01_{5-5}$ | $m02_{5-5}$ | $m03_{5-5}$ | $m04_{5-5}$ | $m05_{5-5}$ | $m06_{5-5}$ | $m07_{5-5}$ | $m08_{5-5}$ |
|----------|-------------|-------------|-------------|-------------|-------------|-------------|-------------|-------------|
| C1       | 0.09        | -0.04       | 0.02        | 0.00        | -           | -           | -           | -           |
| C2       | 0.09        | -0.02       | 0.07        | 0.03        | -           | -           | -           | -           |
| C3       | 0.05        | -0.02       | 0.00        | -0.01       | -           | -           | -           | -           |
| C4       | 0.02        | -0.03       | -0.04       | -0.03       | -           | -           | -           | -           |
| R2       | -0.06       | -0.14       | -0.07       | -0.09       | -0.04       | -0.14       | -0.11       | -0.09       |
| R3       | -0.06       | -0.13       | 0.00        | -0.14       | -0.04       | -0.14       | -0.08       | -0.11       |
| R4       | -0.01       | -0.10       | -0.03       | -0.10       | -0.03       | -0.10       | -0.07       | -0.07       |
| R5       | 0.02        | -0.09       | 0.11        | -0.03       | 0.00        | -0.09       | -0.05       | -0.02       |
| R6       | -0.02       | -0.16       | -0.09       | -0.12       | -0.08       | -0.15       | -0.11       | -0.11       |
| R7       | -0.07       | -0.17       | -0.11       | -0.11       | -0.07       | -0.15       | -0.11       | -0.09       |
| R8       | -0.06       | -0.16       | -0.10       | -0.12       | -0.06       | -0.15       | -0.11       | -0.12       |
| R9       | -0.04       | -0.15       | -0.08       | -0.10       | -0.05       | -0.14       | -0.06       | -0.11       |
| R10      | -0.05       | -0.17       | -0.06       | -0.14       | -0.08       | -0.18       | -0.11       | -0.12       |
| R11      | 0.09        | 0.00        | -0.02       | -0.04       | 0.09        | 0.04        | -0.12       | -0.12       |
| R12      | -0.13       | -0.25       | -0.18       | -0.20       | -0.15       | -0.23       | -0.19       | -0.19       |
| R13      | -0.10       | -0.19       | -0.09       | -0.14       | -0.09       | -0.18       | -0.13       | -0.11       |
| R14      | -0.09       | -0.15       | -0.07       | -0.17       | -0.08       | -0.15       | -0.08       | -0.11       |
| R15      | -0.21       | -0.26       | -0.11       | -0.23       | -0.20       | -0.27       | -0.17       | -0.21       |
| R16      | -0.06       | -0.14       | -0.18       | -0.17       | -0.06       | -0.21       | -0.15       | -0.11       |
| R17      | 0.05        | 0.09        | -0.02       | -0.19       | 0.00        | 0.01        | -0.05       | -0.18       |
| R18      | -0.15       | -0.22       | -0.13       | -0.21       | -0.12       | -0.24       | -0.15       | -0.16       |
| R19      | -0.12       | -0.19       | -0.13       | -0.17       | -0.12       | -0.20       | -0.14       | -0.13       |
| R20      | -0.03       | -0.11       | -0.12       | -0.17       | -0.04       | -0.17       | -0.13       | -0.13       |
| R21      | -0.07       | -0.17       | -0.14       | -0.15       | -0.05       | -0.16       | -0.09       | -0.11       |
| R22      | -0.11       | -0.19       | -0.14       | -0.15       | -0.09       | -0.22       | -0.09       | -0.13       |
| R23      | -0.06       | -0.18       | -0.07       | -0.10       | -0.06       | -0.18       | -0.07       | -0.09       |
| R24      | -0.03       | -0.17       | -0.04       | -0.13       | -0.03       | -0.10       | -0.03       | -0.12       |
| R25      | -0.04       | -0.15       | -0.12       | -0.10       | -0.04       | -0.14       | -0.04       | -0.06       |
| R26      | 0.22        | 0.24        | -0.02       | -0.09       | 0.17        | 0.19        | 0.05        | -0.04       |
| R27      | -0.07       | -0.14       | -0.06       | -0.11       | -0.07       | -0.12       | -0.03       | -0.06       |
| R28      | 0.04        | -0.01       | 0.11        | -0.11       | 0.01        | 0.06        | 0.04        | -0.10       |
| R29      | -0.08       | -0.17       | -0.06       | -0.13       | -0.08       | -0.16       | -0.10       | -0.11       |
| R30      | -0.10       | -0.16       | -0.06       | -0.12       | -0.10       | -0.18       | -0.10       | -0.12       |
| R31      | -0.10       | -0.19       | -0.10       | -0.14       | -0.12       | -0.20       | -0.10       | -0.08       |
| R32      | -0.12       | -0.17       | -0.10       | -0.18       | -0.11       | -0.17       | -0.11       | -0.09       |
| R33      | -0.07       | -0.17       | -0.11       | -0.09       | -0.06       | -0.17       | -0.11       | -0.07       |
| R34      | -0.11       | -0.20       | -0.12       | -0.12       | -0.13       | -0.19       | -0.11       | -0.12       |
| R35      | -0.07       | -0.19       | -0.14       | -0.13       | -0.06       | -0.13       | -0.12       | -0.13       |
| R36      | -0.05       | -0.19       | -0.16       | -0.16       | -0.06       | -0.21       | -0.14       | -0.15       |
| R37      | -0.06       | -0.14       | -0.07       | -0.09       | -0.06       | -0.12       | -0.03       | -0.07       |
| R38      | -0.01       | -0.13       | -0.08       | -0.11       | 0.19        | -0.13       | -0.02       | -0.09       |
| R39      | -0.11       | -0.23       | -0.15       | -0.15       | -0.14       | -0.22       | -0.15       | -0.14       |
| R40      | -0.09       | -0.13       | -0.05       | -0.09       | -0.09       | -0.12       | -0.04       | -0.06       |
| R41      | -0.10       | -0.16       | -0.12       | -0.16       | -0.09       | -0.17       | -0.14       | -0.14       |
| R42      | -0.04       | -0.10       | -0.09       | -0.08       | -0.03       | -0.08       | -0.10       | -0.04       |
| R43      | -0.25       | -0.29       | -0.26       | -0.25       | -0.21       | -0.29       | -0.25       | -0.21       |
| R44      | -0.05       | -0.12       | -0.12       | -0.06       | -0.05       | -0.12       | -0.07       | -0.02       |
| R45      | -0.13       | -0.20       | -0.17       | -0.20       | -0.16       | -0.20       | -0.19       | -0.20       |
| R46      | -0.04       | -0.12       | -0.03       | -0.11       | -0.05       | -0.13       | -0.01       | -0.06       |
| R47      | -0.06       | -0.14       | -0.04       | -0.06       | -0.07       | -0.12       | -0.03       | -0.04       |

|          |       |       |       |       |       |       |       |       |
|----------|-------|-------|-------|-------|-------|-------|-------|-------|
| R48      | 0.00  | -0.12 | -0.03 | -0.06 | -0.03 | -0.11 | -0.04 | -0.07 |
| R49      | -0.03 | -0.11 | -0.03 | -0.04 | 0.01  | -0.10 | -0.02 | -0.01 |
| R50      | 0.00  | -0.09 | 0.03  | -0.03 | -0.02 | -0.09 | 0.00  | -0.02 |
| R51      | 1.14  | -0.05 | 0.08  | -0.04 | 0.04  | -0.03 | 0.01  | -0.03 |
| R52      | 0.09  | -0.06 | -0.03 | 0.00  | 0.08  | -0.07 | 0.02  | 0.00  |
| R53      | -0.09 | -0.18 | 0.00  | -0.12 | -0.11 | -0.18 | -0.08 | -0.08 |
| R54      | -0.03 | 0.03  | -0.06 | -0.08 | 0.10  | 0.12  | -0.06 | -0.08 |
| R55      | -0.04 | -0.18 | -0.06 | -0.17 | -0.09 | -0.19 | -0.15 | -0.13 |
| R56      | 0.15  | -0.05 | 0.13  | 0.00  | 0.10  | -0.10 | 0.03  | -0.02 |
| PROMEDIO | -0.03 | -0.14 | -0.07 | -0.12 | -0.05 | -0.13 | -0.08 | -0.10 |
| MEDIANA  | -0.06 | -0.15 | -0.07 | -0.12 | -0.06 | -0.15 | -0.09 | -0.11 |
| RMSE     | 0.173 | 0.155 | 0.100 | 0.126 | 0.093 | 0.160 | 0.104 | 0.110 |

Table S77. Field values of vegetation height measured at GCPs ('field' column) and values extracted from DOD<sub>5-10</sub> for the eight missions. For each point corresponding specie ('spp' column) is also reported. Each column identifies the mission: m01<sub>5-10</sub> represents data extracted from DOD<sub>5-10</sub> of mission 1, and so on. Values expressed in meters.

| Point Id | spp                    | field | m01 <sub>5-10</sub> | m02 <sub>5-10</sub> | m03 <sub>5-10</sub> | m04 <sub>5-10</sub> | m05 <sub>5-10</sub> | m06 <sub>5-10</sub> | m07 <sub>5-10</sub> | m08 <sub>5-10</sub> |
|----------|------------------------|-------|---------------------|---------------------|---------------------|---------------------|---------------------|---------------------|---------------------|---------------------|
| C1       | Salicornia             | 0.07  | 0.16                | 0.04                | 0.10                | 0.07                | -                   | -                   | -                   | -                   |
| C2       | Salicornia             | 0.07  | 0.17                | 0.05                | 0.13                | 0.10                | -                   | -                   | -                   | -                   |
| C3       | Salicornia             | 0.13  | 0.18                | 0.11                | 0.13                | 0.12                | -                   | -                   | -                   | -                   |
| C4       | Salicornia             | 0.13  | 0.15                | 0.10                | 0.10                | 0.11                | -                   | -                   | -                   | -                   |
| R2       | Salicornia             | 0.18  | 0.12                | 0.03                | 0.12                | 0.08                | 0.14                | 0.04                | 0.08                | 0.10                |
| R3       | Salicornia             | 0.2   | 0.14                | 0.07                | 0.17                | 0.06                | 0.15                | 0.06                | 0.14                | 0.10                |
| R4       | Salicornia             | 0.13  | 0.12                | 0.02                | 0.13                | 0.03                | 0.09                | 0.03                | 0.07                | 0.05                |
| R5       | Salicornia             | 0.12  | 0.13                | 0.03                | 0.16                | 0.09                | 0.13                | 0.03                | 0.06                | 0.10                |
| R6       | Salicornia             | 0.2   | 0.17                | 0.05                | 0.12                | 0.08                | 0.12                | 0.05                | 0.09                | 0.09                |
| R7       | Salicornia             | 0.19  | 0.13                | 0.03                | 0.10                | 0.08                | 0.12                | 0.04                | 0.08                | 0.09                |
| R8       | Salicornia             | 0.2   | 0.14                | 0.04                | 0.10                | 0.08                | 0.13                | 0.06                | 0.09                | 0.08                |
| R9       | Salicornia             | 0.19  | 0.16                | 0.04                | 0.12                | 0.09                | 0.14                | 0.06                | 0.12                | 0.08                |
| R10      | Salicornia             | 0.23  | 0.17                | 0.06                | 0.17                | 0.08                | 0.14                | 0.05                | 0.12                | 0.12                |
| R11      | Salicornia             | 0.28  | 0.28                | 0.12                | 0.22                | 0.18                | 0.33                | 0.20                | 0.17                | 0.16                |
| R12      | Salicornia             | 0.3   | 0.17                | 0.05                | 0.12                | 0.10                | 0.15                | 0.08                | 0.11                | 0.13                |
| R13      | Sarcocornia            | 0.23  | 0.13                | 0.04                | 0.12                | 0.09                | 0.14                | 0.04                | 0.10                | 0.11                |
| R14      | Sarcocornia            | 0.24  | 0.15                | 0.11                | 0.17                | 0.08                | 0.17                | 0.09                | 0.15                | 0.13                |
| R15      | Sarcocornia+Sporobolus | 0.35  | 0.15                | 0.09                | 0.23                | 0.12                | 0.15                | 0.08                | 0.17                | 0.14                |
| R16      | Sarcocornia            | 0.25  | 0.16                | 0.08                | 0.12                | 0.09                | 0.17                | 0.09                | 0.13                | 0.14                |
| R17      | Sarcocornia            | 0.26  | 0.20                | 0.26                | 0.27                | 0.07                | 0.18                | 0.14                | 0.22                | 0.10                |
| R18      | Sarcocornia            | 0.27  | 0.12                | 0.05                | 0.13                | 0.06                | 0.15                | 0.05                | 0.11                | 0.11                |
| R19      | Sarcocornia            | 0.27  | 0.16                | 0.09                | 0.14                | 0.11                | 0.15                | 0.07                | 0.15                | 0.15                |

|     |                        |          |      |      |      |      |      |      |      |      |
|-----|------------------------|----------|------|------|------|------|------|------|------|------|
| R20 | Sarcocornia            | 0.2<br>9 | 0.20 | 0.15 | 0.18 | 0.12 | 0.23 | 0.12 | 0.15 | 0.18 |
| R21 | Sarcocornia            | 0.2<br>3 | 0.16 | 0.06 | 0.10 | 0.08 | 0.19 | 0.08 | 0.13 | 0.12 |
| R22 | Sarcocornia            | 0.2<br>8 | 0.17 | 0.07 | 0.15 | 0.13 | 0.18 | 0.07 | 0.18 | 0.15 |
| R23 | Sarcocornia            | 0.2<br>2 | 0.16 | 0.04 | 0.16 | 0.12 | 0.15 | 0.04 | 0.14 | 0.13 |
| R24 | Sarcocornia            | 0.2<br>7 | 0.20 | 0.15 | 0.21 | 0.16 | 0.22 | 0.13 | 0.22 | 0.17 |
| R25 | Sarcocornia            | 0.2<br>1 | 0.17 | 0.06 | 0.13 | 0.11 | 0.16 | 0.07 | 0.16 | 0.15 |
| R26 | Sarcocornia            | 0.2      | 0.38 | 0.43 | 0.22 | 0.12 | 0.40 | 0.36 | 0.27 | 0.14 |
| R27 | Sarcocornia            | 0.2      | 0.13 | 0.07 | 0.14 | 0.09 | 0.14 | 0.07 | 0.18 | 0.14 |
| R28 | Sarcocornia            | 0.2<br>3 | 0.21 | 0.13 | 0.31 | 0.10 | 0.18 | 0.20 | 0.25 | 0.18 |
| R29 | Sarcocornia            | 0.2<br>3 | 0.15 | 0.06 | 0.15 | 0.10 | 0.14 | 0.06 | 0.11 | 0.13 |
| R30 | Sarcocornia            | 0.2<br>6 | 0.16 | 0.10 | 0.15 | 0.13 | 0.17 | 0.07 | 0.14 | 0.14 |
| R31 | Sarcocornia            | 0.2<br>6 | 0.16 | 0.06 | 0.16 | 0.12 | 0.14 | 0.06 | 0.15 | 0.17 |
| R32 | Sarcocornia            | 0.2<br>1 | 0.08 | 0.04 | 0.12 | 0.05 | 0.10 | 0.03 | 0.09 | 0.11 |
| R33 | Sarcocornia            | 0.2<br>1 | 0.13 | 0.03 | 0.11 | 0.12 | 0.15 | 0.04 | 0.10 | 0.14 |
| R34 | Sarcocornia            | 0.2<br>8 | 0.17 | 0.08 | 0.16 | 0.16 | 0.16 | 0.09 | 0.18 | 0.16 |
| R35 | Sarcocornia            | 0.2<br>7 | 0.23 | 0.14 | 0.14 | 0.15 | 0.22 | 0.14 | 0.14 | 0.16 |
| R36 | Sarcocornia            | 0.2<br>8 | 0.25 | 0.11 | 0.13 | 0.13 | 0.24 | 0.08 | 0.14 | 0.15 |
| R37 | Sarcocornia            | 0.2      | 0.14 | 0.05 | 0.13 | 0.11 | 0.15 | 0.07 | 0.17 | 0.12 |
| R38 | Sarcocornia            | 0.2<br>4 | 0.21 | 0.12 | 0.27 | 0.13 | 0.38 | 0.14 | 0.26 | 0.15 |
| R39 | Sarcocornia            | 0.2<br>9 | 0.17 | 0.07 | 0.16 | 0.14 | 0.15 | 0.07 | 0.13 | 0.14 |
| R40 | Sarcocornia            | 0.2<br>2 | 0.13 | 0.09 | 0.18 | 0.12 | 0.14 | 0.09 | 0.19 | 0.16 |
| R41 | Sarcocornia            | 0.2<br>1 | 0.11 | 0.05 | 0.12 | 0.06 | 0.13 | 0.04 | 0.07 | 0.07 |
| R42 | Sarcocornia            | 0.2      | 0.16 | 0.11 | 0.11 | 0.12 | 0.17 | 0.12 | 0.10 | 0.17 |
| R43 | Sarcocornia+Sporobolus | 0.3<br>4 | 0.10 | 0.05 | 0.09 | 0.09 | 0.12 | 0.05 | 0.09 | 0.13 |
| R44 | Sarcocornia            | 0.1<br>9 | 0.14 | 0.07 | 0.08 | 0.13 | 0.14 | 0.07 | 0.12 | 0.16 |
| R45 | Sarcocornia            | 0.2<br>9 | 0.17 | 0.11 | 0.13 | 0.09 | 0.14 | 0.09 | 0.11 | 0.10 |
| R46 | Salicornia             | 0.1<br>7 | 0.13 | 0.05 | 0.16 | 0.06 | 0.13 | 0.05 | 0.13 | 0.11 |
| R47 | Salicornia             | 0.1<br>8 | 0.12 | 0.05 | 0.15 | 0.12 | 0.11 | 0.06 | 0.16 | 0.14 |
| R48 | Salicornia             | 0.1<br>7 | 0.17 | 0.06 | 0.17 | 0.11 | 0.14 | 0.07 | 0.13 | 0.11 |
| R49 | Salicornia             | 0.1<br>4 | 0.15 | 0.04 | 0.14 | 0.10 | 0.14 | 0.05 | 0.11 | 0.13 |
| R50 | Salicornia             | 0.1<br>4 | 0.14 | 0.06 | 0.16 | 0.10 | 0.12 | 0.06 | 0.13 | 0.11 |
| R51 | Salicornia             | 0.1<br>5 | 1.30 | 0.11 | 0.19 | 0.11 | 0.20 | 0.12 | 0.16 | 0.13 |
| R52 | Salicornia             | 0.1<br>3 | 0.21 | 0.08 | 0.12 | 0.13 | 0.20 | 0.07 | 0.15 | 0.13 |

|     |             |      |      |      |      |      |      |      |      |      |
|-----|-------------|------|------|------|------|------|------|------|------|------|
| R53 | Sarcocornia | 0.25 | 0.16 | 0.07 | 0.25 | 0.13 | 0.13 | 0.08 | 0.16 | 0.17 |
| R54 | Sarcocornia | 0.2  | 0.17 | 0.19 | 0.16 | 0.12 | 0.30 | 0.27 | 0.15 | 0.14 |
| R55 | Sarcocornia | 0.29 | 0.25 | 0.10 | 0.22 | 0.12 | 0.19 | 0.08 | 0.16 | 0.16 |
| R56 | Sarcocornia | 0.13 | 0.25 | 0.08 | 0.23 | 0.12 | 0.25 | 0.09 | 0.15 | 0.12 |

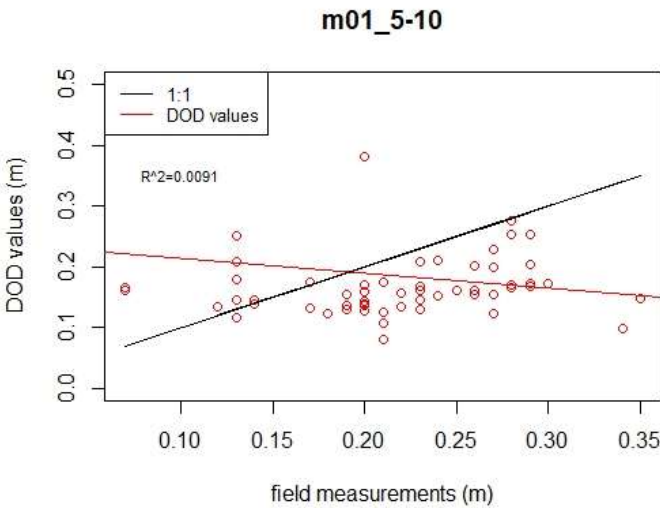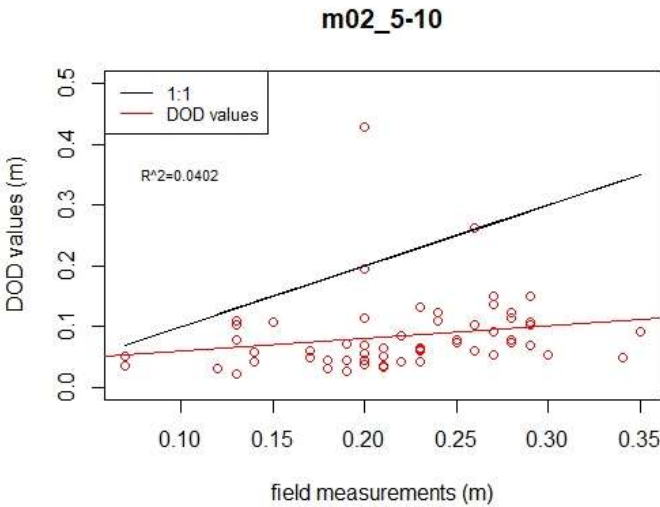

Figure S29. (Continue)

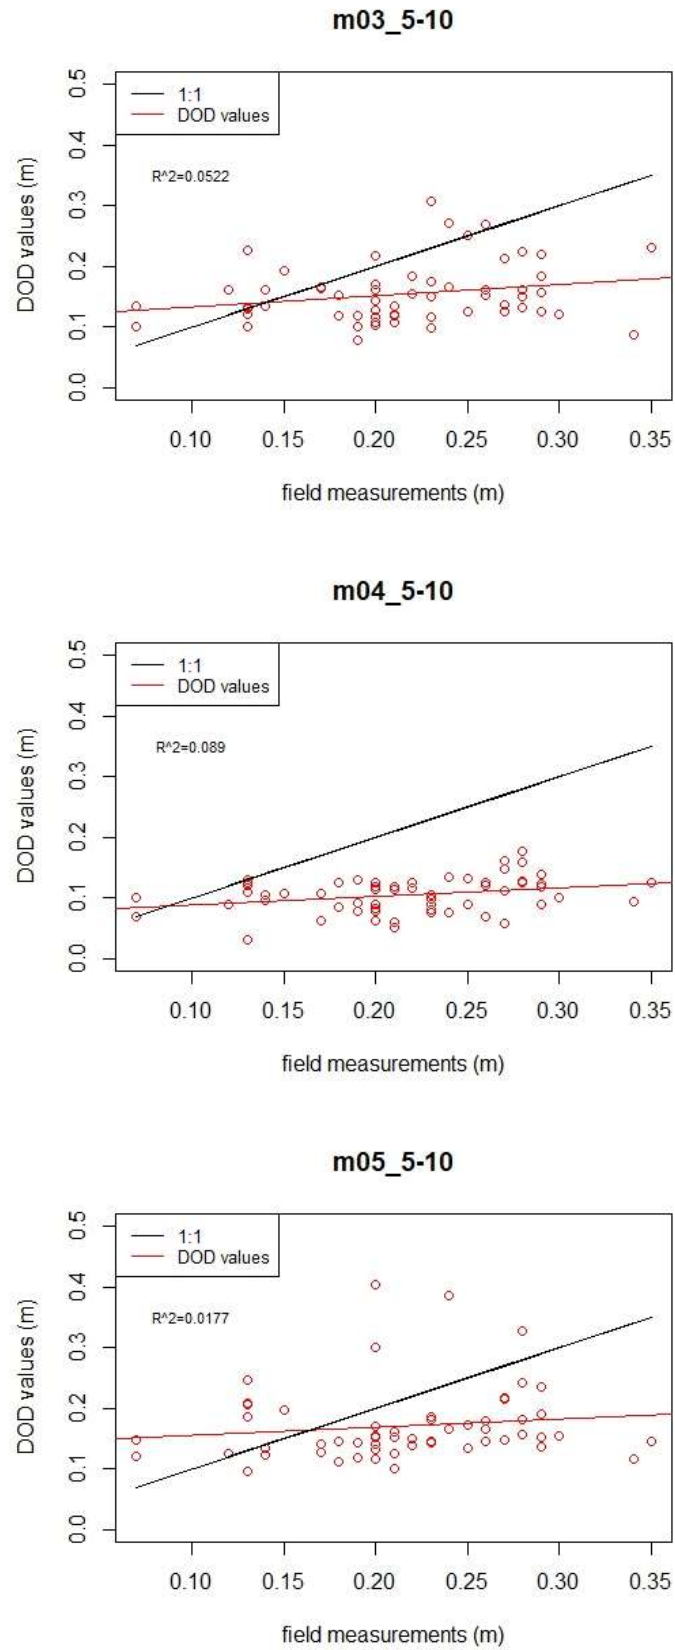

Figure S29. (Continue)

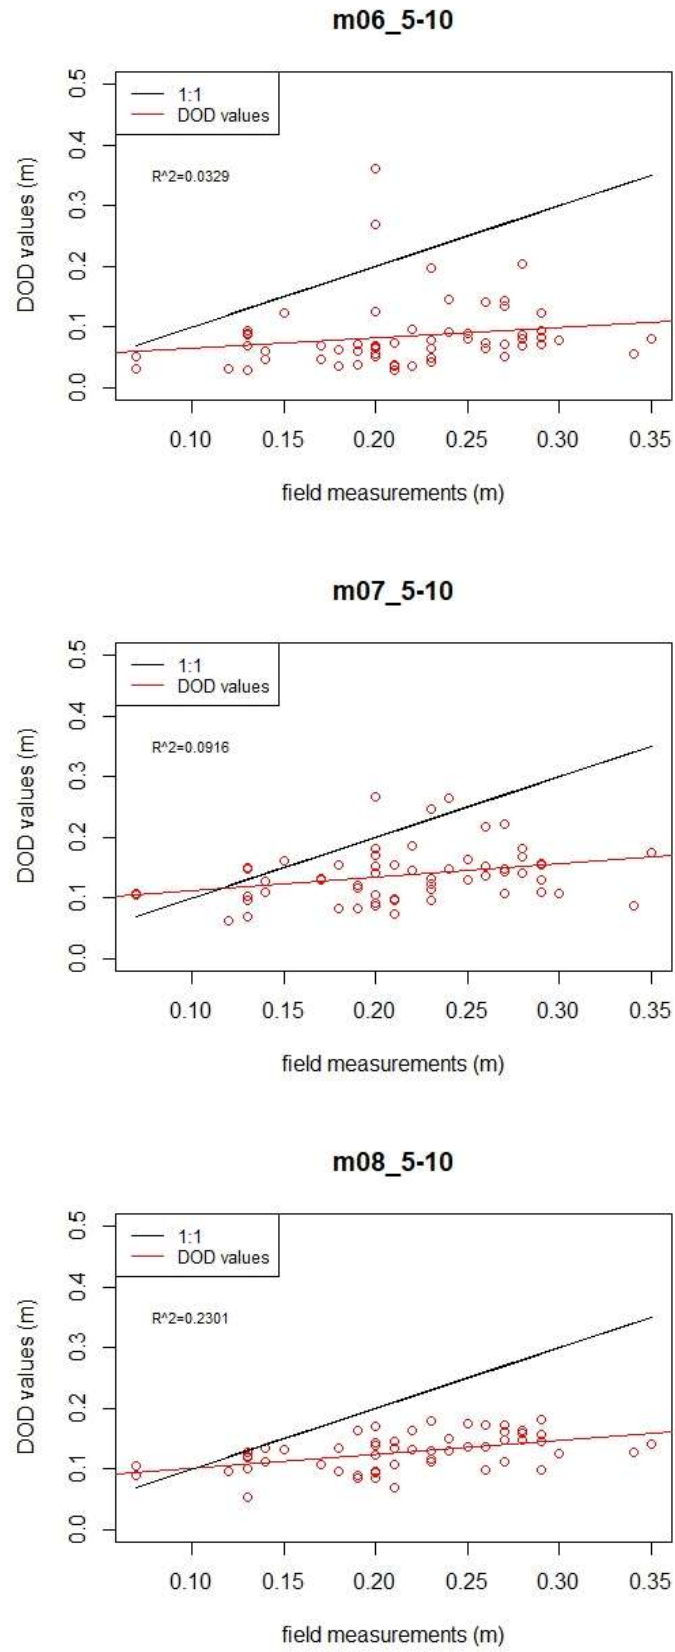

Figure S29. Linear regression and  $R^2$  value for  $DOD_{5-10}$  for all the eight missions compared to vegetation height values of GCPs. The red line is the regression line for the compared datasets, the black line represents the 1:1 pattern.

Table S78. Values of difference from field measurements for  $DOD_{5-10}$  for the eight missions at each point. Each column identifies the mission:  $m01_{5-10}$  represents data extracted from  $DOD_{5-10}$  of mission 1, and so on. Values expressed in meters. Negative values underestimate canopy height, positive values overestimate canopy height. The average RMSE defining the output for each mission is shown at the bottom of the respective column.

| Point Id | $m01_{5-10}$ | $m02_{5-10}$ | $m03_{5-10}$ | $m04_{5-10}$ | $m05_{5-10}$ | $m06_{5-10}$ | $m07_{5-10}$ | $m08_{5-10}$ |
|----------|--------------|--------------|--------------|--------------|--------------|--------------|--------------|--------------|
| C1       | 0.09         | -0.03        | 0.03         | 0.00         | -            | -            | -            | -            |
| C2       | 0.10         | -0.02        | 0.06         | 0.03         | -            | -            | -            | -            |
| C3       | 0.05         | -0.02        | 0.00         | -0.01        | -            | -            | -            | -            |
| C4       | 0.02         | -0.03        | -0.03        | -0.02        | -            | -            | -            | -            |
| R2       | -0.06        | -0.15        | -0.06        | -0.10        | -0.04        | -0.14        | -0.10        | -0.08        |
| R3       | -0.06        | -0.13        | -0.03        | -0.14        | -0.05        | -0.14        | -0.06        | -0.10        |
| R4       | -0.01        | -0.11        | 0.00         | -0.10        | -0.04        | -0.10        | -0.06        | -0.08        |
| R5       | 0.01         | -0.09        | 0.04         | -0.03        | 0.01         | -0.09        | -0.06        | -0.02        |
| R6       | -0.03        | -0.15        | -0.08        | -0.12        | -0.08        | -0.15        | -0.11        | -0.11        |
| R7       | -0.06        | -0.16        | -0.09        | -0.11        | -0.07        | -0.15        | -0.11        | -0.10        |
| R8       | -0.06        | -0.16        | -0.10        | -0.12        | -0.07        | -0.14        | -0.11        | -0.12        |
| R9       | -0.03        | -0.15        | -0.07        | -0.10        | -0.05        | -0.13        | -0.07        | -0.11        |
| R10      | -0.06        | -0.17        | -0.06        | -0.15        | -0.09        | -0.18        | -0.11        | -0.11        |
| R11      | 0.00         | -0.16        | -0.06        | -0.10        | 0.05         | -0.08        | -0.11        | -0.12        |
| R12      | -0.13        | -0.25        | -0.18        | -0.20        | -0.15        | -0.22        | -0.19        | -0.18        |
| R13      | -0.10        | -0.19        | -0.11        | -0.14        | -0.09        | -0.19        | -0.13        | -0.12        |
| R14      | -0.09        | -0.13        | -0.07        | -0.16        | -0.07        | -0.15        | -0.09        | -0.11        |
| R15      | -0.20        | -0.26        | -0.12        | -0.23        | -0.20        | -0.27        | -0.18        | -0.21        |
| R16      | -0.09        | -0.17        | -0.13        | -0.16        | -0.08        | -0.16        | -0.12        | -0.11        |
| R17      | -0.06        | 0.00         | 0.01         | -0.19        | -0.08        | -0.12        | -0.04        | -0.16        |
| R18      | -0.15        | -0.22        | -0.15        | -0.21        | -0.12        | -0.22        | -0.16        | -0.16        |
| R19      | -0.11        | -0.18        | -0.13        | -0.16        | -0.12        | -0.20        | -0.12        | -0.12        |
| R20      | -0.09        | -0.14        | -0.11        | -0.17        | -0.06        | -0.17        | -0.14        | -0.11        |
| R21      | -0.07        | -0.17        | -0.13        | -0.15        | -0.04        | -0.15        | -0.10        | -0.11        |
| R22      | -0.11        | -0.21        | -0.13        | -0.15        | -0.10        | -0.21        | -0.10        | -0.13        |
| R23      | -0.06        | -0.18        | -0.06        | -0.10        | -0.07        | -0.18        | -0.08        | -0.09        |
| R24      | -0.07        | -0.12        | -0.06        | -0.11        | -0.05        | -0.14        | -0.05        | -0.10        |
| R25      | -0.04        | -0.15        | -0.08        | -0.10        | -0.05        | -0.14        | -0.05        | -0.06        |
| R26      | 0.18         | 0.23         | 0.02         | -0.08        | 0.20         | 0.16         | 0.07         | -0.06        |
| R27      | -0.07        | -0.13        | -0.06        | -0.11        | -0.06        | -0.13        | -0.02        | -0.06        |
| R28      | -0.02        | -0.10        | 0.08         | -0.13        | -0.05        | -0.03        | 0.02         | -0.05        |
| R29      | -0.08        | -0.17        | -0.08        | -0.13        | -0.09        | -0.17        | -0.12        | -0.10        |
| R30      | -0.10        | -0.16        | -0.11        | -0.14        | -0.09        | -0.19        | -0.12        | -0.12        |
| R31      | -0.10        | -0.20        | -0.10        | -0.14        | -0.12        | -0.20        | -0.11        | -0.09        |
| R32      | -0.13        | -0.17        | -0.09        | -0.16        | -0.11        | -0.18        | -0.12        | -0.10        |
| R33      | -0.09        | -0.18        | -0.10        | -0.09        | -0.06        | -0.17        | -0.11        | -0.07        |
| R34      | -0.11        | -0.20        | -0.12        | -0.12        | -0.12        | -0.19        | -0.10        | -0.12        |
| R35      | -0.04        | -0.13        | -0.13        | -0.12        | -0.05        | -0.13        | -0.13        | -0.11        |
| R36      | -0.03        | -0.17        | -0.15        | -0.15        | -0.04        | -0.20        | -0.14        | -0.13        |
| R37      | -0.06        | -0.15        | -0.07        | -0.09        | -0.05        | -0.13        | -0.03        | -0.08        |
| R38      | -0.03        | -0.12        | 0.03         | -0.11        | 0.14         | -0.10        | 0.02         | -0.09        |
| R39      | -0.12        | -0.22        | -0.13        | -0.15        | -0.14        | -0.22        | -0.16        | -0.15        |
| R40      | -0.09        | -0.13        | -0.04        | -0.10        | -0.08        | -0.13        | -0.03        | -0.06        |
| R41      | -0.10        | -0.16        | -0.09        | -0.15        | -0.09        | -0.17        | -0.14        | -0.14        |
| R42      | -0.04        | -0.09        | -0.09        | -0.08        | -0.03        | -0.08        | -0.10        | -0.03        |
| R43      | -0.24        | -0.29        | -0.25        | -0.25        | -0.22        | -0.29        | -0.25        | -0.21        |
| R44      | -0.05        | -0.12        | -0.11        | -0.06        | -0.05        | -0.12        | -0.07        | -0.03        |
| R45      | -0.12        | -0.18        | -0.17        | -0.20        | -0.15        | -0.20        | -0.18        | -0.19        |
| R46      | -0.04        | -0.12        | -0.01        | -0.11        | -0.04        | -0.12        | -0.04        | -0.06        |
| R47      | -0.06        | -0.13        | -0.03        | -0.06        | -0.07        | -0.12        | -0.02        | -0.04        |
| R48      | 0.00         | -0.11        | 0.00         | -0.06        | -0.03        | -0.10        | -0.04        | -0.06        |
| R49      | 0.01         | -0.10        | 0.00         | -0.04        | 0.00         | -0.09        | -0.03        | -0.01        |
| R50      | 0.00         | -0.08        | 0.02         | -0.04        | -0.02        | -0.08        | -0.01        | -0.03        |
| R51      | 1.15         | -0.04        | 0.04         | -0.04        | 0.05         | -0.03        | 0.01         | -0.02        |
| R52      | 0.08         | -0.05        | -0.01        | 0.00         | 0.07         | -0.06        | 0.02         | 0.00         |

|          |       |       |       |       |       |       |       |       |
|----------|-------|-------|-------|-------|-------|-------|-------|-------|
| R53      | -0.09 | -0.18 | 0.00  | -0.12 | -0.12 | -0.17 | -0.09 | -0.08 |
| R54      | -0.03 | -0.01 | -0.04 | -0.08 | 0.10  | 0.07  | -0.05 | -0.06 |
| R55      | -0.04 | -0.19 | -0.07 | -0.17 | -0.10 | -0.21 | -0.13 | -0.13 |
| R56      | 0.12  | -0.05 | 0.10  | -0.01 | 0.12  | -0.04 | 0.02  | -0.01 |
| PROMEDIO | -0.04 | -0.14 | -0.07 | -0.12 | -0.05 | -0.14 | -0.08 | -0.09 |
| MEDIANA  | -0.06 | -0.15 | -0.07 | -0.12 | -0.06 | -0.14 | -0.10 | -0.10 |
| RMSE     | 0.174 | 0.153 | 0.092 | 0.126 | 0.094 | 0.157 | 0.104 | 0.106 |

Table S79. Field values of vegetation height measured at GCPs ('field' column) and values extracted from DOD<sub>5-15</sub> for the eight missions. For each point corresponding specie ('spp' column) is also reported. Each column identifies the mission: m01<sub>5-15</sub> represents data extracted from DOD<sub>5-15</sub> of mission 1, and so on. Values expressed in meters.

| Point Id | spp                    | field | m01 <sub>5-15</sub> | m02 <sub>5-15</sub> | m03 <sub>5-15</sub> | m04 <sub>5-15</sub> | m05 <sub>5-15</sub> | m06 <sub>5-15</sub> | m07 <sub>5-15</sub> | m08 <sub>5-15</sub> |
|----------|------------------------|-------|---------------------|---------------------|---------------------|---------------------|---------------------|---------------------|---------------------|---------------------|
| C1       | Salicornia             | 0.07  | 0.16                | 0.04                | 0.10                | 0.07                | -                   | -                   | -                   | -                   |
| C2       | Salicornia             | 0.07  | 0.17                | 0.05                | 0.13                | 0.10                | -                   | -                   | -                   | -                   |
| C3       | Salicornia             | 0.13  | 0.19                | 0.11                | 0.13                | 0.13                | -                   | -                   | -                   | -                   |
| C4       | Salicornia             | 0.13  | 0.14                | 0.10                | 0.10                | 0.11                | -                   | -                   | -                   | -                   |
| R2       | Salicornia             | 0.18  | 0.12                | 0.03                | 0.11                | 0.08                | 0.14                | 0.03                | 0.08                | 0.10                |
| R3       | Salicornia             | 0.2   | 0.14                | 0.07                | 0.17                | 0.07                | 0.15                | 0.07                | 0.14                | 0.10                |
| R4       | Salicornia             | 0.13  | 0.12                | 0.02                | 0.13                | 0.03                | 0.10                | 0.03                | 0.07                | 0.05                |
| R5       | Salicornia             | 0.12  | 0.14                | 0.03                | 0.15                | 0.09                | 0.12                | 0.03                | 0.07                | 0.10                |
| R6       | Salicornia             | 0.2   | 0.16                | 0.05                | 0.12                | 0.08                | 0.11                | 0.05                | 0.08                | 0.10                |
| R7       | Salicornia             | 0.19  | 0.13                | 0.03                | 0.11                | 0.08                | 0.12                | 0.04                | 0.09                | 0.09                |
| R8       | Salicornia             | 0.2   | 0.13                | 0.04                | 0.10                | 0.08                | 0.13                | 0.06                | 0.09                | 0.08                |
| R9       | Salicornia             | 0.19  | 0.15                | 0.04                | 0.11                | 0.09                | 0.14                | 0.06                | 0.12                | 0.09                |
| R10      | Salicornia             | 0.23  | 0.17                | 0.07                | 0.17                | 0.08                | 0.14                | 0.05                | 0.12                | 0.12                |
| R11      | Salicornia             | 0.28  | 0.34                | 0.15                | 0.22                | 0.21                | 0.12                | 0.18                | 0.19                | 0.20                |
| R12      | Salicornia             | 0.3   | 0.17                | 0.06                | 0.12                | 0.10                | 0.15                | 0.08                | 0.10                | 0.12                |
| R13      | Sarcocornia            | 0.23  | 0.13                | 0.04                | 0.12                | 0.09                | 0.14                | 0.04                | 0.09                | 0.12                |
| R14      | Sarcocornia            | 0.24  | 0.15                | 0.10                | 0.15                | 0.07                | 0.17                | 0.10                | 0.15                | 0.11                |
| R15      | Sarcocornia+Sporobolus | 0.35  | 0.14                | 0.09                | 0.22                | 0.12                | 0.15                | 0.08                | 0.17                | 0.14                |
| R16      | Sarcocornia            | 0.25  | 0.19                | 0.12                | 0.14                | 0.10                | 0.17                | 0.08                | 0.15                | 0.15                |
| R17      | Sarcocornia            | 0.26  | 0.20                | 0.31                | 0.29                | 0.07                | 0.18                | 0.32                | 0.26                | 0.10                |
| R18      | Sarcocornia            | 0.27  | 0.13                | 0.05                | 0.12                | 0.06                | 0.14                | 0.05                | 0.10                | 0.11                |
| R19      | Sarcocornia            | 0.27  | 0.15                | 0.09                | 0.15                | 0.11                | 0.13                | 0.06                | 0.17                | 0.14                |
| R20      | Sarcocornia            | 0.29  | 0.23                | 0.17                | 0.19                | 0.14                | 0.23                | 0.11                | 0.16                | 0.16                |
| R21      | Sarcocornia            | 0.23  | 0.17                | 0.06                | 0.10                | 0.08                | 0.17                | 0.08                | 0.13                | 0.12                |
| R22      | Sarcocornia            | 0.28  | 0.18                | 0.07                | 0.15                | 0.12                | 0.18                | 0.08                | 0.17                | 0.14                |
| R23      | Sarcocornia            | 0.22  | 0.15                | 0.04                | 0.15                | 0.12                | 0.15                | 0.04                | 0.14                | 0.13                |
| R24      | Sarcocornia            | 0.27  | 0.19                | 0.08                | 0.22                | 0.13                | 0.22                | 0.13                | 0.21                | 0.16                |
| R25      | Sarcocornia            | 0.21  | 0.18                | 0.06                | 0.13                | 0.11                | 0.16                | 0.07                | 0.14                | 0.15                |
| R26      | Sarcocornia            | 0.2   | 0.38                | 0.40                | 0.20                | 0.16                | 0.40                | 0.09                | 0.30                | 0.14                |
| R27      | Sarcocornia            | 0.2   | 0.13                | 0.06                | 0.14                | 0.09                | 0.14                | 0.06                | 0.18                | 0.14                |
| R28      | Sarcocornia            | 0.23  | 0.15                | 0.13                | 0.31                | 0.21                | 0.16                | 0.21                | 0.26                | 0.13                |
| R29      | Sarcocornia            | 0.23  | 0.17                | 0.10                | 0.17                | 0.10                | 0.14                | 0.07                | 0.11                | 0.13                |
| R30      | Sarcocornia            | 0.26  | 0.16                | 0.09                | 0.15                | 0.12                | 0.16                | 0.08                | 0.13                | 0.14                |
| R31      | Sarcocornia            | 0.26  | 0.16                | 0.06                | 0.13                | 0.11                | 0.15                | 0.06                | 0.12                | 0.18                |
| R32      | Sarcocornia            | 0.21  | 0.08                | 0.04                | 0.09                | 0.05                | 0.07                | 0.03                | 0.09                | 0.11                |
| R33      | Sarcocornia            | 0.21  | 0.13                | 0.04                | 0.11                | 0.12                | 0.15                | 0.04                | 0.10                | 0.13                |
| R34      | Sarcocornia            | 0.28  | 0.17                | 0.08                | 0.15                | 0.16                | 0.15                | 0.09                | 0.19                | 0.16                |
| R35      | Sarcocornia            | 0.27  | 0.24                | 0.14                | 0.14                | 0.14                | 0.23                | 0.14                | 0.15                | 0.16                |
| R36      | Sarcocornia            | 0.28  | 0.24                | 0.10                | 0.13                | 0.13                | 0.25                | 0.09                | 0.15                | 0.15                |
| R37      | Sarcocornia            | 0.2   | 0.15                | 0.07                | 0.12                | 0.12                | 0.16                | 0.06                | 0.16                | 0.12                |

|     |                        |      |      |      |      |      |      |      |      |      |
|-----|------------------------|------|------|------|------|------|------|------|------|------|
| R38 | Sarcocornia            | 0.24 | 0.30 | 0.13 | 0.17 | 0.14 | 0.25 | 0.14 | 0.24 | 0.15 |
| R39 | Sarcocornia            | 0.29 | 0.18 | 0.07 | 0.14 | 0.14 | 0.16 | 0.07 | 0.12 | 0.15 |
| R40 | Sarcocornia            | 0.22 | 0.13 | 0.08 | 0.19 | 0.12 | 0.14 | 0.10 | 0.17 | 0.16 |
| R41 | Sarcocornia            | 0.21 | 0.11 | 0.05 | 0.12 | 0.06 | 0.13 | 0.04 | 0.08 | 0.07 |
| R42 | Sarcocornia            | 0.2  | 0.15 | 0.12 | 0.10 | 0.12 | 0.18 | 0.12 | 0.12 | 0.17 |
| R43 | Sarcocornia+Sporobolus | 0.34 | 0.10 | 0.05 | 0.08 | 0.09 | 0.10 | 0.05 | 0.08 | 0.13 |
| R44 | Sarcocornia            | 0.19 | 0.14 | 0.07 | 0.08 | 0.13 | 0.14 | 0.08 | 0.12 | 0.16 |
| R45 | Sarcocornia            | 0.29 | 0.17 | 0.12 | 0.14 | 0.09 | 0.14 | 0.10 | 0.11 | 0.10 |
| R46 | Salicornia             | 0.17 | 0.13 | 0.05 | 0.17 | 0.06 | 0.13 | 0.05 | 0.14 | 0.11 |
| R47 | Salicornia             | 0.18 | 0.12 | 0.05 | 0.16 | 0.13 | 0.11 | 0.06 | 0.14 | 0.14 |
| R48 | Salicornia             | 0.17 | 0.18 | 0.05 | 0.17 | 0.11 | 0.15 | 0.07 | 0.14 | 0.10 |
| R49 | Salicornia             | 0.14 | 0.12 | 0.04 | 0.13 | 0.10 | 0.14 | 0.05 | 0.10 | 0.13 |
| R50 | Salicornia             | 0.14 | 0.14 | 0.06 | 0.16 | 0.11 | 0.13 | 0.06 | 0.13 | 0.11 |
| R51 | Salicornia             | 0.15 | 1.30 | 0.12 | 0.19 | 0.11 | 0.20 | 0.11 | 0.16 | 0.14 |
| R52 | Salicornia             | 0.13 | 0.20 | 0.08 | 0.13 | 0.13 | 0.20 | 0.07 | 0.15 | 0.13 |
| R53 | Sarcocornia            | 0.25 | 0.17 | 0.08 | 0.23 | 0.13 | 0.14 | 0.08 | 0.17 | 0.17 |
| R54 | Sarcocornia            | 0.2  | 0.18 | 0.20 | 0.16 | 0.12 | 0.32 | 0.20 | 0.16 | 0.13 |
| R55 | Sarcocornia            | 0.29 | 0.26 | 0.12 | 0.22 | 0.12 | 0.21 | 0.09 | 0.16 | 0.16 |
| R56 | Sarcocornia            | 0.13 | 0.25 | 0.02 | 0.20 | 0.12 | 0.24 | 0.12 | 0.16 | 0.11 |

**m01\_5-15**

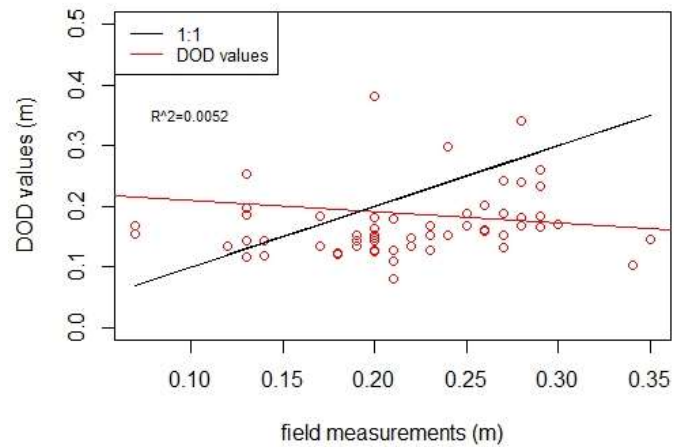

**m02\_5-15**

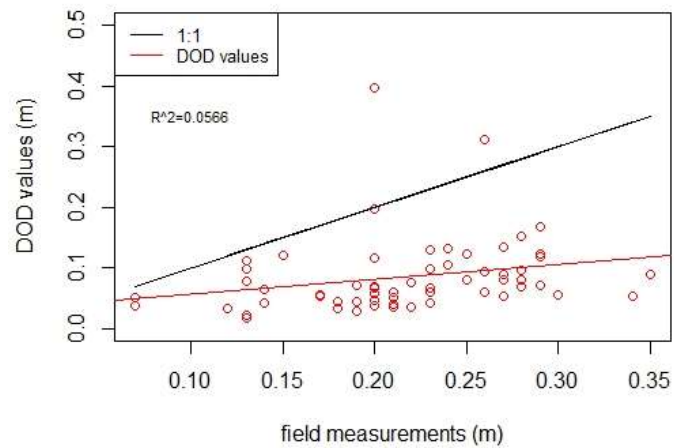

Figure S30. (Continue)

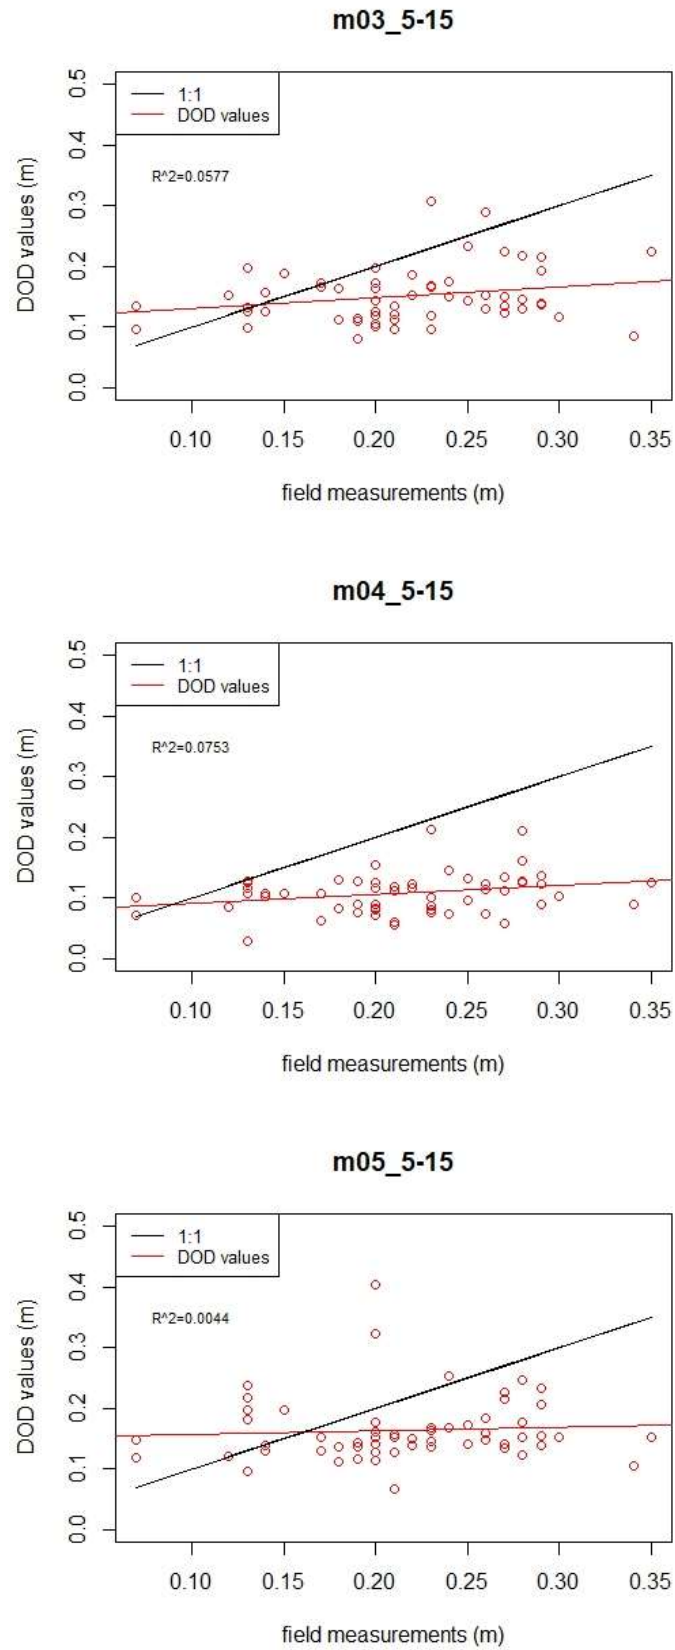

Figure S30. (Continue)

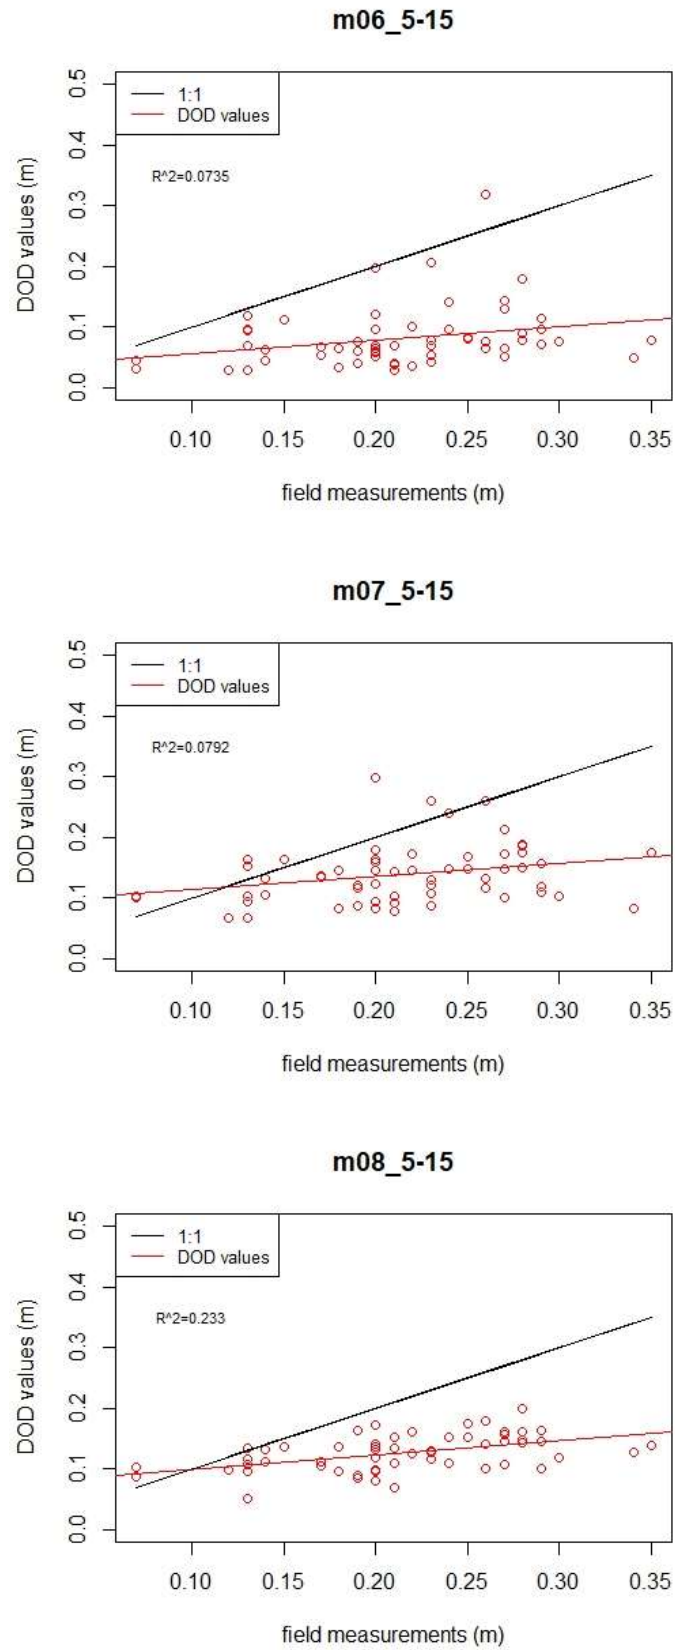

Figure S30. Linear regression and  $R^2$  value for  $DOD_{5-15}$  for all the eight missions compared to vegetation height values of GCPs. The red line is the regression line for the compared datasets, the black line represents the 1:1 pattern.

*Table S80. Values of difference from field measurements for DOD<sub>5-15</sub> for the eight missions at each point. Each column identifies the mission: m01<sub>5-15</sub> represents data extracted from DOD<sub>5-15</sub> of mission 1, and so on. Values expressed in meters. Negative values underestimate canopy height, positive values overestimate canopy height. The average RMSE defining the output for each mission is shown at the bottom of the respective column.*

| Point Id | m01 <sub>5-15</sub> | m02 <sub>5-15</sub> | m03 <sub>5-15</sub> | m04 <sub>5-15</sub> | m05 <sub>5-15</sub> | m06 <sub>5-15</sub> | m07 <sub>5-15</sub> | m08 <sub>5-15</sub> |
|----------|---------------------|---------------------|---------------------|---------------------|---------------------|---------------------|---------------------|---------------------|
| C1       | 0.09                | -0.03               | 0.03                | 0.00                | -                   | -                   | -                   | -                   |
| C2       | 0.10                | -0.02               | 0.06                | 0.03                | -                   | -                   | -                   | -                   |
| C3       | 0.06                | -0.02               | 0.00                | 0.00                | -                   | -                   | -                   | -                   |
| C4       | 0.01                | -0.03               | -0.03               | -0.02               | -                   | -                   | -                   | -                   |
| R2       | -0.06               | -0.15               | -0.07               | -0.10               | -0.04               | -0.15               | -0.10               | -0.08               |
| R3       | -0.06               | -0.13               | -0.03               | -0.13               | -0.05               | -0.13               | -0.06               | -0.10               |
| R4       | -0.01               | -0.11               | 0.00                | -0.10               | -0.03               | -0.10               | -0.06               | -0.08               |
| R5       | 0.02                | -0.09               | 0.03                | -0.03               | 0.00                | -0.09               | -0.05               | -0.02               |
| R6       | -0.04               | -0.15               | -0.08               | -0.12               | -0.09               | -0.15               | -0.12               | -0.10               |
| R7       | -0.06               | -0.16               | -0.08               | -0.11               | -0.07               | -0.15               | -0.10               | -0.10               |
| R8       | -0.07               | -0.16               | -0.10               | -0.12               | -0.07               | -0.14               | -0.11               | -0.12               |
| R9       | -0.04               | -0.15               | -0.08               | -0.10               | -0.05               | -0.13               | -0.07               | -0.10               |
| R10      | -0.06               | -0.16               | -0.06               | -0.15               | -0.09               | -0.18               | -0.11               | -0.11               |
| R11      | 0.06                | -0.13               | -0.06               | -0.07               | -0.16               | -0.10               | -0.09               | -0.08               |
| R12      | -0.13               | -0.24               | -0.18               | -0.20               | -0.15               | -0.22               | -0.20               | -0.18               |
| R13      | -0.10               | -0.19               | -0.11               | -0.14               | -0.09               | -0.19               | -0.14               | -0.11               |
| R14      | -0.09               | -0.14               | -0.09               | -0.17               | -0.07               | -0.14               | -0.09               | -0.13               |
| R15      | -0.21               | -0.26               | -0.13               | -0.23               | -0.20               | -0.27               | -0.18               | -0.21               |
| R16      | -0.06               | -0.13               | -0.11               | -0.15               | -0.08               | -0.17               | -0.10               | -0.10               |
| R17      | -0.06               | 0.05                | 0.03                | -0.19               | -0.08               | 0.06                | 0.00                | -0.16               |
| R18      | -0.14               | -0.22               | -0.15               | -0.21               | -0.13               | -0.22               | -0.17               | -0.16               |
| R19      | -0.12               | -0.18               | -0.12               | -0.16               | -0.14               | -0.21               | -0.10               | -0.13               |
| R20      | -0.06               | -0.12               | -0.10               | -0.15               | -0.06               | -0.18               | -0.13               | -0.13               |
| R21      | -0.06               | -0.17               | -0.13               | -0.15               | -0.06               | -0.15               | -0.10               | -0.11               |
| R22      | -0.10               | -0.21               | -0.13               | -0.16               | -0.10               | -0.20               | -0.11               | -0.14               |
| R23      | -0.07               | -0.18               | -0.07               | -0.10               | -0.07               | -0.18               | -0.08               | -0.09               |
| R24      | -0.08               | -0.19               | -0.05               | -0.14               | -0.05               | -0.14               | -0.06               | -0.11               |
| R25      | -0.03               | -0.15               | -0.08               | -0.10               | -0.05               | -0.14               | -0.07               | -0.06               |
| R26      | 0.18                | 0.20                | 0.00                | -0.04               | 0.20                | -0.11               | 0.10                | -0.06               |
| R27      | -0.07               | -0.14               | -0.06               | -0.11               | -0.06               | -0.14               | -0.02               | -0.06               |
| R28      | -0.08               | -0.10               | 0.08                | -0.02               | -0.07               | -0.02               | 0.03                | -0.10               |
| R29      | -0.06               | -0.13               | -0.06               | -0.13               | -0.09               | -0.16               | -0.12               | -0.10               |
| R30      | -0.10               | -0.17               | -0.11               | -0.14               | -0.10               | -0.18               | -0.13               | -0.12               |
| R31      | -0.10               | -0.20               | -0.13               | -0.15               | -0.11               | -0.20               | -0.14               | -0.08               |
| R32      | -0.13               | -0.17               | -0.12               | -0.16               | -0.14               | -0.18               | -0.12               | -0.10               |
| R33      | -0.08               | -0.17               | -0.10               | -0.09               | -0.06               | -0.17               | -0.11               | -0.08               |
| R34      | -0.11               | -0.20               | -0.13               | -0.12               | -0.13               | -0.19               | -0.09               | -0.12               |
| R35      | -0.03               | -0.13               | -0.13               | -0.13               | -0.04               | -0.13               | -0.12               | -0.11               |
| R36      | -0.04               | -0.18               | -0.15               | -0.15               | -0.03               | -0.19               | -0.13               | -0.13               |
| R37      | -0.05               | -0.13               | -0.08               | -0.08               | -0.04               | -0.14               | -0.04               | -0.08               |
| R38      | 0.06                | -0.11               | -0.07               | -0.10               | 0.01                | -0.10               | 0.00                | -0.09               |
| R39      | -0.11               | -0.22               | -0.15               | -0.15               | -0.13               | -0.22               | -0.17               | -0.14               |
| R40      | -0.09               | -0.14               | -0.03               | -0.10               | -0.08               | -0.12               | -0.05               | -0.06               |
| R41      | -0.10               | -0.16               | -0.09               | -0.15               | -0.08               | -0.17               | -0.13               | -0.14               |
| R42      | -0.05               | -0.08               | -0.10               | -0.08               | -0.02               | -0.08               | -0.08               | -0.03               |
| R43      | -0.24               | -0.29               | -0.26               | -0.25               | -0.24               | -0.29               | -0.26               | -0.21               |
| R44      | -0.05               | -0.12               | -0.11               | -0.06               | -0.05               | -0.11               | -0.07               | -0.03               |
| R45      | -0.12               | -0.17               | -0.15               | -0.20               | -0.15               | -0.19               | -0.18               | -0.19               |
| R46      | -0.04               | -0.12               | 0.00                | -0.11               | -0.04               | -0.12               | -0.03               | -0.06               |
| R47      | -0.06               | -0.13               | -0.02               | -0.05               | -0.07               | -0.12               | -0.04               | -0.04               |
| R48      | 0.01                | -0.12               | 0.00                | -0.06               | -0.02               | -0.10               | -0.03               | -0.07               |
| R49      | -0.02               | -0.10               | -0.01               | -0.04               | 0.00                | -0.09               | -0.04               | -0.01               |
| R50      | 0.00                | -0.08               | 0.02                | -0.03               | -0.01               | -0.08               | -0.01               | -0.03               |
| R51      | 1.15                | -0.03               | 0.04                | -0.04               | 0.05                | -0.04               | 0.01                | -0.01               |
| R52      | 0.07                | -0.05               | -0.01               | 0.00                | 0.07                | -0.06               | 0.02                | 0.00                |

|          |       |       |       |       |       |       |       |       |
|----------|-------|-------|-------|-------|-------|-------|-------|-------|
| R53      | -0.08 | -0.17 | -0.02 | -0.12 | -0.11 | -0.17 | -0.08 | -0.08 |
| R54      | -0.02 | 0.00  | -0.04 | -0.08 | 0.12  | 0.00  | -0.04 | -0.07 |
| R55      | -0.03 | -0.17 | -0.07 | -0.17 | -0.08 | -0.20 | -0.13 | -0.13 |
| R56      | 0.12  | -0.11 | 0.07  | -0.01 | 0.11  | -0.01 | 0.03  | -0.02 |
| PROMEDIO | -0.03 | -0.14 | -0.07 | -0.12 | -0.06 | -0.14 | -0.08 | -0.10 |
| MEDIANA  | -0.06 | -0.15 | -0.08 | -0.12 | -0.07 | -0.14 | -0.09 | -0.10 |
| RMSE     | 0.173 | 0.152 | 0.093 | 0.124 | 0.096 | 0.155 | 0.105 | 0.107 |

Table S81. Resume of  $R^2$  and RMSE values for selected CHMs (corresponding to  $DOD_{1-5}$ ,  $DOD_{3-5}$ , and  $DOD_{5-5}$ ) of each mission (1-8). The resolution of each CHM is indicated by its respective subindex. RMSE is shown as the average [min, max].

| mission | $R^2$              |                    |                    | RMSE                 |                      |                      |
|---------|--------------------|--------------------|--------------------|----------------------|----------------------|----------------------|
|         | CHM <sub>0.2</sub> | CHM <sub>0.6</sub> | CHM <sub>0.9</sub> | CHM <sub>0.2</sub>   | CHM <sub>0.6</sub>   | CHM <sub>0.9</sub>   |
| 1       | 0.002              | 0.004              | 0.005              | 0.123 [0.002, 0.389] | 0.156 [0.001, 0.941] | 0.173 [0.000, 1.138] |
| 2       | 0.038              | 0.029              | 0.043              | 0.179 [0.005, 0.321] | 0.167 [0.009, 0.312] | 0.155 [0.004, 0.292] |
| 3       | 0.069              | 0.069              | 0.033              | 0.138 [0.019, 0.298] | 0.103 [0.006, 0.283] | 0.100 [0.001, 0.264] |
| 4       | 0.061              | 0.116              | 0.079              | 0.164 [0.013, 0.306] | 0.136 [0.000, 0.255] | 0.126 [0.001, 0.246] |
| 5       | 0.021              | 0.038              | 0.027              | 0.124 [0.008, 0.277] | 0.100 [0.002, 0.221] | 0.093 [0.000, 0.212] |
| 6       | 0.035              | 0.036              | 0.034              | 0.183 [0.006, 0.328] | 0.169 [0.014, 0.313] | 0.160 [0.009, 0.289] |
| 7       | 0.105              | 0.078              | 0.082              | 0.151 [0.003, 0.300] | 0.119 [0.001, 0.260] | 0.104 [0.000, 0.253] |
| 8       | 0.079              | 0.126              | 0.172              | 0.152 [0.033, 0.285] | 0.121 [0.016, 0.242] | 0.110 [0.004, 0.210] |

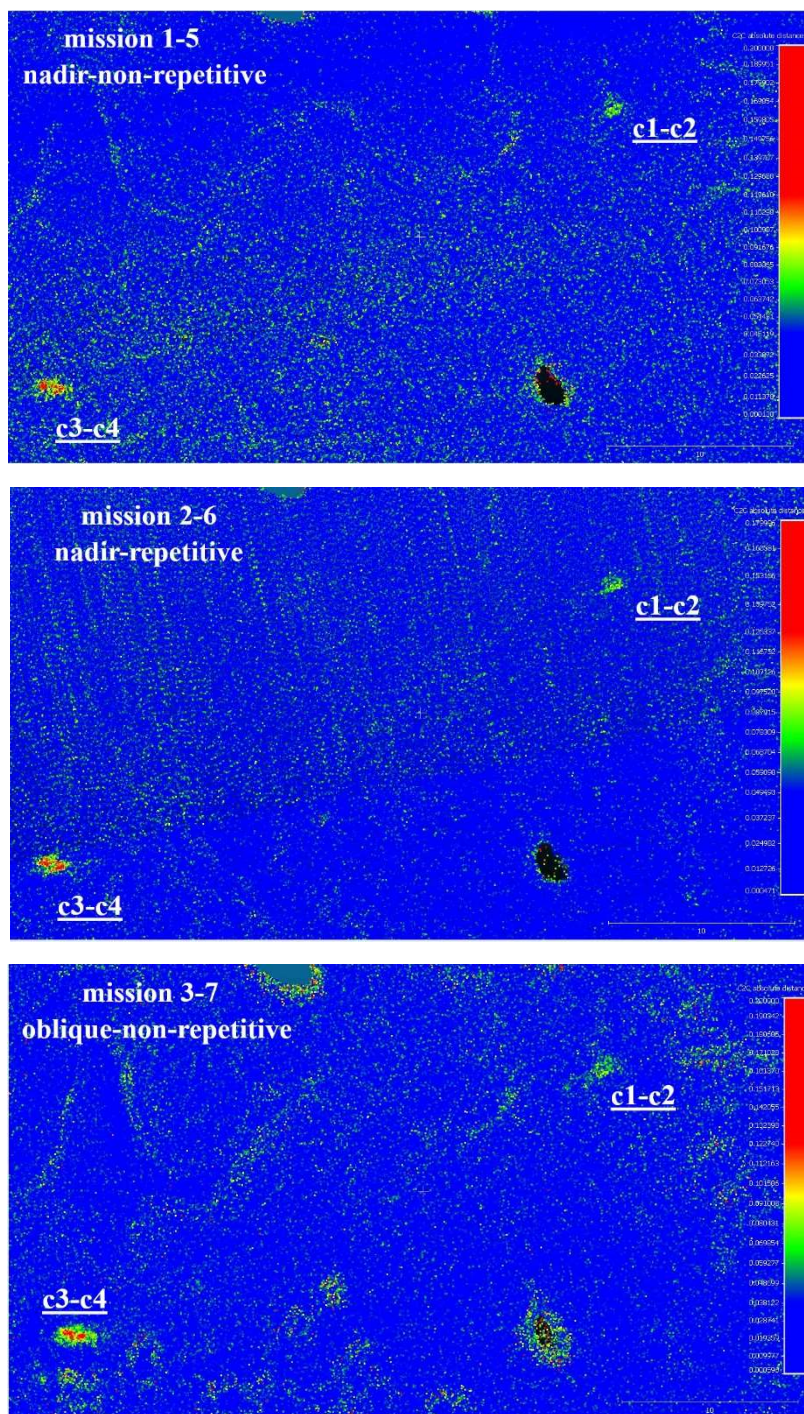

Figure S31. (Continue)

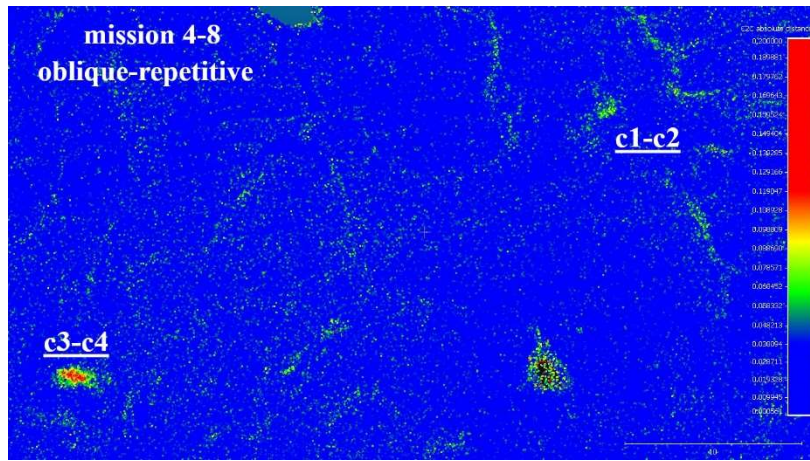

Figure S31. Outputs from contrasting pre- and post- pruning point clouds (method A) for the eight missions. Red and green spots identify the difference in elevation at the two sectors of peeled areas (c1-c2 and c3-c4).

Table S82. Values representing the distance between pre- and post-pruning point clouds estimated with the 'Compute cloud/cloud distance' tool of through CloudCompare (method A). Points selected from the identified area were averaged to estimate the reference value of elevation difference for each sector. Values are in meters.

| mission 1-5 |       | mission 2-6 |       | mission 3-7 |       | mission 4-8 |       |
|-------------|-------|-------------|-------|-------------|-------|-------------|-------|
| c1-c2       | c3-c4 | c1-c2       | c3-c4 | c1-c2       | c3-c4 | c1-c2       | c3-c4 |
| 0.099       | 0.118 | 0.107       | 0.115 | 0.089       | 0.088 | 0.097       | 0.091 |
| 0.092       | 0.092 | 0.095       | 0.105 | 0.069       | 0.144 | 0.075       | 0.075 |
| 0.077       | 0.135 | 0.069       | 0.123 | 0.084       | 0.128 | 0.063       | 0.092 |
| 0.089       | 0.120 | 0.095       | 0.109 | 0.070       | 0.100 | 0.085       | 0.100 |
| 0.071       | 0.116 | 0.083       | 0.127 | 0.085       | 0.094 | 0.089       | 0.107 |
| 0.080       | 0.107 | 0.091       | 0.123 | 0.052       | 0.135 | 0.084       | 0.106 |
| 0.082       | 0.110 | 0.068       | 0.101 | 0.075       | 0.115 | 0.072       | 0.126 |
| 0.061       | 0.128 | 0.098       | 0.088 | 0.061       | 0.138 | 0.050       | 0.098 |
| 0.078       | 0.184 | 0.077       | 0.148 | 0.095       | 0.114 | 0.074       | 0.151 |
| 0.074       | 0.148 | 0.090       | 0.172 | 0.098       | 0.107 | 0.067       | 0.134 |
| 0.063       | 0.129 | 0.088       | 0.116 | 0.061       | 0.137 | 0.059       | 0.111 |
| 0.075       | 0.101 | 0.069       | 0.112 | 0.068       | 0.147 | 0.090       | 0.110 |
| 0.104       | 0.083 | 0.080       | 0.160 | 0.061       | 0.146 | 0.065       | 0.106 |
| 0.074       | 0.139 | 0.083       | 0.131 | 0.086       | 0.116 | 0.067       | 0.105 |
| 0.067       | 0.126 | 0.063       | 0.166 | 0.068       | 0.104 | 0.075       | 0.109 |
| 0.081       | 0.112 | 0.094       | 0.109 | 0.055       | 0.115 | 0.055       | 0.130 |
| 0.074       | 0.118 | 0.077       | 0.109 | 0.068       | 0.097 | 0.063       | 0.116 |
| 0.098       | 0.110 | 0.089       | 0.098 | 0.075       | 0.122 | 0.079       | 0.140 |
| 0.066       | 0.112 | 0.069       | 0.116 | 0.071       | 0.101 | 0.061       | 0.089 |
| 0.061       | 0.082 | 0.068       | 0.115 | 0.059       | 0.096 | 0.061       | 0.111 |

Table S83. Resume of picked points. Average value was used as the reference one. Values are in meters.

|              |             | Min   | Max   | average      |
|--------------|-------------|-------|-------|--------------|
| Sector c1-c2 | Mission 1-5 | 0.061 | 0.104 | <b>0.078</b> |
|              | Mission 2-6 | 0.063 | 0.107 | <b>0.083</b> |
|              | Mission 3-7 | 0.052 | 0.098 | <b>0.073</b> |
|              | Mission 4-8 | 0.050 | 0.097 | <b>0.072</b> |
| Sector c3-c4 | Mission 1-5 | 0.082 | 0.184 | <b>0.119</b> |
|              | Mission 2-6 | 0.088 | 0.172 | <b>0.122</b> |
|              | Mission 3-7 | 0.088 | 0.147 | <b>0.114</b> |
|              | Mission 4-8 | 0.075 | 0.151 | <b>0.110</b> |

Table S84. Values of difference in elevation collected applying method B, from DSMs generated through Pix4Dmapper. Values were measured along the profile at the peeled areas and averaged to estimate the reference value of elevation difference for each sector. Values are expressed in meters.

| mission1-5 |       | mission2-6 |       | mission3-7 |       | mission4-8 |       |
|------------|-------|------------|-------|------------|-------|------------|-------|
| c1-c2      | c3-c4 | c1-c2      | c3-c4 | c1-c2      | c3-c4 | c1-c2      | c3-c4 |
| 0.078      | 0.092 | 0.063      | 0.085 | 0.176      | 0.196 | 0.064      | 0.099 |
| 0.078      | 0.097 | 0.064      | 0.09  | 0.175      | 0.197 | 0.063      | 0.101 |
| 0.077      | 0.102 | 0.063      | 0.095 | 0.177      | 0.2   | 0.064      | 0.106 |
| 0.075      | 0.109 | 0.064      | 0.099 | 0.178      | 0.21  | 0.064      | 0.108 |
| 0.074      | 0.118 | 0.065      | 0.103 | 0.176      | 0.218 | 0.066      | 0.114 |
| 0.073      | 0.127 | 0.065      | 0.107 | 0.176      | 0.219 | 0.066      | 0.116 |
| 0.074      | 0.133 | 0.067      | 0.109 | 0.179      | 0.225 | 0.068      | 0.12  |
| 0.073      | 0.136 | 0.067      | 0.111 | 0.182      | 0.232 | 0.068      | 0.122 |
| 0.073      | 0.14  | 0.065      | 0.114 | 0.182      | 0.235 | 0.068      | 0.125 |
| 0.075      | 0.139 | 0.066      | 0.112 | 0.183      | 0.238 | 0.069      | 0.128 |
| 0.073      | 0.14  | 0.067      | 0.118 | 0.187      | 0.239 | 0.069      | 0.131 |
| 0.073      | 0.139 | 0.066      | 0.119 | 0.181      | 0.241 | 0.068      | 0.135 |
| 0.073      | 0.137 | 0.064      | 0.12  | 0.187      | 0.243 | 0.068      | 0.135 |
| 0.073      | 0.136 | 0.063      | 0.12  | 0.185      | 0.241 | 0.068      | 0.133 |
| 0.076      | 0.131 | 0.064      | 0.123 | 0.187      | 0.242 | 0.068      | 0.135 |

Table S85. Resume of elevation difference values collected from method B application on Pix4Dmapper DSMs.

|              |             | Min   | Max   | average |
|--------------|-------------|-------|-------|---------|
| Sector c1-c2 | Mission 1-5 | 0.073 | 0.078 | 0.075   |
|              | Mission 2-6 | 0.063 | 0.067 | 0.065   |
|              | Mission 3-7 | 0.175 | 0.187 | 0.181   |
|              | Mission 4-8 | 0.063 | 0.069 | 0.067   |
| Sector c3-c4 | Mission 1-5 | 0.092 | 0.14  | 0.125   |
|              | Mission 2-6 | 0.085 | 0.123 | 0.108   |
|              | Mission 3-7 | 0.196 | 0.243 | 0.225   |
|              | Mission 4-8 | 0.099 | 0.135 | 0.121   |

Table S86. Values of difference in elevation collected applying method B, from 1-point-spacing-DSMs generated through LiDAR processing. Values were measured along the profile at the peeled areas and averaged to estimate the reference value of elevation difference for each sector. Values are expressed in meters.

| mission1-5 |       | mission2-6 |       | mission3-7 |       | mission4-8 |       |
|------------|-------|------------|-------|------------|-------|------------|-------|
| c1-c2      | c3-c4 | c1-c2      | c3-c4 | c1-c2      | c3-c4 | c1-c2      | c3-c4 |
| 0.076      | 0.091 | 0.085      | 0.11  | 0.073      | 0.088 | 0.083      | 0.118 |
| 0.065      | 0.114 | 0.085      | 0.116 | 0.074      | 0.068 | 0.107      | 0.096 |
| 0.058      | 0.176 | 0.08       | 0.122 | 0.077      | 0.074 | 0.068      | 0.12  |
| 0.056      | 0.179 | 0.079      | 0.124 | 0.077      | 0.137 | 0.054      | 0.15  |
| 0.055      | 0.139 | 0.079      | 0.128 | 0.095      | 0.132 | 0.042      | 0.139 |
| 0.067      | 0.116 | 0.078      | 0.132 | 0.069      | 0.148 | 0.069      | 0.109 |
| 0.069      | 0.124 | 0.078      | 0.133 | 0.034      | 0.101 | 0.058      | 0.13  |
| 0.076      | 0.144 | 0.076      | 0.136 | 0.076      | 0.118 | 0.065      | 0.128 |
| 0.08       | 0.183 | 0.074      | 0.13  | 0.058      | 0.156 | 0.053      | 0.121 |
| 0.068      | 0.186 | 0.072      | 0.125 | 0.042      | 0.147 | 0.055      | 0.128 |
| 0.066      | 0.165 | 0.07       | 0.13  | 0.049      | 0.139 | 0.065      | 0.139 |
| 0.07       | 0.156 | 0.068      | 0.128 | 0.046      | 0.151 | 0.045      | 0.097 |
| 0.084      | 0.149 | 0.074      | 0.135 | 0.054      | 0.15  | 0.08       | 0.134 |
| 0.09       | 0.17  | 0.079      | 0.133 | 0.069      | 0.153 | 0.09       | 0.087 |
| 0.079      | 0.19  | 0.081      | 0.133 | 0.081      | 0.133 | 0.076      | 0.148 |

Table S87. Resume of elevation difference values collected from method B application on 1-point-spacing-DSMs.

|              |            | min   | max   | average      |
|--------------|------------|-------|-------|--------------|
| sector c1-c2 | mission1-5 | 0.055 | 0.09  | <b>0.071</b> |
|              | mission2-6 | 0.068 | 0.085 | <b>0.077</b> |
|              | mission3-7 | 0.034 | 0.095 | <b>0.065</b> |
|              | mission4-8 | 0.042 | 0.107 | <b>0.067</b> |
| sector c3-c4 | mission1-5 | 0.091 | 0.19  | <b>0.152</b> |
|              | mission2-6 | 0.11  | 0.136 | <b>0.128</b> |
|              | mission3-7 | 0.068 | 0.156 | <b>0.126</b> |
|              | mission4-8 | 0.087 | 0.15  | <b>0.123</b> |

Table S88. Values of difference in elevation collected applying method B, from 3-point-spacing-DSMs generated through LiDAR processing. Values were measured along the profile at the peeled areas averaged to estimate the reference value of elevation difference for each sector. Values are expressed in meters.

| mission1-5 |       | mission2-6 |       | mission3-7 |       | mission4-8 |       |
|------------|-------|------------|-------|------------|-------|------------|-------|
| c1-c2      | c3-c4 | c1-c2      | c3-c4 | c1-c2      | c3-c4 | c1-c2      | c3-c4 |
| 0.064      | 0.071 | 0.064      | 0.154 | 0.096      | 0.08  | 0.06       | 0.129 |
| 0.066      | 0.083 | 0.068      | 0.156 | 0.085      | 0.097 | 0.056      | 0.091 |
| 0.062      | 0.093 | 0.07       | 0.151 | 0.065      | 0.115 | 0.055      | 0.101 |
| 0.062      | 0.101 | 0.073      | 0.142 | 0.06       | 0.132 | 0.048      | 0.109 |
| 0.061      | 0.112 | 0.076      | 0.135 | 0.058      | 0.131 | 0.042      | 0.118 |
| 0.061      | 0.117 | 0.075      | 0.13  | 0.062      | 0.13  | 0.042      | 0.114 |
| 0.06       | 0.131 | 0.078      | 0.125 | 0.063      | 0.126 | 0.043      | 0.109 |
| 0.064      | 0.138 | 0.076      | 0.118 | 0.06       | 0.125 | 0.045      | 0.105 |
| 0.069      | 0.147 | 0.073      | 0.109 | 0.06       | 0.12  | 0.049      | 0.105 |
| 0.074      | 0.149 | 0.074      | 0.112 | 0.063      | 0.115 | 0.053      | 0.103 |
| 0.08       | 0.138 | 0.076      | 0.11  | 0.062      | 0.112 | 0.059      | 0.116 |
| 0.082      | 0.135 | 0.075      | 0.105 | 0.051      | 0.128 | 0.063      | 0.129 |
| 0.082      | 0.135 | 0.074      | 0.1   | 0.046      | 0.138 | 0.063      | 0.127 |
| 0.077      | 0.134 | 0.072      | 0.094 | 0.057      | 0.142 | 0.063      | 0.129 |
| 0.073      | 0.138 | 0.074      | 0.084 | 0.062      | 0.145 | 0.06       | 0.127 |

Table S89. Resume of elevation difference values collected from method B application on 3-point-spacing-DSMs.

|              |            | min   | max   | average      |
|--------------|------------|-------|-------|--------------|
| sector c1-c2 | mission1-5 | 0.06  | 0.082 | <b>0.069</b> |
|              | mission2-6 | 0.064 | 0.078 | <b>0.073</b> |
|              | mission3-7 | 0.046 | 0.096 | <b>0.063</b> |
|              | mission4-8 | 0.042 | 0.063 | <b>0.053</b> |
| sector c3-c4 | mission1-5 | 0.071 | 0.149 | <b>0.121</b> |
|              | mission2-6 | 0.084 | 0.156 | <b>0.122</b> |
|              | mission3-7 | 0.08  | 0.145 | <b>0.122</b> |
|              | mission4-8 | 0.091 | 0.129 | <b>0.114</b> |

Table S90. Values of difference in elevation collected applying method B, from 5-point-spacing-DSMs generated through LiDAR processing. Values were measured along the profile at the peeled areas averaged to estimate the reference value of elevation difference for each sector. Values are expressed in meters.

| mission1-5 |       | mission2-6 |       | mission3-7 |       | mission4-8 |       |
|------------|-------|------------|-------|------------|-------|------------|-------|
| c1-c2      | c3-c4 | c1-c2      | c3-c4 | c1-c2      | c3-c4 | c1-c2      | c3-c4 |
| 0.042      | 0.07  | 0.066      | 0.098 | 0.057      | 0.084 | 0.065      | 0.102 |
| 0.047      | 0.075 | 0.063      | 0.081 | 0.077      | 0.101 | 0.066      | 0.108 |
| 0.05       | 0.083 | 0.061      | 0.083 | 0.064      | 0.124 | 0.059      | 0.115 |
| 0.051      | 0.091 | 0.061      | 0.085 | 0.055      | 0.125 | 0.053      | 0.12  |
| 0.055      | 0.096 | 0.058      | 0.087 | 0.06       | 0.118 | 0.045      | 0.121 |
| 0.06       | 0.104 | 0.057      | 0.088 | 0.056      | 0.106 | 0.04       | 0.12  |
| 0.057      | 0.112 | 0.054      | 0.09  | 0.055      | 0.111 | 0.039      | 0.111 |
| 0.056      | 0.118 | 0.053      | 0.092 | 0.059      | 0.121 | 0.043      | 0.101 |
| 0.054      | 0.12  | 0.051      | 0.094 | 0.063      | 0.129 | 0.048      | 0.095 |
| 0.054      | 0.116 | 0.049      | 0.093 | 0.064      | 0.134 | 0.055      | 0.092 |
| 0.054      | 0.11  | 0.047      | 0.093 | 0.064      | 0.133 | 0.06       | 0.095 |
| 0.056      | 0.107 | 0.046      | 0.092 | 0.059      | 0.132 | 0.065      | 0.099 |
| 0.054      | 0.105 | 0.041      | 0.092 | 0.049      | 0.133 | 0.063      | 0.104 |
| 0.055      | 0.101 | 0.041      | 0.091 | 0.045      | 0.135 | 0.061      | 0.11  |
| 0.054      | 0.095 | 0.039      | 0.096 | 0.046      | 0.136 | 0.056      | 0.118 |

Table S91. Resume of elevation difference values collected from method B application on 5-point-spacing-DSMs.

|              |            | min   | max   | average      |
|--------------|------------|-------|-------|--------------|
| sector c1-c2 | mission1-5 | 0.042 | 0.06  | <b>0.053</b> |
|              | mission2-6 | 0.039 | 0.066 | <b>0.052</b> |
|              | mission3-7 | 0.045 | 0.077 | <b>0.058</b> |
|              | mission4-8 | 0.039 | 0.066 | <b>0.055</b> |
| sector c3-c4 | mission1-5 | 0.07  | 0.12  | <b>0.100</b> |
|              | mission2-6 | 0.081 | 0.098 | <b>0.090</b> |
|              | mission3-7 | 0.084 | 0.136 | <b>0.121</b> |
|              | mission4-8 | 0.092 | 0.121 | <b>0.107</b> |

Table S92. Field values of vegetation height removed at each sector. Values in meters.

|              | Field value | average |
|--------------|-------------|---------|
| sector c1-c2 | 0.07        | 0.07    |
|              | 0.06        |         |
|              | 0.06        |         |
|              | 0.09        |         |
| sector c3-c4 | 0.15        | 0.13    |
|              | 0.18        |         |
|              | 0.10        |         |
|              | 0.10        |         |

Table S93. Elevation difference estimations from method A and method B. 'CC' column shows values extracted from the point cloud through method A, while other columns identify the digital model: p4d corresponds to photogrammetric-processing-derived model; 1ps, 3ps and 5ps are the LiDAR-processing models build at 1-, 3- and 5-point-spacing resolution, respectively. Values expressed in meters.

|              |            | Method A | Method B |      |      |      |
|--------------|------------|----------|----------|------|------|------|
|              |            | CC       | p4d      | 1ps  | 3ps  | 5ps  |
| sector c1-c2 | mission1-5 | 0.08     | 0.07     | 0.07 | 0.07 | 0.05 |
|              | mission2-6 | 0.08     | 0.06     | 0.08 | 0.07 | 0.05 |
|              | mission3-7 | 0.07     | 0.18     | 0.06 | 0.06 | 0.06 |
|              | mission4-8 | 0.07     | 0.07     | 0.07 | 0.05 | 0.05 |
| sector c3-c4 | mission1-5 | 0.12     | 0.13     | 0.15 | 0.12 | 0.10 |
|              | mission2-6 | 0.12     | 0.11     | 0.13 | 0.12 | 0.09 |
|              | mission3-7 | 0.12     | 0.23     | 0.13 | 0.12 | 0.12 |
|              | mission4-8 | 0.11     | 0.12     | 0.12 | 0.11 | 0.11 |

Table S94. Values of deviation between field measures and values estimated through method A. Values in meters.

|            | point cloud vs field |       |
|------------|----------------------|-------|
|            | c1-c2                | c3-c4 |
| mission1-5 | 0.01                 | -0.01 |
| mission2-6 | 0.01                 | -0.01 |
| mission3-7 | 0.00                 | -0.01 |
| mission4-8 | 0.00                 | -0.02 |

Table S95. Deviations between field measures and values estimated through method B (Models). Values in meters.

|            | Models vs field |       |       |       |       |       |       |       |
|------------|-----------------|-------|-------|-------|-------|-------|-------|-------|
|            | p4d             |       | 1ps   |       | 3ps   |       | 5ps   |       |
|            | c1-c2           | c3-c4 | c1-c2 | c3-c4 | c1-c2 | c3-c4 | c1-c2 | c3-c4 |
| mission1-5 | 0.00            | 0.00  | 0.00  | 0.02  | 0.00  | -0.01 | -0.02 | -0.03 |
| mission2-6 | -0.01           | -0.02 | 0.01  | 0.00  | 0.00  | -0.01 | -0.02 | -0.04 |
| mission3-7 | 0.11            | 0.10  | -0.01 | 0.00  | -0.01 | -0.01 | -0.01 | -0.01 |
| mission4-8 | 0.00            | -0.01 | 0.00  | -0.01 | -0.02 | -0.02 | -0.02 | -0.02 |

Table S96. Results from method C application. Comparison of elevation values difference at peeled areas measured on the field (onfield column), estimated through method A (CC column), method B (1ps, 3ps and 5ps column) and method C (extracted from DOD). In “divergence” columns the difference between DOD extracted values and field values are shown; just one column from method C was considered because results were pretty identical. Values are expressed in meters.

|              | onfield | mission | CC   | 1ps  | DOD <sub>1-5</sub> | DOD <sub>1-10</sub> | DOD <sub>1-15</sub> | divergence |
|--------------|---------|---------|------|------|--------------------|---------------------|---------------------|------------|
| sector c1-c2 | 0.07    | 1       | 0.08 | 0.07 | 0.12               | 0.12                | 0.12                | 0.05       |
|              |         | 2       | 0.08 | 0.08 | 0.01               | 0.02                | 0.01                | -0.06      |
|              |         | 3       | 0.07 | 0.06 | 0.04               | 0.04                | 0.04                | -0.03      |
|              |         | 4       | 0.07 | 0.07 | 0.06               | 0.06                | 0.06                | -0.01      |
| sector c3-c4 | 0.13    | 1       | 0.12 | 0.15 | 0.10               | 0.10                | 0.10                | -0.03      |
|              |         | 2       | 0.12 | 0.13 | 0.07               | 0.06                | 0.06                | -0.06      |
|              |         | 3       | 0.12 | 0.13 | 0.05               | 0.05                | 0.05                | -0.09      |
|              |         | 4       | 0.11 | 0.12 | 0.06               | 0.06                | 0.06                | -0.07      |

  

|              | onfield | mission | CC   | 3ps  | DOD <sub>3-5</sub> | DOD <sub>3-10</sub> | DOD <sub>3-15</sub> | divergence |
|--------------|---------|---------|------|------|--------------------|---------------------|---------------------|------------|
| sector c1-c2 | 0.07    | 1       | 0.08 | 0.07 | 0.16               | 0.16                | 0.16                | 0.09       |
|              |         | 2       | 0.08 | 0.07 | 0.03               | 0.03                | 0.03                | -0.04      |
|              |         | 3       | 0.07 | 0.06 | 0.09               | 0.09                | 0.08                | 0.02       |
|              |         | 4       | 0.07 | 0.05 | 0.08               | 0.08                | 0.08                | 0.01       |
| sector c3-c4 | 0.13    | 1       | 0.12 | 0.12 | 0.14               | 0.14                | 0.14                | 0.01       |
|              |         | 2       | 0.12 | 0.12 | 0.11               | 0.10                | 0.10                | -0.02      |
|              |         | 3       | 0.12 | 0.12 | 0.11               | 0.11                | 0.11                | -0.02      |
|              |         | 4       | 0.11 | 0.11 | 0.08               | 0.08                | 0.08                | -0.05      |

  

|              | onfield | mission | CC   | 5ps  | DOD <sub>5-5</sub> | DOD <sub>5-10</sub> | DOD <sub>5-15</sub> | divergence |
|--------------|---------|---------|------|------|--------------------|---------------------|---------------------|------------|
| sector c1-c2 | 0.07    | 1       | 0.08 | 0.05 | 0.16               | 0.16                | 0.16                | 0.09       |
|              |         | 2       | 0.08 | 0.05 | 0.04               | 0.04                | 0.04                | -0.03      |
|              |         | 3       | 0.07 | 0.06 | 0.11               | 0.12                | 0.12                | 0.04       |
|              |         | 4       | 0.07 | 0.05 | 0.09               | 0.09                | 0.09                | 0.02       |
| sector c3-c4 | 0.13    | 1       | 0.12 | 0.10 | 0.17               | 0.16                | 0.17                | 0.04       |
|              |         | 2       | 0.12 | 0.09 | 0.11               | 0.11                | 0.11                | -0.02      |
|              |         | 3       | 0.12 | 0.12 | 0.11               | 0.12                | 0.11                | -0.02      |
|              |         | 4       | 0.11 | 0.11 | 0.11               | 0.12                | 0.12                | -0.02      |

Table S97. Quality check of point cloud from PNOA2015-LiDAR. Elevation values for GCPs (Point elevation), elevation values of the corresponding point from the PNOA2015-LiDAR point cloud (PNOA2015), and RMSE value at each point. Elevation values are expressed in orthometric height.

| ID    | Point elevation | PNOA2015 | RMSE  |
|-------|-----------------|----------|-------|
| T21   | 2.111           | 0.586    | 1.525 |
| P6    | 2.416           | 0.947    | 1.469 |
| P33   | 2.187           | 0.728    | 1.459 |
| P21   | 2.588           | 1.159    | 1.429 |
| P31   | 2.267           | 0.847    | 1.42  |
| FIJO5 | 3.741           | 2.324    | 1.417 |
| P22   | 2.451           | 1.034    | 1.417 |
| P34   | 2.162           | 0.748    | 1.414 |
| P11   | 2.712           | 1.3      | 1.412 |
| T22   | 2.196           | 0.784    | 1.412 |
| P14   | 2.626           | 1.218    | 1.408 |
| T15   | 2.444           | 1.038    | 1.406 |
| P1    | 2.739           | 1.333    | 1.406 |
| FIJO2 | 3.93            | 2.532    | 1.398 |
| T14   | 2.489           | 1.094    | 1.395 |
| P12   | 2.693           | 1.3      | 1.393 |
| T24   | 2.23            | 0.841    | 1.389 |
| T68   | 2.658           | 1.27     | 1.388 |
| P20   | 2.589           | 1.203    | 1.386 |
| P2    | 2.569           | 1.183    | 1.386 |
| P26   | 2.45            | 1.076    | 1.374 |
| P19   | 2.577           | 1.205    | 1.372 |
| P9    | 2.647           | 1.275    | 1.372 |
| T20   | 2.451           | 1.082    | 1.369 |
| FIJO6 | 3.87            | 2.502    | 1.368 |
| P3    | 2.459           | 1.093    | 1.366 |
| P25   | 2.469           | 1.109    | 1.36  |
| T46   | 2.618           | 1.258    | 1.36  |
| T30   | 2.465           | 1.109    | 1.356 |
| T10   | 2.674           | 1.319    | 1.355 |
| P24   | 2.538           | 1.184    | 1.354 |
| P18   | 2.595           | 1.243    | 1.352 |
| FIJO3 | 3.913           | 2.563    | 1.35  |
| FIJO4 | 4.005           | 2.66     | 1.345 |
| P8    | 2.634           | 1.289    | 1.345 |
| P5    | 2.217           | 0.874    | 1.343 |
| P7    | 2.516           | 1.176    | 1.34  |
| T25   | 2.188           | 0.851    | 1.337 |
| P32   | 2.211           | 0.879    | 1.332 |
| FIJO1 | 3.956           | 2.628    | 1.328 |
| T35   | 2.377           | 1.051    | 1.326 |
| P13   | 2.683           | 1.358    | 1.325 |
| T23   | 2.19            | 0.874    | 1.316 |
| T17   | 2.68            | 1.369    | 1.311 |
| P10   | 2.586           | 1.281    | 1.305 |
| T56   | 2.664           | 1.382    | 1.282 |
| P4    | 2.185           | 0.927    | 1.258 |
| P35   | 2.082           | 0.826    | 1.256 |
| P28   | 2.362           | 1.109    | 1.253 |
| P17   | 2.519           | 1.283    | 1.236 |
| P29   | 2.222           | 1.059    | 1.163 |
| P23   | 2.234           | 1.086    | 1.148 |
| P30   | 2.012           | 0.921    | 1.091 |

|     |       |       |       |
|-----|-------|-------|-------|
| P15 | 2.273 | 1.185 | 1.088 |
| P27 | 2.18  | 1.113 | 1.067 |
| P16 | 2.259 | 1.247 | 1.012 |
| R38 | 2.452 | 0.91  | 1.542 |
| R56 | 2.347 | 0.844 | 1.503 |
| R11 | 2.564 | 1.078 | 1.486 |
| R26 | 2.644 | 1.175 | 1.469 |
| R40 | 2.61  | 1.145 | 1.465 |
| R54 | 2.417 | 0.954 | 1.463 |
| R35 | 2.494 | 1.039 | 1.455 |
| R55 | 2.479 | 1.029 | 1.45  |
| C3  | 2.608 | 1.173 | 1.435 |
| R45 | 2.581 | 1.171 | 1.41  |
| R28 | 2.644 | 1.236 | 1.408 |
| R8  | 2.589 | 1.187 | 1.402 |
| R50 | 2.536 | 1.136 | 1.4   |
| R46 | 2.59  | 1.192 | 1.398 |
| R12 | 2.627 | 1.234 | 1.393 |
| R53 | 2.57  | 1.177 | 1.393 |
| R4  | 2.635 | 1.25  | 1.385 |
| R5  | 2.614 | 1.232 | 1.382 |
| C4  | 2.548 | 1.167 | 1.381 |
| R14 | 2.672 | 1.292 | 1.38  |
| R1  | 3.951 | 2.572 | 1.379 |
| R44 | 2.577 | 1.2   | 1.377 |
| R2  | 2.679 | 1.302 | 1.377 |
| B1  | 2.199 | 0.823 | 1.376 |
| R39 | 2.614 | 1.241 | 1.373 |
| R21 | 2.66  | 1.288 | 1.372 |
| R20 | 2.651 | 1.28  | 1.371 |
| R51 | 2.5   | 1.135 | 1.365 |
| R6  | 2.613 | 1.25  | 1.363 |
| R10 | 2.614 | 1.253 | 1.361 |
| R9  | 2.553 | 1.193 | 1.36  |
| R17 | 2.69  | 1.33  | 1.36  |
| R49 | 2.416 | 1.058 | 1.358 |
| R48 | 2.436 | 1.079 | 1.357 |
| R3  | 2.618 | 1.261 | 1.357 |
| R22 | 2.62  | 1.263 | 1.357 |
| B2  | 2.403 | 1.046 | 1.357 |
| R31 | 2.688 | 1.335 | 1.353 |
| R37 | 2.493 | 1.142 | 1.351 |
| R7  | 2.588 | 1.239 | 1.349 |
| R41 | 2.615 | 1.267 | 1.348 |
| C2  | 2.707 | 1.36  | 1.347 |
| R52 | 2.457 | 1.11  | 1.347 |
| R43 | 2.635 | 1.289 | 1.346 |
| R23 | 2.593 | 1.248 | 1.345 |
| C1  | 2.71  | 1.365 | 1.345 |
| R34 | 2.67  | 1.325 | 1.345 |
| R33 | 2.647 | 1.305 | 1.342 |
| R32 | 2.692 | 1.35  | 1.342 |
| R24 | 2.551 | 1.211 | 1.34  |
| R36 | 2.599 | 1.262 | 1.337 |
| R30 | 2.641 | 1.309 | 1.332 |
| R27 | 2.63  | 1.302 | 1.328 |
| R25 | 2.658 | 1.331 | 1.327 |
| R16 | 2.704 | 1.382 | 1.322 |

|              |       |       |                  |
|--------------|-------|-------|------------------|
| R47          | 2.512 | 1.195 | 1.317            |
| B3           | 2.669 | 1.354 | 1.315            |
| R18          | 2.712 | 1.409 | 1.303            |
| R15          | 2.674 | 1.387 | 1.287            |
| R42          | 2.65  | 1.367 | 1.283            |
| R19          | 2.634 | 1.354 | 1.28             |
| R29          | 2.675 | 1.4   | 1.275            |
| R13          | 2.558 | 1.304 | 1.254            |
| average RMSE |       |       | <b>1.3563962</b> |

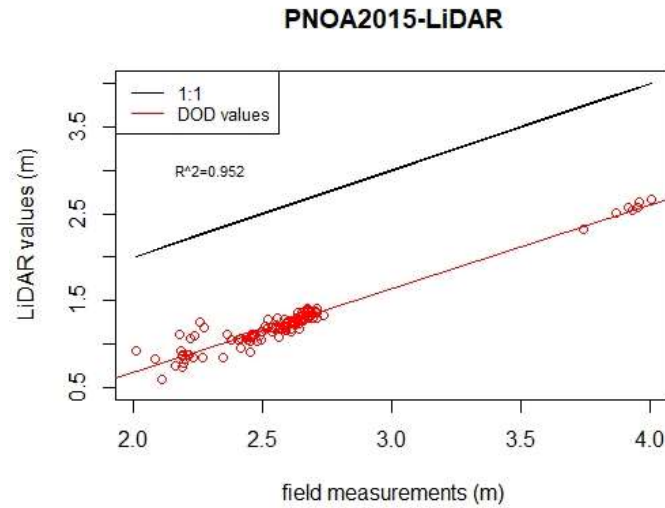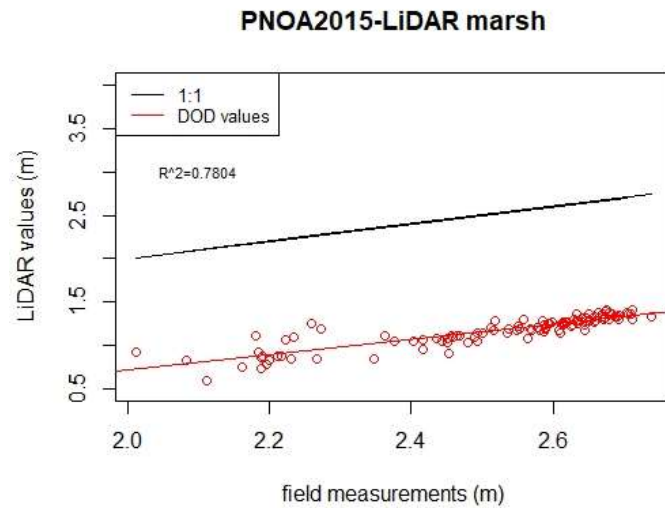

Figure S32. Linear regression and  $R^2$  value for the PNOA2015-LiDAR point cloud values compared to GCPs from both campaigns. Upper graph plots all points, while lower graph shows the existing relationship by using only the points situated on the marsh surface. The red line is the regression line for the compared datasets, the black line represents the 1:1 pattern.

Table S98. Elevation values for GCPs, and the corresponding point from DEMs derived from PNOA2015-LiDAR dataset. 'Elevation' column represents the GCP elevation value, 'PNOA2015\_DEM' column shows the corresponding value of elevation sampled from the DEM. Elevation values are expressed in ellipsoidal height. In the last column the value of the error associated to each point.

| Point Id | Elevation (m) | PNOA2015_DEM (m) | Difference (m) |
|----------|---------------|------------------|----------------|
| FIJO1    | 47.457        | 46.167           | -1.29          |
| FIJO2    | 47.431        | 46.172           | -1.259         |
| FIJO3    | 47.413        | 46.14            | -1.273         |
| FIJO4    | 47.505        | 46.288           | -1.217         |
| FIJO5    | 47.242        | 46.148           | -1.094         |
| FIJO6    | 47.371        | 46.128           | -1.243         |
| P1       | 46.239        | 45.99            | -0.249         |
| P10      | 46.087        | 44.823           | -1.264         |
| P11      | 46.213        | 44.884           | -1.329         |
| P12      | 46.194        | 44.884           | -1.31          |
| P13      | 46.184        | 44.887           | -1.297         |
| P14      | 46.127        | 44.865           | -1.262         |
| P15      | 45.774        | 44.865           | -0.909         |
| P16      | 45.759        | 44.882           | -0.877         |
| P17      | 46.019        | 44.882           | -1.137         |
| P18      | 46.096        | 44.882           | -1.214         |
| P19      | 46.078        | 44.736           | -1.342         |
| P2       | 46.069        | 44.769           | -1.3           |
| P20      | 46.09         | 44.727           | -1.363         |
| P21      | 46.089        | 44.727           | -1.362         |
| P22      | 45.952        | 44.716           | -1.236         |
| P23      | 45.735        | 44.716           | -1.019         |
| P24      | 46.039        | 44.716           | -1.323         |
| P25      | 45.97         | 44.657           | -1.313         |
| P26      | 45.95         | 44.657           | -1.293         |
| P27      | 45.681        | 44.638           | -1.043         |
| P28      | 45.863        | 44.638           | -1.225         |
| P29      | 45.723        | 44.638           | -1.085         |
| P3       | 45.96         | 44.769           | -1.191         |
| P30      | 45.513        | 44.623           | -0.89          |
| P31      | 45.768        | 44.544           | -1.224         |
| P32      | 45.712        | 44.505           | -1.207         |
| P33      | 45.687        | 44.505           | -1.182         |
| P34      | 45.663        | 44.399           | -1.264         |
| P35      | 45.583        | 44.399           | -1.184         |
| P4       | 45.686        | 44.615           | -1.071         |
| P5       | 45.717        | 44.615           | -1.102         |
| P6       | 45.917        | 44.615           | -1.302         |
| P7       | 46.017        | 44.843           | -1.174         |
| P8       | 46.135        | 44.843           | -1.292         |
| P9       | 46.147        | 44.853           | -1.294         |
| T10      | 46.175        | 44.895           | -1.28          |
| T14      | 45.99         | 44.695           | -1.295         |
| T15      | 45.944        | 44.655           | -1.289         |
| T17      | 46.181        | 44.948           | -1.233         |
| T20      | 45.951        | 44.705           | -1.246         |
| T21      | 45.612        | 44.312           | -1.3           |
| T22      | 45.697        | 44.312           | -1.385         |
| T23      | 45.691        | 44.406           | -1.285         |
| T24      | 45.731        | 44.406           | -1.325         |
| T25      | 45.689        | 44.43            | -1.259         |
| T30      | 45.966        | 44.655           | -1.311         |
| T35      | 45.878        | 44.658           | -1.22          |
| T46      | 46.119        | 44.855           | -1.264         |
| T56      | 46.164        | 44.895           | -1.269         |

|     |        |        |        |
|-----|--------|--------|--------|
| T68 | 46.159 | 44.855 | -1.304 |
| B1  | 45.7   | 44.443 | -1.257 |
| B2  | 45.904 | 44.641 | -1.263 |
| B3  | 46.17  | 44.935 | -1.235 |
| C1  | 46.211 | 44.802 | -1.409 |
| C2  | 46.208 | 44.902 | -1.306 |
| C3  | 46.109 | 44.724 | -1.385 |
| C4  | 46.049 | 44.672 | -1.377 |
| R1  | 47.452 | 46.113 | -1.339 |
| R10 | 46.115 | 44.772 | -1.343 |
| R11 | 46.064 | 44.735 | -1.329 |
| R12 | 46.128 | 44.81  | -1.318 |
| R13 | 46.059 | 44.867 | -1.192 |
| R14 | 46.172 | 44.894 | -1.278 |
| R15 | 46.175 | 45.011 | -1.164 |
| R16 | 46.205 | 44.961 | -1.244 |
| R17 | 46.191 | 44.927 | -1.264 |
| R18 | 46.213 | 44.925 | -1.288 |
| R19 | 46.135 | 44.921 | -1.214 |
| R2  | 46.18  | 45.036 | -1.144 |
| R20 | 46.152 | 44.929 | -1.223 |
| R21 | 46.161 | 44.802 | -1.359 |
| R22 | 46.121 | 44.839 | -1.282 |
| R23 | 46.094 | 44.877 | -1.217 |
| R24 | 46.052 | 44.865 | -1.187 |
| R25 | 46.159 | 44.948 | -1.211 |
| R26 | 46.145 | 44.893 | -1.252 |
| R27 | 46.131 | 44.902 | -1.229 |
| R28 | 46.145 | 44.902 | -1.243 |
| R29 | 46.176 | 44.942 | -1.234 |
| R3  | 46.119 | 44.877 | -1.242 |
| R30 | 46.142 | 44.891 | -1.251 |
| R31 | 46.189 | 44.884 | -1.305 |
| R32 | 46.193 | 44.914 | -1.279 |
| R33 | 46.148 | 44.91  | -1.238 |
| R34 | 46.171 | 44.91  | -1.261 |
| R35 | 45.995 | 44.895 | -1.1   |
| R36 | 46.1   | 44.814 | -1.286 |
| R37 | 45.994 | 44.838 | -1.156 |
| R38 | 45.953 | 44.657 | -1.296 |
| R39 | 46.115 | 44.839 | -1.276 |
| R4  | 46.136 | 44.877 | -1.259 |
| R40 | 46.111 | 44.753 | -1.358 |
| R41 | 46.116 | 44.837 | -1.279 |
| R42 | 46.151 | 44.883 | -1.268 |
| R43 | 46.136 | 44.914 | -1.222 |
| R44 | 46.078 | 44.783 | -1.295 |
| R45 | 46.082 | 44.845 | -1.237 |
| R46 | 46.091 | 44.774 | -1.317 |
| R47 | 46.013 | 44.728 | -1.285 |
| R48 | 45.937 | 44.681 | -1.256 |
| R49 | 45.917 | 44.648 | -1.269 |
| R5  | 46.114 | 44.812 | -1.302 |
| R50 | 46.037 | 44.719 | -1.318 |
| R51 | 46.001 | 44.657 | -1.344 |
| R52 | 45.958 | 44.699 | -1.259 |
| R53 | 46.071 | 44.741 | -1.33  |
| R54 | 45.918 | 44.634 | -1.284 |
| R55 | 45.98  | 44.69  | -1.29  |
| R56 | 45.848 | 44.531 | -1.317 |

|              |        |        |            |
|--------------|--------|--------|------------|
| R6           | 46.114 | 44.825 | -1.289     |
| R7           | 46.089 | 44.825 | -1.264     |
| R8           | 46.09  | 44.788 | -1.302     |
| R9           | 46.054 | 44.883 | -1.171     |
| average RMSE |        |        | 1.24832383 |

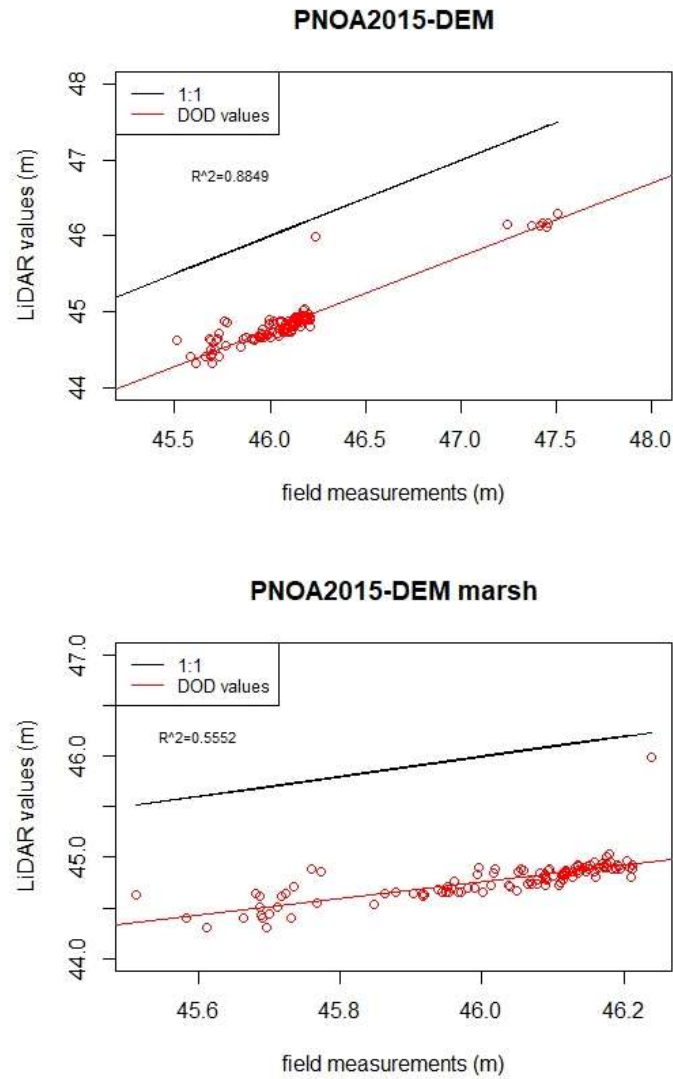

Figure S33. Linear regressions and  $R^2$  value for the DEM generated from the PNOA2015LiDAR dataset compared to GCPs from both campaigns. Upper graph plots all points, while lower graph shows the existing relationship by using only the points situated on the marsh surface. The red line is the regression line for the compared datasets, the black line represents the 1:1 pattern.
